# Supplementary material
Source: Royal Society of Chemistry journal article supplement (doi:10.1039/d6cc01160h)

# Supporting Information

## Synthesis of pyrazolo[5,1-*a*]isoindoles via silver-mediated cascade cyclization of 1,5-enynes with diazo compounds

Jiarong Li,<sup>a</sup> He Wang,<sup>\*a</sup> Chunbo Li,<sup>a</sup> Jing Sun,<sup>a</sup> Xin Wang,<sup>b</sup> Ran Sun<sup>b</sup> and Lei Li<sup>\*b</sup>

<sup>a</sup>School of Petrochemical Engineering, Liaoning Petrochemical University, Fushun  
113001, P.R. China. E-mail: [heliwang123@126.com](mailto:heliwang123@126.com).

<sup>b</sup>Faculty of Science, Liaoning Petrochemical University, Fushun 113  
001, P. R. China. E-mail: [lilei0814.com@163.com](mailto:lilei0814.com@163.com).

### Table of Contents

|                                                                              |    |
|------------------------------------------------------------------------------|----|
| 1. General Information .....                                                 | 2  |
| 2. Preparation of substrates and analytical data of compounds <b>1</b> ..... | 2  |
| 3. Experimental section and analytical data of compound <b>3</b> .....       | 15 |
| 4. Derivatization of Product .....                                           | 36 |
| 6. Crystal structure of <b>3aa</b> .....                                     | 43 |
| 7. References .....                                                          | 44 |
| 8. NMR Spectra .....                                                         | 45 |

## 1. General Information

All chemicals were obtained from commercial sources and used as received unless otherwise noted. The  $^1\text{H}$  NMR spectra were recorded at 400 MHz in  $\text{CDCl}_3$  and the  $^{13}\text{C}$  NMR spectra were recorded at 101 MHz in  $\text{CDCl}_3$  with TMS as the internal standard. All coupling constants ( $J$  values) were reported in Hertz (Hz). High-resolution mass spectra (HRMS) were obtained using a waters UPLC G2-XS focus spectrometer (ESI-TOF). Column chromatography was performed on silica gel (300-400 mesh) with ethyl acetate (EA)/petroleum ether (PE).

## 2. Preparation of substrates and analytical data of compounds 1

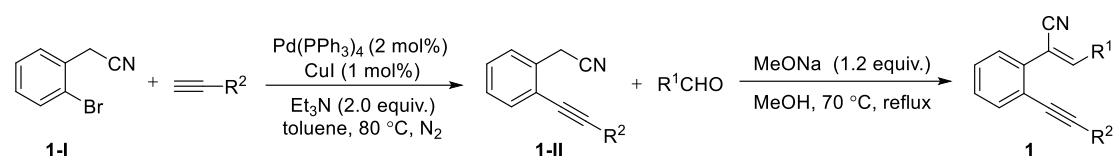

**Scheme S1.** Synthesis of 1,5-Enynes **1**.

### Typical synthetic procedure (with **1a** as an example)

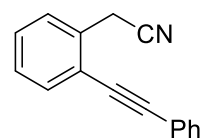

**Synthesis of 2-(2-(phenylethynyl)phenyl)acetonitrile<sup>[1]</sup>:** The 2-(2-bromophenyl)acetonitrile (10.0 mmol),  $\text{Pd}(\text{PPh}_3)_4$  (2 mol%, 0.2 mmol, 0.23 g),  $\text{CuI}$  (1 mol%, 0.1 mmol, 19.1 mg),  $\text{Et}_3\text{N}$  (20.0 mmol) were placed in a nitrogen-filled Schlenk tube. After toluene (50 mL) was added, the mixture was stirred at room temperature for 5 minutes and phenylacetylene (12.0 mmol) was added. The reaction mixture was allowed to stir at  $80\text{ }^\circ\text{C}$  for 12 h and the resulting solution was filtered and washed with saturated brine and extracted with ethyl acetate ( $3 \times 20\text{ mL}$ ). The combined organic layers were dried over anhydrous  $\text{Na}_2\text{SO}_4$  and concentrated under vacuum to yield the product. The compound was Purified by column to give 2-(2-(phenylethynyl)phenyl)acetonitrile white solid (1.96 g, 90%).

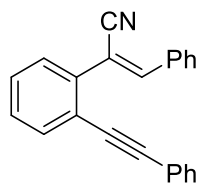

**Synthesis of (Z)-3-phenyl-2-(2-(phenylethynyl)phenyl)acrylonitrile:** To a solution of ethyl 2-(2-(phenylethynyl)phenyl)acetonitrile (10.0 mmol, 2.17 g) in 50 mL of methyl alcohol was added benzaldehyde (12.0 mmol, 1.2 equiv.) and sodium methylate (12.0 mmol, 1.2 equiv., 0.65 g). The reaction mixture was stirred in an oil bath at 70 °C. After 12 h, the reaction mixture was cooled to room temperature. The mixture was extracted with CH<sub>2</sub>Cl<sub>2</sub> three times, dried over the anhydrous Na<sub>2</sub>SO<sub>4</sub> and concentrated in vacuo. The compound was Purified by column to give (Z)-3-phenyl-2-(2-(phenylethynyl)phenyl)acrylonitrile white solid (2.19 g, 72%).

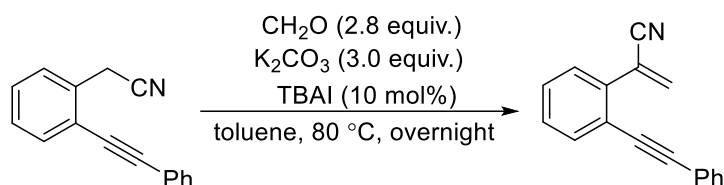

**Synthesis of 2-(2-(phenylethynyl)phenyl)acrylonitrile (1p)<sup>[2]</sup>:** The ethyl 2-(2-(phenylethynyl)phenyl)acetonitrile (10.0 mmol, 2.17 g), K<sub>2</sub>CO<sub>3</sub> (30 mmol, 4.14 g) and TBAI (0.1 mmol, 0.37g) were dissolved in toluene (20 mL) and allowed to stir under reflux. The CH<sub>2</sub>O (37% in H<sub>2</sub>O, 2 mL) was slowly injected into the solution in toluene for the period over 2 h. The reaction mixture was allowed to stir for overnight at 80 °C, then quenched with H<sub>2</sub>O and extracted with ethyl acetate for three times. The combined organic layer was collected and dried over anhydrous MgSO<sub>4</sub>, purified by column chromatography to afford yellow liquid (0.92 g, 40%).

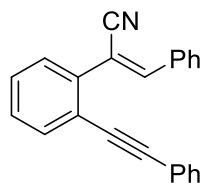

**(Z)-3-phenyl-2-(2-(phenylethynyl)phenyl)acrylonitrile (1a)**

Purified by column chromatography using petroleum ether/ ethyl acetate (10:1, V/V) as an eluent. Pale yellow solid; m.p.: 100-102 °C; yield: 2.19 g (72%); <sup>1</sup>H NMR (400 MHz, CDCl<sub>3</sub>) δ 7.94-7.92 (m, 2H), 7.69 (s, 1H), 7.67-7.65 (m, 1H), 7.57-7.55 (m, 1H),

7.51-7.45 (m, 5H), 7.44-7.37 (m, 2H), 7.33-7.27 (m, 3H).  $^{13}\text{C}$  NMR (101 MHz,  $\text{CDCl}_3$ )  $\delta$  147.3, 137.0, 133.6, 133.5, 131.5, 130.7, 129.3, 128.9, 128.9, 128.8, 128.7, 128.6, 128.4, 122.8, 121.7, 117.9, 110.2, 95.1, 87.4. HRMS (ESI-TOF)  $m/z$ :  $[\text{M}+\text{Na}]^+$  Calcd for  $\text{C}_{23}\text{H}_{15}\text{NNa}^+$  328.1102; Found 328.1107.

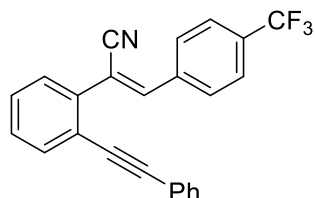

**(Z)-2-(2-(phenylethynyl)phenyl)-3-(4-(trifluoromethyl)phenyl)acrylonitrile (1b)**

Purified by column chromatography using petroleum ether/ ethyl acetate (10:1, V/V) as an eluent. Pale yellow solid; m.p.: 108-110 °C; yield: 2.53 g (68%);  $^1\text{H}$  NMR (400 MHz,  $\text{CDCl}_3$ )  $\delta$  8.01-7.98 (m, 2H), 7.73-7.71 (m, 3H), 7.68-7.64 (m, 1H), 7.58-7.53 (m, 1H), 7.51-7.45 (m, 2H), 7.45-7.39 (m, 2H), 7.36-7.28 (m, 3H).  $^{13}\text{C}$  NMR (101 MHz,  $\text{CDCl}_3$ )  $\delta$  145.3, 136.8, 136.8, 136.2, 133.6, 132.0 (q,  $J = 32.5$  Hz), 131.5, 129.4, 129.2, 128.9, 128.9, 128.8, 128.4, 126.0, 125.9 (q,  $J = 3.7$  Hz), 123.7 (q,  $J = 270.6$  Hz), 122.6, 121.7, 117.3, 113.0, 95.4, 87.1.  $^{19}\text{F}$  NMR (376 MHz,  $\text{CDCl}_3$ )  $\delta$  -62. 91. HRMS (ESI-TOF)  $m/z$ :  $[\text{M}+\text{Na}]^+$  Calcd for  $\text{C}_{24}\text{H}_{14}\text{NNaF}_3^+$  396.0976; Found 396.0981.

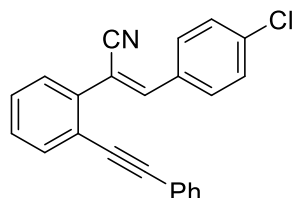

**(Z)-3-(4-chlorophenyl)-2-(2-(phenylethynyl)phenyl)acrylonitrile (1c)**

Purified by column chromatography using petroleum ether/ ethyl acetate (10:1, V/V) as an eluent. Pale yellow solid; m.p.: 101-103 °C; yield: 2.51 g (74%);  $^1\text{H}$  NMR (400 MHz,  $\text{CDCl}_3$ )  $\delta$  7.87-7.84 (m, 2H), 7.67-7.62 (m, 2H), 7.55-7.52 (m, 1H), 7.48-7.36 (m, 6H), 7.33-7.29 (m, 3H).  $^{13}\text{C}$  NMR (101 MHz,  $\text{CDCl}_3$ )  $\delta$  145.8, 136.7, 136.6, 133.5, 132.0, 131.5, 130.5, 129.2, 128.9, 128.8, 128.8, 128.7, 128.4, 122.7, 121.7, 117.7, 110.7, 95.2, 87.3. HRMS (ESI-TOF)  $m/z$ :  $[\text{M}+\text{Na}]^+$  Calcd for  $\text{C}_{23}\text{H}_{14}\text{NNaCl}^+$  361.5480; Found 361.5482.

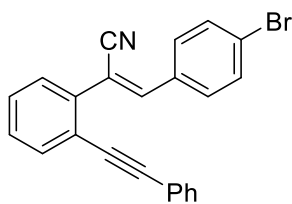

**(Z)-3-(4-bromophenyl)-2-(2-(phenylethynyl)phenyl)acrylonitrile (1d)**

Purified by column chromatography using petroleum ether/ ethyl acetate (10:1, V/V) as an eluent. Pale yellow solid; m.p.: 91-93 °C; yield: 2.88g (75%); <sup>1</sup>H NMR (400 MHz, CDCl<sub>3</sub>) δ 7.80-7.75 (m, 2H), 7.66-7.58 (m, 4H), 7.55-7.52 (m, 1H), 7.48-7.46 (m, 2H), 7.43-7.37 (m, 2H), 7.34-7.28 (m, 3H). <sup>13</sup>C NMR (101 MHz, CDCl<sub>3</sub>) δ 145.8, 136.6, 133.5, 132.4, 132.2, 131.5, 130.6, 128.9, 128.8, 128.7, 128.4, 125.1, 122.6, 121.6, 117.7, 110.9, 95.2, 87.3. HRMS (ESI-TOF) m/Z: [M+Na]<sup>+</sup> Calcd for C<sub>23</sub>H<sub>14</sub>NNaBr<sup>+</sup>, 406.0207; Found, 406.0199.

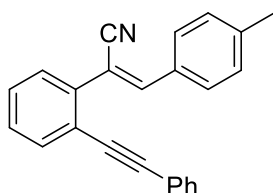

**(Z)-2-(2-(phenylethynyl)phenyl)-3-(p-tolyl)acrylonitrile (1e)**

Purified by column chromatography using petroleum ether/ ethyl acetate (10:1, V/V) as an eluent. Purified by column chromatography using petroleum ether/ ethyl acetate (5:1, V/V) as an eluent. Pale yellow solid; m.p.: 108-110 °C; yield: 2.24 g (70%); <sup>1</sup>H NMR (400 MHz, CDCl<sub>3</sub>) δ 7.84-7.82 (m, 2H), 7.64-7.62 (m, 2H), 7.54-7.47 (m, 3H), 7.41-7.33 (m, 2H), 7.32-7.26 (m, 5H), 2.41 (s, 3H). <sup>13</sup>C NMR (101 MHz, CDCl<sub>3</sub>) δ 147.4, 141.3, 137.2, 133.4, 131.5, 130.9, 129.7, 129.4, 128.9, 128.8, 128.6, 128.5, 128.4, 122.8, 121.6, 118.2, 108.9, 95.1, 87.5, 21.6. HRMS (ESI-TOF) m/Z: [M+Na]<sup>+</sup> Calcd for C<sub>24</sub>H<sub>17</sub>NNa<sup>+</sup>, 342.1259; Found, 342.1262.

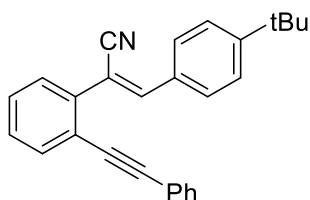

**(Z)-3-(4-(tert-butyl)phenyl)-2-(2-(phenylethynyl)phenyl)acrylonitrile (1f)**

Purified by column chromatography using petroleum ether/ ethyl acetate (10:1, V/V) as an eluent. Pale yellow solid; m.p.: 74-76 °C; yield: 2.60 g (70%); <sup>1</sup>H NMR (400

MHz, CDCl<sub>3</sub>) δ 7.88-7.85 (m, 2H), 7.63-7.61 (m, 2H), 7.52-7.46 (m, 5H), 7.38-7.34 (m, 2H), 7.31-7.27 (m, 3H), 1.34 (s, 9H). <sup>13</sup>C NMR (101 MHz, CDCl<sub>3</sub>) δ 147.4, 141.3, 137.2, 133.4, 131.5, 130.9, 129.7, 129.4, 128.9, 128.8, 128.6, 128.5, 128.4, 122.8, 121.6, 118.2, 108.9, 95.1, 87.5, 21.6. HRMS (ESI-TOF) m/Z: [M+Na]<sup>+</sup> Calcd for C<sub>27</sub>H<sub>23</sub>NNa<sup>+</sup> 384.1728; Found 384.1725.

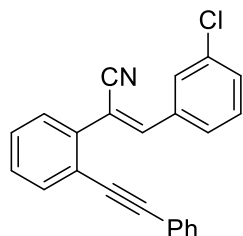

**(Z)-3-(3-chlorophenyl)-2-(2-(phenylethynyl)phenyl)acrylonitrile (1g)**

Purified by column chromatography using petroleum ether/ ethyl acetate (10:1, V/V) as an eluent. Pale yellow solid; m.p.: 96-98 °C; yield: 2.51 g (74%); <sup>1</sup>H NMR (400 MHz, CDCl<sub>3</sub>) δ 7.86-7.81 (m, 2H), 7.67-7.62 (m, 2H), 7.56-7.46 (m, 3H), 7.44-7.37 (m, 4H), 7.36-7.28 (m, 3H). <sup>13</sup>C NMR (101 MHz, CDCl<sub>3</sub>) δ 145.5, 136.4, 135.3, 134.9, 133.5, 131.5, 130.6, 130.2, 129.3, 129.0, 128.9, 128.8, 128.7, 128.4, 127.0, 122.6, 121.7, 117.4, 111.8, 95.3, 87.2. HRMS (ESI-TOF) m/Z: [M+Na]<sup>+</sup> Calcd for C<sub>23</sub>H<sub>14</sub>NNaCl<sup>+</sup> 361.5480; Found 361.5482.

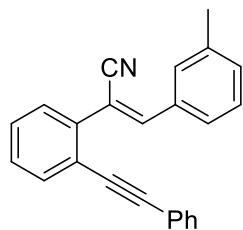

**(Z)-2-(2-(phenylethynyl)phenyl)-3-(m-tolyl)acrylonitrile (1h)**

Purified by column chromatography using petroleum ether/ ethyl acetate (10:1, V/V) as an eluent. Pale yellow solid; m.p.: 64-66 °C; yield: 2.56 g (80%); <sup>1</sup>H NMR (400 MHz, CDCl<sub>3</sub>) δ 7.96-7.89 (m, 2H), 7.69 (s, 1H), 7.65-7.61 (m, 1H), 7.55-7.53 (m, 1H), 7.49-7.43 (m, 3H), 7.42-7.34 (m, 2H), 7.29-7.26 (m, 2H), 7.19-7.15 (m, 1H), 7.13-7.09 (m, 1H), 2.26 (s, 3H). <sup>13</sup>C NMR (101 MHz, CDCl<sub>3</sub>) δ 147.4, 138.0, 137.0, 133.6, 133.4, 132.8, 130.7, 129.5, 129.4, 128.9, 128.9, 128.7, 128.6, 128.3, 122.6, 121.8, 118.0, 110.0, 95.3, 87.2, 21.2. HRMS (ESI-TOF) m/Z: [M+Na]<sup>+</sup> Calcd for C<sub>24</sub>H<sub>17</sub>NNa<sup>+</sup> 342.1259; Found 342.1262.

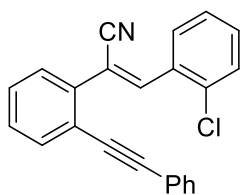

**(Z)-3-(2-chlorophenyl)-2-(2-(phenylethynyl)phenyl)acrylonitrile (1i)**

Purified by column chromatography using petroleum ether/ ethyl acetate (10:1, V/V) as an eluent. Pale yellow solid; m.p.: 92-94 °C; yield: 2.48 g (73%); <sup>1</sup>H NMR (400 MHz, CDCl<sub>3</sub>) δ 8.24-8.19 (m, 1H), 8.04 (s, 1H), 7.69-7.64 (m, 1H), 7.59-7.56 (m, 1H), 7.53-7.49 (m, 2H), 7.47-7.45 (m, 1H), 7.43-7.38 (m, 4H), 7.36-7.27 (m, 3H). <sup>13</sup>C NMR (101 MHz, CDCl<sub>3</sub>) δ 143.7, 136.2, 134.7, 133.6, 132.1, 131.6, 131.4, 129.9, 129.4, 129.0, 128.8, 128.6, 128.3, 127.2, 122.8, 121.8, 117.2, 113.5, 95.4, 87.1. HRMS (ESI-TOF) m/Z: [M+Na]<sup>+</sup> Calcd for C<sub>23</sub>H<sub>14</sub>NNaCl<sup>+</sup> 361.5480; Found 361.5482.

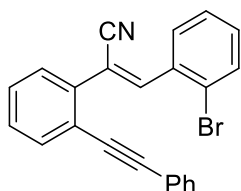

**(Z)-3-(2-bromophenyl)-2-(2-(phenylethynyl)phenyl)acrylonitrile(1j)**

Purified by column chromatography using petroleum ether/ ethyl acetate (10:1, V/V) as an eluent. Pale yellow solid; m.p.: 103-104 °C; yield: 2.79 g (73%); <sup>1</sup>H NMR (400 MHz, CDCl<sub>3</sub>) δ 8.11-8.08 (m, 1H), 7.91 (s, 1H), 7.64-7.58 (m, 2H), 7.55-7.44 (m, 3H), 7.42-7.34 (m, 3H), 7.30-7.21 (m, 4H). <sup>13</sup>C NMR (101 MHz, CDCl<sub>3</sub>) δ 146.2, 136.1, 133.9, 133.6, 133.1, 131.7, 131.6, 131.6, 129.7, 129.1, 129.1, 128.8, 128.6, 128.3, 128.3, 127.8, 124.9, 122.8, 121.9, 117.1, 113.7, 95.5, 87.1. HRMS (ESI-TOF) m/Z: [M+Na]<sup>+</sup> Calcd for C<sub>23</sub>H<sub>14</sub>NNaBr<sup>+</sup> 407.2650; Found 407.2652.

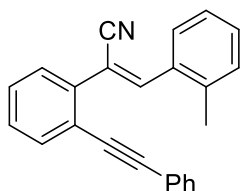

**(Z)-2-(2-(phenylethynyl)phenyl)-3-(o-tolyl)acrylonitrile (1k)**

Purified by column chromatography using petroleum ether/ ethyl acetate (10:1, V/V) as an eluent. Pale yellow solid; m.p.: 119-121 °C; yield: 2.52 g (79%); <sup>1</sup>H NMR (400 MHz, CDCl<sub>3</sub>) δ 7.99-7.96 (m, 1H), 7.83 (s, 1H), 7.60-7.56 (m, 1H), 7.50-7.47 (m, 1H),

7.43-7.38 (m, 2H), 7.36-7.28 (m, 2H), 7.28-7.19 (m, 5H), 7.16-7.14 (m, 1H), 2.25 (s, 3H). <sup>13</sup>C NMR (101 MHz, CDCl<sub>3</sub>) δ 146.3, 137.6, 136.8, 133.6, 133.0, 131.5, 130.5, 130.3, 129.0, 128.8, 128.8, 128.6, 128.4, 128.0, 126.4, 122.8, 121.7, 117.7, 112.3, 95.0, 87.5, 20.0. HRMS (ESI-TOF) m/Z: [M+Na]<sup>+</sup> Calcd for C<sub>24</sub>H<sub>17</sub>NNa<sup>+</sup> 342.1259; Found 342.1262.

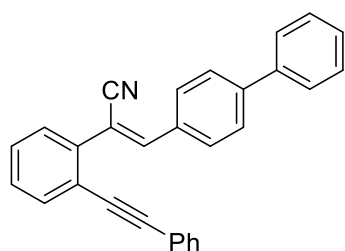

**(Z)-3-([1,1'-biphenyl]-4-yl)-2-(2-(phenylethynyl)phenyl)acrylonitrile (1l)**

Purified by column chromatography using petroleum ether/ ethyl acetate (10:1, V/V) as an eluent. Pale yellow solid; m.p.: 108-110 °C; yield: 2.67 g (70%); <sup>1</sup>H NMR (400 MHz, CDCl<sub>3</sub>) δ 8.01-7.99 (m, 2H), 7.71-7.62 (m, 6H), 7.56-7.55 (m, 1H), 7.52-7.45 (m, 4H), 7.43-7.36 (m, 3H), 7.31-7.29 (m, 3H). <sup>13</sup>C NMR (101 MHz, CDCl<sub>3</sub>) δ 146.8, 143.4, 139.9, 137.0, 133.5, 132.5, 131.5, 129.9, 128.9, 128.9, 128.8, 128.7, 128.6, 128.4, 128.0, 127.7, 127.5, 127.3, 127.1, 122.8, 121.7, 118.1, 109.8, 95.2, 87.5. HRMS (ESI-TOF) m/Z: [M+Na]<sup>+</sup> Calcd for C<sub>29</sub>H<sub>19</sub>NNa<sup>+</sup> 404.1415; Found 404.1412.

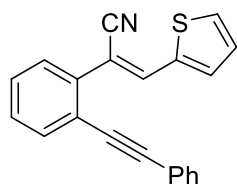

**(Z)-2-(2-(phenylethynyl)phenyl)-3-(thiophen-2-yl)acrylonitrile (1m)**

Purified by column chromatography using petroleum ether/ ethyl acetate (10:1, V/V) as an eluent. Pale yellow solid; m.p.: 59-61 °C; yield: 2.02 g (65%); <sup>1</sup>H NMR (400 MHz, CDCl<sub>3</sub>) δ 7.90 (s, 1H), 7.66-7.61 (m, 2H), 7.56-7.50 (m, 4H), 7.40-7.29 (m, 5H), 7.15-7.12 (m, 1H). <sup>13</sup>C NMR (101 MHz, CDCl<sub>3</sub>) δ 139.3, 137.7, 136.2, 133.6, 132.6, 131.5, 130.4, 128.8, 128.7, 128.5, 128.4, 127.9, 122.8, 121.4, 118.2, 106.8, 95.3, 87.6. HRMS (ESI-TOF) m/Z: [M+Na]<sup>+</sup> Calcd for C<sub>21</sub>H<sub>13</sub>NNaS<sup>+</sup> 334.0666; Found 334.0666.

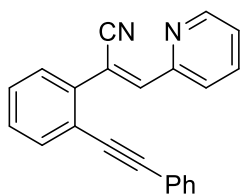

**(Z)-2-(2-(phenylethynyl)phenyl)-3-(pyridin-2-yl)acrylonitrile (1n)**

Purified by column chromatography using petroleum ether/ ethyl acetate (10:1, V/V) as an eluent. Pale yellow solid; m.p.: 67-69 °C; yield: 2.45 g (80%); <sup>1</sup>H NMR (400 MHz, CDCl<sub>3</sub>) δ 8.77-8.76 (m, 1H), 7.93-7.91 (m, 1H), 7.80-7.76 (m, 2H), 7.64-7.58 (m, 2H), 7.53-7.51 (m, 2H), 7.43-7.37 (m, 2H), 7.33-7.27 (m, 4H). <sup>13</sup>C NMR (101 MHz, CDCl<sub>3</sub>) δ 152.1, 150.0, 146.1, 136.8, 136.5, 133.5, 131.6, 129.1, 128.8, 128.6, 128.3, 124.4, 124.2, 122.7, 121.8, 117.4, 113.5, 95.4, 87.3. HRMS (ESI-TOF) m/Z: [M+H]<sup>+</sup> Calcd for C<sub>22</sub>H<sub>15</sub>N<sub>2</sub><sup>+</sup> 307.1235; Found 307.1240.

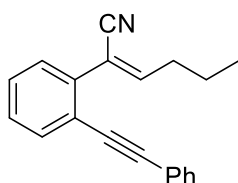

**(Z)-2-(2-(phenylethynyl)phenyl)hex-2-enenitrile (1o)**

Purified by column chromatography using petroleum ether/ ethyl acetate (10:1, V/V) as an eluent. Yellow oily liquid; yield: 1.79 g (66%); <sup>1</sup>H NMR (400 MHz, CDCl<sub>3</sub>) δ 7.60-7.54 (m, 3H), 7.41-7.33 (m, 6H), 6.95 (t, *J* = 7.6 Hz, 1H), 2.60 (q, *J* = 7.6 Hz, 2H), 1.65-1.55 (m, 2H), 1.02 (t, *J* = 7.2 Hz, 3H). <sup>13</sup>C NMR (101 MHz, CDCl<sub>3</sub>) δ 152.5, 135.8, 133.3, 131.5, 128.7, 128.6, 128.6, 128.4, 128.4, 122.9, 121.4, 116.6, 114.8, 94.7, 87.4, 34.1, 21.9, 13.6. HRMS (ESI-TOF) m/Z: [M+Na]<sup>+</sup> Calcd for C<sub>20</sub>H<sub>17</sub>NNa<sup>+</sup> 294.1259; Found 294.1264.

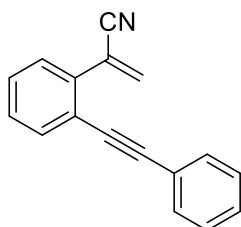

**2-(2-(phenylethynyl)phenyl)acrylonitrile (1p)**

Purified by column chromatography using petroleum ether/ ethyl acetate (10:1, V/V) as an eluent. Yellow liquid; yield: 0.92 g (40%); <sup>1</sup>H NMR (400 MHz, CDCl<sub>3</sub>) δ 7.92-

7.54 (m, 3H), 7.46-7.42 (m, 1H), 7.38-7.33 (m, 5H), 6.50 (s, 1H), 6.34 (s, 1H).  $^{13}\text{C}$  NMR (101 MHz,  $\text{CDCl}_3$ )  $\delta$  134.8, 134.0, 133.4, 131.6, 129.3, 128.8, 128.8, 128.6, 128.5, 122.7, 122.3, 121.3, 117.8, 95.5, 87.1. HRMS (ESI-TOF)  $m/z$ :  $[\text{M}+\text{Na}]^+$  Calcd for  $\text{C}_{17}\text{H}_{11}\text{NNa}^+$  252.0786; Found 252.0781.

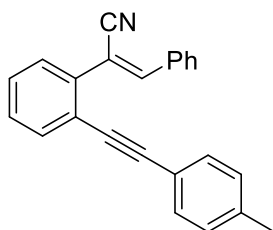

**(Z)-3-phenyl-2-(2-(p-tolylethynyl)phenyl)acrylonitrile (1q)**

Purified by column chromatography using petroleum ether/ ethyl acetate (10:1, V/V) as an eluent. Pale yellow solid; m.p.: 81-83 °C; yield: 2.39 g (75%);  $^1\text{H}$  NMR (400 MHz,  $\text{CDCl}_3$ )  $\delta$  7.93-7.91 (m, 2H), 7.71 (s, 1H), 7.65-7.62 (m, 1H), 7.56-7.53 (m, 1H), 7.50-7.45 (m, 3H), 7.42-7.35 (m, 4H), 7.12 (d,  $J = 7.6$  Hz, 2H), 2.34 (s, 3H).  $^{13}\text{C}$  NMR (101 MHz,  $\text{CDCl}_3$ )  $\delta$  147.3, 138.8, 136.9, 133.6, 133.4, 131.4, 130.7, 129.3, 129.2, 128.9, 128.9, 128.7, 128.6, 121.9, 119.7, 118.0, 110.2, 95.4, 86.8, 21.5. HRMS (ESI-TOF)  $m/z$ :  $[\text{M}+\text{Na}]^+$  Calcd for  $\text{C}_{24}\text{H}_{17}\text{NNa}^+$  342.1259; Found 342.1262.

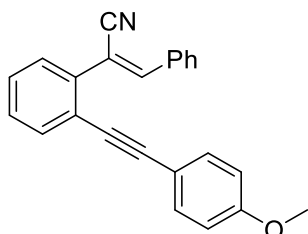

**(Z)-2-(2-((4-methoxyphenyl)ethynyl)phenyl)-3-phenylacrylonitrile (1r)**

Purified by column chromatography using petroleum ether/ ethyl acetate (10:1, V/V) as an eluent. Pale yellow solid; m.p.: 59-61 °C; yield: 2.68 g (80%);  $^1\text{H}$  NMR (400 MHz,  $\text{CDCl}_3$ )  $\delta$  7.94-7.91 (m, 2H), 7.69 (s, 1H), 7.64-7.61 (m, 1H), 7.55-7.35 (m, 8H), 6.84 (d,  $J = 8.4$  Hz, 2H), 3.80 (s, 3H).  $^{13}\text{C}$  NMR (101 MHz,  $\text{CDCl}_3$ )  $\delta$  159.9, 147.2, 136.7, 133.6, 133.2, 133.0, 130.7, 129.3, 129.0, 128.9, 128.7, 128.4, 122.1, 118.0, 114.9, 114.1, 110.3, 95.4, 86.3, 55.3. HRMS (ESI-TOF)  $m/z$ :  $[\text{M}+\text{Na}]^+$  Calcd for  $\text{C}_{24}\text{H}_{17}\text{NONa}^+$  358.1208; Found 358.1211.

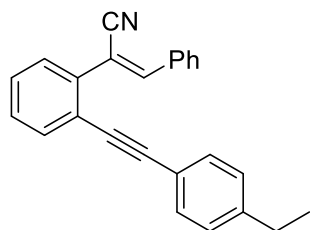

**(Z)-2-(2-((4-ethylphenyl)ethynyl)phenyl)-3-phenylacrylonitrile (1s)**

Purified by column chromatography using petroleum ether/ ethyl acetate (10:1, V/V) as an eluent. Pale yellow solid; m.p.: 56-57 °C; yield: 2.13 mg (64%); <sup>1</sup>H NMR (400 MHz, CDCl<sub>3</sub>) δ 7.73-7.71 (m, 2H), 7.50 (s, 1H), 7.45-7.42 (m, 1H), 7.36-7.33 (m, 1H), 7.30-7.24 (m, 3H), 7.22-7.14 (m, 4H), 6.93 (d, *J* = 8.4 Hz, 2H), 2.43 (q, *J* = 7.6 Hz, 2H), 1.02 (t, *J* = 7.6 Hz, 3H). <sup>13</sup>C NMR (101 MHz, CDCl<sub>3</sub>) δ 147.3, 145.1, 136.8, 133.6, 133.4, 131.5, 130.7, 129.9, 129.3, 129.0, 128.9, 128.9, 128.7, 128.6, 128.0, 121.9, 119.9, 118.0, 110.2, 95.4, 86.8, 28.8, 15.3. HRMS (ESI-TOF) *m/z*: [M+Na]<sup>+</sup> Calcd for C<sub>25</sub>H<sub>19</sub>NNa<sup>+</sup> 356.1410; Found 356.1414.

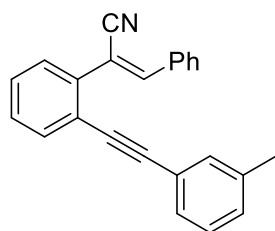

**(Z)-3-phenyl-2-(2-(*m*-tolylethynyl)phenyl)acrylonitrile (1t)**

Purified by column chromatography using petroleum ether/ ethyl acetate (10:1, V/V) as an eluent. Pale yellow solid; m.p.: 93-95 °C; yield: 54.7 mg (80%); <sup>1</sup>H NMR (400 MHz, CDCl<sub>3</sub>) δ 7.95-7.93 (m, 2H), 7.72 (s, 1H), 7.66-7.63 (m, 1H), 7.58-7.2. (m, 1H), 7.51-7.46 (m, 3H), 7.44-7.36 (m, 2H), 7.31-7.28 (m, 1H), 7.19 (t, *J* = 7.6 Hz, 1H), 7.14-7.12 (m, 2H), 2.34 (s, 3H). <sup>13</sup>C NMR (101 MHz, CDCl<sub>3</sub>) δ 147.4, 138.1, 137.0, 133.6, 133.4, 132.1, 130.7, 129.5, 129.4, 128.9, 128.9, 128.7, 128.6, 128.3, 122.6, 121.8, 118.0, 110.0, 95.3, 87.2, 21.2. HRMS (ESI-TOF) *m/z*: [M+Na]<sup>+</sup> Calcd for C<sub>24</sub>H<sub>17</sub>NNa<sup>+</sup> 342.1257; Found 342.1262.

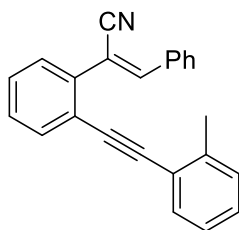

**(Z)-3-phenyl-2-(2-(*o*-tolylethynyl)phenyl)acrylonitrile (1u)**

Purified by column chromatography using petroleum ether/ ethyl acetate (10:1, V/V) as an eluent. Pale yellow solid; m.p.: 61-62 °C; yield: 56.1 mg (82%); <sup>1</sup>H NMR (400 MHz, CDCl<sub>3</sub>) δ 7.94-7.92 (m, 2H), 7.69-7.67 (m, 2H), 7.59-7.57 (m, 1H), 7.51-7.39 (m, 6H), 7.27-7.12 (m, 3H), 2.43 (s, 3H). <sup>13</sup>C NMR (101 MHz, CDCl<sub>3</sub>) δ 147.3, 140.1, 136.8, 133.6, 133.6, 132.0, 130.7, 129.5, 129.3, 128.9, 128.9, 128.7, 128.7, 128.6, 125.6, 122.6, 122.0, 118.0, 110.2, 94.0, 91.2, 20.7. HRMS (ESI-TOF) m/Z: [M+Na]<sup>+</sup> Calcd for C<sub>24</sub>H<sub>17</sub>NNa<sup>+</sup> 342.1258; Found 342.1262.

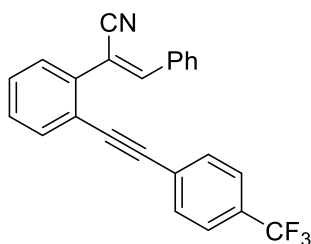

**(Z)-3-phenyl-2-(2-(4-(trifluoromethyl)phenyl)ethynyl)phenyl)acrylonitrile(1v)**

Purified by column chromatography using petroleum ether/ ethyl acetate (10:1, V/V) as an eluent. Pale yellow solid; m.p.: 73-75 °C; yield: 49.2 mg (68%); <sup>1</sup>H NMR (400 MHz, CDCl<sub>3</sub>) δ 7.93-7.91 (m, 2H), 7.66-7.64 (m, 1H), 7.60-7.52 (m, 6H), 7.50-7.37 (m, 5H). <sup>13</sup>C NMR (101 MHz, CDCl<sub>3</sub>) δ 147.6, 137.4, 133.5, 133.4, 131.7, 130.9, 130.3 (q, *J* = 32.5 Hz), 129.4, 129.3, 129.0, 129.0, 128.9, 126.6, 126.6, 125.3 (q, *J* = 3.8 Hz), 123.9 (q, *J* = 270.5 Hz), 122.5, 121.1, 117.8, 110.0, 93.7, 89.6. <sup>19</sup>F NMR (376 MHz, CDCl<sub>3</sub>) δ -62.80. HRMS (ESI-TOF) m/Z: [M+Na]<sup>+</sup> Calcd for C<sub>24</sub>H<sub>14</sub>NNaF<sub>3</sub><sup>+</sup> 396.0976; Found 396.0981.

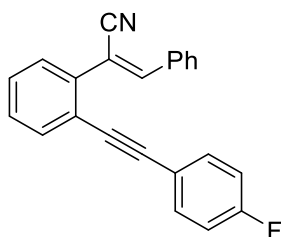

**(Z)-2-(2-(4-fluorophenyl)ethynyl)phenyl)-3-phenylacrylonitrile (1w)**

Purified by column chromatography using petroleum ether/ ethyl acetate (10:1, V/V) as an eluent. Pale yellow solid; m.p.: 86-88 °C; yield: 53.1 mg (77%); <sup>1</sup>H NMR (400 MHz, CDCl<sub>3</sub>) δ 7.93-7.91 (m, 2H), 7.65-7.62 (m, 2H), 7.55-7.45 (m, 6H), 7.44-7.36 (m, 2H), 7.03-6.97 (m, 2H). <sup>13</sup>C NMR (101 MHz, CDCl<sub>3</sub>) δ 162.7 (d, *J* = 248.5 Hz), 147.4, 137.1, 133.5, 133.5 (d, *J* = 8.4 Hz), 133.3, 130.8, 129.3, 129.0, 128.9, 128.8, 128.8, 121.6, 118.9 (d, *J* = 3.4 Hz), 117.8, 115.7 (d, *J* = 21.9 Hz), 110.2, 94.2, 87.1. <sup>19</sup>F NMR (376 MHz, CDCl<sub>3</sub>) δ -110.20. HRMS (ESI-TOF) *m/z*: [M+Na]<sup>+</sup> Calcd for C<sub>23</sub>H<sub>14</sub>NNaF<sup>+</sup> 345.0962; Found 345.0966.

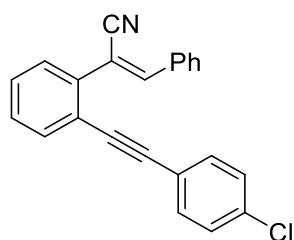

**(Z)-2-(2-((4-chlorophenyl)ethynyl)phenyl)-3-phenylacrylonitrile (1x)**

Purified by column chromatography using petroleum ether/ ethyl acetate (10:1, V/V) as an eluent. Pale yellow solid; m.p.: 103-105 °C; yield: 52.7 mg (73%); <sup>1</sup>H NMR (400 MHz, CDCl<sub>3</sub>) δ 7.93-7.91 (m, 2H), 7.65-7.61 (m, 2H), 7.55-7.52 (m, 1H), 7.51-7.46 (m, 3H), 7.45-7.37 (m, 4H), 7.30-7.26 (m, 2H). <sup>13</sup>C NMR (101 MHz, CDCl<sub>3</sub>) δ 147.4, 137.2, 134.7, 133.5, 133.4, 132.7, 130.8, 129.3, 129.0, 128.9, 128.8, 128.7, 121.5, 121.3, 117.8, 110.6, 94.1, 88.3. HRMS (ESI-TOF) *m/z*: [M+Na]<sup>+</sup> Calcd for C<sub>23</sub>H<sub>14</sub>NNaCl<sup>+</sup> 361.5489; Found 361.5482.

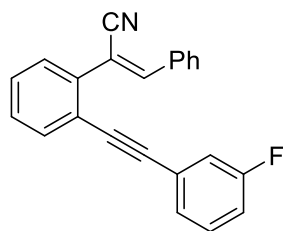

**(Z)-2-(2-((3-fluorophenyl)ethynyl)phenyl)-3-phenylacrylonitrile (1y)**

Purified by column chromatography using petroleum ether/ ethyl acetate (10:1, V/V) as an eluent. Pale yellow solid; m.p.: 68-70 °C; yield: 53.1 mg (77%); <sup>1</sup>H NMR (400 MHz, CDCl<sub>3</sub>) δ 7.82-7.77 (m, 2H), 7.53-7.48 (m, 2H), 7.42-7.24 (m, 6H), 7.17-7.06 (m, 3H), 6.92-6.90 (m, 1H). <sup>13</sup>C NMR (101 MHz, CDCl<sub>3</sub>) δ 163.4 (d, *J* = 245.3 Hz), 148.2, 147.5, 137.3, 133.5, 133.5, 130.9, 130.1 (d, *J* = 8.6 Hz), 129.3, 129.3, 129.2, 129.0,

129.02, 128.8, 127.5 (d,  $J = 3.0$  Hz), 124.6 (d,  $J = 9.4$  Hz), 121.3, 118.3 (d,  $J = 22.7$  Hz), 117.9, 116.0 (d,  $J = 21.1$  Hz), 110.0, 93.9, 93.9, 88.2.  $^{19}\text{F}$  NMR (376 MHz,  $\text{CDCl}_3$ )  $\delta$  -112.53. HRMS (ESI-TOF)  $m/z$ :  $[\text{M}+\text{Na}]^+$  Calcd for  $\text{C}_{23}\text{H}_{14}\text{NNaF}^+$  345.0962; Found 345.0966.

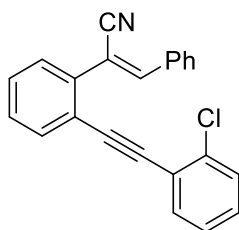

**(Z)-2-(2-((2-chlorophenyl)ethynyl)phenyl)-3-phenylacrylonitrile (1z)**

Purified by column chromatography using petroleum ether/ ethyl acetate (10:1, V/V) as an eluent. Pale yellow solid; m.p.: 82-84 °C; yield: 52.7 mg (73%);  $^1\text{H}$  NMR (400 MHz,  $\text{CDCl}_3$ )  $\delta$  7.93-7.91 (m, 2H), 7.73-7.70 (m, 2H), 7.59-7.58 (m, 1H), 7.54-7.51 (m, 1H), 7.50-7.36 (m, 6H), 7.27-7.17 (m, 2H).  $^{13}\text{C}$  NMR (101 MHz,  $\text{CDCl}_3$ )  $\delta$  147.6, 137.0, 135.8, 133.9, 133.7, 133.4, 130.7, 129.6, 129.3, 129.2, 129.1, 128.9, 128.9, 128.7, 126.5, 122.8, 121.3, 118.0, 110.0, 92.3, 91.6. HRMS (ESI-TOF)  $m/z$ :  $[\text{M}+\text{Na}]^+$  Calcd for  $\text{C}_{23}\text{H}_{14}\text{NNaCl}^+$  361.5489; Found 361.5482.

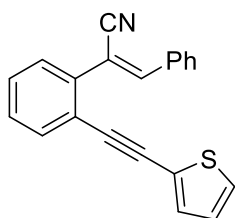

**(Z)-3-phenyl-2-(2-(thiophen-2-ylethynyl)phenyl)acrylonitrile (1aa)**

Purified by column chromatography using petroleum ether/ ethyl acetate (10:1, V/V) as an eluent. Pale yellow solid; m.p.: 52-54 °C; yield: 46.8 mg (70%);  $^1\text{H}$  NMR (400 MHz,  $\text{CDCl}_3$ )  $\delta$  7.93-7.92 (m, 2H), 7.70 (s, 1H), 7.64-7.61 (m, 1H), 7.58-7.55 (m, 1H), 7.51-7.45 (m, 3H), 7.44-7.35 (m, 2H), 7.29-7.23 (m, 2H), 6.99-6.97 (m, 1H).  $^{13}\text{C}$  NMR (101 MHz,  $\text{CDCl}_3$ )  $\delta$  147.4, 136.7, 133.5, 133.1, 132.3, 130.7, 129.3, 128.9, 128.9, 128.9, 128.7, 127.9, 127.2, 122.7, 121.3, 117.9, 109.9, 91.2, 88.4. HRMS (ESI-TOF)  $m/z$ :  $[\text{M}+\text{Na}]^+$  Calcd for  $\text{C}_{21}\text{H}_{13}\text{NNaS}^+$  334.0670; Found 334.0666.

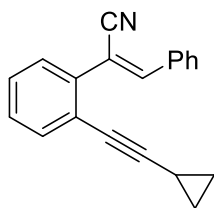

### (Z)-2-(2-(cyclopropylethynyl)phenyl)-3-phenylacrylonitrile (**1ab**)

Purified by column chromatography using petroleum ether/ ethyl acetate (10:1, V/V) as an eluent. Pale yellow solid; m.p.: 67-69 °C; yield: 46.8 mg (70%); <sup>1</sup>H NMR (400 MHz, CDCl<sub>3</sub>) δ 7.91-7.88 (m, 2H), 7.51 (s, 1H), 7.50-7.45 (m, 5H), 7.35-7.27 (m, 2H), 1.49-1.42 (m, 1H), 0.87-0.78 (m, 4H). <sup>13</sup>C NMR (101 MHz, CDCl<sub>3</sub>) δ 146.4, 136.5, 133.2, 133.0, 130.2, 128.8, 128.5, 128.3, 128.1, 127.5, 122.0, 117.4, 109.9, 99.5, 73.4, 8.3. HRMS (ESI-TOF) m/Z: [M+H]<sup>+</sup> Calcd for C<sub>20</sub>H<sub>16</sub>N<sup>+</sup> 270.1277; Found 270.1283.

## 3. Experimental section and analytical data of compound 3

### 3.1 General procedure for the preparation of **3** (**3aa** as example).<sup>[3]</sup>

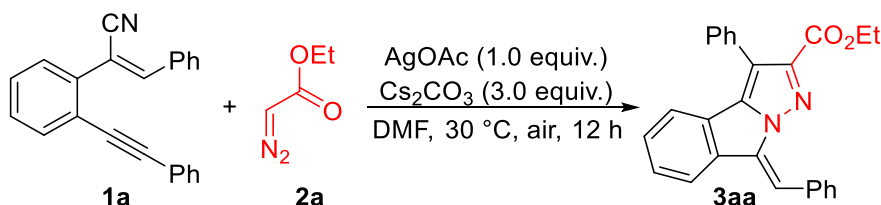

A 35 mL sealed tube equipped with a magnetic stir bar was charged with **1a** (0.2 mmol, 61.1 mg), ethyl diazoacetate (0.4 mmol, 42 μL), AgOAc (0.2 mmol, 33.4 mg), and Cs<sub>2</sub>CO<sub>3</sub> (0.6 mmol, 195.5 mg) in DMF (3.0 mL). The reaction mixture was stirred at 30 °C under air for 12 h. Upon completion (monitored by TLC), the solvent was extracted three times with CH<sub>2</sub>Cl<sub>2</sub>, and then the combined organic layers were washed three times with saturated brine. The aqueous phase was treated with NaClO(aq) to quench the formed cyanide by-products. Then, the combined organic layers were dried with anhydrous MgSO<sub>4</sub>, filtered, and evaporated in vacuo. The resulting crude residue was purified by silica gel column chromatography (EtOAc/petroleum ether = 1:10, v/v) to afford the pure product **3aa** (62.0 mg, 79%) as a yellow solid.

### 3.2 A gram-scale synthesis of compound **3aa**:

A sealed tube (75 mL) equipped with a magnetic stir bar was charged with **1a** (4 mmol), ethyl diazoacetate (8 mmol), AgOAc (4 mmol), Cs<sub>2</sub>CO<sub>3</sub> (12 mmol), and DMF (0.1 M). The resulting mixture was stirred at 30 °C under air for 12 hours. Upon completion, the solvent was extracted three times with CH<sub>2</sub>Cl<sub>2</sub>, and then the combined organic layers were washed three times with saturated brine. The aqueous phase was treated with NaClO(aq) to quench the formed cyanide by-products. Then, the combined organic layers were dried with anhydrous MgSO<sub>4</sub>, filtered, and evaporated in vacuo. The resulting crude residue was purified by flash column chromatography on silica gel, eluting with ethyl acetate and petroleum ether, to afford product **3aa** (1.00 g, 64%) as a yellow solid.

### 3.3. Characterization Data of Compound **3**.

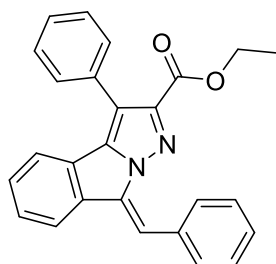

#### **Ethyl(Z)-8-benzylidene-3-phenyl-8H-pyrazolo[5,1-a]isoindole-2-carboxylate (3aa)**

Purified by column chromatography using petroleum ether/ ethyl acetate (10:1, V/V) as an eluent. Yellow solid; m.p.: 148-149 °C; yield: 62.0 mg (79%); <sup>1</sup>H NMR (400 MHz, CDCl<sub>3</sub>) δ 8.20 (d, *J* = 7.6 Hz, 2H), 7.53 (d, *J* = 7.6 Hz, 1H), 7.39 (d, *J* = 7.2 Hz, 2H), 7.30-7.12 (m, 8H), 7.07 (t, *J* = 7.6 Hz, 1H), 6.79 (s, 1H), 4.12 (q, *J* = 7.2 Hz, 2H), 1.11 (t, *J* = 7.2 Hz, 3H). <sup>13</sup>C NMR (101 MHz, CDCl<sub>3</sub>) δ 162.3, 144.2, 143.6, 137.3, 132.6, 131.2, 131.1, 130.5, 129.9, 129.4, 128.9, 128.3, 128.1, 128.0, 127.8, 127.4, 120.4, 120.2, 118.0, 115.0, 60.8, 14.0. HRMS (ESI-TOF) *m/z*: [M+Na]<sup>+</sup> calcd for C<sub>26</sub>H<sub>20</sub>N<sub>2</sub>O<sub>2</sub>Na<sup>+</sup> 415.1422; found 415.1426.

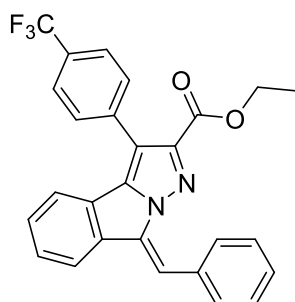

**Ethyl(*Z*)-8-benzylidene-3-(4-(trifluoromethyl)phenyl)-8*H*-pyrazolo[5,1-*a*]isoindole-2-carboxylate (3ab)**

Purified by column chromatography using petroleum ether/ ethyl acetate (10:1, V/V) as an eluent. Yellow solid; m.p.: 189-190 °C; yield: 77.2 mg (84%); <sup>1</sup>H NMR (400 MHz, CDCl<sub>3</sub>) δ 8.20 (d, *J* = 7.6 Hz, 2H), 7.55-7.49 (m, 5H), 7.33-7.28 (m, 2H), 7.26-7.22 (m, 1H), 7.19-7.15 (m, 2H), 7.12-7.08 (m, 1H), 6.77 (s, 1H), 4.16 (q, *J* = 7.2 Hz, 2H), 1.17 (t, *J* = 7.2 Hz, 3H). <sup>13</sup>C NMR (101 MHz, CDCl<sub>3</sub>) δ 162.1, 143.9, 143.7, 137.3, 135.1, 132.4, 131.3, 130.3, 130.2, 129.7 (q, *J* = 3.6 Hz), 129.6, 128.9, 128.3, 128.3, 126.8, 125.0 (q, *J* = 3.6 Hz), 124.3 (q, *J* = 270.5 Hz), 120.5, 120.0, 116.4, 115.6, 61.0, 14.0. <sup>19</sup>F NMR (376 MHz, CDCl<sub>3</sub>) δ -62.47. HRMS (ESI-TOF) *m/z*: [M+Na]<sup>+</sup> calcd for C<sub>27</sub>H<sub>19</sub>F<sub>3</sub>N<sub>2</sub>O<sub>2</sub>Na<sup>+</sup> 483.1296; found 483.1299.

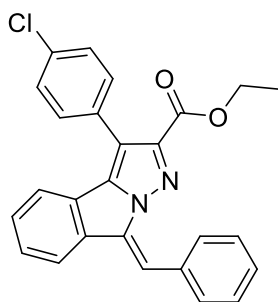

**Ethyl(*Z*)-8-benzylidene-3-(4-chlorophenyl)-8*H*-pyrazolo[5,1-*a*]isoindole-2-carboxylate (3ac)**

Purified by column chromatography using petroleum ether/ ethyl acetate (10:1, V/V) as an eluent. Yellow solid; m.p.: 186-187 °C; yield: 74.1 mg (87%); <sup>1</sup>H NMR (400 MHz, CDCl<sub>3</sub>) δ 8.23 (d, *J* = 7.6 Hz, 2H), 7.56 (d, *J* = 7.6 Hz, 1H), 7.40-7.19 (m, 9H), 7.15-7.11 (m, 1H), 6.83 (s, 1H), 4.18 (q, *J* = 7.2 Hz, 2H), 1.19 (t, *J* = 7.2 Hz, 3H). <sup>13</sup>C NMR (101 MHz, CDCl<sub>3</sub>) δ 162.2, 143.9, 143.6, 137.2, 133.7, 132.5, 131.3, 131.3, 130.4, 129.6, 129.5, 128.9, 128.3, 128.3, 128.1, 127.0, 120.4, 120.1, 116.7, 115.3, 60.9, 14.1. HRMS (ESI-TOF) *m/z*: [M+Na]<sup>+</sup> calcd for C<sub>26</sub>H<sub>19</sub>ClN<sub>2</sub>O<sub>2</sub>Na<sup>+</sup> 449.1033; found 449.1037.

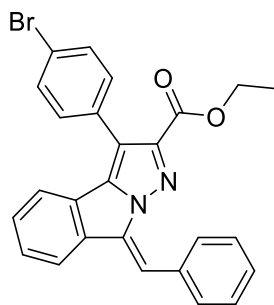

**Ethyl(Z)-8-benzylidene-3-(4-bromophenyl)-8H-pyrazolo[5,1-a]isoindole-2-carboxylate (3ad)**

Purified by column chromatography using petroleum ether/ ethyl acetate (10:1, V/V) as an eluent. Yellow solid; m.p.: 172-173 °C; yield: 74.2 mg (79%); <sup>1</sup>H NMR (400 MHz, CDCl<sub>3</sub>) δ 8.38 (d, *J* = 7.6 Hz, 2H), 7.69 (d, *J* = 7.6 Hz, 1H), 7.62-7.59 (m, 2H), 7.51-7.46 (m, 4H), 7.44-7.43 (m, 3H), 7.30-7.26 (m, 1H), 6.97 (s, 1H), 4.35 (q, *J* = 7.2 Hz, 2H), 1.36 (t, *J* = 7.2 Hz, 3H). <sup>13</sup>C NMR (101 MHz, CDCl<sub>3</sub>) δ 162.2, 143.9, 143.6, 137.3, 132.6, 131.7, 131.3, 131.3, 130.4, 130.1, 129.6, 128.9, 128.3, 128.2, 127.0, 121.9, 120.5, 120.1, 116.8, 115.4, 60.9, 14.2. HRMS (ESI-TOF) *m/z*: [M+Na]<sup>+</sup> calcd for C<sub>26</sub>H<sub>19</sub>BrN<sub>2</sub>O<sub>2</sub>Na<sup>+</sup> 493.0528; found 493.0531.

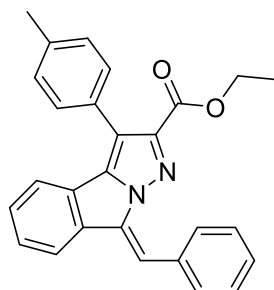

**Ethyl(Z)-8-benzylidene-3-(*p*-tolyl)-8H-pyrazolo[5,1-a]isoindole-2-carboxylate (3ae)**

Purified by column chromatography using petroleum ether/ ethyl acetate (10:1, V/V) as an eluent. Yellow solid; m.p.: 155-156 °C; yield: 62.5 mg (77%); <sup>1</sup>H NMR (400 MHz, CDCl<sub>3</sub>) δ 8.39 (d, *J* = 7.6 Hz, 2H), 7.68 (d, *J* = 7.6 Hz, 1H), 7.49-7.43 (m, 5H), 7.40-7.36 (m, 1H), 7.33-7.22 (m, 4H), 6.95 (s, 1H), 4.33 (q, *J* = 7.2 Hz, 2H), 2.42 (s, 3H), 1.34 (t, *J* = 7.2 Hz, 3H). <sup>13</sup>C NMR (101 MHz, CDCl<sub>3</sub>) δ 162.4, 144.2, 143.5, 137.5, 137.3, 132.7, 131.3, 130.6, 129.9, 129.4, 128.9, 128.9, 128.3, 128.0, 127.9, 127.5, 120.4, 120.2, 118.2, 114.9, 60.9, 21.4, 14.2. HRMS (ESI-TOF) *m/z*: [M+Na]<sup>+</sup> calcd for

C<sub>27</sub>H<sub>22</sub>N<sub>2</sub>O<sub>2</sub>Na<sup>+</sup> 429.1579; found 429.1582.

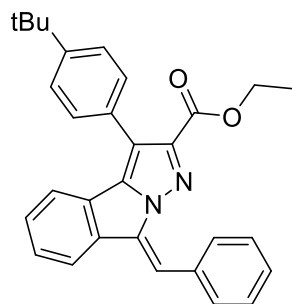

**Ethyl(Z)-8-benzylidene-3-(4-(*tert*-butyl)phenyl)-8H-pyrazolo[5,1-*a*]isoindole-2-carboxylate (3af)**

Purified by column chromatography using petroleum ether/ ethyl acetate (10:1, V/V) as an eluent. Yellow solid; m.p.: 165-166 °C; yield: 64.5 mg (72%); <sup>1</sup>H NMR (400 MHz, CDCl<sub>3</sub>) δ 8.38 (d, *J* = 7.6 Hz, 2H), 7.67 (d, *J* = 7.2 Hz, 1H), 7.55-7.53 (m, 2H), 7.49-7.44 (m, 5H), 7.40-7.36 (m, 1H), 7.33-7.24 (m, 2H), 6.95 (s, 1H), 4.33 (q, *J* = 7.2 Hz, 2H), 1.39 (s, 9H), 1.33 (t, *J* = 7.2 Hz, 3H). <sup>13</sup>C NMR (101 MHz, CDCl<sub>3</sub>) δ 162.5, 150.7, 144.2, 143.5, 137.3, 132.7, 131.3, 130.6, 129.6, 129.4, 128.9, 128.3, 127.9, 127.5, 125.0, 120.3, 120.3, 118.2, 114.8, 60.8, 34.7, 31.4, 14.1. HRMS (ESI-TOF) *m/z*: [M+Na]<sup>+</sup> calcd for C<sub>30</sub>H<sub>28</sub>N<sub>2</sub>O<sub>2</sub>Na<sup>+</sup> 471.2048; found 471.2051.

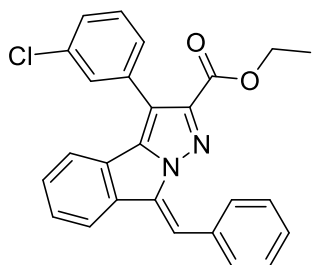

**Ethyl(Z)-8-benzylidene-3-(3-chlorophenyl)-8H-pyrazolo[5,1-*a*]isoindole-2-carboxylate (3ag)**

Purified by column chromatography using petroleum ether/ ethyl acetate (10:1, V/V) as an eluent. Yellow solid; m.p.: 147-148 °C; yield: 71.5 mg (84%); <sup>1</sup>H NMR (400 MHz, CDCl<sub>3</sub>) δ 8.31 (d, *J* = 7.6 Hz, 2H), 7.62 (d, *J* = 7.6 Hz, 1H), 7.54 (s, 1H), 7.44-7.40 (m, 3H), 7.36-7.31 (m, 4H), 7.30-7.26 (m, 1H), 7.24-7.19 (m, 1H), 6.90 (s, 1H), 4.28 (q, *J* = 7.2 Hz, 2H), 1.28 (t, *J* = 7.2 Hz, 3H). <sup>13</sup>C NMR (101 MHz, CDCl<sub>3</sub>) δ 162.1, 144.1, 143.7, 137.3, 133.9, 133.1, 132.5, 131.4, 130.3, 130.1, 129.6, 129.4, 129.0, 128.3, 128.2, 128.2, 127.8, 126.9, 120.5, 120.1, 116.4, 115.5, 61.0, 14.1. HRMS (ESI-TOF) *m/z*:

$[M+Na]^+$  calcd for  $C_{26}H_{19}ClN_2O_2Na^+$  449.1033; found 449.1036.

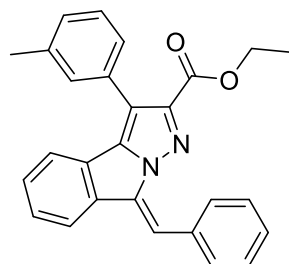

**Ethyl(Z)-8-benzylidene-3-(*m*-tolyl)-8H-pyrazolo[5,1-*a*]isoindole-2-carboxylate**

**(3ah)**

Purified by column chromatography using petroleum ether/ ethyl acetate (10:1, V/V) as an eluent. Yellow solid; m.p.: 120-121 °C; yield: 56.9 mg (70%);  $^1H$  NMR (400 MHz,  $CDCl_3$ )  $\delta$  8.34 (d,  $J = 7.2$  Hz, 2H), 7.64 (d,  $J = 7.6$  Hz, 1H), 7.44-7.40 (m, 2H), 7.38-7.29 (m, 5H), 7.28-7.24 (m, 1H), 7.22-7.20 (m, 1H), 7.18-7.14(m, 1H), 6.90 (s, 1H), 4.28 (q,  $J = 7.2$  Hz, 2H), 2.37 (s, 3H), 1.27 (t,  $J = 7.2$  Hz, 3H).  $^{13}C$  NMR (101 MHz,  $CDCl_3$ )  $\delta$  162.4, 144.3, 143.6, 137.6, 137.3, 132.7, 131.3, 131.0, 130.6, 130.5, 129.4, 128.9, 128.5, 128.3, 128.0, 127.9, 127.4, 127.1, 120.4, 120.2, 118.2, 115.0, 60.8, 21.6, 14.1. HRMS (ESI-TOF) m/Z:  $[M+Na]^+$  calcd for  $C_{27}H_{22}N_2O_2Na^+$  429.1579; found 429.1583.

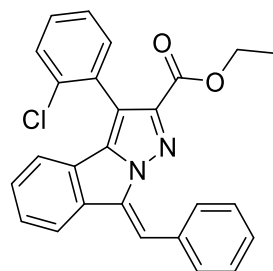

**Ethyl(Z)-8-benzylidene-3-(2-chlorophenyl)-8H-pyrazolo[5,1-*a*]isoindole-2-carboxylate (3ai)**

Purified by column chromatography using petroleum ether/ ethyl acetate (10:1, V/V) as an eluent. Yellow solid; m.p.: 138-139 °C; yield: 69.0 mg (81%);  $^1H$  NMR (400 MHz,  $CDCl_3$ )  $\delta$  8.42 (d,  $J = 7.6$  Hz, 2H), 7.73 (d,  $J = 8.0$  Hz, 1H), 7.57-7.4 (m, 4H), 7.44-7.33 (m, 4H), 7.30-7.26 (m, 1H), 7.21-7.18 (m, 1H), 7.03 (s, 1H), 4.30 (m, 2H), 1.26 (t,  $J = 7.2$  Hz, 3H).  $^{13}C$  NMR (101 MHz,  $CDCl_3$ )  $\delta$  162.1, 145.3, 144.3, 137.3, 134.4, 132.6, 131.9, 131.3, 130.8, 130.6, 129.6, 129.5, 129.3, 128.9, 128.4, 128.2, 127.1,

126.5, 120.6, 120.4, 115.4, 114.2, 60.9, 13.9. HRMS (ESI-TOF)  $m/z$ :  $[M+Na]^+$  calcd for  $C_{26}H_{19}ClN_2O_2Na^+$  449.1033; found 449.1036.

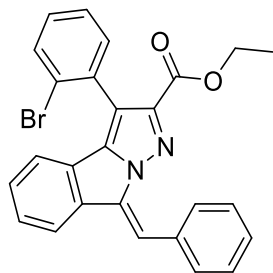

**Ethyl(Z)-8-benzylidene-3-(2-bromophenyl)-8H-pyrazolo[5,1-a]isoindole-2-carboxylate (3aj)**

Purified by column chromatography using petroleum ether/ ethyl acetate (10:1, V/V) as an eluent. Yellow solid; m.p.: 163-164 °C; yield: 68.8 mg (73%);  $^1H$  NMR (400 MHz,  $CDCl_3$ )  $\delta$  8.34 (d,  $J = 7.6$  Hz, 2H), 7.65 (d,  $J = 8.0$  Hz, 2H), 7.45-7.40 (m, 3H), 7.36-7.31 (m, 2H), 7.30-7.26 (m, 1H), 7.24-7.18 (m, 2H), 7.09 (d,  $J = 7.6$  Hz, 1H), 6.96 (s, 1H), 4.21 (m, 2H), 1.16 (t,  $J = 7.2$  Hz, 3H).  $^{13}C$  NMR (101 MHz,  $CDCl_3$ )  $\delta$  162.0, 145.2, 144.2, 137.3, 132.9, 132.7, 132.6, 131.8, 131.3, 130.6, 129.5, 129.5, 128.9, 128.4, 128.2, 127.1, 127.0, 124.8, 120.7, 120.4, 116.0, 115.5, 60.9, 13.9. HRMS (ESI-TOF)  $m/z$ :  $[M+Na]^+$  calcd for  $C_{26}H_{19}BrN_2O_2Na^+$  493.0528; found 493.0532.

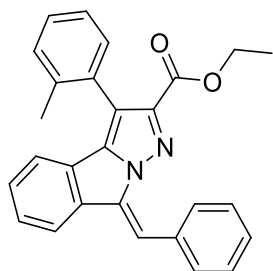

**Ethyl(Z)-8-benzylidene-3-(*o*-tolyl)-8H-pyrazolo[5,1-a]isoindole-2-carboxylate (3ak)**

Purified by column chromatography using petroleum ether/ ethyl acetate (10:1, V/V) as an eluent. Yellow solid; m.p.: 109-110 °C; yield: 37.4 mg (46%);  $^1H$  NMR (400 MHz,  $CDCl_3$ )  $\delta$  8.45 (d,  $J = 7.6$  Hz, 2H), 7.76 (d,  $J = 7.6$  Hz, 1H), 7.54-7.50 (m, 2H), 7.45-7.41 (m, 1H), 7.39-7.34 (m, 4H), 7.30-7.25 (m, 2H), 7.10 (d,  $J = 7.6$  Hz, 1H), 7.05 (s, 1H), 4.28 (q,  $J = 7.2$  Hz, 2H), 2.24 (s, 3H), 1.25 (t,  $J = 7.2$  Hz, 3H).  $^{13}C$  NMR (101 MHz,  $CDCl_3$ )  $\delta$  162.2, 145.1, 144.0, 137.3, 132.7, 131.2, 130.9, 130.7, 130.3, 129.9,

129.5, 129.0, 128.4, 128.1, 127.9, 127.4, 125.5, 120.4, 120.3, 116.7, 115.1, 60.7, 20.1, 13.9. HRMS (ESI-TOF)  $m/z$ :  $[M+Na]^+$  calcd for  $C_{27}H_{22}N_2O_2Na^+$  429.1579; found 429.1582.

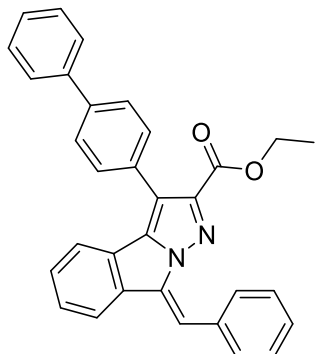

**Ethyl(*Z*)-3-([1,1'-biphenyl]-4-yl)-8-benzylidene-8*H*-pyrazolo[5,1-*a*]isoindole-2-carboxylate (3al)**

Purified by column chromatography using petroleum ether/ ethyl acetate (10:1, V/V) as an eluent. Yellow solid; m.p.: 172-173 °C; yield: 56.1 mg (60%);  $^1H$  NMR (400 MHz,  $CDCl_3$ )  $\delta$  8.39 (d,  $J = 7.6$  Hz, 2H), 7.70-7.65 (m, 7H), 7.50-7.43 (m, 5H), 7.41-7.30 (m, 3H), 7.28-7.24 (m, 1H), 6.96 (s, 1H), 4.34 (q,  $J = 7.2$  Hz, 2H), 1.34 (t,  $J = 7.2$  Hz, 3H).  $^{13}C$  NMR (101 MHz,  $CDCl_3$ )  $\delta$  162.5, 144.2, 143.6, 140.8, 140.5, 137.3, 132.7, 131.3, 130.5, 130.4, 130.1, 129.5, 128.9, 128.9, 128.3, 128.1, 127.4, 127.4, 127.1, 126.8, 120.4, 120.3, 117.8, 115.1, 60.9, 14.2. HRMS (ESI-TOF)  $m/z$ :  $[M+Na]^+$  calcd for  $C_{32}H_{24}N_2O_2Na^+$  491.1735; found 491.1737.

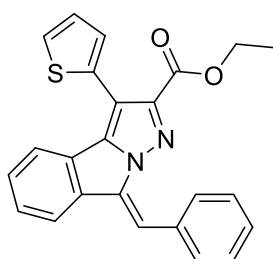

**Ethyl(*Z*)-8-benzylidene-3-(thiophen-2-yl)-8*H*-pyrazolo[5,1-*a*]isoindole-2-carboxylate (3am)**

Purified by column chromatography using petroleum ether/ ethyl acetate (10:1, V/V) as an eluent. Yellow solid; m.p.: 142-143 °C; yield: 35.8 mg (45%);  $^1H$  NMR (400 MHz,  $CDCl_3$ )  $\delta$  8.37 (d,  $J = 7.6$  Hz, 2H), 7.69 (t,  $J = 7.6$  Hz, 2H), 7.46-7.42 (m, 2H), 7.40-7.27 (m, 5H), 7.13-7.10 (m, 1H), 6.95 (s, 1H), 4.33 (q,  $J = 7.2$  Hz, 2H), 1.33 (t,  $J$

= 7.2 Hz, 3H).  $^{13}\text{C}$  NMR (101 MHz,  $\text{CDCl}_3$ )  $\delta$  162.1, 144.6, 144.1, 137.2, 132.6, 131.3, 130.4, 129.5, 128.9, 128.8, 128.3, 128.2, 127.1, 127.0, 126.1, 120.6, 120.4, 115.3, 110.4, 61.0, 14.1. HRMS (ESI-TOF)  $m/z$ :  $[\text{M}+\text{Na}]^+$  calcd for  $\text{C}_{24}\text{H}_{18}\text{SN}_2\text{O}_2\text{Na}^+$  421.0987; found 421.0991.

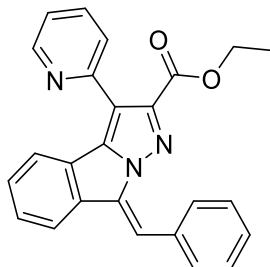

**Ethyl(Z)-8-benzylidene-3-(pyridin-2-yl)-8H-pyrazolo[5,1-a]isoindole-2-carboxylate (3an)**

Purified by column chromatography using petroleum ether/ ethyl acetate (10:1, V/V) as an eluent. Yellow solid; m.p.: 147-148 °C; yield: 62.1 mg (79%);  $^1\text{H}$  NMR (400 MHz,  $\text{CDCl}_3$ )  $\delta$  8.75 (d,  $J = 4.8$  Hz, 1H), 8.37 (d,  $J = 7.6$  Hz, 2H), 7.97-7.94 (m, 1H), 7.86 (d,  $J = 8.0$  Hz, 1H), 7.75 (td,  $J = 8.0, 2.0$  Hz, 1H), 7.70-7.68 (m, 1H), 7.48-7.44 (m, 2H), 7.41-7.33 (m, 3H), 7.27-7.24 (m, 1H), 6.99 (s, 1H), 4.38 (q,  $J = 7.2$  Hz, 2H), 1.38 (t,  $J = 7.2$  Hz, 3H).  $^{13}\text{C}$  NMR (101 MHz,  $\text{CDCl}_3$ )  $\delta$  162.7, 151.1, 149.0, 145.2, 143.9, 137.4, 135.9, 132.7, 131.4, 130.6, 129.5, 129.0, 128.8, 128.3, 128.3, 127.5, 125.3, 122.5, 122.2, 120.1, 118.1, 115.3, 61.1, 14.1. HRMS (ESI-TOF)  $m/z$ :  $[\text{M}+\text{H}]^+$  calcd for  $\text{C}_{25}\text{H}_{20}\text{N}_3\text{O}_2^+$  394.1556; found 394.1559.

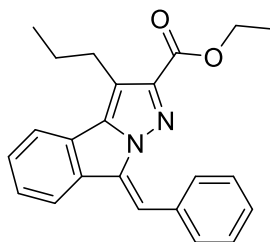

**Ethyl(Z)-8-benzylidene-3-propyl-8H-pyrazolo[5,1-a]isoindole-2-carboxylate (3ao)**

Purified by column chromatography using petroleum ether/ ethyl acetate (10:1, V/V) as an eluent. Yellow solid; m.p.: 84-85 °C; yield: 19.3 mg (27%);  $^1\text{H}$  NMR (400 MHz,  $\text{CDCl}_3$ )  $\delta$  8.40 (d,  $J = 7.6$  Hz, 2H), 7.75 (d,  $J = 7.2$  Hz, 1H), 7.61 (d,  $J = 7.6$  Hz, 1H), 7.49-7.36 (m, 5H), 6.94 (s, 1H), 4.42 (q,  $J = 7.2$  Hz, 2H), 3.02 (t,  $J = 7.2$  Hz, 2H), 1.79-1.69 (m, 2H), 1.45 (t,  $J = 7.2$  Hz, 3H), 1.01 (t,  $J = 7.2$  Hz, 3H).  $^{13}\text{C}$  NMR (101 MHz,

CDCl<sub>3</sub>)  $\delta$  162.9, 145.1, 143.9, 137.2, 132.8, 131.1, 130.7, 129.3, 129.0, 128.3, 128.0, 127.4, 120.5, 120.1, 118.2, 114.3, 60.7, 25.8, 23.9, 14.2, 13.9. HRMS (ESI-TOF)  $m/z$ : [M+Na]<sup>+</sup> calcd for C<sub>23</sub>H<sub>22</sub>N<sub>2</sub>O<sub>2</sub>Na<sup>+</sup> 381.1579; found 381.1580.

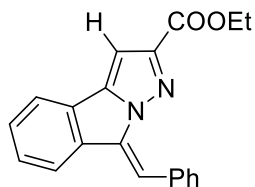

**Ethyl (Z)-8-benzylidene-8H-pyrazolo[5,1-a]isoindole-2-carboxylate (3ap)**

Purified by column chromatography using petroleum ether/ ethyl acetate (10:1, V/V) as an eluent. White solid; m.p.: 150-151 °C; yield: 24 mg (38%); <sup>1</sup>H NMR (400 MHz, CDCl<sub>3</sub>)  $\delta$  8.15-8.12 (m, 1H), 7.97-7.94 (m, 2H), 7.78-7.74 (m, 1H), 7.63-7.47 (m, 6H), 7.19 (s, 1H), 4.45 (q,  $J = 7.2$  Hz, 2H), 1.43 (t,  $J = 7.2$  Hz, 3H). <sup>13</sup>C NMR (101 MHz, CDCl<sub>3</sub>)  $\delta$  162.8, 144.1, 140.3, 138.5, 133.0, 129.5, 129.5, 129.0, 128.5, 128.4, 127.9, 127.4, 124.0, 123.5, 115.0, 100.8, 61.2, 14.4. HRMS (ESI-TOF)  $m/z$ : [M+Na]<sup>+</sup> calcd for C<sub>20</sub>H<sub>16</sub>N<sub>2</sub>O<sub>2</sub>Na<sup>+</sup> 339.1115; found 339.1112.

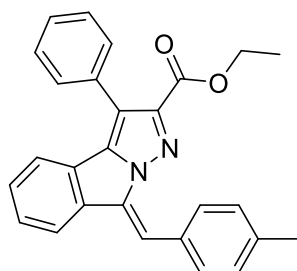

**Ethyl (Z)-8-(4-methylbenzylidene)-3-phenyl-8H-pyrazolo[5,1-a]isoindole-2-carboxylate (3aq)**

Purified by column chromatography using petroleum ether/ ethyl acetate (10:1, V/V) as an eluent. Yellow solid; m.p.: 134-135 °C; yield: 57.7 mg (71%); <sup>1</sup>H NMR (400 MHz, CDCl<sub>3</sub>)  $\delta$  8.33 (d,  $J = 8.0$  Hz, 2H), 7.70 (d,  $J = 7.6$  Hz, 1H), 7.62 (6.8 Hz, 2H), 7.51-7.41 (m, 4H), 7.35-7.24 (m, 4H), 6.97 (s, 1H), 4.36 (q,  $J = 7.2$  Hz, 2H), 2.44 (s, 3H), 1.35 (s,  $J = 7.2$  Hz, 3H). <sup>13</sup>C NMR (101 MHz, CDCl<sub>3</sub>)  $\delta$  162.4, 144.0, 143.5, 139.8, 137.4, 131.4, 131.3, 130.0, 129.9, 129.8, 129.1, 128.7, 128.1, 127.9, 127.7, 127.2, 120.3, 120.1, 117.9, 115.3, 60.8, 21.7, 14.1. HRMS (ESI-TOF)  $m/z$ : [M+Na]<sup>+</sup> calcd for C<sub>27</sub>H<sub>22</sub>N<sub>2</sub>O<sub>2</sub>Na<sup>+</sup> 429.1579; found 429.1582.

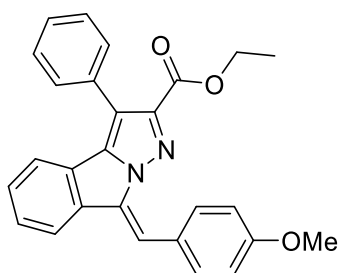

**Ethyl(Z)-8-(4-methoxybenzylidene)-3-phenyl-8H-pyrazolo[5,1-a]isoindole-2-carboxylate (3ar)**

Purified by column chromatography using petroleum ether/ ethyl acetate (10:1, V/V) as an eluent. Yellow solid; m.p.: 152-153 °C; yield: 65.0 mg (77%); <sup>1</sup>H NMR (400 MHz, CDCl<sub>3</sub>) δ 8.45 (d, *J* = 9.2 Hz, 2H), 7.67 (d, *J* = 8.8 Hz, 1H), 7.63-7.61 (m, 2H), 7.51-7.46 (m, 2H), 7.45-7.41 (m, 2H), 7.34-7.30 (m, 1H), 7.26-7.22 (m, 1H), 7.02-7.00 (m, 2H), 6.93 (s, 1H), 4.36 (q, *J* = 7.2 Hz, 2H), 3.88 (s, 3H), 1.34 (t, *J* = 7.2 Hz, 3H). <sup>13</sup>C NMR (101 MHz, CDCl<sub>3</sub>) δ 162.5, 160.6, 143.7, 143.3, 137.5, 133.3, 131.3, 130.0, 128.7, 128.4, 128.1, 127.8, 127.7, 126.9, 125.6, 120.1, 120.0, 117.8, 115.2, 113.8, 60.8, 55.4, 14.1. HRMS (ESI-TOF) *m/z*: [M+Na]<sup>+</sup> calcd for C<sub>27</sub>H<sub>22</sub>N<sub>2</sub>O<sub>3</sub>Na<sup>+</sup> 445.1528; found 445.1530.

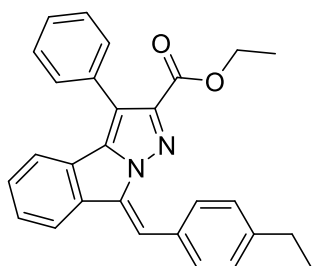

**Ethyl(Z)-8-(4-ethylbenzylidene)-3-phenyl-8H-pyrazolo[5,1-a]isoindole-2-carboxylate (3as)**

Purified by column chromatography using petroleum ether/ ethyl acetate (10:1, V/V) as an eluent. Yellow solid; m.p.: 125-126 °C; yield: 38.6 mg (46%); <sup>1</sup>H NMR (400 MHz, CDCl<sub>3</sub>) δ 8.26 (d, *J* = 8.4 Hz, 2H), 7.63 (d, *J* = 7.6 Hz, 1H), 7.52-7.49 (m, 2H), 7.39-7.21 (m, 7H), 7.18-7.14 (m, 1H), 6.89 (s, 1H), 4.24 (q, *J* = 7.2 Hz, 2H), 2.63 (q, *J* = 7.6 Hz, 2H), 1.25-1.17 (m, 6H). <sup>13</sup>C NMR (101 MHz, CDCl<sub>3</sub>) δ 162.4, 146.1, 144.0, 143.5, 137.4, 131.4, 131.2, 130.2, 130.0, 129.9, 128.7, 128.1, 127.9, 127.7, 127.2, 120.3,

120.2, 117.9, 115.3, 60.8, 28.9, 15.4, 14.1. HRMS (ESI-TOF)  $m/z$ :  $[M+Na]^+$  calcd for  $C_{28}H_{24}N_2O_2Na^+$  443.1735; found 443.1738.

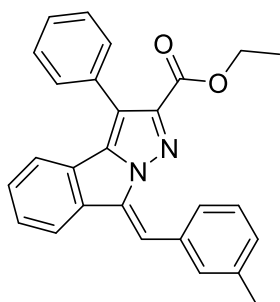

**Ethyl(*Z*)-8-(3-methylbenzylidene)-3-phenyl-8*H*-pyrazolo[5,1-*a*]isoindole-2-carboxylate (3at)**

Purified by column chromatography using petroleum ether/ ethyl acetate (10:1, V/V) as an eluent. Yellow solid; m.p.: 129-130 °C; yield: 65.0 mg (80%);  $^1H$  NMR (400 MHz,  $CDCl_3$ )  $\delta$  8.54 (s, 1H), 8.00 (d,  $J = 7.6$  Hz, 1H), 7.69 (d,  $J = 7.6$  Hz, 1H), 7.64-7.61 (m, 2H), 7.51-7.31 (m, 6H), 7.28-7.22 (m, 2H), 6.96 (s, 1H), 4.37 (q,  $J = 7.2$  Hz, 2H), 2.50 (s, 3H), 1.37 (t,  $J = 7.2$  Hz, 3H).  $^{13}C$  NMR (101 MHz,  $CDCl_3$ )  $\delta$  162.4, 143.9, 143.6, 137.9, 137.4, 132.6, 131.8, 131.1, 130.3, 130.0, 128.2, 128.7, 128.2, 128.1, 127.9, 127.8, 127.2, 120.3, 120.1, 118.1, 115.3, 60.9, 21.6, 14.2. HRMS (ESI-TOF)  $m/z$ :  $[M+Na]^+$  calcd for  $C_{27}H_{22}N_2O_2Na^+$  429.1579; found 429.1583.

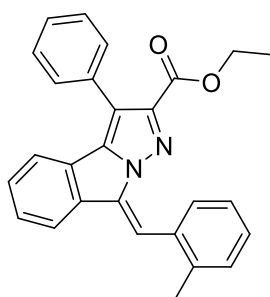

**Ethyl(*Z*)-8-(2-methylbenzylidene)-3-phenyl-8*H*-pyrazolo[5,1-*a*]isoindole-2-carboxylate (3au)**

Purified by column chromatography using petroleum ether/ ethyl acetate (10:1, V/V) as an eluent. Yellow solid; m.p.: 123-124 °C; yield: 60.1 mg (74%);  $^1H$  NMR (400 MHz,  $CDCl_3$ )  $\delta$  8.35-8.32 (m, 1H), 7.68 (d,  $J = 7.6$  Hz, 1H), 7.54-7.52 (m, 2H), 7.43-7.38 (m, 3H), 7.35-7.19 (m, 6H), 7.07 (s, 1H), 4.20 (q,  $J = 7.2$  Hz, 2H), 2.39 (s, 3H), 1.20 (t,  $J = 7.2$  Hz, 3H).  $^{13}C$  NMR (101 MHz,  $CDCl_3$ )  $\delta$  162.4, 144.4, 143.6, 137.4,

136.9, 131.4, 131.3, 131.2, 130.7, 130.0, 129.9, 129.4, 129.1, 128.1, 128.1, 127.7, 127.6, 125.4, 120.6, 120.3, 118.1, 112.6, 60.8, 20.5, 14.0. HRMS (ESI-TOF)  $m/z$ :  $[M+Na]^+$  calcd for  $C_{27}H_{22}N_2O_2Na^+$  429.1579; found 429.1583.

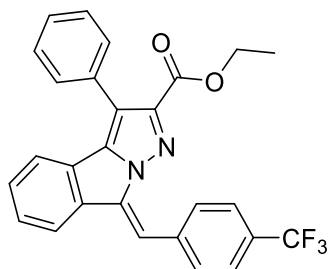

**Ethyl(Z)-3-phenyl-8-(4-(trifluoromethyl)benzylidene)-8H-pyrazolo[5,1-a]isoindole-2-carboxylate (3av)**

Purified by column chromatography using petroleum ether/ ethyl acetate (10:1, V/V) as an eluent. Yellow solid; m.p.: 171-172 °C; yield: 59.8 mg (65%);  $^1H$  NMR (400 MHz,  $CDCl_3$ )  $\delta$  8.45 (d,  $J = 8.4$  Hz, 2H), 7.71 (d,  $J = 8.4$  Hz, 3H), 7.61-7.58 (m, 2H), 7.50-7.28 (m, 6H), 6.94 (s, 1H), 4.33 (q,  $J = 7.2$  Hz, 2H), 1.33 (t,  $J = 7.2$  Hz, 3H).  $^{13}C$  NMR (101 MHz,  $CDCl_3$ )  $\delta$  162.1, 144.7, 143.8, 136.8, 136.1, 132.1, 131.2, 130.8, 130.0 (q,  $J = 32.8$  Hz), 129.9, 129.5, 128.2, 128.1, 127.9, 127.6, 125.1, 125.1 (q,  $J = 3.4$  Hz), 124.1 (q,  $J = 270.0$  Hz), 120.7, 120.3, 118.4, 112.7, 61.0, 14.0.  $^{19}F$  NMR (376 MHz,  $CDCl_3$ )  $\delta$  -62.69. HRMS (ESI-TOF)  $m/z$ :  $[M+Na]^+$  calcd for  $C_{27}H_{19}F_3N_2O_2Na^+$  483.1296; found 483.1299.

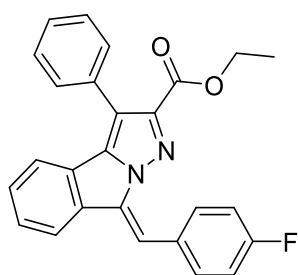

**Ethyl(Z)-8-(4-fluorobenzylidene)-3-phenyl-8H-pyrazolo[5,1-a]isoindole-2-carboxylate (3aw)**

Purified by column chromatography using petroleum ether/ ethyl acetate (10:1, V/V) as an eluent. Yellow solid; m.p.: 177-178 °C; yield: 68.1 mg (83%);  $^1H$  NMR (400 MHz,  $CDCl_3$ )  $\delta$  8.42-8.37 (m, 2H), 7.65-7.57 (m, 3H), 7.48-7.44 (m, 2H), 7.41-7.38 (m, 2H), 7.32-7.28 (m, 1H), 7.26-7.22 (m, 1H), 7.15-7.10 (m, 2H), 6.87 (s, 1H), 4.33 (q,  $J = 7.2$

Hz, 2H), 1.32 (t,  $J = 7.2$  Hz, 3H).  $^{13}\text{C}$  NMR (101 MHz,  $\text{CDCl}_3$ )  $\delta$  163.1 (d,  $J = 249.5$  Hz), 162.3, 144.1, 143.5, 137.1, 133.4 (d,  $J = 8.2$  Hz), 131.0, 130.1 (d,  $J = 2.3$  Hz), 129.9, 128.9, 128.1, 128.0, 127.8, 127.2, 120.2 (d,  $J = 6.6$  Hz), 118.0, 115.3 (d,  $J = 21.4$  Hz), 113.7, 60.9, 14.1.  $^{19}\text{F}$  NMR (376 MHz,  $\text{CDCl}_3$ )  $\delta$  -110.30. HRMS (ESI-TOF)  $m/z$ :  $[\text{M}+\text{Na}]^+$  calcd for  $\text{C}_{26}\text{H}_{19}\text{FN}_2\text{O}_2\text{Na}^+$  433.1328; found 433.1330.

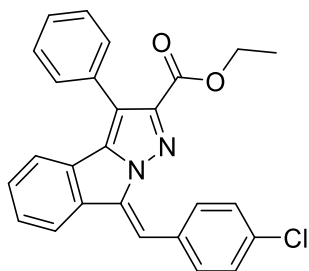

**Ethyl(Z)-8-(4-chlorobenzylidene)-3-phenyl-8H-pyrazolo[5,1-a]isoindole-2-carboxylate (3ax)**

Purified by column chromatography using petroleum ether/ ethyl acetate (10:1, V/V) as an eluent. Yellow solid; m.p.: 163-164 °C; yield: 70.0 mg (82%);  $^1\text{H}$  NMR (400 MHz,  $\text{CDCl}_3$ )  $\delta$  8.16 (d,  $J = 8.4$  Hz, 2H), 7.48-7.43 (m, 3H), 7.34-7.23 (m, 6H), 7.17-7.07 (m, 2H), 6.66 (s, 1H), 4.19 (q,  $J = 7.2$  Hz, 2H), 1.18 (t,  $J = 7.2$  Hz, 3H).  $^{13}\text{C}$  NMR (101 MHz,  $\text{CDCl}_3$ )  $\delta$  162.2, 144.3, 143.6, 137.0, 135.1, 132.5, 131.2, 130.9, 130.7, 129.9, 129.1, 128.5, 128.1, 128.0, 127.8, 127.3, 120.4, 120.2, 118.1, 113.4, 60.9, 14.1. HRMS (ESI-TOF)  $m/z$ :  $[\text{M}+\text{Na}]^+$  calcd for  $\text{C}_{26}\text{H}_{19}\text{ClN}_2\text{O}_2\text{Na}^+$  449.1033; found 449.1036.

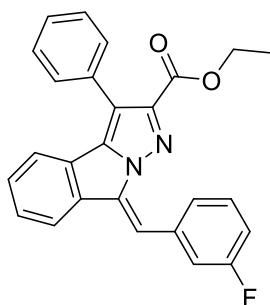

**Ethyl(Z)-8-(3-fluorobenzylidene)-3-phenyl-8H-pyrazolo[5,1-a]isoindole-2-carboxylate (3ay)**

Purified by column chromatography using petroleum ether/ ethyl acetate (10:1, V/V) as an eluent. Yellow solid; m.p.: 143-144 °C; yield: 62.3 mg (76%);  $^1\text{H}$  NMR (400 MHz,  $\text{CDCl}_3$ )  $\delta$  8.58 (d,  $J = 11.2$  Hz, 1H), 7.83 (d,  $J = 8.0$  Hz, 1H), 7.64 (d,  $J = 7.6$  Hz,

1H), 7.58 (d,  $J = 7.2$  Hz, 2H), 7.47-7.22 (m, 7H), 7.09-7.04 (m, 1H), 6.86 (s, 1H), 4.32 (q,  $J = 7.2$  Hz, 2H), 1.34 (t,  $J = 7.2$  Hz, 3H).  $^{13}\text{C}$  NMR (101 MHz,  $\text{CDCl}_3$ )  $\delta$  162.4 (d,  $J = 272.9$  Hz), 162.2, 144.3, 143.6, 137.0, 134.8 (d,  $J = 8.8$  Hz), 131.2, 130.8, 129.9, 129.5 (d,  $J = 8.2$  Hz), 129.2, 128.1, 128.1, 127.8, 127.5, 127.3, 127.3, 120.4, 120.0, 118.3, 117.7 (d,  $J = 23.8$  Hz), 116.2 (d,  $J = 21.4$  Hz), 113.5, 113.4, 61.0, 14.0.  $^{19}\text{F}$  NMR (376 MHz,  $\text{CDCl}_3$ )  $\delta$  -112.71. HRMS (ESI-TOF)  $m/z$ :  $[\text{M}+\text{Na}]^+$  calcd for  $\text{C}_{26}\text{H}_{19}\text{FN}_2\text{O}_2\text{Na}^+$  433.1328; found 433.1329.

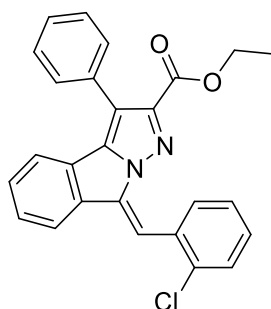

**Ethyl(Z)-8-(2-chlorobenzylidene)-3-phenyl-8H-pyrazolo[5,1-a]isoindole-2-carboxylate (3az)**

Purified by column chromatography using petroleum ether/ ethyl acetate (10:1, V/V) as an eluent. Yellow solid; m.p.: 185-186 °C; yield: 70.8 mg (83%);  $^1\text{H}$  NMR (400 MHz,  $\text{CDCl}_3$ )  $\delta$  8.65 (d,  $J = 7.6$  Hz, 1H), 7.69 (d,  $J = 7.6$  Hz, 1H), 7.51-7.48 (m, 2H), 7.40-7.20 (m, 10H), 4.20 (q,  $J = 7.2$  Hz, 2H), 1.18 (t,  $J = 7.2$  Hz, 3H).  $^{13}\text{C}$  NMR (101 MHz,  $\text{CDCl}_3$ )  $\delta$  162.2, 144.6, 143.8, 136.9, 134.6, 132.3, 132.1, 131.0, 130.6, 130.4, 129.9, 129.4, 129.2, 128.2, 128.1, 127.8, 127.6, 126.1, 120.9, 120.3, 118.3, 110.4, 60.8, 14.0. HRMS (ESI-TOF)  $m/z$ :  $[\text{M}+\text{Na}]^+$  calcd for  $\text{C}_{26}\text{H}_{19}\text{ClN}_2\text{O}_2\text{Na}^+$  449.1033; found 449.1036.

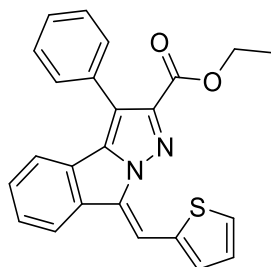

**Ethyl(Z)-3-phenyl-8-(thiophen-2-ylmethylene)-8H-pyrazolo[5,1-a]isoindole-2-carboxylate (3aaa)**

Purified by column chromatography using petroleum ether/ ethyl acetate (10:1, V/V)

as an eluent. Yellow solid; m.p.: 170-171 °C; yield: 74.9 mg (94%); <sup>1</sup>H NMR (400 MHz, CDCl<sub>3</sub>) δ 8.20 (d, *J* = 3.6 Hz, 1H), 7.60-7.54 (m, 3H), 7.49-7.47 (m, 1H), 7.43-7.34 (m, 4H), 7.26-7.22 (m, 1H), 7.20-7.17 (m, 1H), 7.16-7.13 (m, 1H), 7.08 (s, 1H), 4.32 (q, *J* = 7.2 Hz, 2H), 1.29 (t, *J* = 7.2 Hz, 3H). <sup>13</sup>C NMR (101 MHz, CDCl<sub>3</sub>) δ 162.5, 144.1, 142.6, 136.6, 136.5, 133.6, 131.2, 130.2, 130.0, 128.6, 128.2, 128.1, 127.8, 127.7, 127.6, 127.0, 120.2, 120.1, 118.1, 107.1, 60.9, 14.2. HRMS (ESI-TOF) *m/z*: [M+Na]<sup>+</sup> calcd for C<sub>24</sub>H<sub>18</sub>SN<sub>2</sub>O<sub>2</sub>Na<sup>+</sup> 421.0987; found 421.0990.

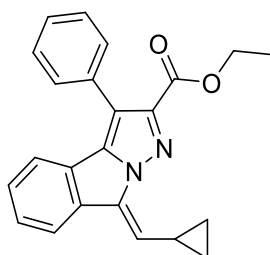

**Ethyl(Z)-8-(cyclopropylmethylene)-3-phenyl-8H-pyrazolo[5,1-a]isoindole-2-carboxylate (3aab)**

Purified by column chromatography using petroleum ether/ ethyl acetate (10:1, V/V) as an eluent. White solid; m.p.: 160-161 °C; yield: 48.4 mg (68%); <sup>1</sup>H NMR (400 MHz, CDCl<sub>3</sub>) δ 7.59-7.57 (m, 2H), 7.53 (d, *J* = 7.6 Hz, 1H), 7.48-7.39 (m, 4H), 7.32-7.28 (m, 1H), 7.26-7.21 (m, 1H), 5.60 (d, *J* = 10.8 Hz, 1H), 4.33 (q, *J* = 7.2 Hz, 2H), 3.37-3.33 (m, 1H), 1.29-1.21 (m, 5H), 0.80-0.76 (m, 2H). <sup>13</sup>C NMR (101 MHz, CDCl<sub>3</sub>) δ 162.7, 143.9, 142.8, 135.6, 131.6, 131.5, 130.0, 128.1, 128.0, 127.8, 127.5, 126.5, 123.9, 120.1, 119.7, 117.3, 60.9, 14.1, 10.8, 9.8. HRMS (ESI-TOF) *m/z*: [M+Na]<sup>+</sup> calcd for C<sub>23</sub>H<sub>20</sub>N<sub>2</sub>O<sub>2</sub>Na<sup>+</sup> 379.1422; found 379.1426.

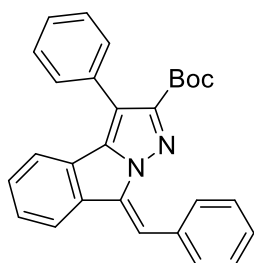

**tert-Butyl(Z)-8-benzylidene-3-phenyl-8H-pyrazolo[5,1-a]isoindole-2-carboxylate (3ba)**

Purified by column chromatography using petroleum ether/ ethyl acetate (10:1, V/V)

as an eluent. Yellow solid; m.p.: 149-150 °C; yield: 63.0 mg (75%); <sup>1</sup>H NMR (400 MHz, CDCl<sub>3</sub>) δ 8.47-8.44 (m, 2H), 7.73 (d, *J*=8.0 Hz, 1H), 7.59-7.56 (m, 2H), 7.52-7.45 (m, 4H), 7.43-7.38 (m, 3H), 7.37-7.33 (m, 1H), 7.30-7.25 (m, 1H), 6.99 (s, 1H), 1.50 (s, 9H). <sup>13</sup>C NMR (101 MHz, CDCl<sub>3</sub>) δ 161.4, 145.6, 143.5, 137.3, 132.8, 131.6, 131.3, 130.5, 129.9, 129.4, 128.9, 128.3, 128.1, 127.9, 127.6, 127.5, 120.4, 120.1, 117.7, 114.8, 81.5, 28.1. HRMS (ESI-TOF) *m/z*: [M+Na]<sup>+</sup> calcd for C<sub>28</sub>H<sub>24</sub>N<sub>2</sub>O<sub>2</sub>Na<sup>+</sup> 443.1735; found 443.1735.

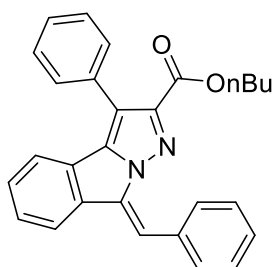

**Butyl(*Z*)-8-benzylidene-3-phenyl-8*H*-pyrazolo[5,1-*a*]isoindole-2-carboxylate (3ca)**

Purified by column chromatography using petroleum ether/ ethyl acetate (10:1, V/V) as an eluent. Yellow solid; m.p.: 125-126 °C; yield: 57.1 mg (68%); <sup>1</sup>H NMR (400 MHz, CDCl<sub>3</sub>) δ 8.44-8.41 (m, 2H), 7.72 (d, *J*= 7.6 Hz, 1H), 7.63-7.60 (m, 2H), 7.51-7.40 (m, 7H), 7.37-7.32 (m, 1H), 7.30-7.25 (m, 1H), 6.99 (s, 1H), 4.30 (t, *J*= 6.4 Hz, 2H), 1.73-1.65 (m, 2H), 1.49-1.39 (m, 2H), 0.97 (t, *J*= 7.6 Hz, 3H). <sup>13</sup>C NMR (101 MHz, CDCl<sub>3</sub>) δ 162.5, 144.2, 143.6, 137.3, 132.7, 131.3, 131.1, 130.5, 129.9, 129.4, 128.9, 128.3, 128.1, 128.0, 127.7, 127.3, 120.4, 120.2, 118.0, 115.0, 64.6, 30.6, 19.2, 13.8. HRMS (ESI-TOF) *m/z*: [M+Na]<sup>+</sup> calcd for C<sub>28</sub>H<sub>24</sub>N<sub>2</sub>O<sub>2</sub>Na<sup>+</sup> 443.1735; found 443.1738.

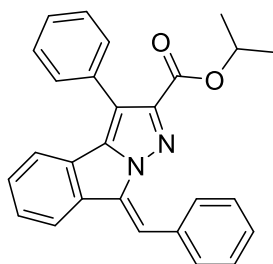

**(*Z*)-1-(8-Benzylidene-3-phenyl-8*H*-pyrazolo[5,1-*a*]isoindol-2-yl)-2-methylpropan-1-one (3da)**

Purified by column chromatography using petroleum ether/ ethyl acetate (10:1, V/V) as an eluent. Yellow solid; m.p.: 97-98 °C; yield: 71.5 mg (88%); <sup>1</sup>H NMR (400 MHz,

CDCl<sub>3</sub>) δ 8.43-8.41 (m, 2H), 7.70-7.67 (m, 1H), 7.59-7.57 (m, 2H), 7.49-7.36 (m, 7H), 7.33-7.29 (m, 1H), 7.26-7.22 (m, 1H), 6.96 (s, 1H), 5.24-5.14 (m, 1H), 1.30-1.27 (m, 6H). <sup>13</sup>C NMR (101 MHz, CDCl<sub>3</sub>) δ 161.9, 144.7, 143.5, 137.3, 132.7, 131.4, 131.3, 130.5, 130.0, 129.4, 128.9, 128.3, 128.1, 128.0, 127.7, 127.4, 120.4, 120.2, 117.9, 115.0, 68.5, 21.8. HRMS (ESI-TOF) m/Z: [M+Na]<sup>+</sup> calcd for C<sub>27</sub>H<sub>22</sub>N<sub>2</sub>O<sub>2</sub>Na<sup>+</sup> 429.1579; found 429.1582.

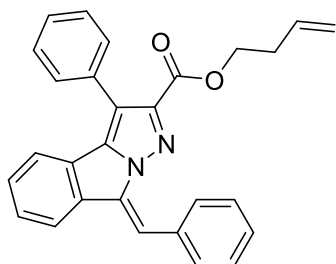

**But-3-en-1-yl(*Z*)-8-benzylidene-3-phenyl-8H-pyrazolo[5,1-*a*]isoindole-2-carboxylate (3ea)**

Purified by column chromatography using petroleum ether/ ethyl acetate (10:1, V/V) as an eluent. Yellow solid; m.p.: 96-97 °C; yield: 43.5 mg (52%); <sup>1</sup>H NMR (400 MHz, CDCl<sub>3</sub>) δ 8.41-8.38 (m, 2H), 7.71 (d, *J* = 7.6 Hz, 1H), 7.61-7.57 (m, 2H), 7.50-7.38 (m, 7H), 7.35-7.31 (m, 1H), 7.28-7.23 (m, 1H), 6.98 (s, 1H), 5.87-5.76 (m, 1H), 5.16-5.06 (m, 2H), 4.32 (t, *J* = 6.4 Hz, 2H), 2.47-2.42 (m, 2H). <sup>13</sup>C NMR (101 MHz, CDCl<sub>3</sub>) δ 162.3, 144.0, 143.6, 137.3, 134.1, 132.7, 131.3, 131.1, 130.5, 129.9, 129.4, 128.9, 128.3, 128.1, 128.0, 127.8, 127.3, 120.4, 120.2, 118.1, 117.2, 115.1, 64.1, 32.9. HRMS (ESI-TOF) m/Z: [M+Na]<sup>+</sup> calcd for C<sub>28</sub>H<sub>22</sub>N<sub>2</sub>O<sub>2</sub>Na<sup>+</sup> 441.1579; found 441.1582.

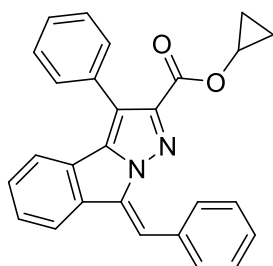

**(*Z*)-(8-Benzylidene-3-phenyl-8H-pyrazolo[5,1-*a*]isoindol-2-yl)(cyclopropyl)methanone (3fa)**

Purified by column chromatography using petroleum ether/ ethyl acetate (10:1, V/V) as an eluent. Yellow solid; m.p.: 155-156 °C; yield: 63.1 mg (78%); <sup>1</sup>H NMR (400 MHz,

CDCl<sub>3</sub>)  $\delta$  8.18-8.16 (m, 2H), 7.48 (d,  $J$  = 7.6 Hz, 1H), 7.38-7.35 (m, 2H), 7.29-7.24 (m, 4H), 7.22-7.17 (m, 3H), 7.14-7.09 (m, 1H), 7.07-7.02 (m, 1H), 6.75 (s, 1H), 4.15-4.10 (m, 1H), 0.56-0.54 (m, 4H). <sup>13</sup>C NMR (101 MHz, CDCl<sub>3</sub>)  $\delta$  163.1, 143.7, 143.6, 137.2, 132.6, 131.3, 131.0, 130.5, 130.0, 129.5, 128.9, 128.3, 128.1, 128.0, 127.8, 127.3, 120.4, 120.2, 118.1, 115.2, 49.3, 5.2. HRMS (ESI-TOF)  $m/z$ : [M+Na]<sup>+</sup> calcd for C<sub>27</sub>H<sub>20</sub>N<sub>2</sub>O<sub>2</sub>Na<sup>+</sup> 427.1422; found 427.1426.

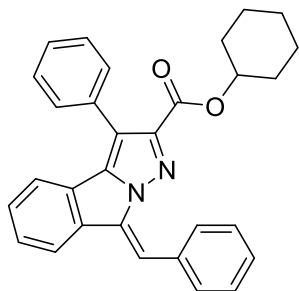

**Cyclohexyl(Z)-8-benzylidene-3-phenyl-8H-pyrazolo[5,1-a]isoindole-2-carboxylate (3ga)**

Purified by column chromatography using petroleum ether/ ethyl acetate (10:1, V/V) as an eluent. Yellow solid; m.p.: 214-215 °C; yield: 66.0 mg (74%); <sup>1</sup>H NMR (400 MHz, CDCl<sub>3</sub>)  $\delta$  8.46-8.44 (m, 2H), 7.71 (d,  $J$  = 8.0 Hz, 1H), 7.61-7.58 (m, 2H), 7.50-7.38 (m, 7H), 7.35-7.31 (m, 1H), 7.28-7.23 (m, 1H), 6.97 (s, 1H), 5.07-5.01 (m, 1H), 1.89-1.83 (m, 2H), 1.74-1.67 (m, 2H), 1.60-1.34 (m, 6H). <sup>13</sup>C NMR (101 MHz, CDCl<sub>3</sub>)  $\delta$  161.8, 144.7, 143.5, 137.3, 132.7, 131.4, 131.3, 130.5, 130.0, 129.4, 128.9, 128.3, 128.1, 127.9, 127.7, 127.4, 120.4, 120.2, 117.9, 115.0, 72.9, 31.3, 25.5, 23.2. HRMS (ESI-TOF)  $m/z$ : [M+Na]<sup>+</sup> calcd for C<sub>30</sub>H<sub>26</sub>N<sub>2</sub>O<sub>2</sub>Na<sup>+</sup> 469.1892; found 469.1896.

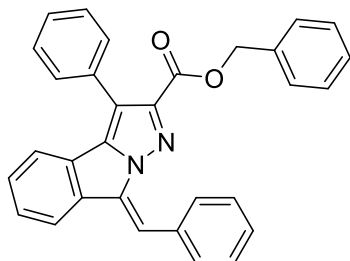

**Benzyl(Z)-8-benzylidene-3-phenyl-8H-pyrazolo[5,1-a]isoindole-2-carboxylate (3ha)**

Purified by column chromatography using petroleum ether/ ethyl acetate (10:1, V/V) as an eluent. Yellow solid; m.p.: 159-160 °C; yield: 66.3 mg (73%); <sup>1</sup>H NMR (400 MHz,

CDCl<sub>3</sub>)  $\delta$  8.27-8.24 (m, 2H), 7.55 (d,  $J = 8.0$  Hz, 1H), 7.47-7.44 (m, 2H), 7.34-7.16 (m, 13H), 7.14-7.09 (m, 1H), 6.83 (s, 1H), 5.20 (s, 2H). <sup>13</sup>C NMR (101 MHz, CDCl<sub>3</sub>)  $\delta$  162.1, 143.8, 143.6, 137.3, 135.9, 132.7, 131.4, 130.1, 130.5, 130.0, 129.5, 128.9, 128.5, 128.3, 128.2, 128.1, 128.0, 127.8, 127.8, 127.3, 120.4, 120.2, 118.3, 115.2, 66.3. HRMS (ESI-TOF)  $m/z$ :  $[M+Na]^+$  calcd for C<sub>31</sub>H<sub>22</sub>N<sub>2</sub>O<sub>2</sub>Na<sup>+</sup> 477.1579; found 477.1580.

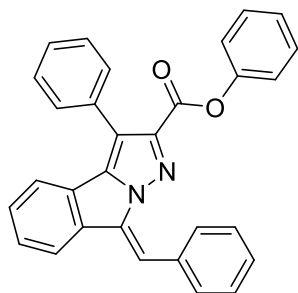

**Phenyl(*Z*)-8-benzylidene-3-phenyl-8*H*-pyrazolo[5,1-*a*]isoindole-2-carboxylate**

**(3ia)**

Purified by column chromatography using petroleum ether/ ethyl acetate (10:1, V/V) as an eluent. Yellow solid; m.p.: 158-159 °C; yield: 32.5 mg (37%); <sup>1</sup>H NMR (400 MHz, CDCl<sub>3</sub>)  $\delta$  8.47 (d,  $J = 8.0$  Hz, 2H), 7.79 (d,  $J = 8.0$  Hz, 1H), 7.69-7.66 (m, 2H), 7.53-7.46 (m, 5H), 7.43-7.38 (m, 5H), 7.35-7.31 (m, 1H), 7.26-7.22 (m, 3H), 7.08 (s, 1H). <sup>13</sup>C NMR (101 MHz, CDCl<sub>3</sub>)  $\delta$  160.7, 150.7, 143.8, 143.2, 137.3, 132.5, 131.3, 130.8, 130.5, 130.0, 129.6, 129.3, 129.0, 128.4, 128.2, 127.9, 127.2, 125.7, 121.6, 120.4, 120.3, 118.8, 115.6. HRMS (ESI-TOF)  $m/z$ :  $[M+Na]^+$  calcd for C<sub>30</sub>H<sub>20</sub>N<sub>2</sub>O<sub>2</sub>Na<sup>+</sup> 463.1422; found 463.1425.

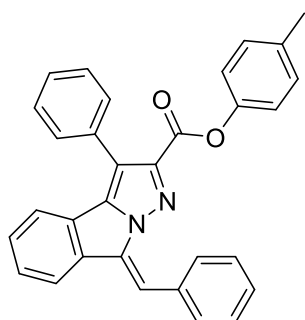

***p*-Tolyl(*Z*)-8-benzylidene-3-phenyl-8*H*-pyrazolo[5,1-*a*]isoindole-2-carboxylate**

**(3ja)**

Purified by column chromatography using petroleum ether/ ethyl acetate (10:1, V/V) as an eluent. Yellow solid; m.p.: 117-118 °C; yield: 25.4 mg (28%); <sup>1</sup>H NMR (400 MHz,

CDCl<sub>3</sub>)  $\delta$  8.46 (d,  $J$  = 7.6 Hz, 2H), 7.80 (d,  $J$  = 7.6 Hz, 1H), 7.67-7.65 (m, 2H), 7.52-7.31 (m, 9H), 7.20-7.17 (m, 2H), 7.11-7.08 (m, 3H), 2.34 (s, 3H). <sup>13</sup>C NMR (101 MHz, CDCl<sub>3</sub>)  $\delta$  160.8, 148.5, 143.8, 143.3, 137.3, 135.3, 132.5, 131.3, 130.8, 130.5, 130.0, 129.8, 129.6, 129.0, 128.4, 128.2, 127.9, 127.3, 121.3, 120.4, 120.3, 118.7, 115.5, 20.9. HRMS (ESI-TOF)  $m/z$ : [M+Na]<sup>+</sup> calcd for C<sub>31</sub>H<sub>22</sub>N<sub>2</sub>O<sub>2</sub>Na<sup>+</sup> 477.1579; found 477.1581.

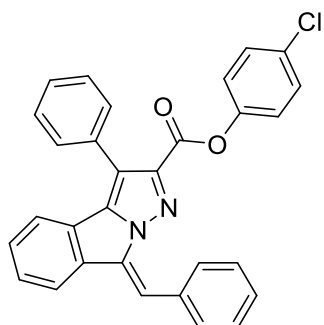

**4-Chlorophenyl(*Z*)-8-benzylidene-3-phenyl-8*H*-pyrazolo[5,1-*a*]isoindole-2-carboxylate (3ka)**

Purified by column chromatography using petroleum ether/ ethyl acetate (10:1, V/V) as an eluent. Yellow solid; m.p.: 167-168 °C; yield: 25.1 mg (26%); <sup>1</sup>H NMR (400 MHz, CDCl<sub>3</sub>)  $\delta$  8.45-8.43 (m, 2H), 7.77-7.75 (m, 1H), 7.67-7.66 (m, 2H), 7.52-7.47 (m, 5H), 7.44-7.30 (m, 6H), 7.19-7.15 (m, 2H), 7.06 (s, 1H). <sup>13</sup>C NMR (101 MHz, CDCl<sub>3</sub>)  $\delta$  160.4, 149.2, 143.9, 142.8, 137.2, 132.4, 131.3, 131.0, 130.7, 130.5, 130.0, 129.7, 129.4, 129.1, 128.4, 128.3, 128.0, 127.1, 123.0, 120.5, 120.3, 118.9, 115.7. HRMS (ESI-TOF)  $m/z$ : [M+Na]<sup>+</sup> calcd for C<sub>30</sub>H<sub>19</sub>ClN<sub>2</sub>O<sub>2</sub>Na<sup>+</sup> 497.1033; found 497.1034.

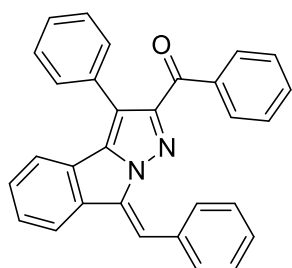

**(*Z*)-(8-Benzylidene-3-phenyl-8*H*-pyrazolo[5,1-*a*]isoindol-2-yl)(phenyl)methanone (3la)**

Purified by column chromatography using petroleum ether/ ethyl acetate (10:1, V/V) as an eluent. Yellow solid; m.p.: 180-181 °C; yield: 25.4 mg (30%); <sup>1</sup>H NMR (400 MHz, CDCl<sub>3</sub>)  $\delta$  8.33-8.22 (m, 4H), 7.78 (d,  $J$  = 7.6 Hz, 1H), 7.66-7.31 (m, 14H), 7.04 (s, 1H). <sup>13</sup>C NMR (101 MHz, CDCl<sub>3</sub>)  $\delta$  160.7, 150.7, 143.8, 143.2, 137.3, 132.5, 131.3,

130.8, 130.5, 130.0, 129.6, 129.3, 129.0, 128.4, 128.2, 127.9, 127.2, 125.7, 121.69, 120.4, 120.3, 118.8, 115.6. HRMS (ESI-TOF)  $m/z$ :  $[M+Na]^+$  calcd for  $C_{30}H_{20}N_2ONa^+$  447.1473; found 447.1476.

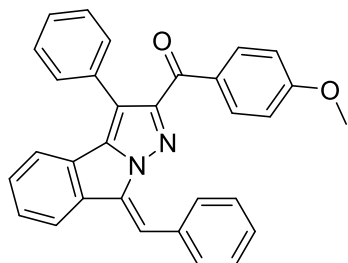

**(Z)-(8-Benzylidene-3-phenyl-8H-pyrazolo[5,1-a]isoindol-2-yl)(4-methoxyphenyl)methanone (3ma)**

Purified by column chromatography using petroleum ether/ ethyl acetate (10:1, V/V) as an eluent. Yellow solid; m.p.: 202-203 °C; yield: 25.4 mg (28%);  $^1H$  NMR (400 MHz,  $CDCl_3$ )  $\delta$  8.34-8.30 (m, 4H), 7.78-7.76 (m, 1H), 7.64-7.62 (m, 2H), 7.56-7.54 (m, 1H), 7.49-7.45 (m, 2H), 7.41-7.37 (m, 5H), 7.34-7.31 (m, 1H), 7.02 (s, 1H), 6.97-6.95 (m, 2H), 3.91 (s, 3H).  $^{13}C$  NMR (101 MHz,  $CDCl_3$ )  $\delta$  186.7, 163.3, 150.7, 143.3, 137.4, 133.2, 132.8, 131.5, 131.1, 130.8, 130.5, 129.7, 129.1, 129.0, 128.3, 128.3, 128.1, 127.6, 127.4, 120.4, 118.5, 114.3, 113.2, 55.5. HRMS (ESI-TOF)  $m/z$ :  $[M+Na]^+$  calcd for  $C_{31}H_{22}N_2O_2Na^+$  477.1579; found 477.1582.

#### 4. Derivatization of Product

Synthetic transformation of **3aa** to **4**<sup>[4]</sup>

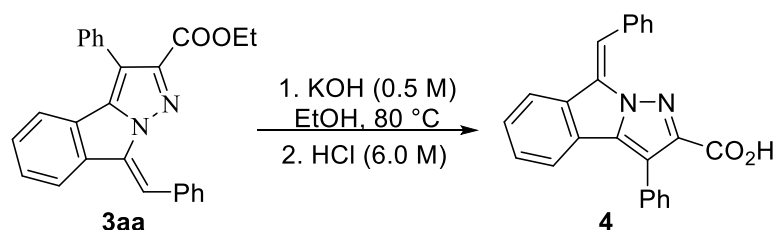

To a solution of **3aa** (0.2 mmol, 78.4 mg) in ethanol (1 mL) was added aqueous KOH (0.5 M, 1 mL). The resulting mixture was heated under reflux at 80 °C for 12 h. After cooling to room temperature, the reaction was quenched with aqueous HCl (6.0 M, 1 mL). The mixture was extracted with  $CH_2Cl_2$  ( $3 \times 10$  mL), and the combined organic layers were dried over anhydrous  $Na_2SO_4$ , filtered, and concentrated under reduced

pressure to afford product **4** (58.3 mg, 80%) as a yellow solid.

**(Z)-8-Benzylidene-3-phenyl-8H-pyrazolo[5,1-a]isoindole-2-carboxylic acid (4)**

Purified by column chromatography using petroleum ether/ ethyl acetate (1:1, V/V) as an eluent. Yellow solid; m.p.: 217-218 °C; yield: 58.3 mg (80%); <sup>1</sup>H NMR (400 MHz, DMSO-d<sub>6</sub>) δ 12.97 (s, 1H), 8.46 (d, *J* = 7.6 Hz, 2H), 8.14 (d, *J* = 7.6 Hz, 1H), 7.61-7.58 (m, 2H), 7.54-7.38 (m, 10H). <sup>13</sup>C NMR (101 MHz, DMSO-d<sub>6</sub>) δ 163.6, 145.5, 143.4, 137.4, 133.1, 131.6, 131.3, 130.2, 130.1, 130.1, 129.8, 129.7, 128.8, 128.7, 128.6, 128.0, 126.8, 121.9, 119.9, 117.5, 115.4. HRMS (ESI-TOF) *m/z*: [M+Na]<sup>+</sup> calcd for C<sub>24</sub>H<sub>16</sub>N<sub>2</sub>O<sub>2</sub>Na<sup>+</sup> 387.1109; found 387.1111.

Synthetic transformation of **3aa** to **5**<sup>[5]</sup>

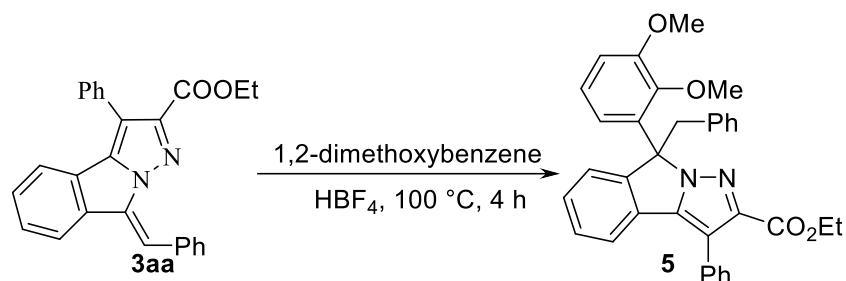

To a solution of **3aa** (0.2 mmol, 78.4 mg) and 1,2-dimethoxybenzene (0.3 mmol, 78 μL) in HBF<sub>4</sub> (1 mL) was heated to 100 °C for 2 h. After cooling to room temperature, the reaction mixture was diluted with CH<sub>2</sub>Cl<sub>2</sub> and washed repeatedly with distilled water. The organic layer was dried over anhydrous Na<sub>2</sub>SO<sub>4</sub>, filtered, and concentrated under reduced pressure to yield the corresponding product **5** (47.7 mg, 45%) as a white solid.

**Ethyl 8-benzyl-8-(2,3-dimethoxyphenyl)-3-phenyl-8H-pyrazolo[5,1-a]isoindole-2-carboxylate (5)**

Purified by column chromatography using petroleum ether/ ethyl acetate (5:1, V/V) as an eluent. White solid; m.p.: 86-87 °C; yield: 47.7 mg (45%); <sup>1</sup>H NMR (400 MHz, CDCl<sub>3</sub>) δ 7.41-7.27 (m, 7H), 7.16-7.16 (m, 2H), 7.09-7.06 (m, 1H), 7.02-6.97 (m, 1H), 6.93-6.86 (m, 4H), 6.54 (d, *J* = 7.2 Hz, 2H), 4.34 (q, *J* = 7.2 Hz, 2H), 4.15-4.11 (m, 1H), 3.87 (s, 3H), 3.82 (s, 3H), 1.27 (m, 4H). <sup>13</sup>C NMR (101 MHz, CDCl<sub>3</sub>) δ 162.6, 149.2, 149.0, 147.8, 144.0, 143.5, 133.9, 132.1, 131.7, 129.9, 129.8, 129.0, 128.2, 127.8, 127.7, 127.4, 127.3, 126.6, 124.0, 120.1, 119.2, 117.8, 111.1, 110.3, 74.8, 60.7, 56.0, 55.9,

44.7, 26.9, 14.2. HRMS (ESI-TOF)  $m/z$ :  $[M+Na]^+$  calcd for  $C_{34}H_{30}N_2O_4Na^+$  553.2103; found 553.2106.

Synthetic transformation of **3aa** to **6**<sup>[6]</sup>

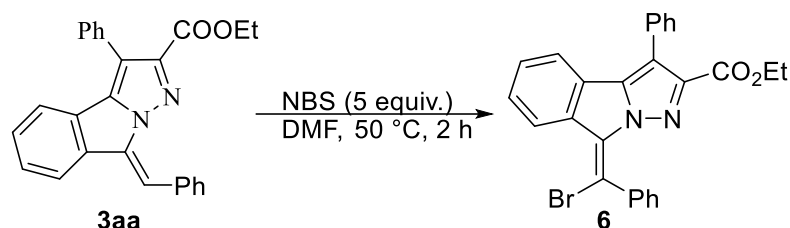

To a solution of **3aa** (0.2 mmol, 78.4 mg) in DMF (2 mL) in a sealed pressure tube was added NBS (1.2 mmol, 213.6 mg). The mixture was stirred under air at 50 °C for 2 h. After completion, the reaction mixture was cooled to room temperature and concentrated under reduced pressure. The residue was diluted with ethyl acetate (3 × 15 mL), washed with brine, and dried over anhydrous  $Na_2SO_4$ . The crude product was purified by silica gel column chromatography to afford product **6** (45.2 mg, 48%) as a yellow solid.

#### Ethyl(E)-8-(bromo(phenyl)methylene)-3-phenyl-8H-pyrazolo[5,1-a]isoindole-2-carboxylate (**6**)

Purified by column chromatography using petroleum ether/ ethyl acetate (5:1, V/V) as an eluent. Yellow solid; m.p.: 227-228 °C; yield: 45.2 mg (48%);  $^1H$  NMR (400 MHz,  $CDCl_3$ )  $\delta$  7.58-7.45 (m, 9H), 7.43-7.37 (m, 2H), 7.21-7.17 (m, 1H), 6.97-6.93 (m, 1H), 6.33 (d,  $J = 8.0$  Hz, 1H), 4.35 (q,  $J = 7.2$  Hz, 2H), 1.32 (t,  $J = 7.2$  Hz, 3H).  $^{13}C$  NMR (100 MHz,  $CDCl_3$ )  $\delta$  162.3, 144.5, 143.3, 139.0, 135.1, 132.5, 131.0, 130.0, 129.9, 129.4, 129.3, 129.2, 128.1, 128.0, 127.8, 127.5, 124.2, 120.0, 118.2, 111.8, 61.1, 14.1. HRMS (ESI-TOF)  $m/z$ :  $[M+Na]^+$  calcd for  $C_{26}H_{19}N_2O_2BrNa^+$  493.0528, found 493.0532.

Synthetic Transformation of **3aa** to **7**

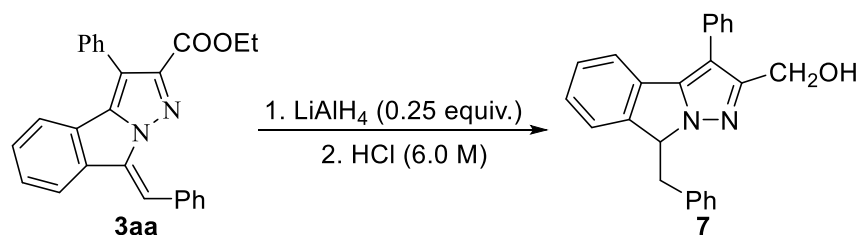

To a solution of **3aa** (0.2 mmol, 78.4 mg) in THF (1 mL) under N<sub>2</sub> was added LiAlH<sub>4</sub> (0.25 equiv.). After the reaction was complete (monitored by TLC), the mixture was quenched with aqueous HCl (6.0 M, 1 mL). The resulting mixture was extracted with CH<sub>2</sub>Cl<sub>2</sub> (3 × 10 mL), and the combined organic layers were dried over anhydrous Na<sub>2</sub>SO<sub>4</sub>, filtered, and concentrated under reduced pressure to afford product **7** (38.0 mg, 54%) as a white solid.

**(8-Benzyl-3-phenyl-8H-pyrazolo[5,1-a]isoindol-2-yl)methanol (7)**

Purified by column chromatography using petroleum ether/ ethyl acetate (1:1, V/V) as an eluent. White solid; m.p.: 209-210 °C; yield: 38.0 mg (54%); <sup>1</sup>H NMR (400 MHz, DMSO-d<sub>6</sub>) δ 7.63-7.61 (m, 2H), 7.50-7.45 (m, 3H), 7.35-7.26 (m, 4H), 7.15-7.11 (m, 3H), 6.99-6.96 (m, 2H), 5.68-5.65 (m, 1H), 5.25 (t, *J* = 5.2 Hz, 1H), 4.55-4.47 (m, 2H), 3.65-3.60 (m, 1H), 3.34-3.29 (m, 1H). <sup>13</sup>C NMR (101 MHz, DMSO-d<sub>6</sub>) δ 153.8, 144.4, 142.3, 135.9, 133.0, 130.4, 130.0, 129.1, 128.9, 128.6, 128.3, 127.5, 126.9, 124.5, 119.6, 113.9, 63.0, 56.4, 39.1. HRMS (ESI-TOF) *m/z*: [M+Na]<sup>+</sup> calcd for C<sub>24</sub>H<sub>20</sub>N<sub>2</sub>ONa<sup>+</sup> 375.1576; found 375.1579.

Synthetic Transformation of **3aa** to **8**<sup>[7]</sup>

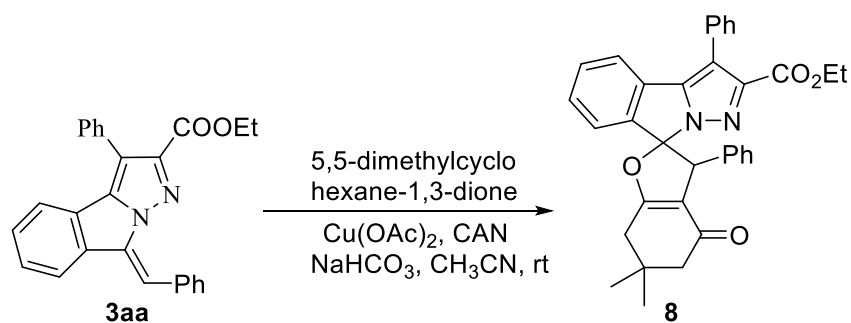

To a solution of **3aa** (0.2 mmol, 78.4 mg) in CH<sub>3</sub>CN (2.0 mL) were added dimedone (0.4 mmol, 56.0 mg), Cu(OAc)<sub>2</sub> (0.04 mmol, 7.3 mg), CAN (0.5 mmol, 265.0 mg), and Na<sub>2</sub>CO<sub>3</sub> (0.6 mmol, 63.6 mg). The resulting mixture was stirred at room temperature for 12 h. The solvent was removed under reduced pressure, and the crude residue was Purified by silica gel column chromatography to afford product **8** (46.2 mg, 44%, dr = 2.5:1) as a white solid.

**Ethyl 6,6-dimethyl-4-oxo-3,3'-diphenyl-4,5,6,7-tetrahydro-3H-spiro[benzofuran-2,8'-pyrazolo[5,1-a]isoindole]-2'-carboxylate (8)**



7.2 Hz, 3H).  $^{13}\text{C}$  NMR (101 MHz,  $\text{CDCl}_3$ )  $\delta$  161.7, 161.4, 134.2, 133.5, 131.9, 131.5, 130.7, 130.3, 130.0, 129.8, 128.7, 127.3, 127.0, 126.9, 126.8, 126.6, 124.8, 123.2, 121.6, 118.7, 60.8, 60.3, 14.1, 14.0. HRMS (ESI-TOF)  $m/z$ :  $[\text{M}+\text{Na}]^+$  calcd for  $\text{C}_{31}\text{H}_{27}\text{N}_3\text{O}_4\text{Na}^+$  528.1894; found 528.1899.

## 5. Mechanism Experiments

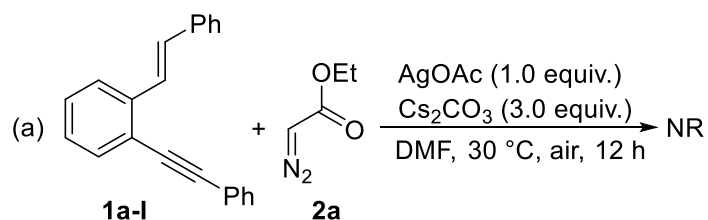

To a solution of **1a-I** (0.2 mmol, 56.0 mg) in DMF (3.0 mL) were added ethyl diazoacetate (0.4 mmol, 42  $\mu\text{L}$ ), AgOAc (0.2 mmol, 33.4 mg), and  $\text{Cs}_2\text{CO}_3$  (0.6 mmol, 195.5 mg). The resulting mixture was stirred at 30  $^\circ\text{C}$  under air for 12 h. The reaction did not proceed, underscoring the essential role of the cyano group in the reaction mechanism.

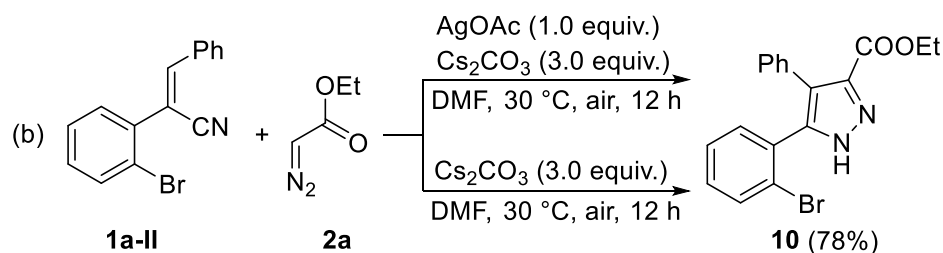

To two solution of **1a-II** (0.2 mmol, 56.8 mg) in DMF (3.0 mL) were added ethyl diazoacetate (0.4 mmol, 42  $\mu\text{L}$ ) and  $\text{Cs}_2\text{CO}_3$  (0.6 mmol, 195.5 mg) among them, one was added with AgOAc (0.2 mmol, 33.4 mg) while the other was not. The resulting mixtures were stirred at 30  $^\circ\text{C}$  for 12 h. After completion of the reaction (monitored by TLC), the mixtures were subjected to extraction, drying, and vacuum distillation to remove the solvent. Purification by flash column chromatography on silica gel (eluting with ethyl acetate/petroleum ether), the conclusion indicates that the non-target [3+2]cycloadduct **10** in 78% yield under both standard and silver-free conditions.

### Ethyl 5-(2-bromophenyl)-4-phenyl-1H-pyrazole-3-carboxylate (**10**)

Purified by column chromatography using petroleum ether/ ethyl acetate (3:1, V/V) as an eluent. White solid; m.p.: 60-61  $^\circ\text{C}$ ; yield: 57.9 mg (78 %);  $^1\text{H}$  NMR (400 MHz,

CDCl<sub>3</sub>)  $\delta$  8.11 (s, 1H), 7.57-7.54 (m, 1H), 7.25-7.17 (m, 8H), 4.33 (d,  $J$  = 7.2 Hz, 2H), 1.28 (t,  $J$  = 7.2 Hz, 3H). <sup>13</sup>C NMR (101 MHz, CDCl<sub>3</sub>)  $\delta$  133.0, 132.5, 131.0, 130.3, 130.2, 127.6, 127.3, 127.1, 124.0, 61.2, 14.0. HRMS (ESI-TOF)  $m/z$ : [M+Na]<sup>+</sup> calcd for C<sub>18</sub>H<sub>15</sub>N<sub>2</sub>O<sub>2</sub>BrNa<sup>+</sup> 393.0206.2; found 393.0209.

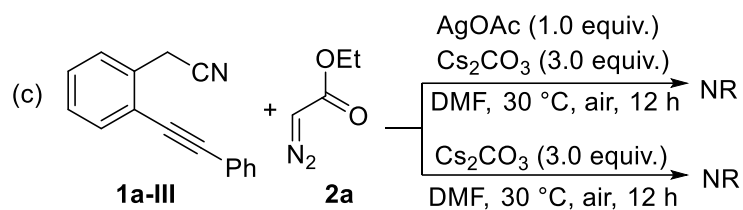

To two solutions of **1a-III** (0.2 mmol, 43.4 mg) in DMF (3.0 mL) were added ethyl diazoacetate (0.4 mmol, 42  $\mu$ L) and Cs<sub>2</sub>CO<sub>3</sub> (0.6 mmol, 195.5 mg), among them, one was added with AgOAc (0.2 mmol, 33.4 mg) while the other was not. The resulting mixtures were stirred at 30  $^\circ$ C for 12 h. Notably, a control experiment conducted under identical conditions failed to yield any product, indicating that a prior [3+2] cycloaddition step is essential for this transformation.

## 6. Crystal structure of 3aa

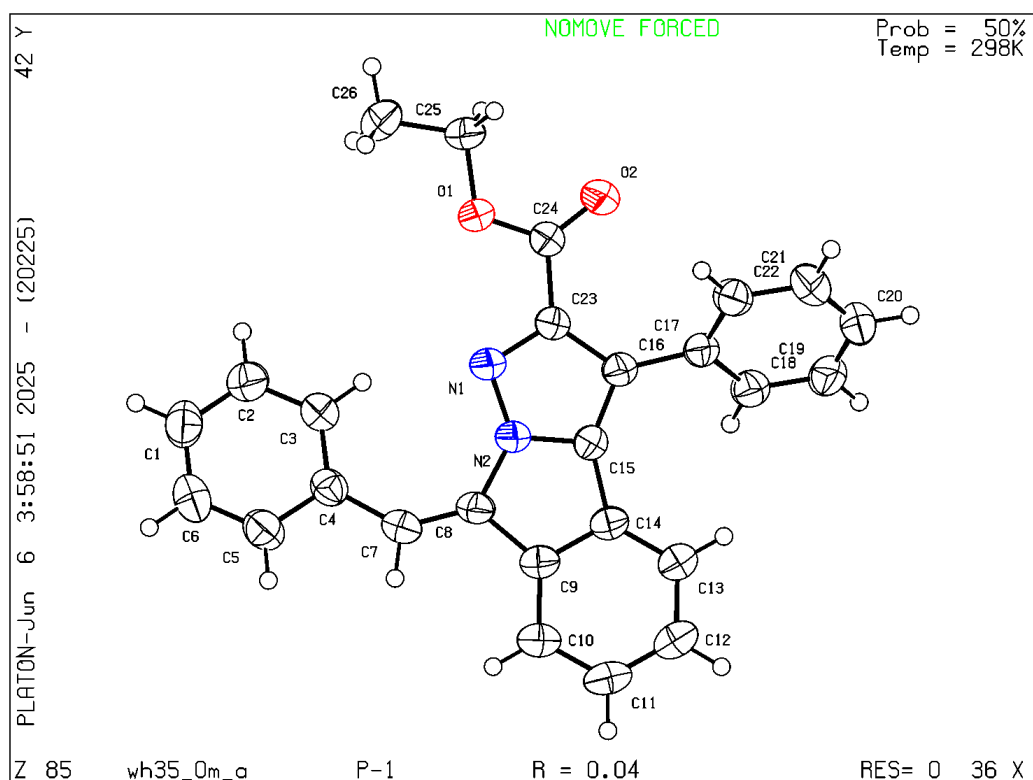

Bond precision: C-C = 0.0030 Å

Wavelength=0.71073

Cell: a=10.8575(7)

b=10.8827(7)

c=11.0362(7)

alpha=114.911(2)

beta=98.835(3)

gamma=113.122(2)

Temperature: 298 K

|                                         | Calculated                                                    | Reported                                                      |
|-----------------------------------------|---------------------------------------------------------------|---------------------------------------------------------------|
| <b>Volume</b>                           | 1005.01(12)                                                   | 1005.01(11)                                                   |
| <b>Space group</b>                      | P -1                                                          | P-1                                                           |
| <b>Hall group</b>                       | -P 1                                                          | -P 1                                                          |
| <b>Moiety formula</b>                   | C <sub>26</sub> H <sub>20</sub> N <sub>2</sub> O <sub>2</sub> | C <sub>26</sub> H <sub>20</sub> N <sub>2</sub> O <sub>2</sub> |
| <b>Sum formula</b>                      | C <sub>26</sub> H <sub>20</sub> N <sub>2</sub> O <sub>2</sub> | C <sub>26</sub> H <sub>20</sub> N <sub>2</sub> O <sub>2</sub> |
| <b>Mr</b>                               | 392.44                                                        | 392.44                                                        |
| <b>D<sub>x</sub>, g cm<sup>-3</sup></b> | 1.297                                                         | 1.297                                                         |
| <b>Z</b>                                | 2                                                             | 2                                                             |
| <b>Mu (mm<sup>-1</sup>)</b>             | 0.083                                                         | 0.083                                                         |
| <b>F<sub>000</sub></b>                  | 412.0                                                         | 412.0                                                         |

|                  |              |          |
|------------------|--------------|----------|
| <b>F000'</b>     | 412.17       |          |
| <b>h,k,lmax</b>  | 12,12,13     | 12,12,13 |
| <b>Nref</b>      | 3550         | 3541     |
| <b>Tmin,Tmax</b> | 0.987, 0.988 |          |
| <b>Tmin'</b>     | 0.987        |          |

Correction method= Not given

Data completeness= 0.997                      Theta(max)= 25.060

R(reflections)= 0.0436( 2717)              wR2(reflections)= 0.1127( 3541)

S = 1.042                      Npar= 272

## 7. References

- [1] J. Li, X. Tan, H. Jiang and W. Wu, *Org. Lett.* 2024, **26**, 5409–5414.
- [2] J.-C. Hsieh, A.-Y. Cheng, J.-H. Fu and T.-W. Kang, *Org. Biomol. Chem.*, 2012, **10**, 6404–6409.
- [3] (a) C.-F., Gao, Y. Zhou, H. Ma, Y. Zhang, J. Nie, F.-G. Zhang and J.-A. Ma, *CCS Chem.*, 2022, **4**, 3693–3704; (b) Y. Zhou, C.-F. Gao, H. Ma, J. Nie, J.A. Ma and F.-G. Zhang, *Chem. Asian J.* 2022, **17**, e202200436.
- [4] L. Liu, L. Li, S. Mao, X. Wang, M.-D. Zhou, Y.-L. Zhao and H. Wang, *Chem. Commun.*, 2020, **56**, 7665–7668.
- [5] K. Alam, S. W. Hong, K. H. Oh and J. K. Park, *Angew. Chem. Int. Ed.*, 2017, **56**, 13387–13391.
- [6] H. Chen, Y. Ran, H. Wang, J. Sun, Y. Wang, R. Sun, L. Li and M.-D. Zhou, *Adv. Synth. Catal.*, 2025, **367**, e70080.
- [7] G. Savitha, S. K. Niveditha, D. Muralidharan and P. T. Perumal, *Tetrahedron lett.*, 2007, **48**, 2943–2947.
- [8] D. Zheng, S. Li, Y. Luo and J. Wu, *Org. Lett.*, 2011, **13**, 6402–6405.

## 8. NMR Spectra

$^1\text{H}$  NMR spectra of compound **1a**.

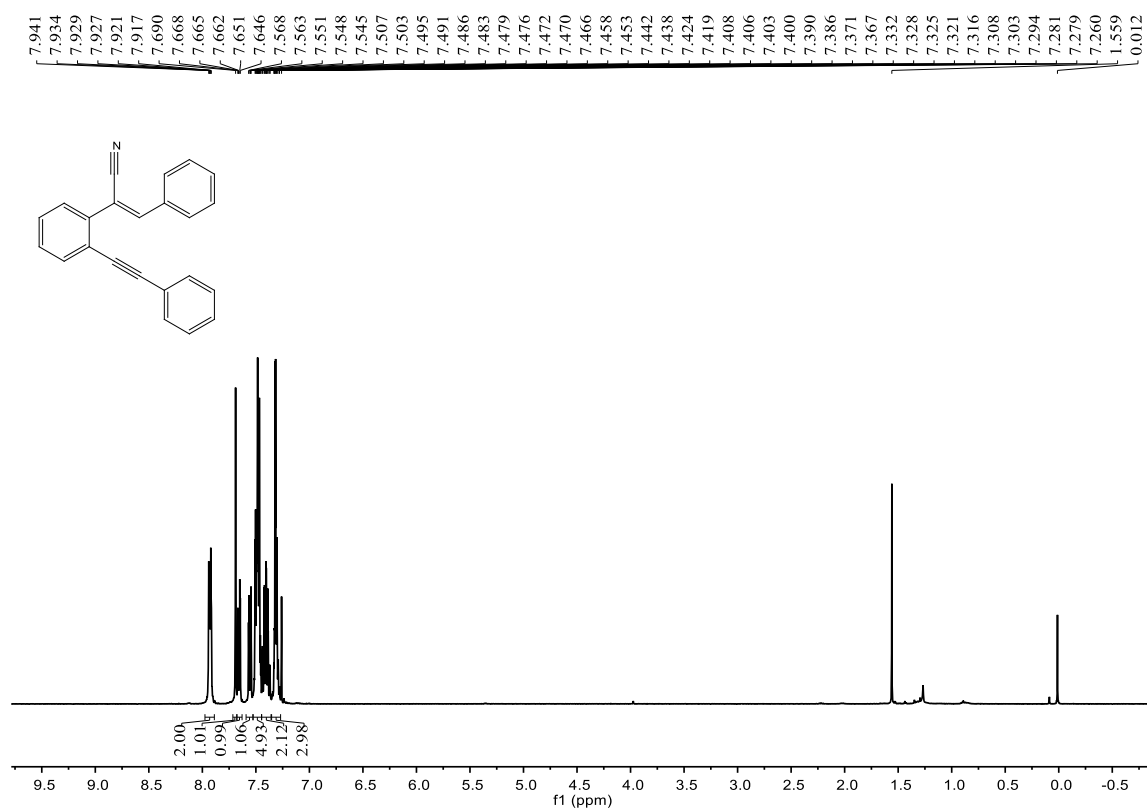

$^{13}\text{C}$  NMR spectra of compound **1a**.

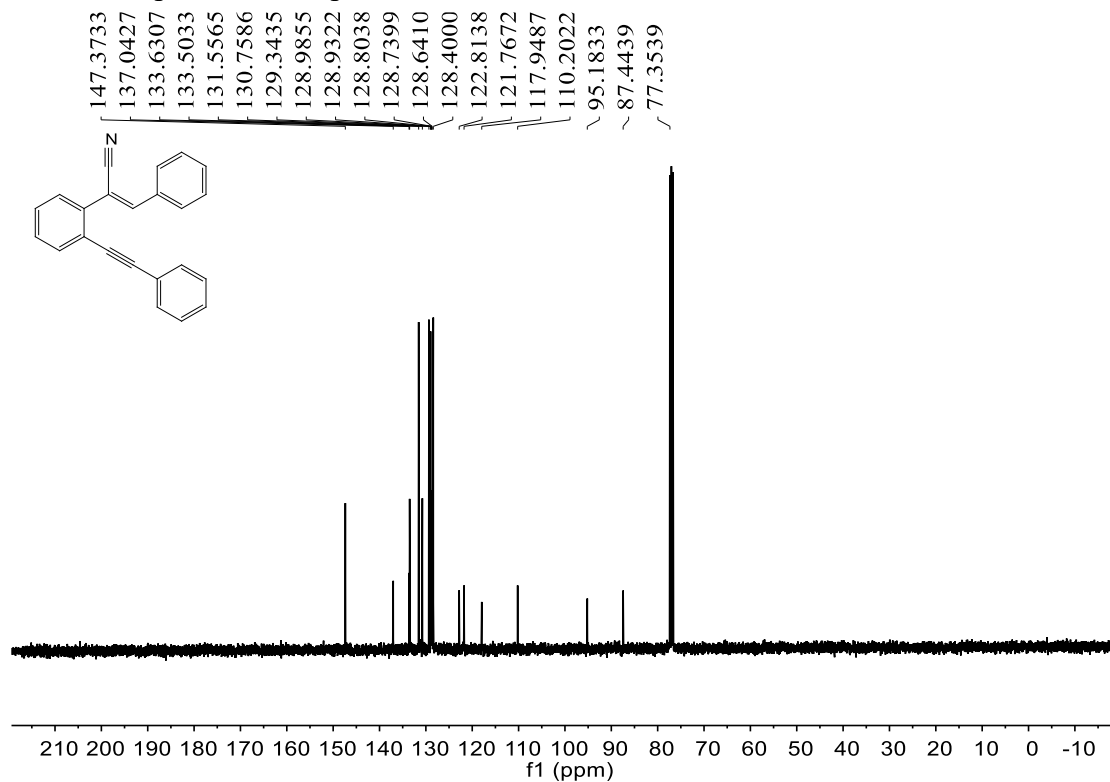

### <sup>1</sup>H NMR spectra of compound **1b**.

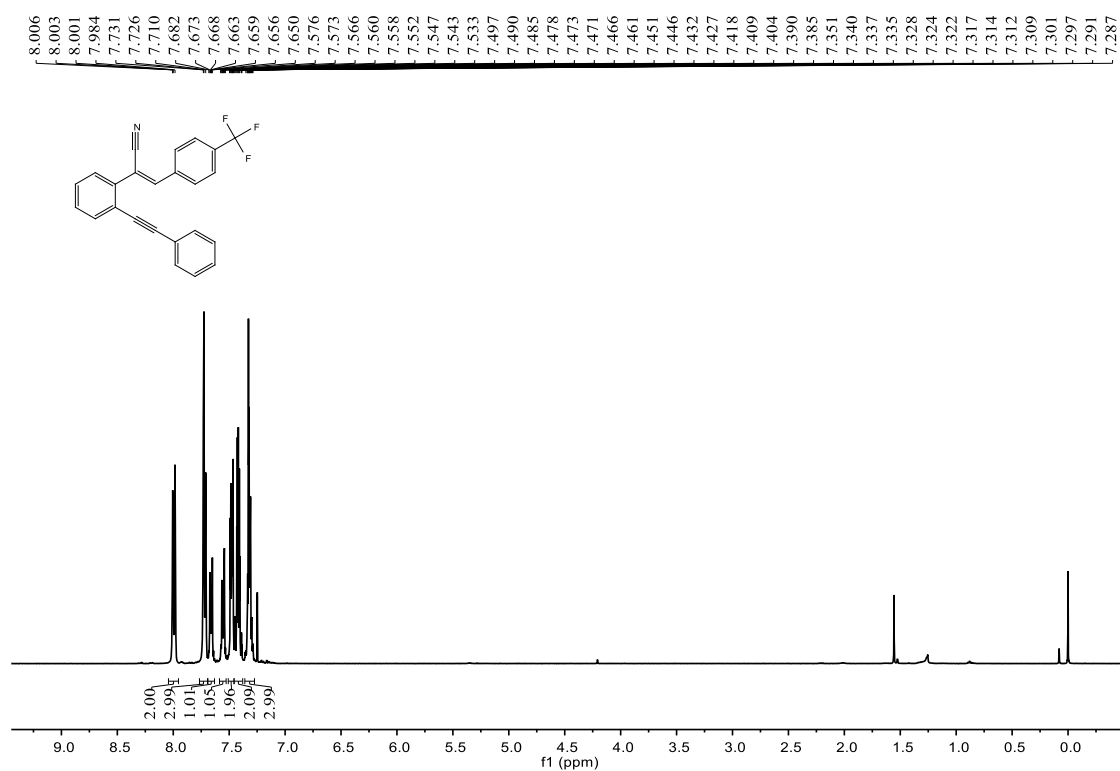

### <sup>13</sup>C NMR spectra of compound **1b**.

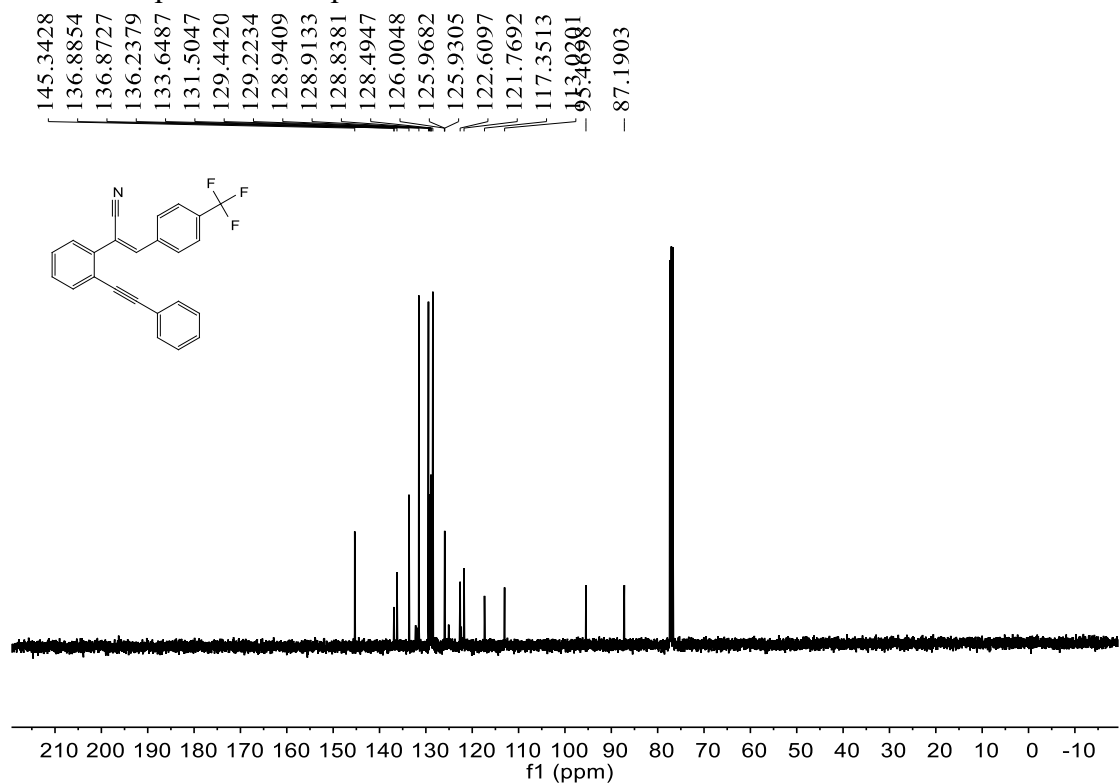

<sup>19</sup>F NMR spectra of compound **1b**.

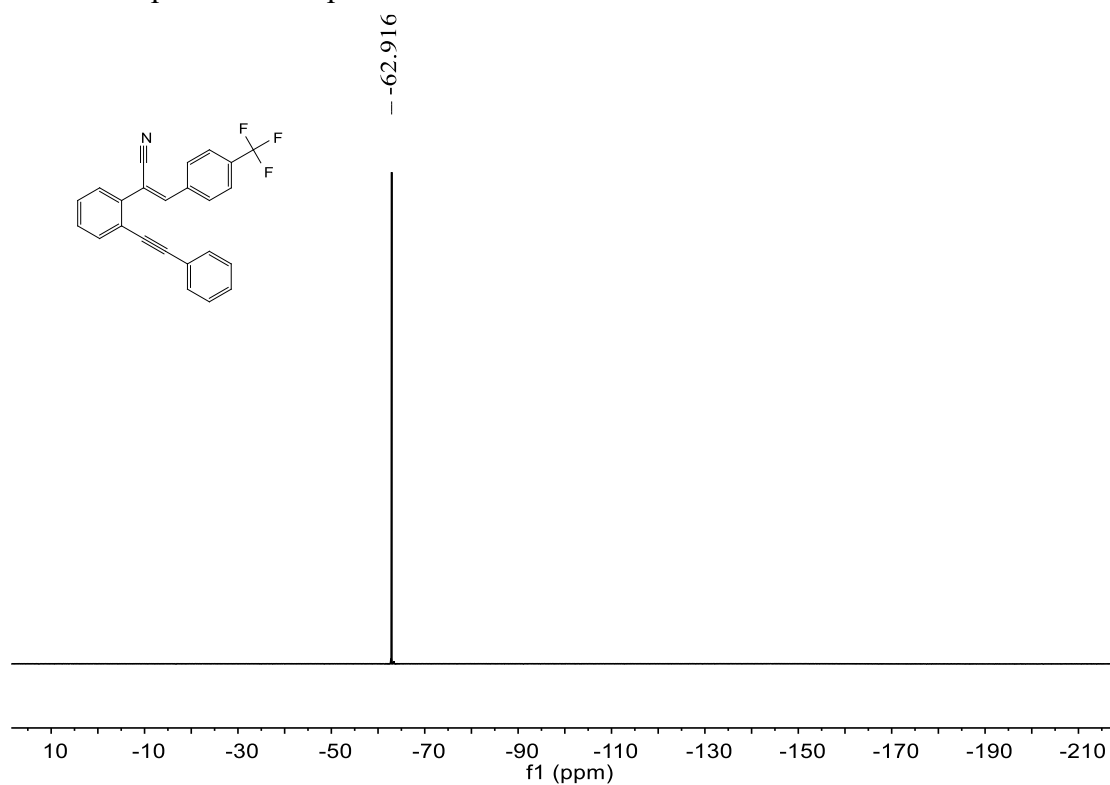

<sup>1</sup>H NMR spectra of compound **1c**.

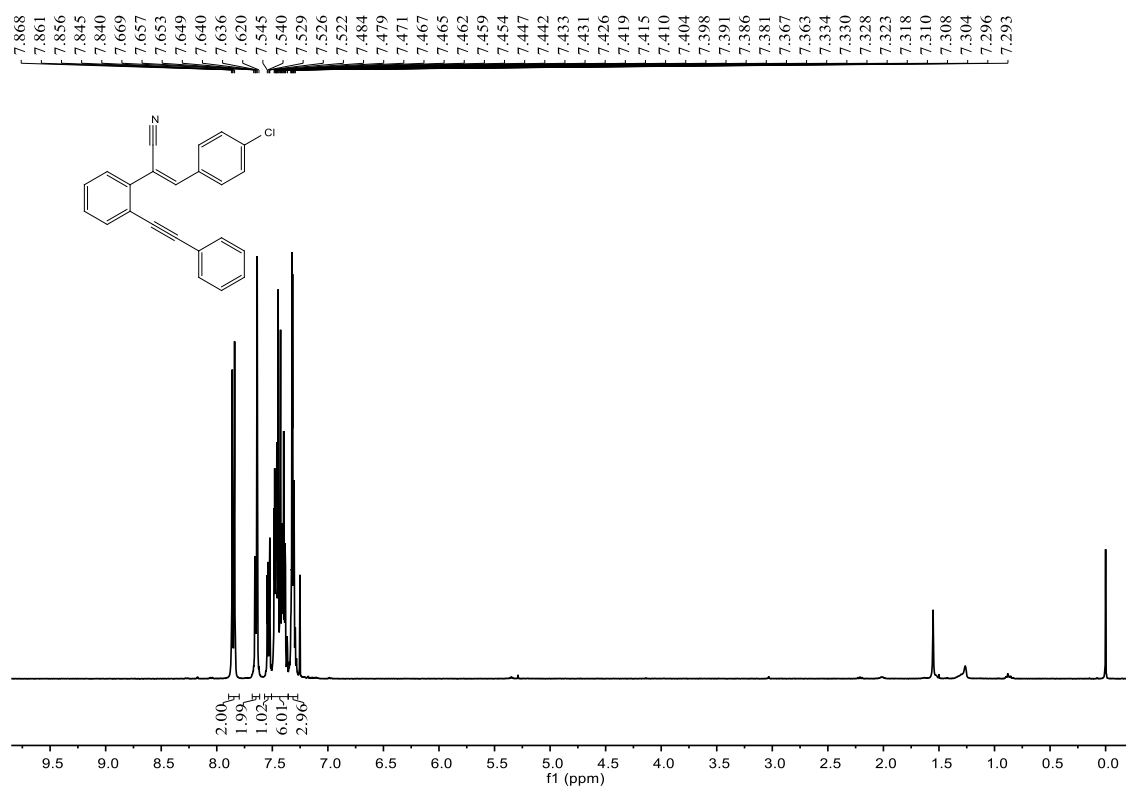

<sup>13</sup>C NMR spectra of compound **1c**.

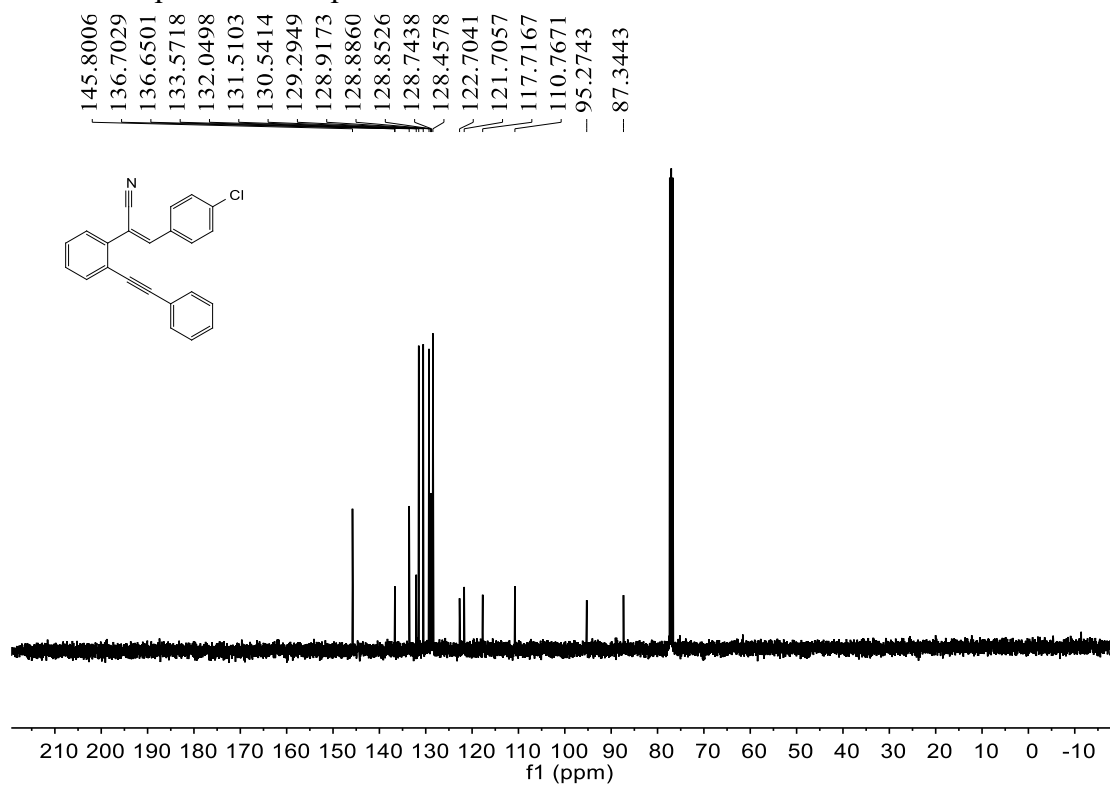

<sup>1</sup>H NMR spectra of compound **1d**.

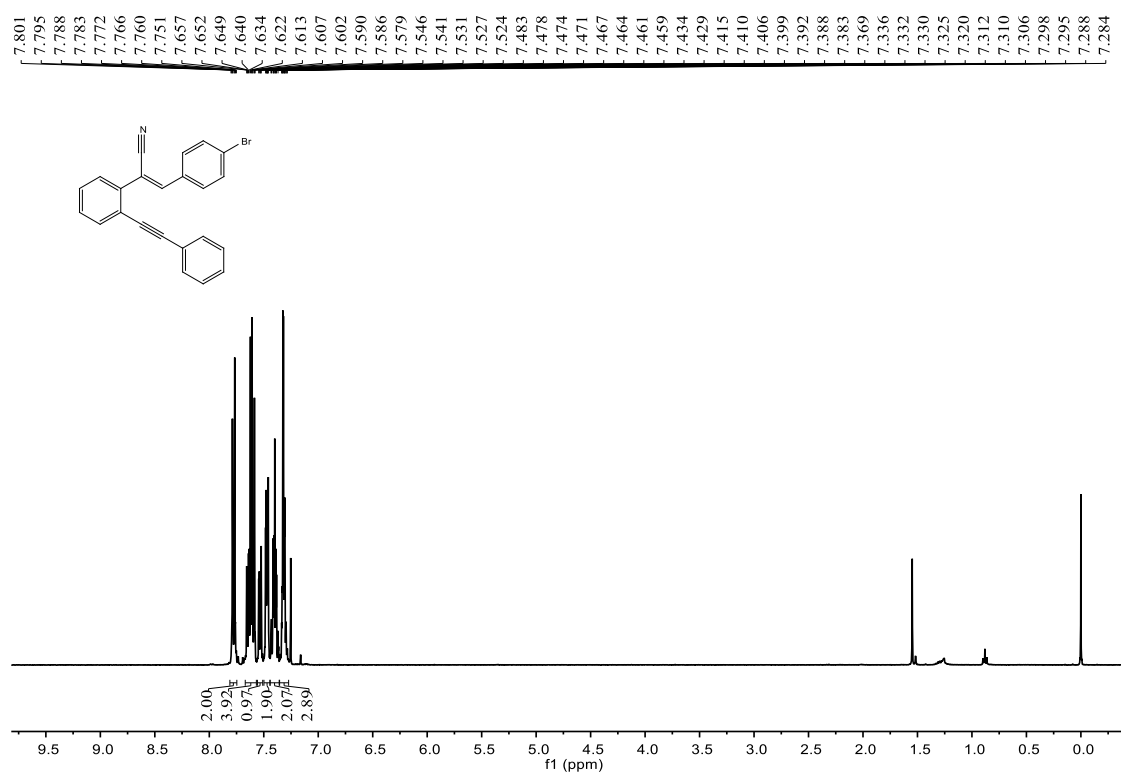

<sup>13</sup>C NMR spectra of compound **1d**.

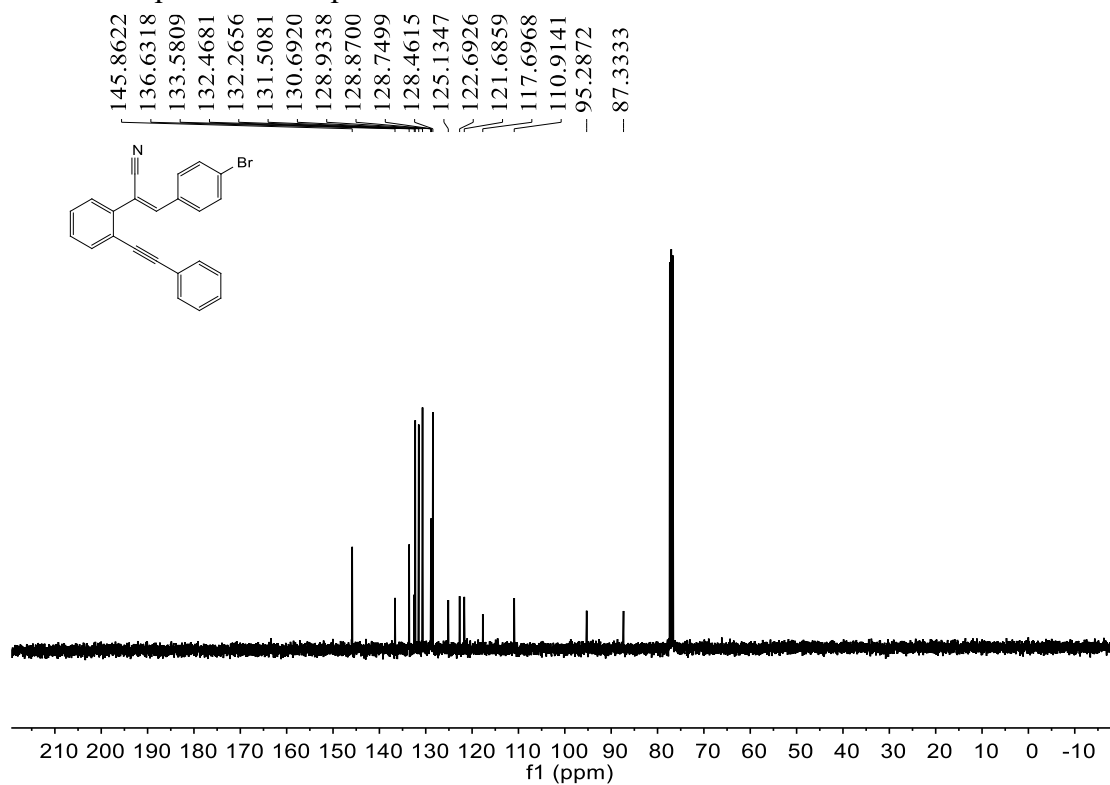

<sup>1</sup>H NMR spectra of compound **1e**.

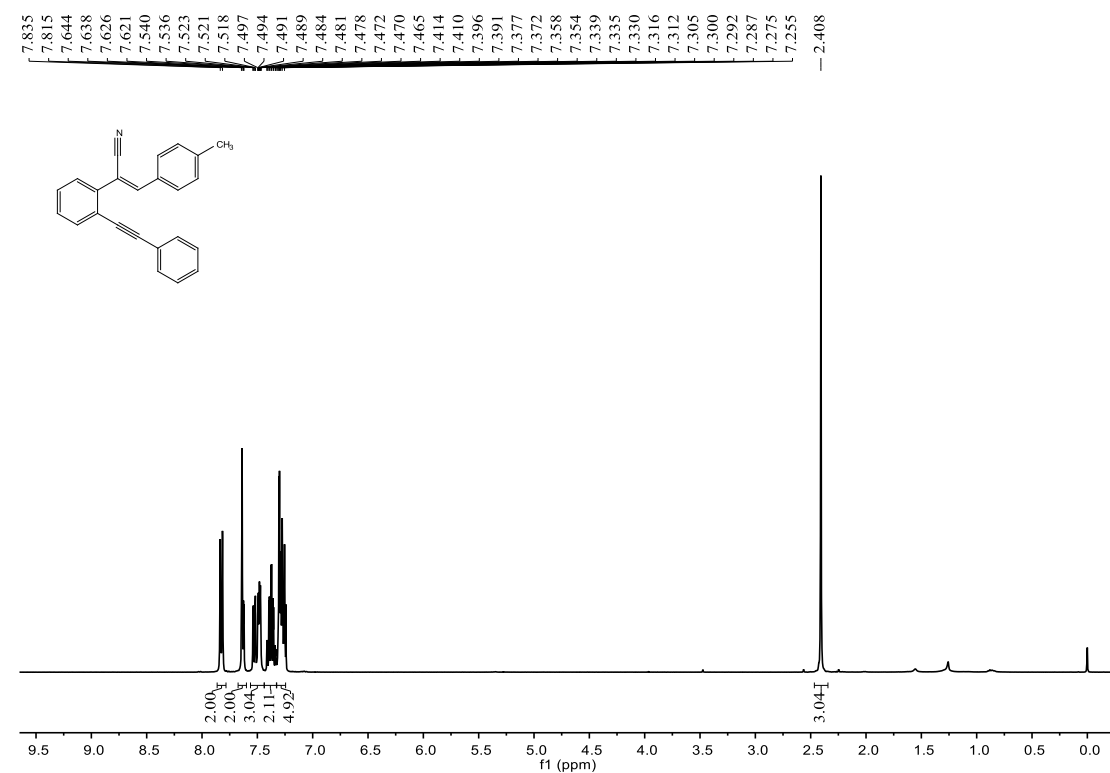

<sup>13</sup>C NMR spectra of compound **1e**.

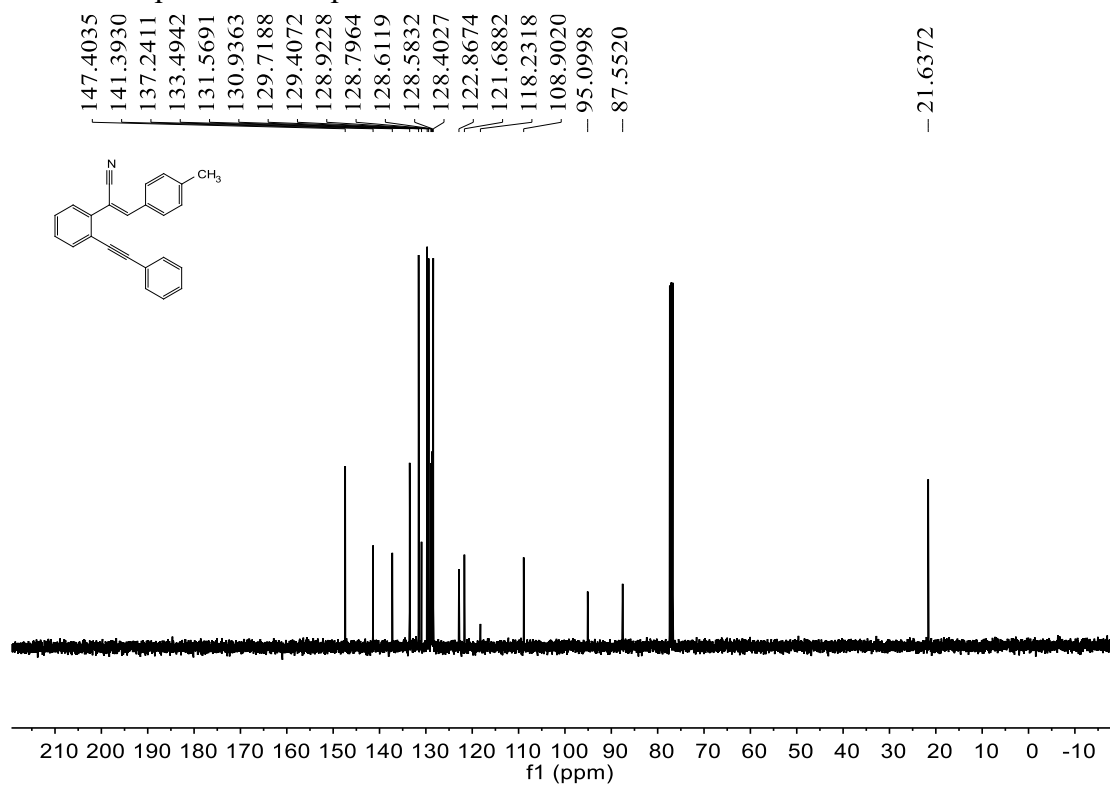

<sup>1</sup>H NMR spectra of compound **1f**.

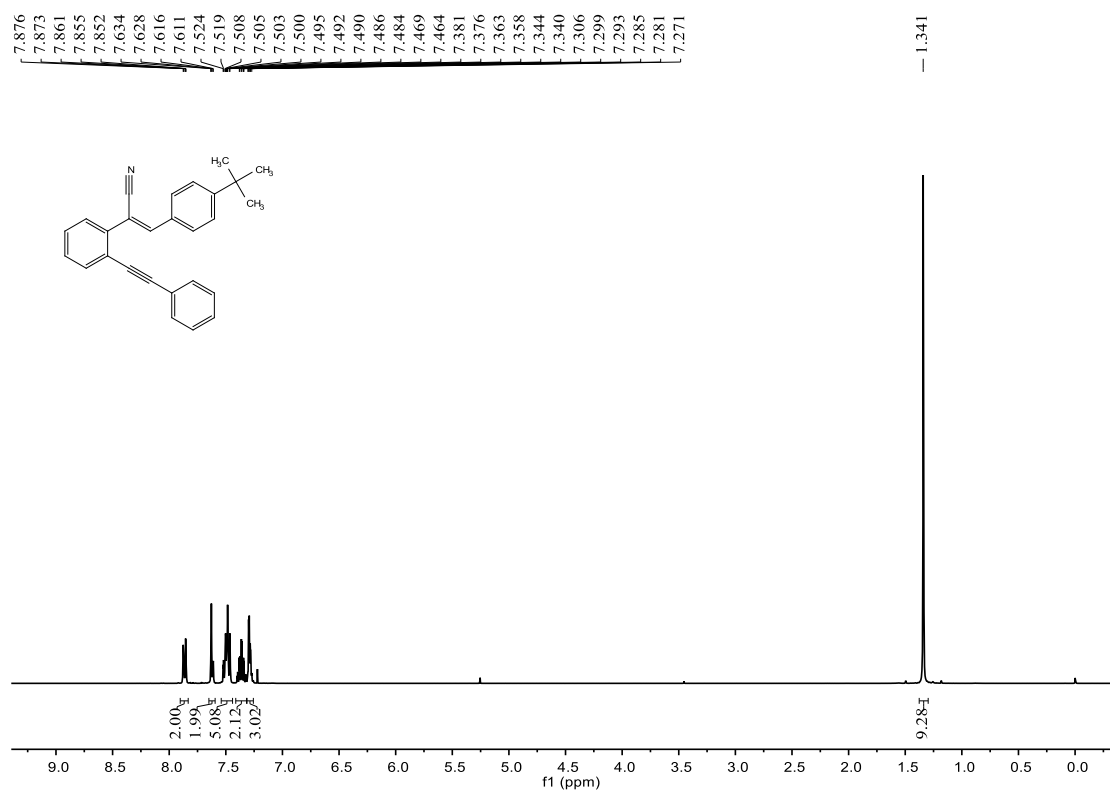

<sup>13</sup>C NMR spectra of compound **1f**.

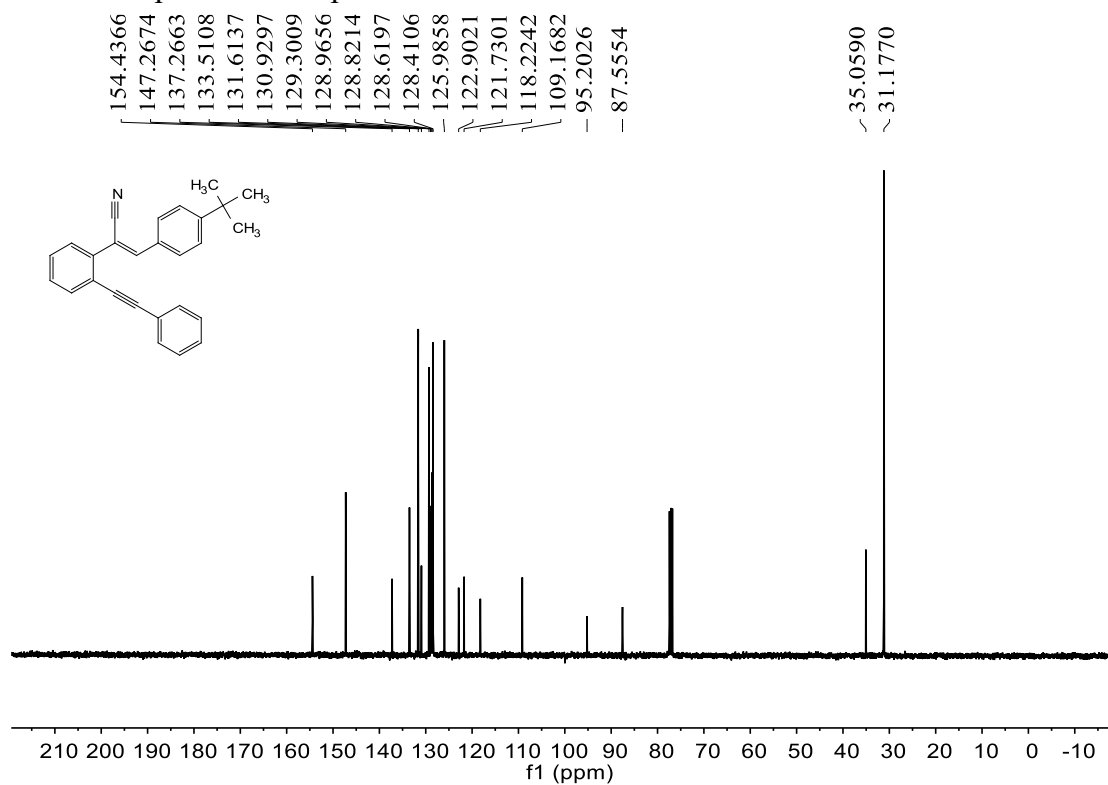

<sup>1</sup>H NMR spectra of compound **1g**.

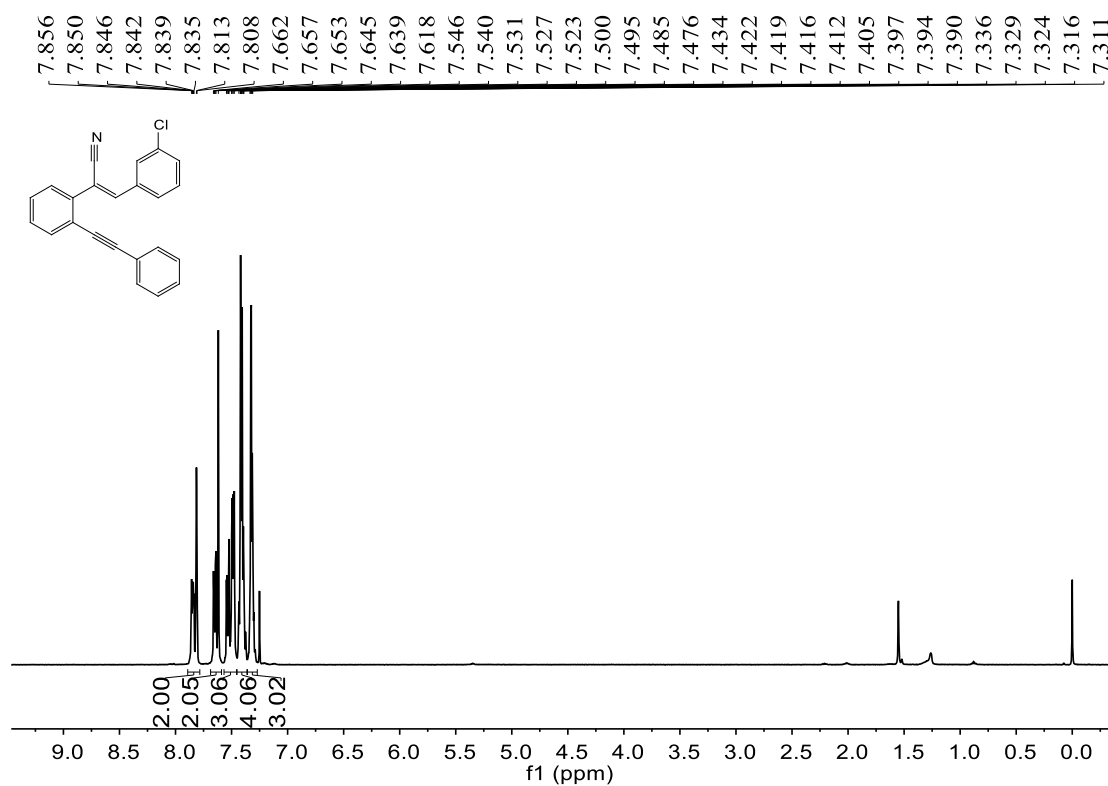

<sup>13</sup>C NMR spectra of compound **1g**.

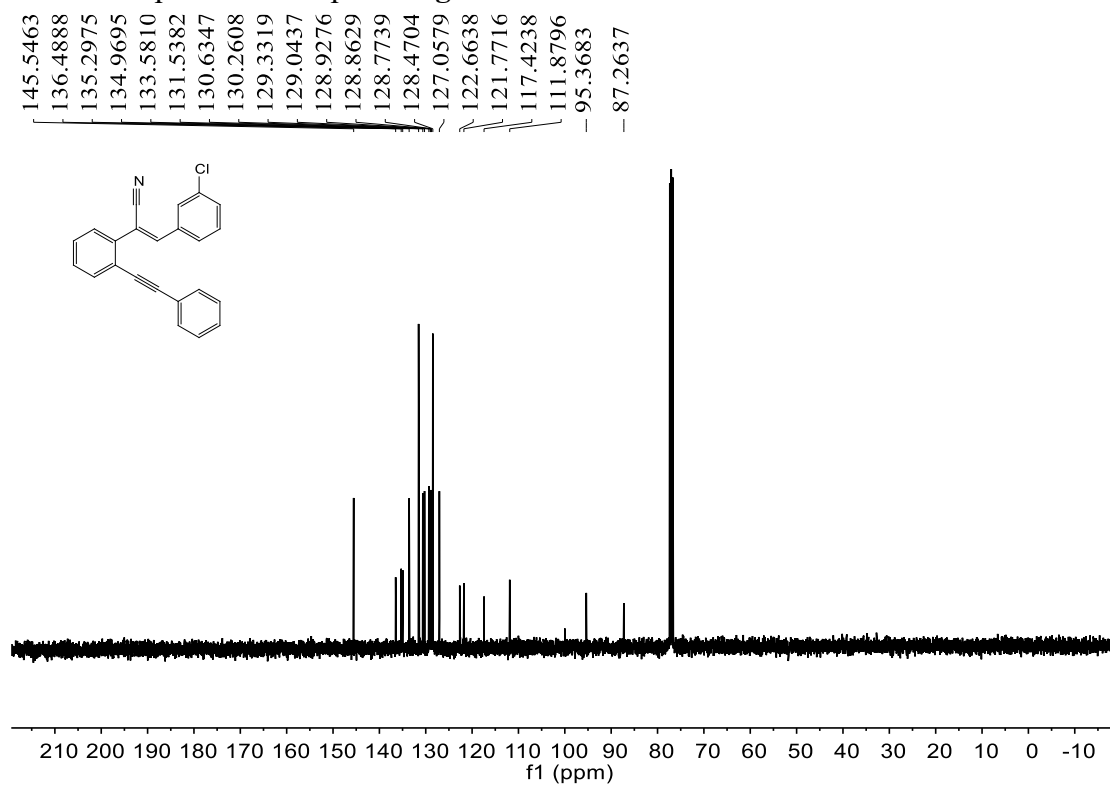

<sup>1</sup>H NMR spectra of compound **1h**.

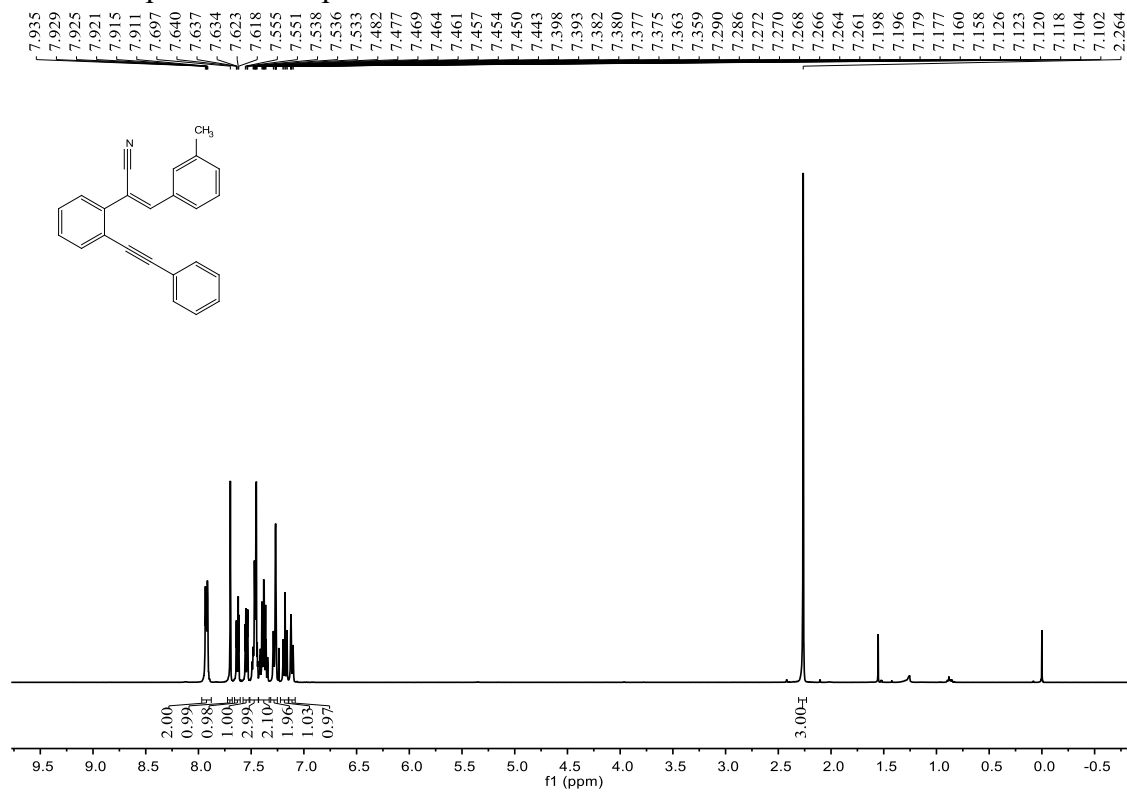

<sup>1</sup>H NMR spectra of compound **1h**.

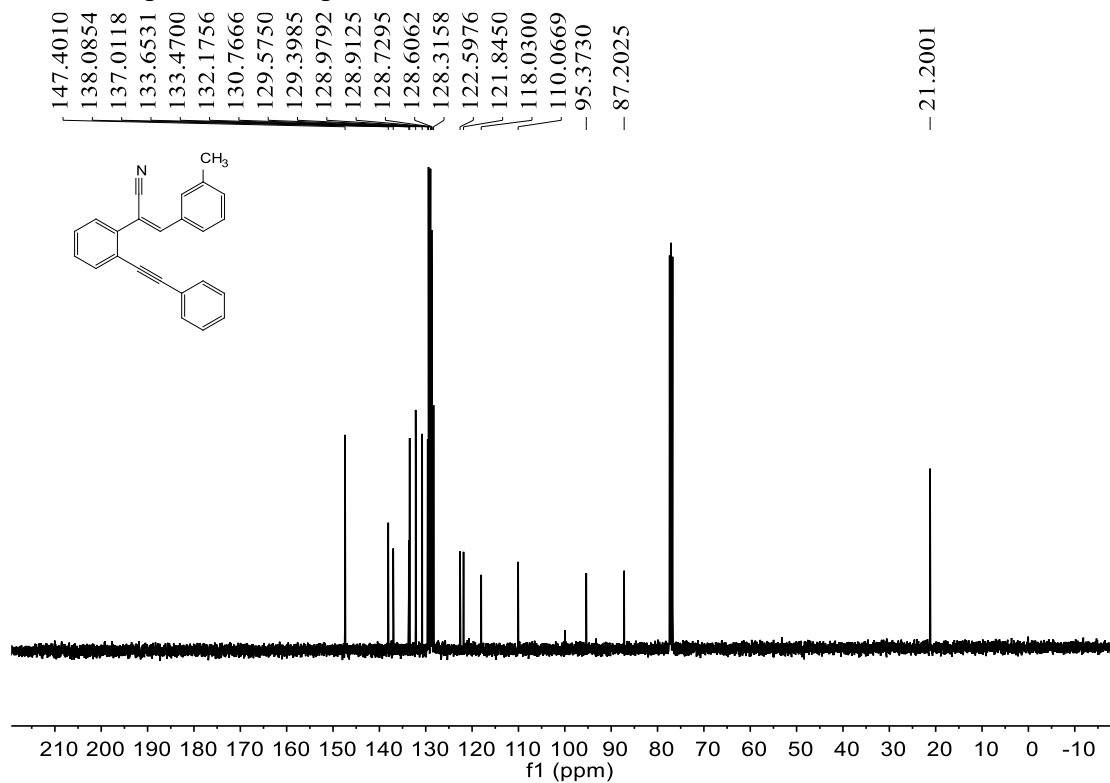

<sup>1</sup>H NMR spectra of compound **1i**.

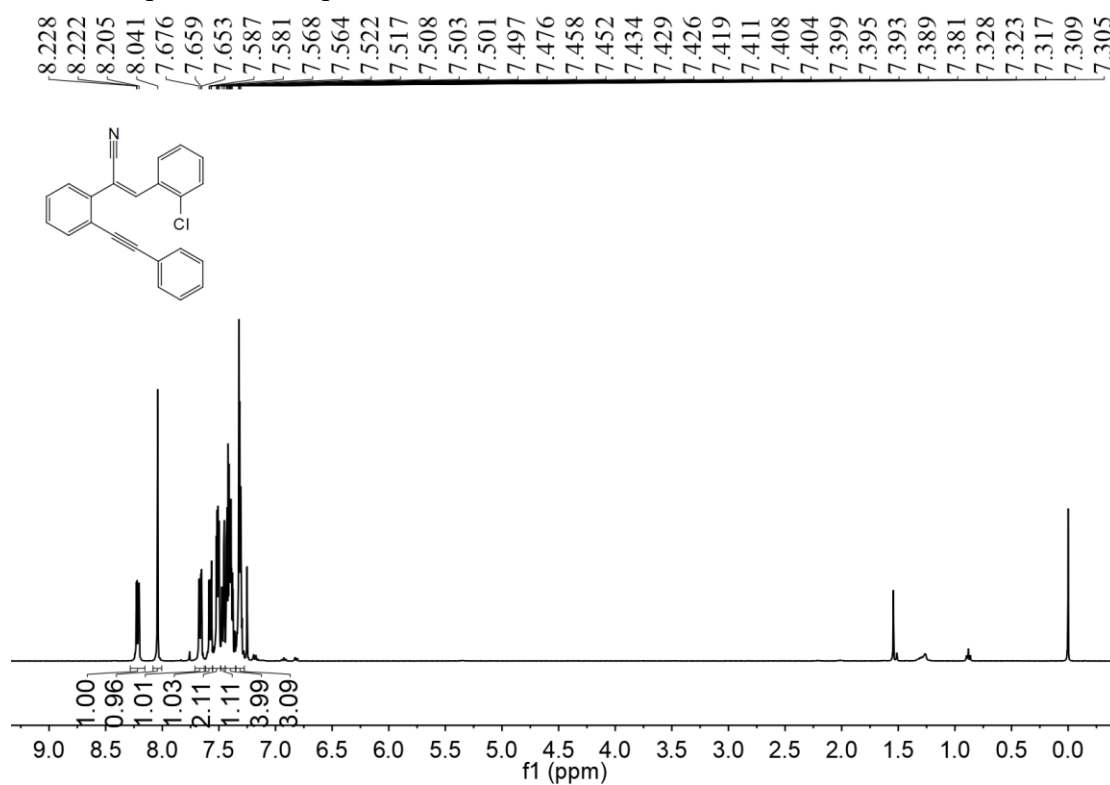

<sup>13</sup>C NMR spectra of compound **1i**.

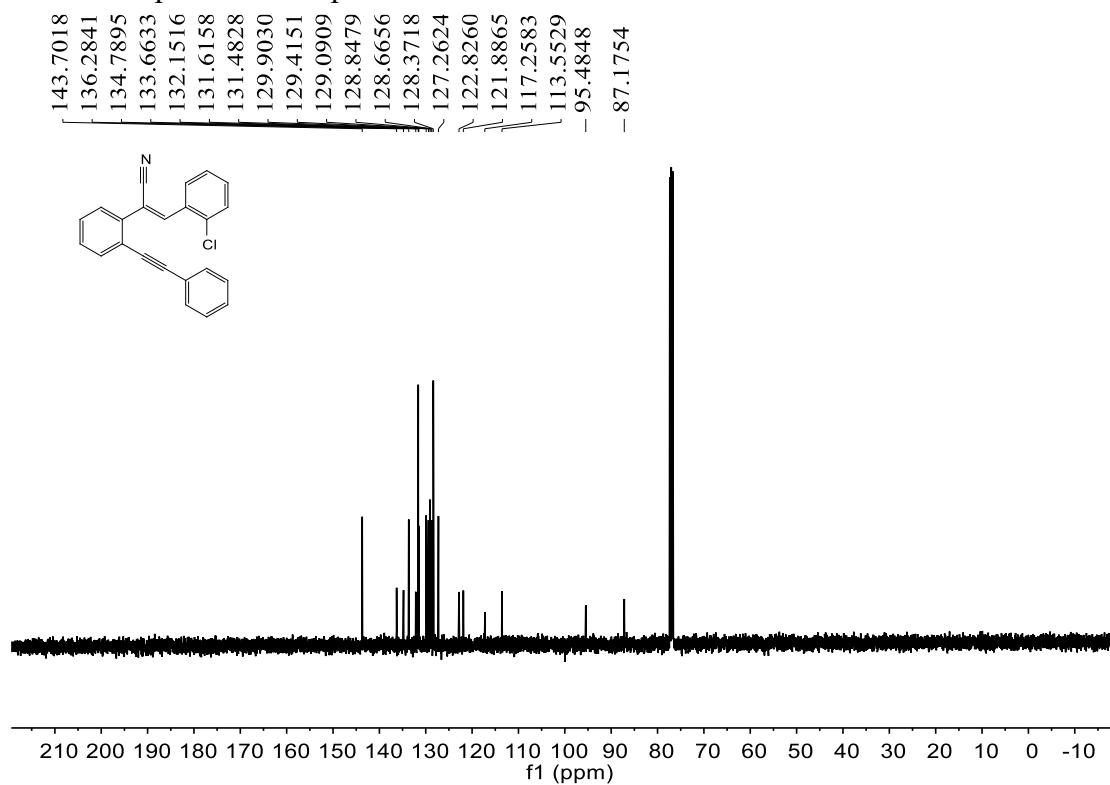

<sup>1</sup>H NMR spectra of compound **1j**.

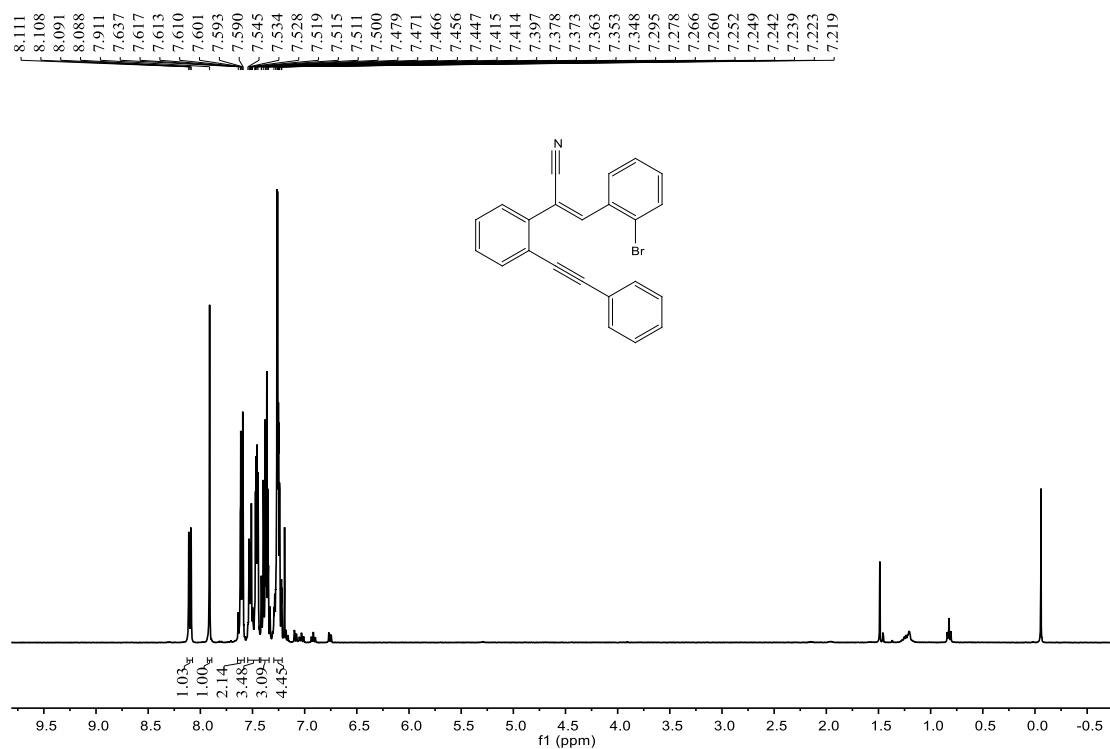

<sup>13</sup>C NMR spectra of compound **1j**.

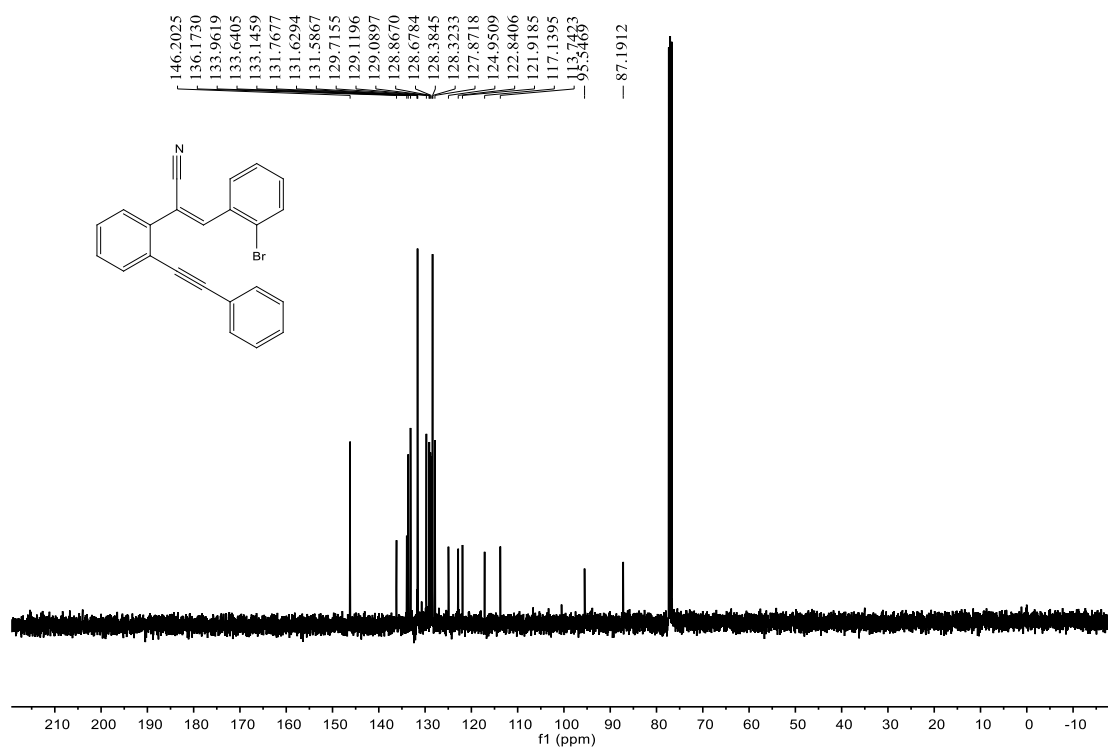

<sup>1</sup>H NMR spectra of compound **1k**.

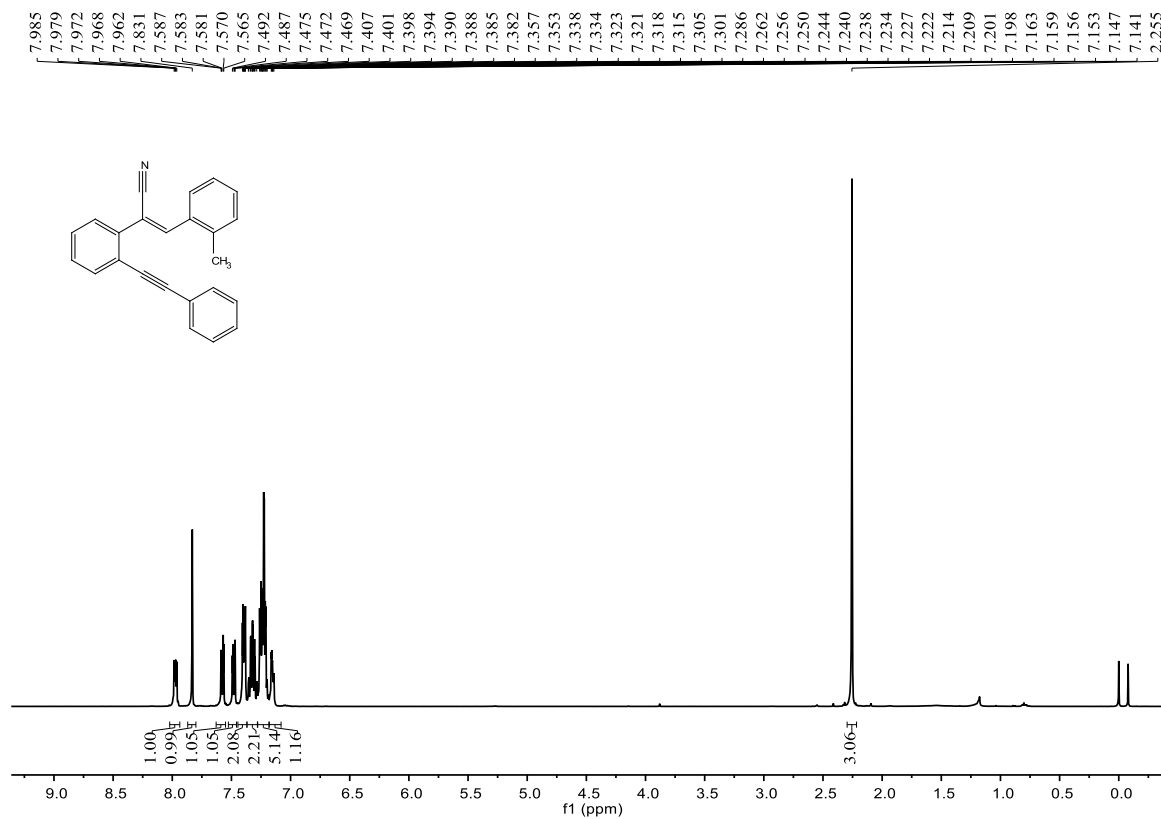

<sup>13</sup>C NMR spectra of compound **1k**.

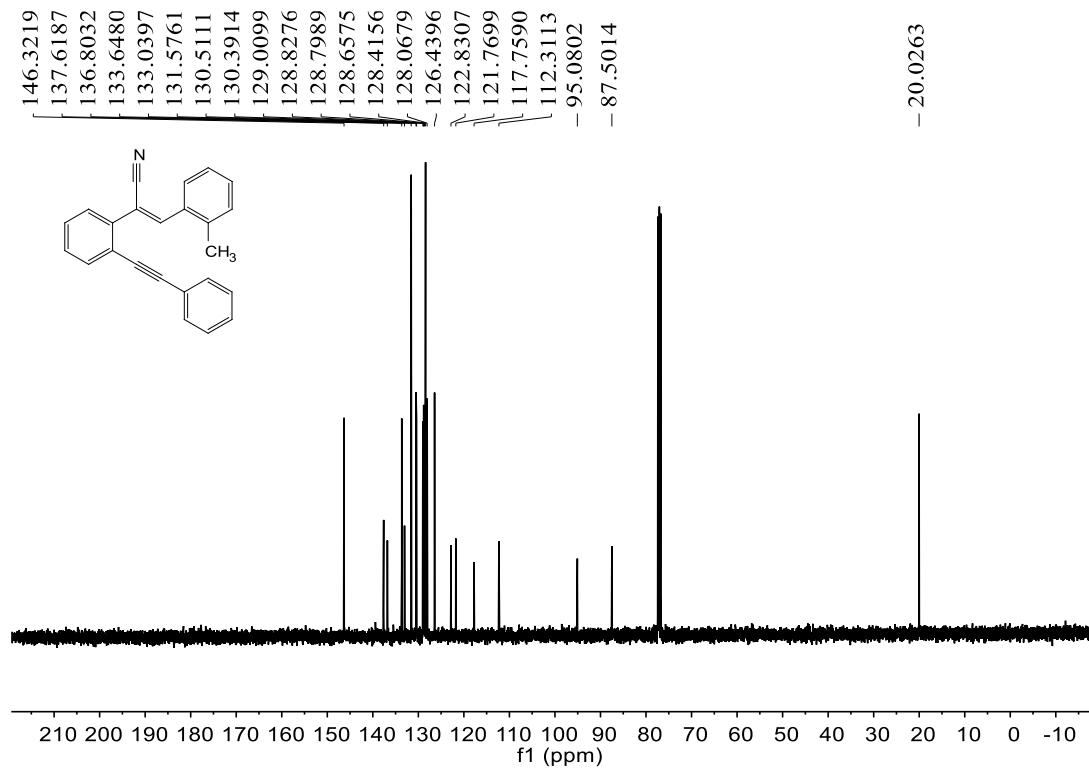

<sup>1</sup>H NMR spectra of compound **1l**.

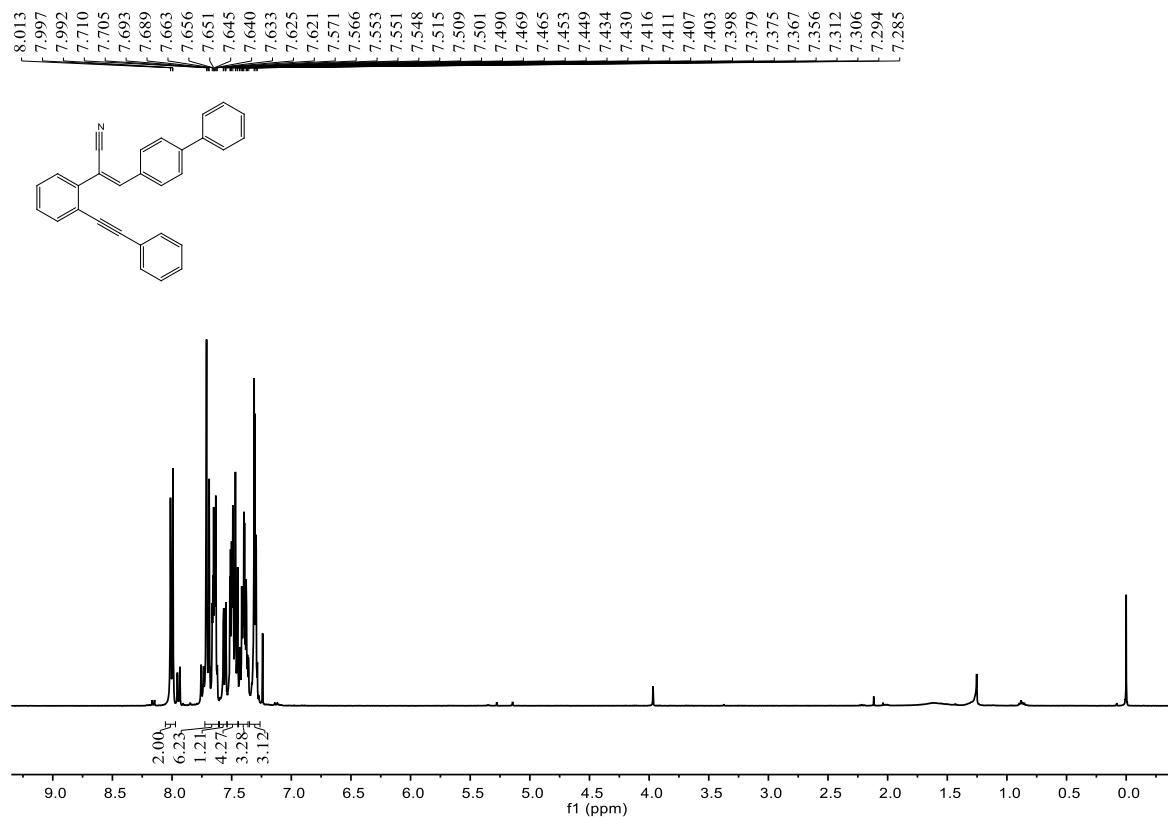

<sup>13</sup>C NMR spectra of compound **1l**.

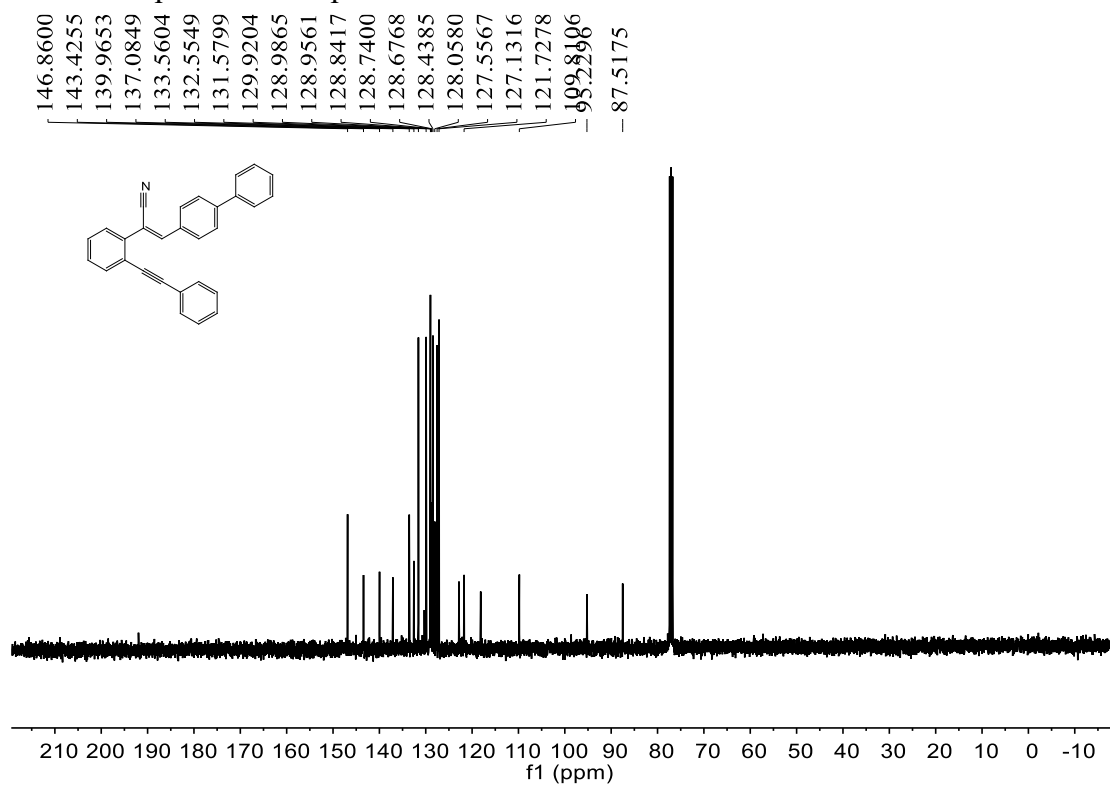

<sup>1</sup>H NMR spectra of compound **1m**.

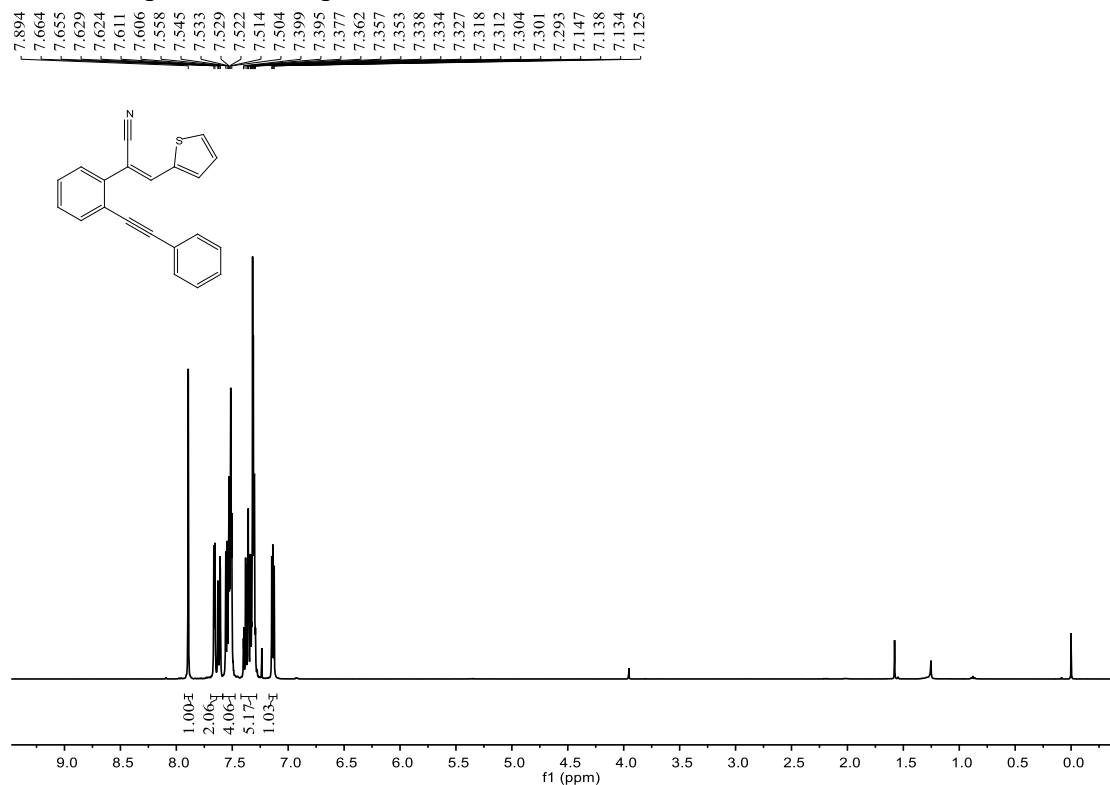

<sup>13</sup>C NMR spectra of compound **1m**.

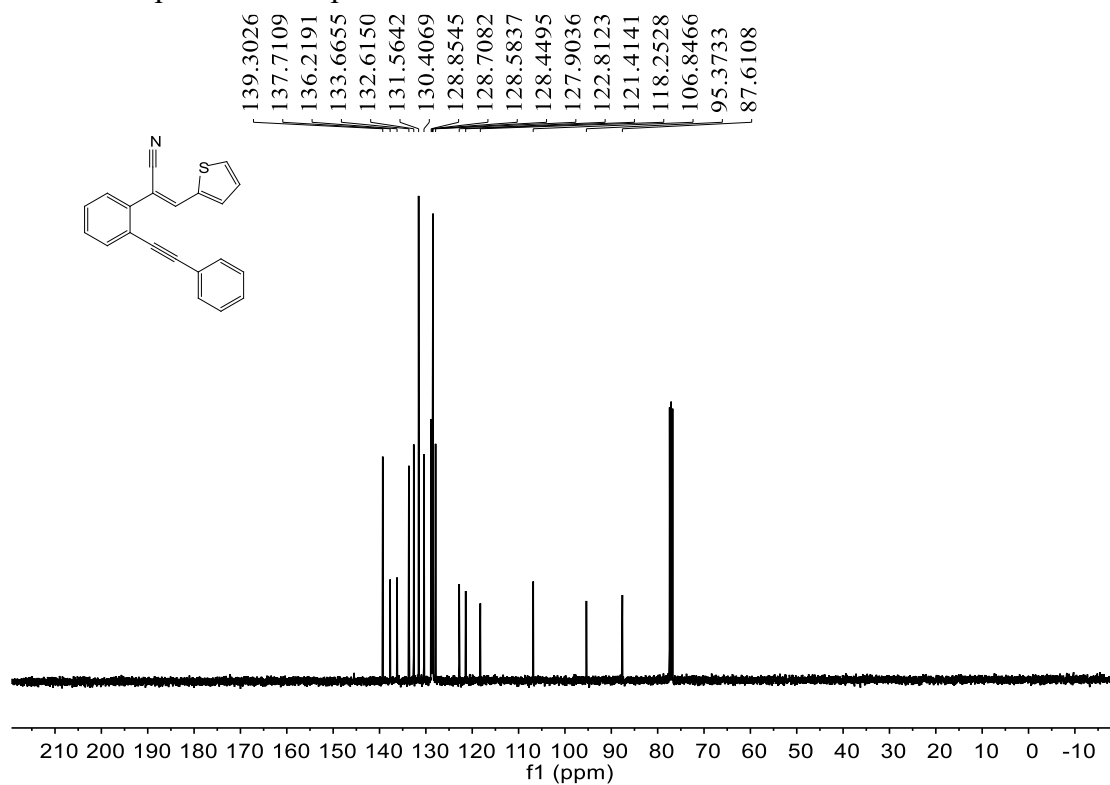

<sup>1</sup>H NMR spectra of compound **1n**.

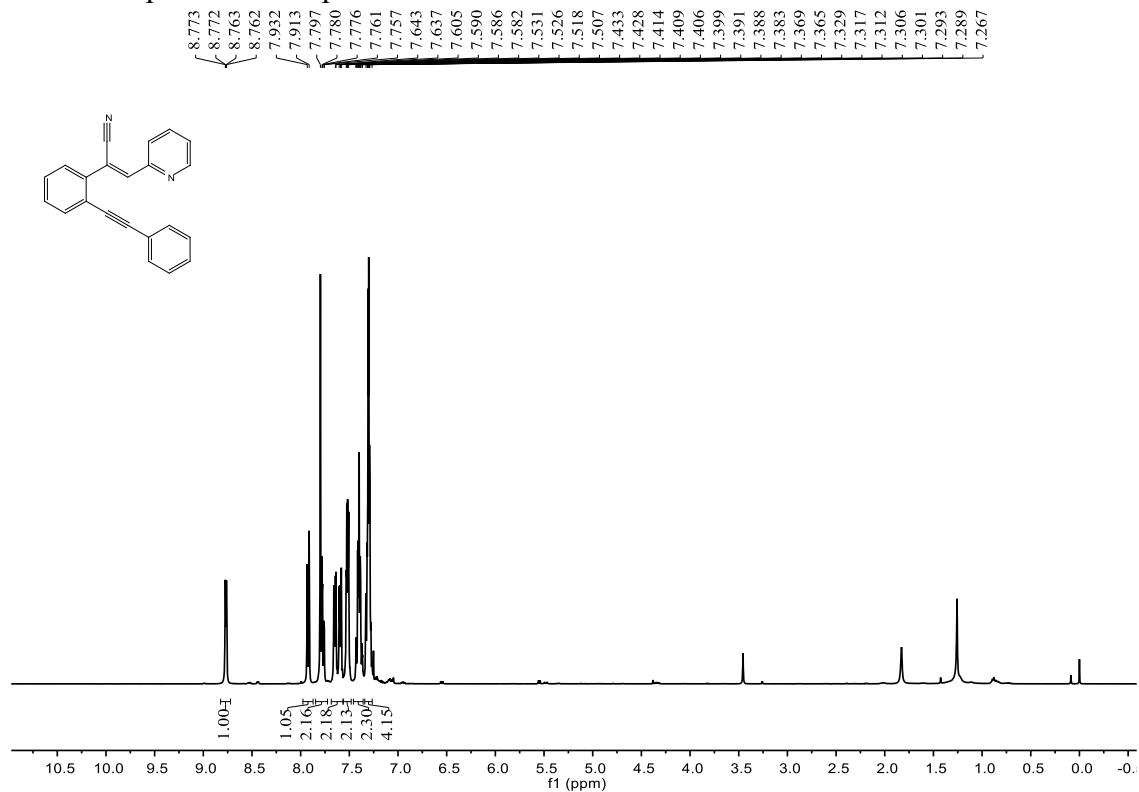

<sup>13</sup>C NMR spectra of compound **1n**.

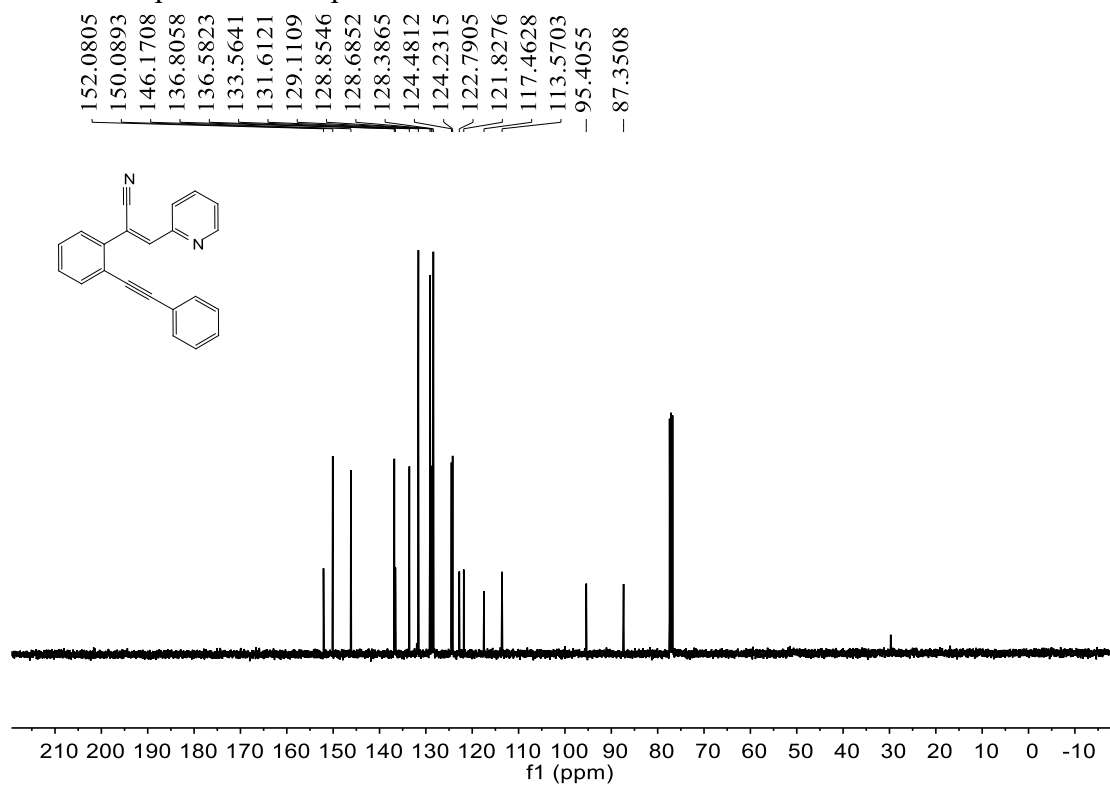

<sup>1</sup>H NMR spectra of compound **1o**.

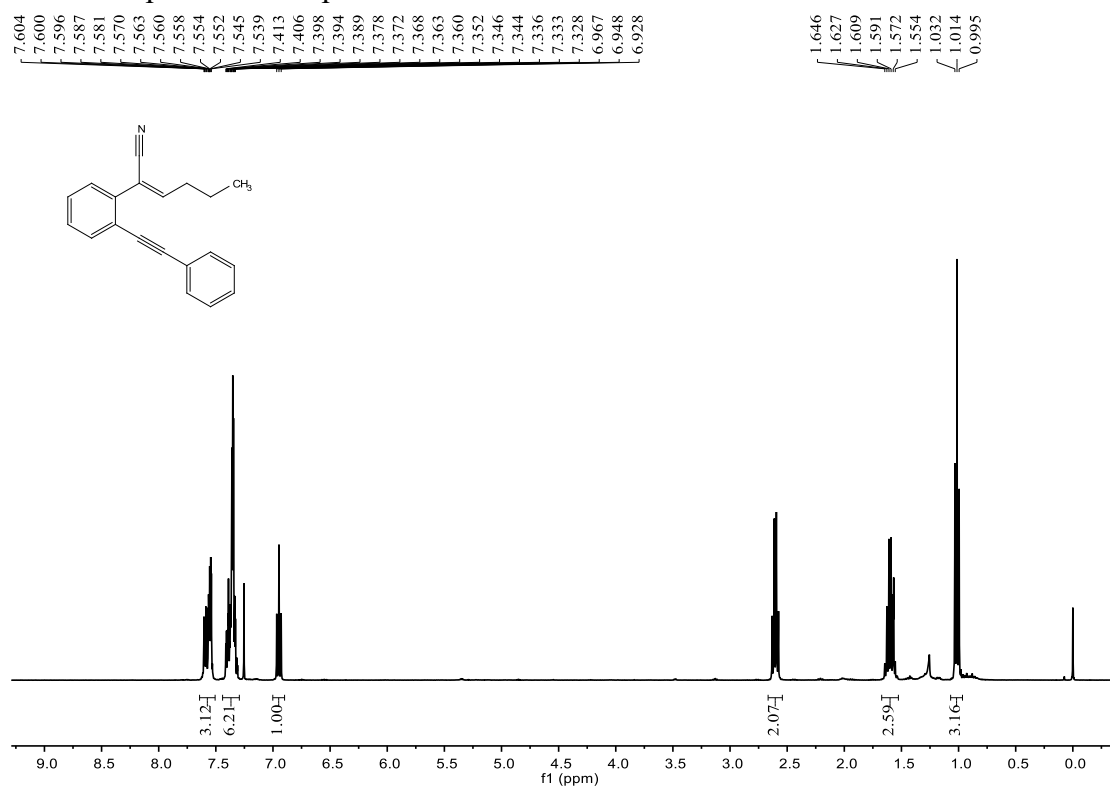

<sup>13</sup>C NMR spectra of compound **1o**.

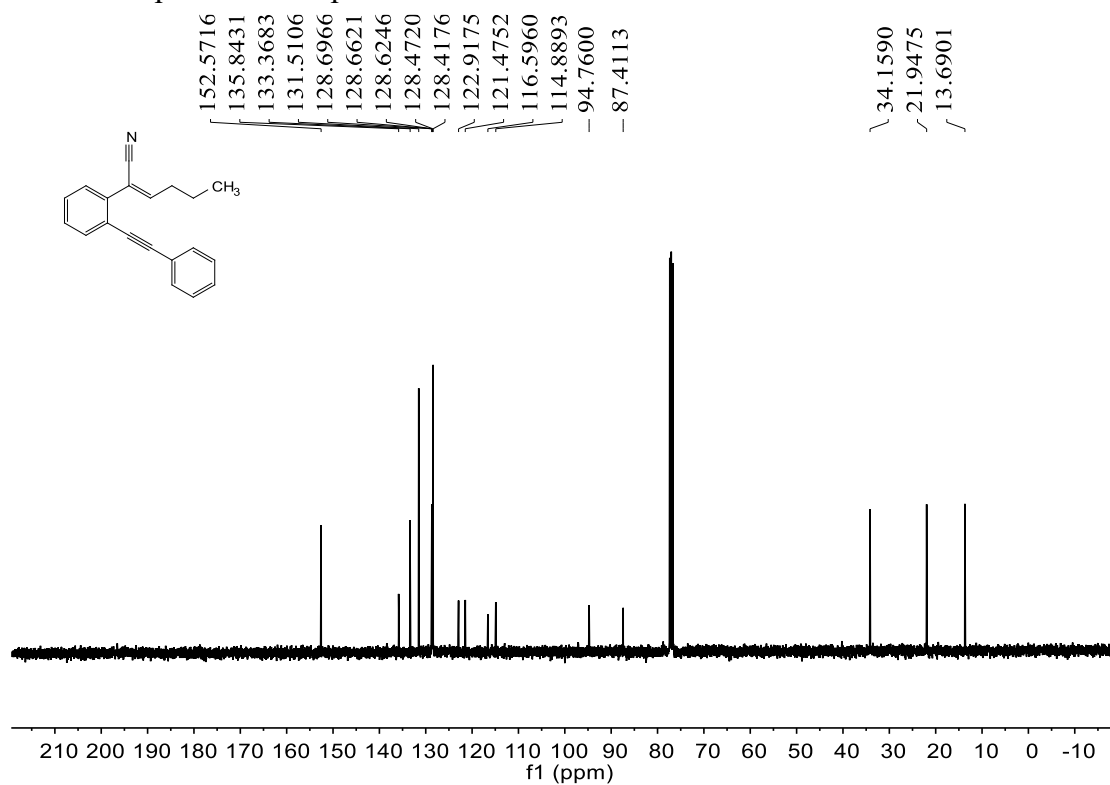

<sup>1</sup>H NMR spectra of compound **1p**.

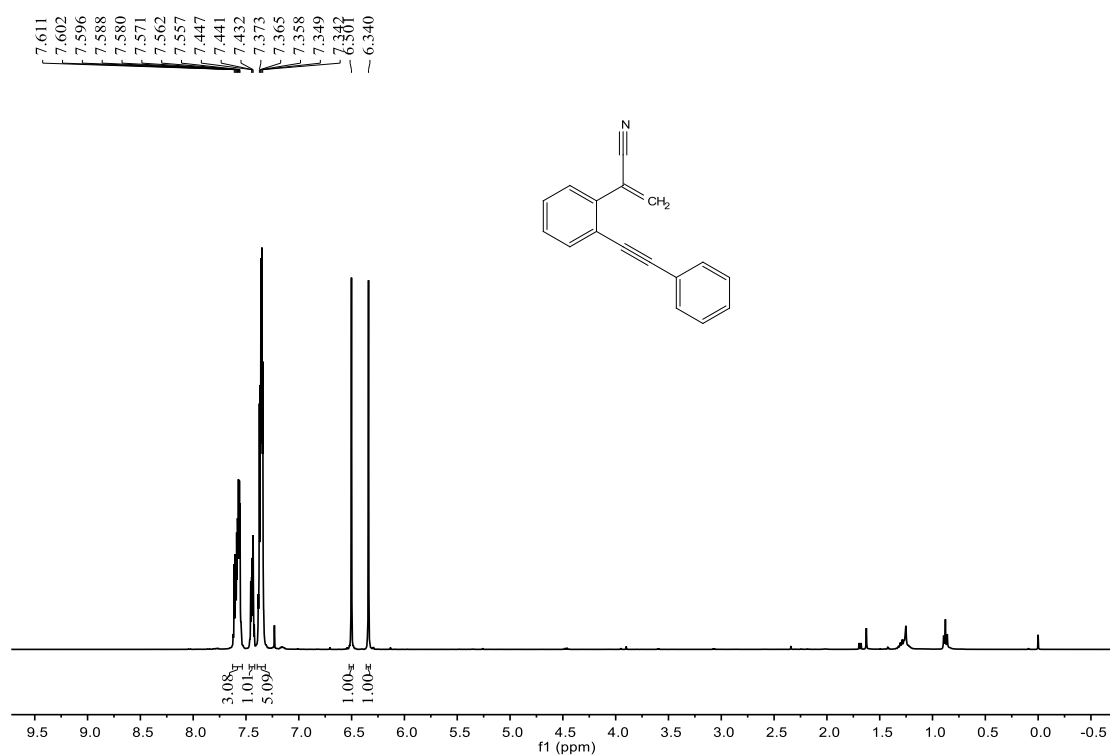

<sup>13</sup>C NMR spectra of compound **1p**.

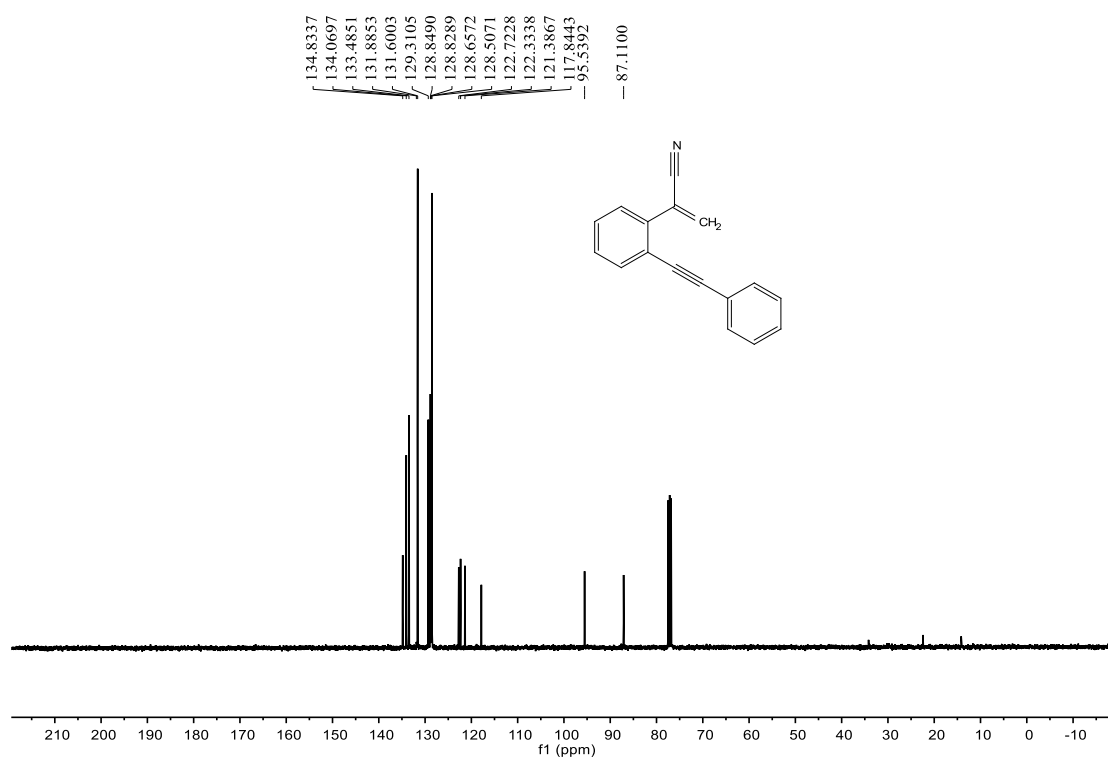

<sup>1</sup>H NMR spectra of compound **1q**.

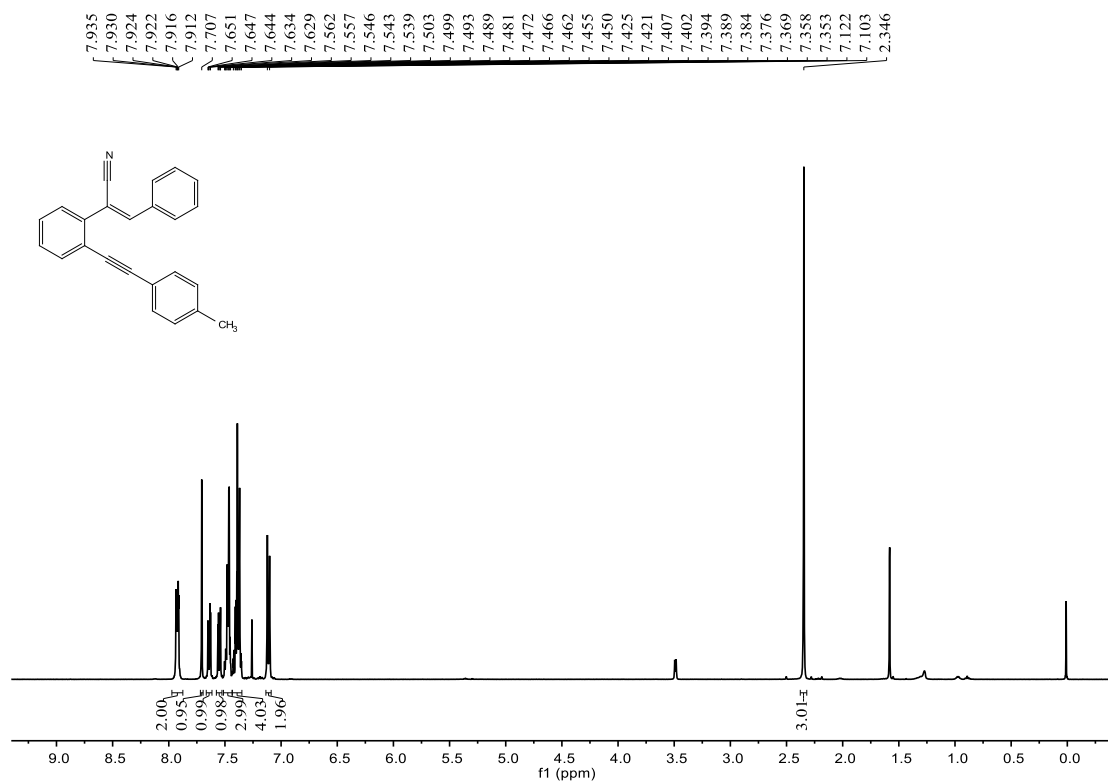

<sup>13</sup>C NMR spectra of compound **1q**.

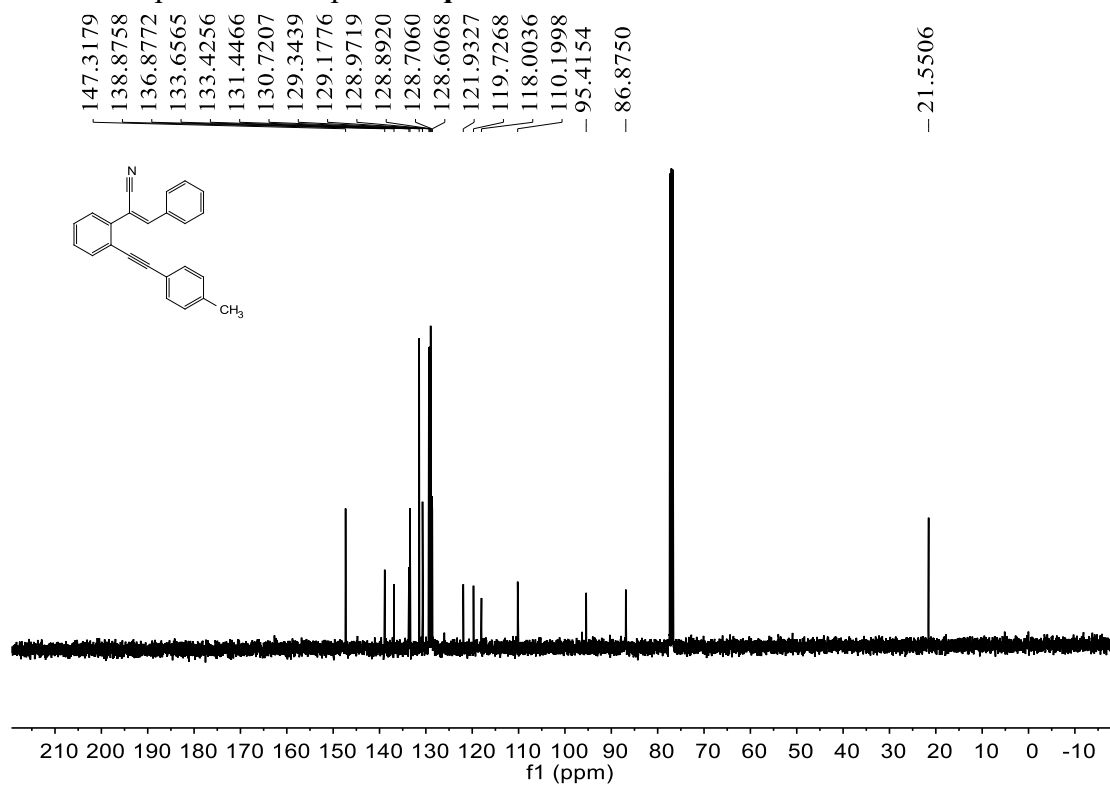

<sup>1</sup>H NMR spectra of compound **1r**.

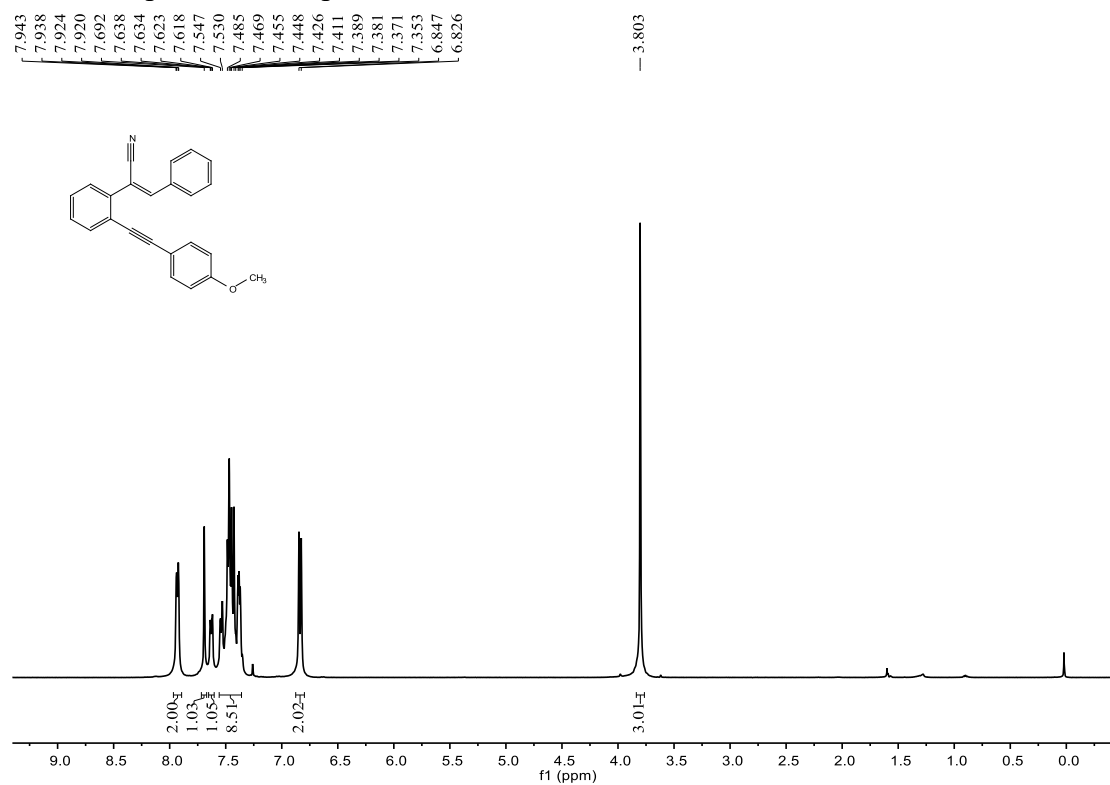

<sup>13</sup>C NMR spectra of compound **1r**.

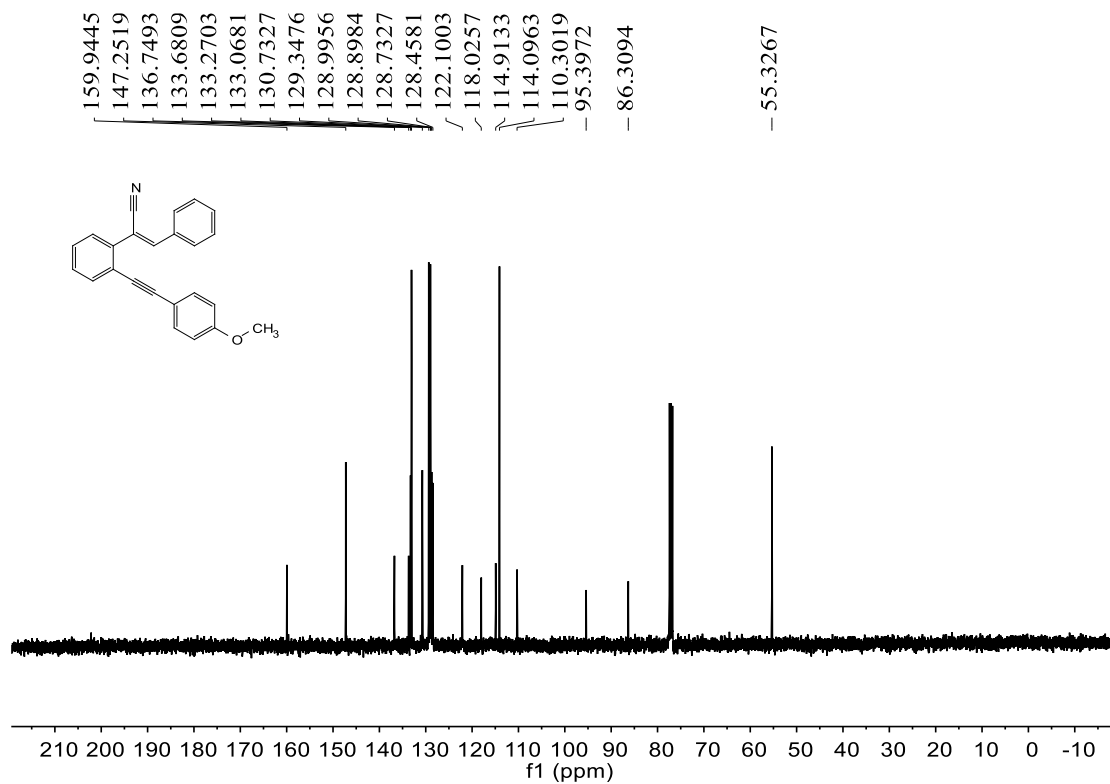

<sup>1</sup>H NMR spectra of compound **1s**.

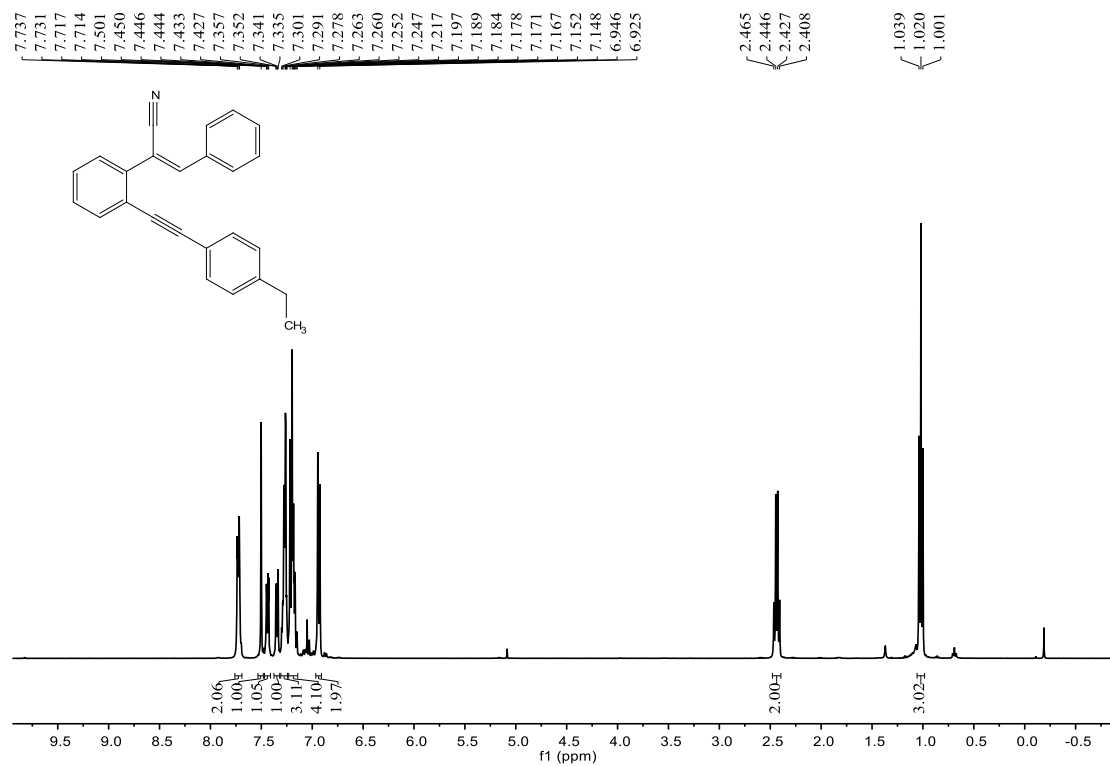

### <sup>13</sup>C NMR spectra of compound **1s**.

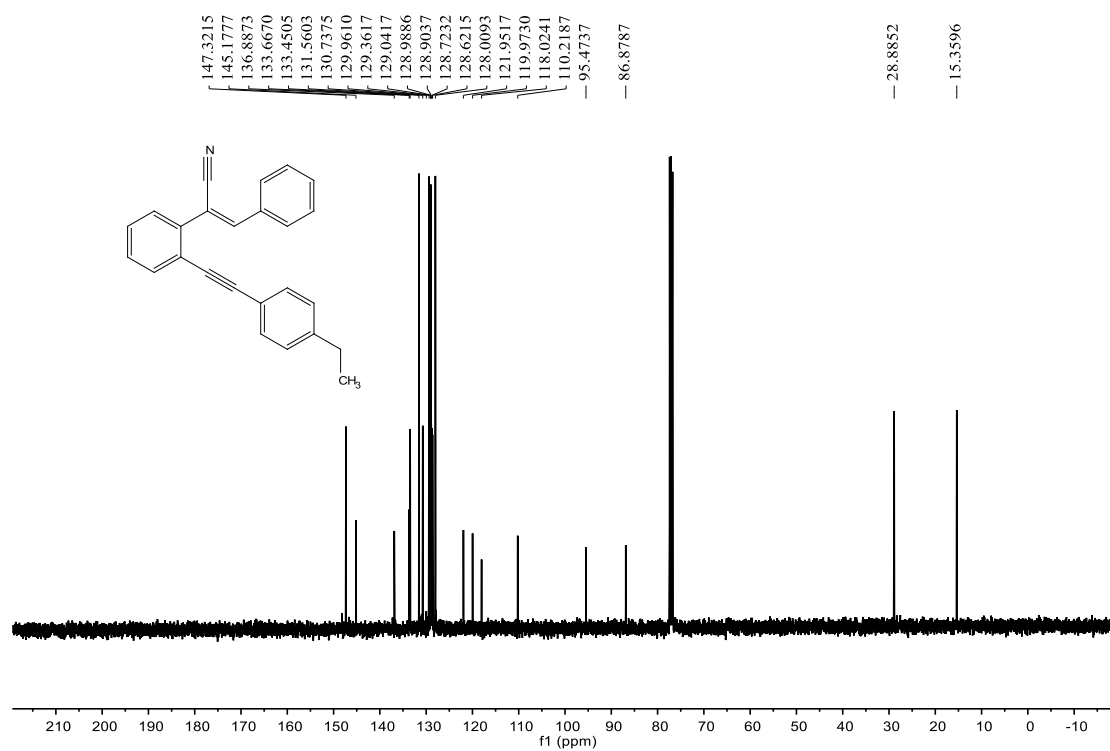

### <sup>1</sup>H NMR spectra of compound **1t**.

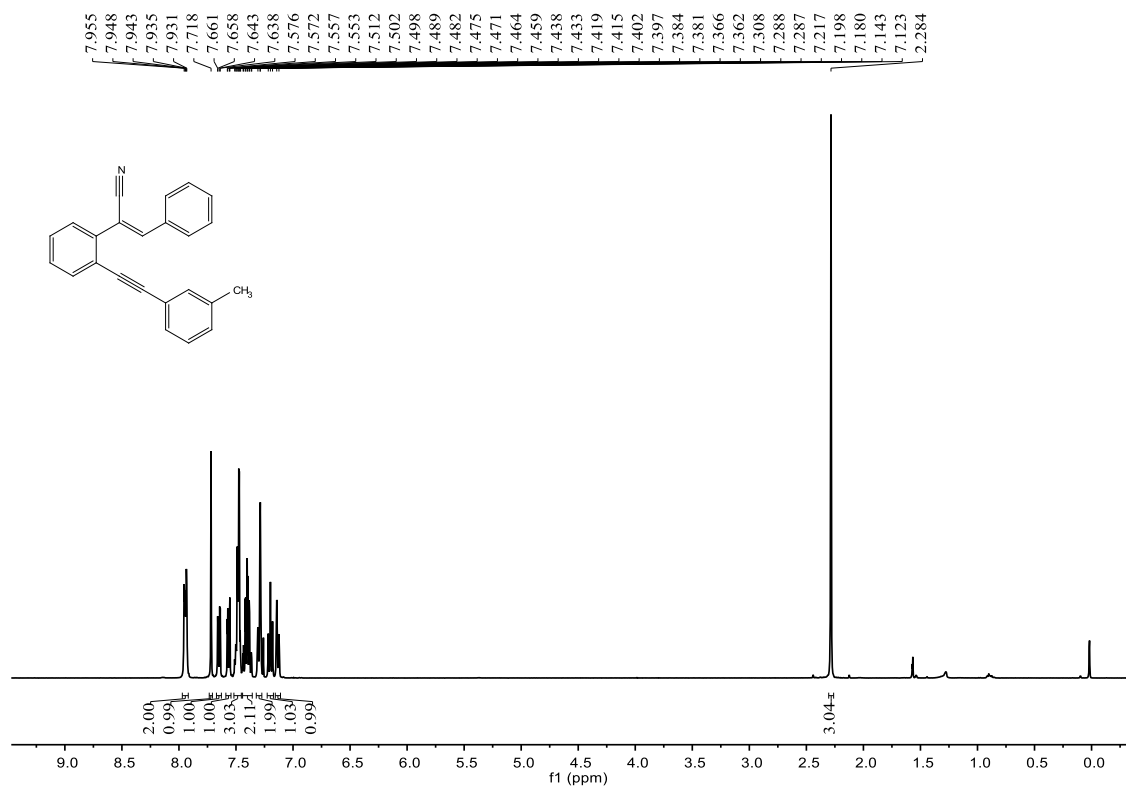

<sup>13</sup>C NMR spectra of compound **1t**.

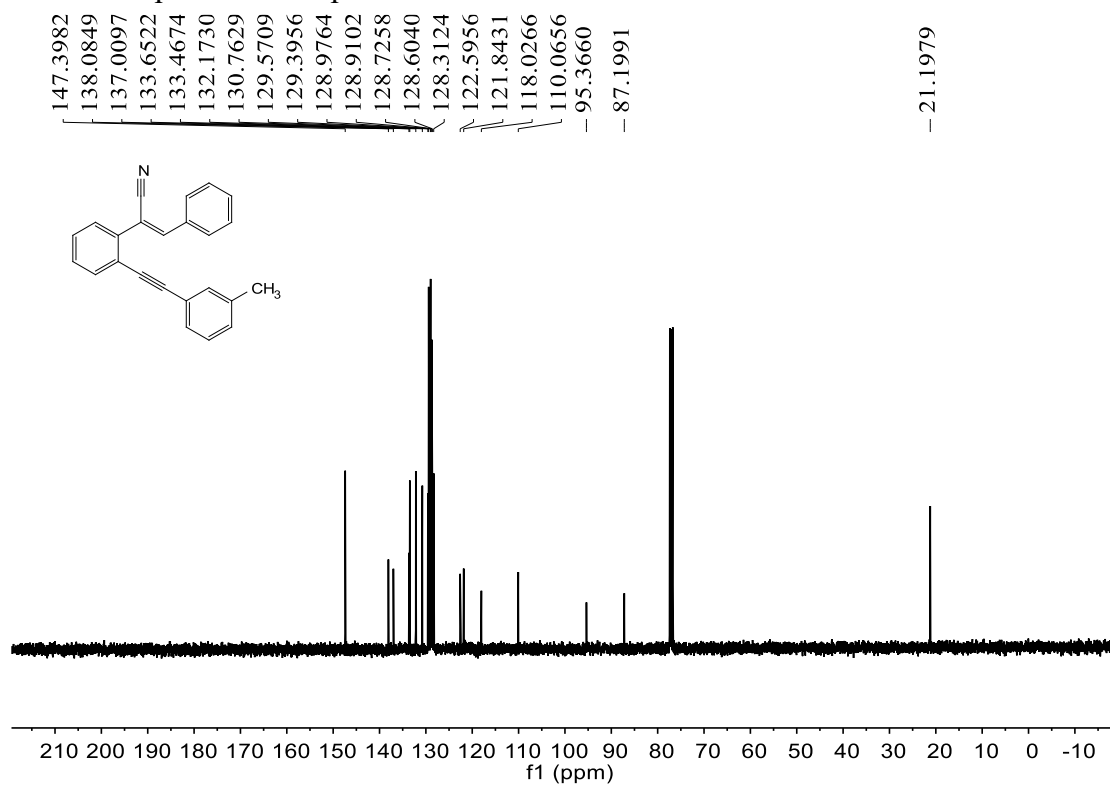

<sup>1</sup>H NMR spectra of compound **1u**.

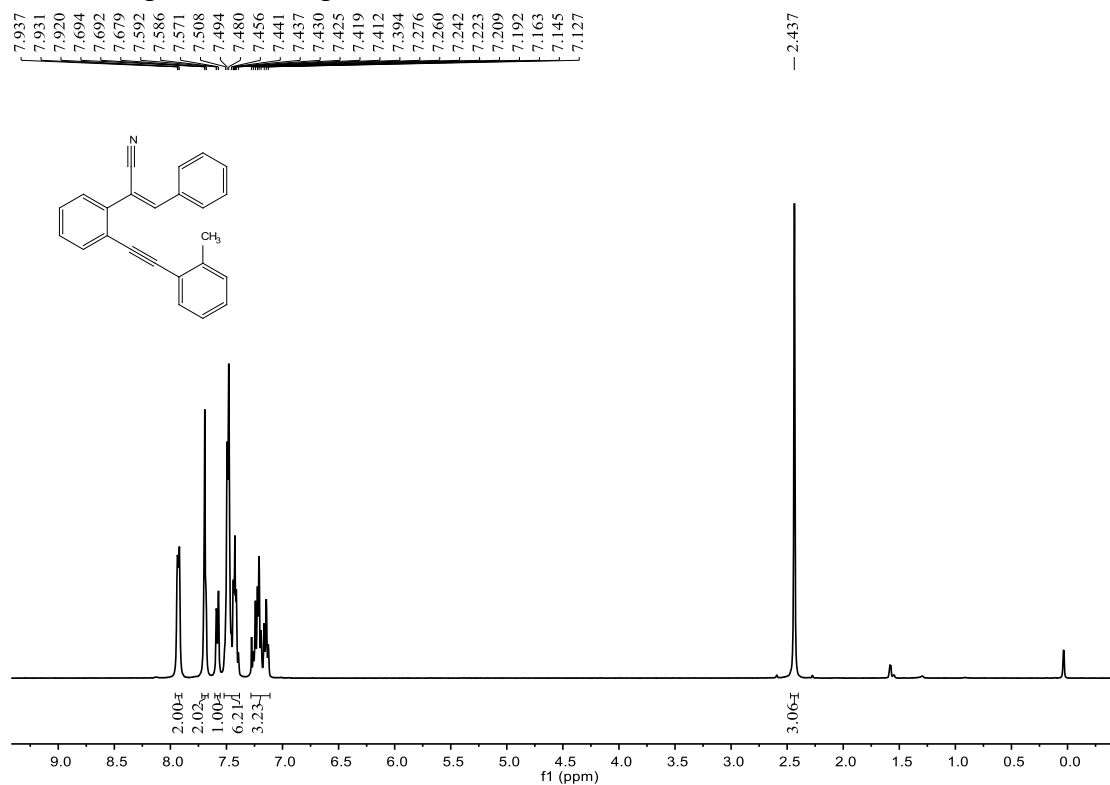

<sup>13</sup>C NMR spectra of compound **1u**.

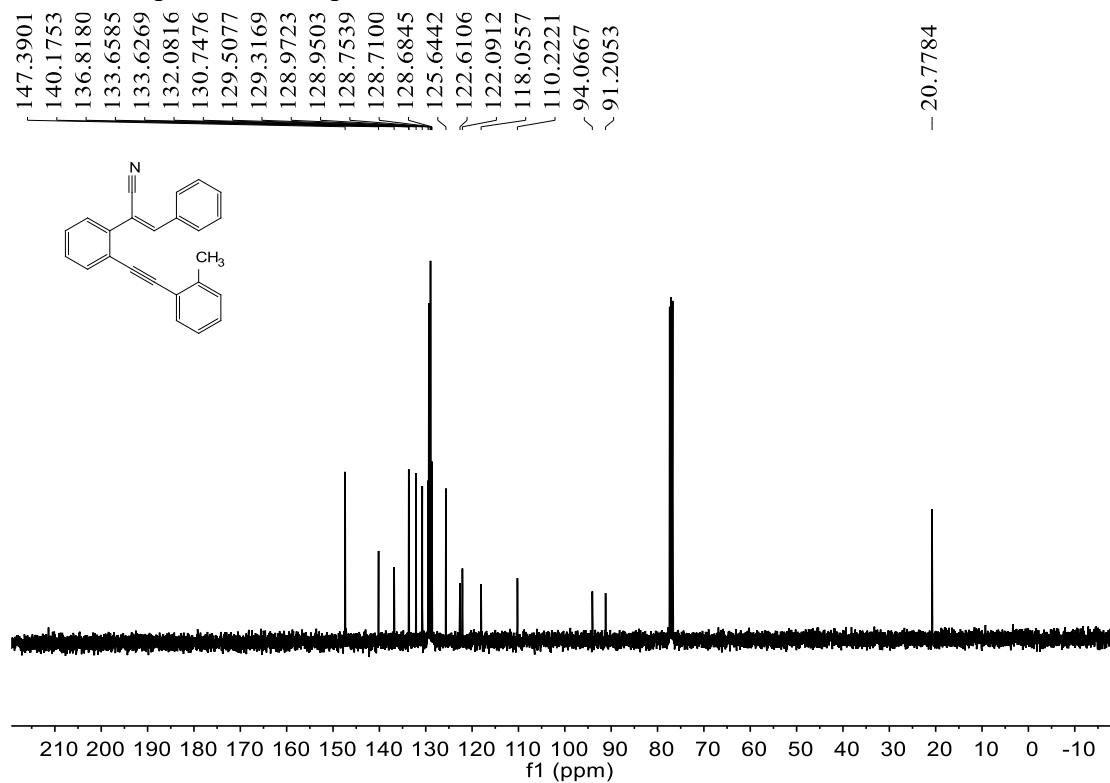

<sup>1</sup>H NMR spectra of compound **1v**.

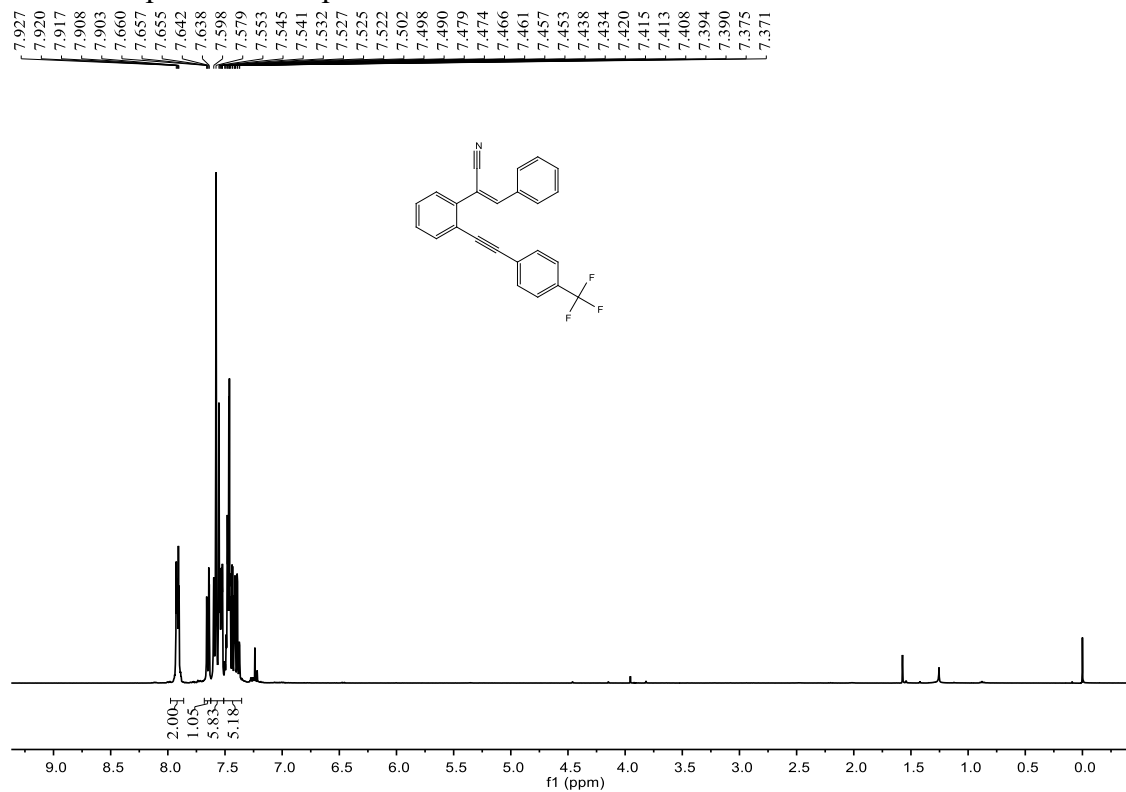

<sup>13</sup>C NMR spectra of compound **1v**.

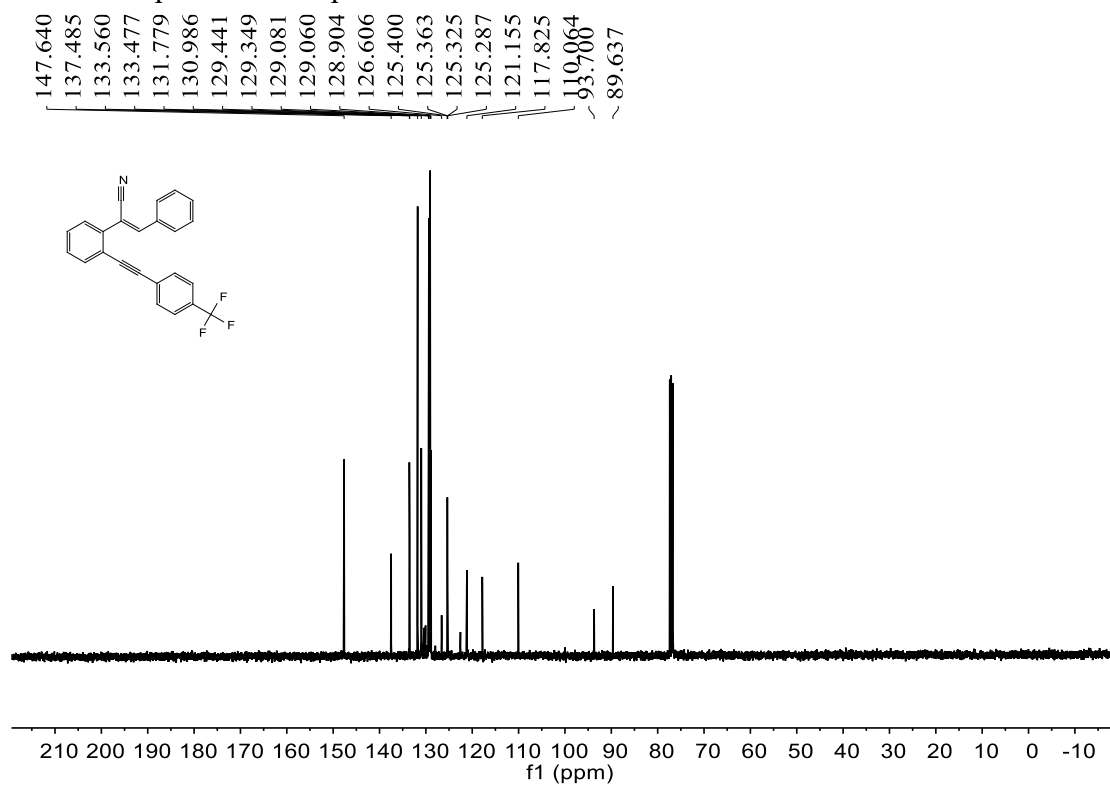

<sup>19</sup>F NMR spectra of compound **1v**.

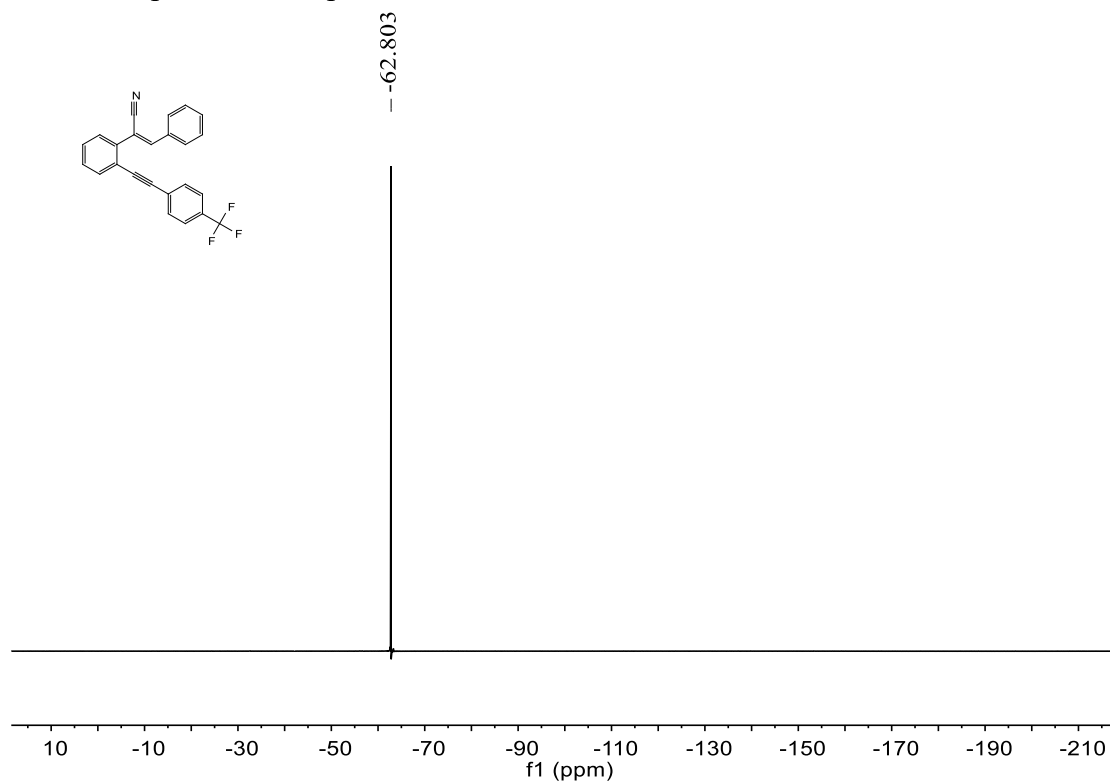

### <sup>1</sup>H NMR spectra of compound 1w.

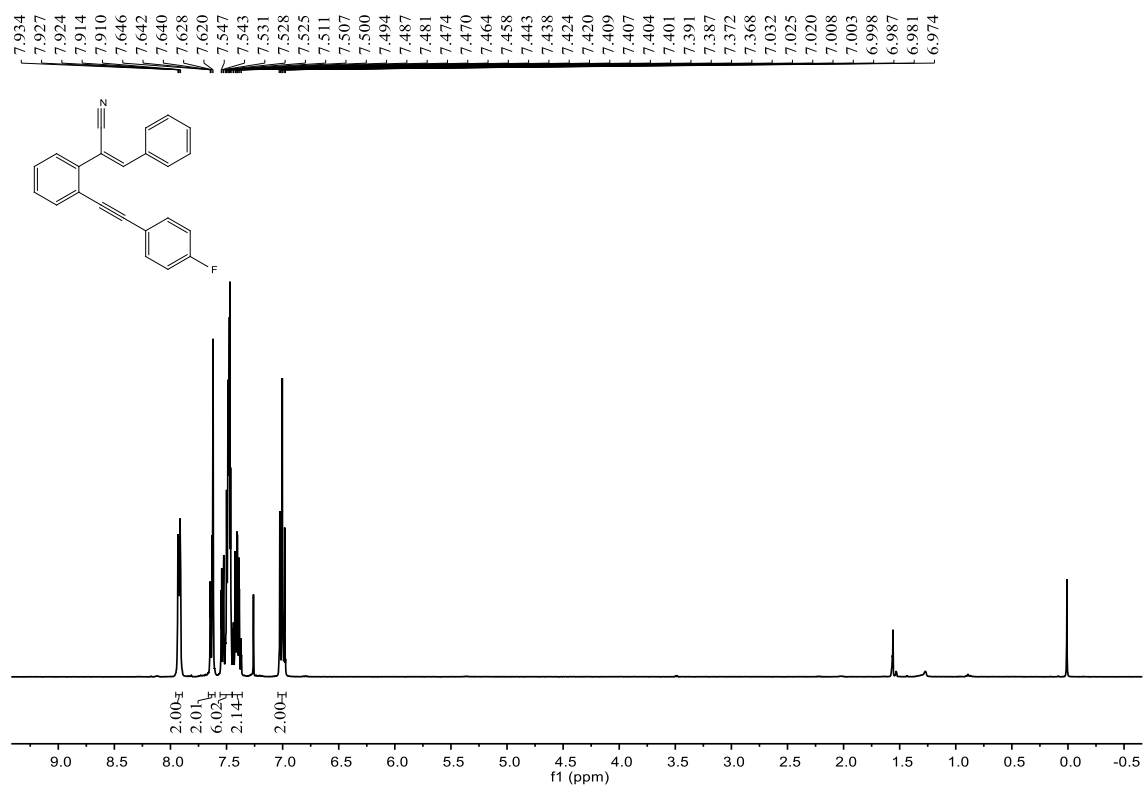

### <sup>13</sup>C NMR spectra of compound 1w.

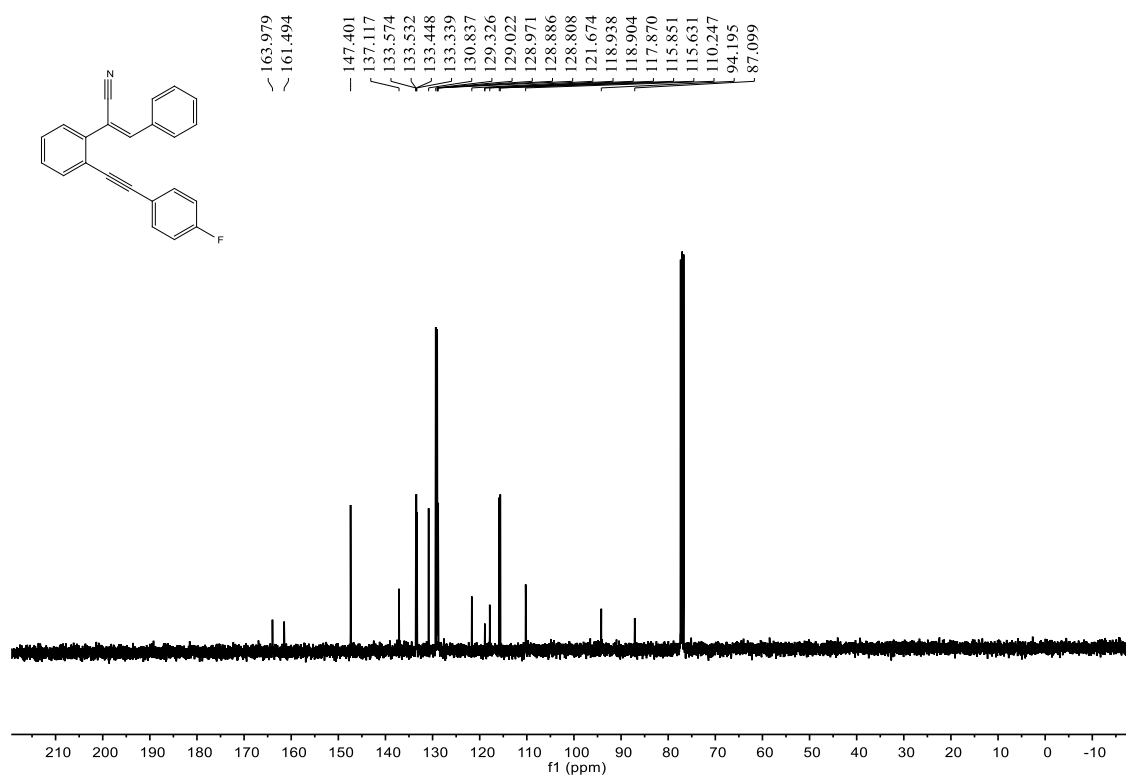

<sup>19</sup>F NMR spectra of compound **1w**.

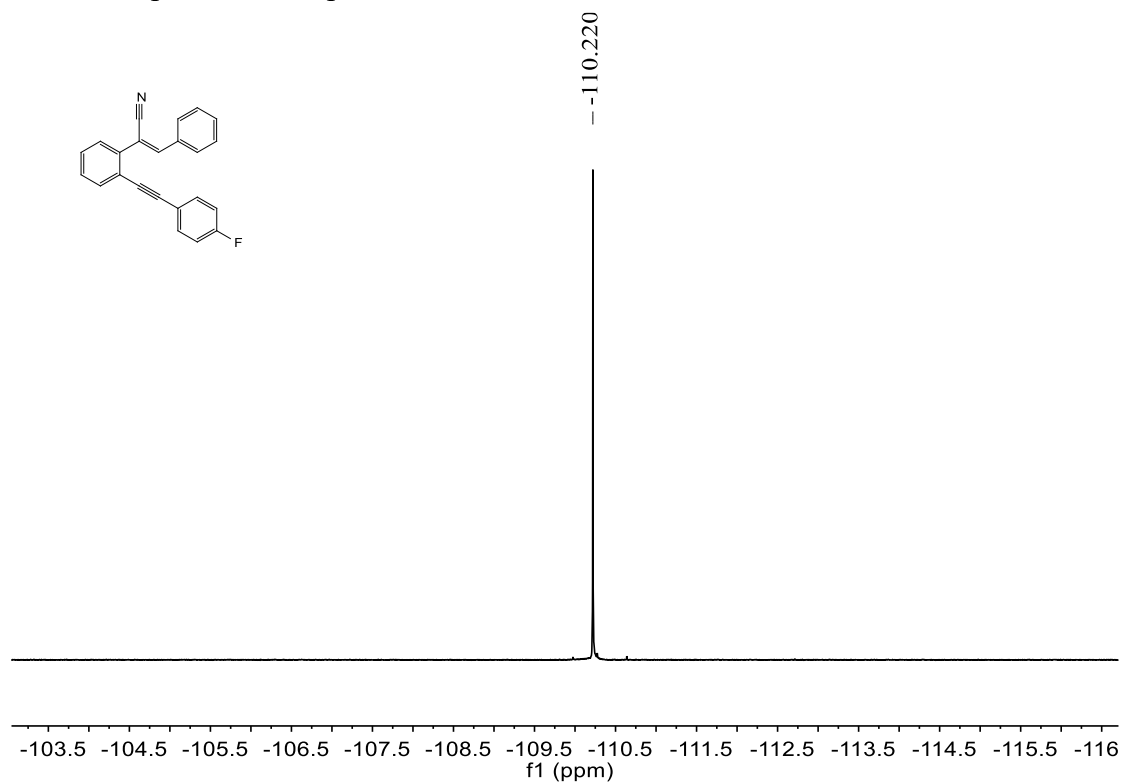

<sup>1</sup>H NMR spectra of compound **1x**.

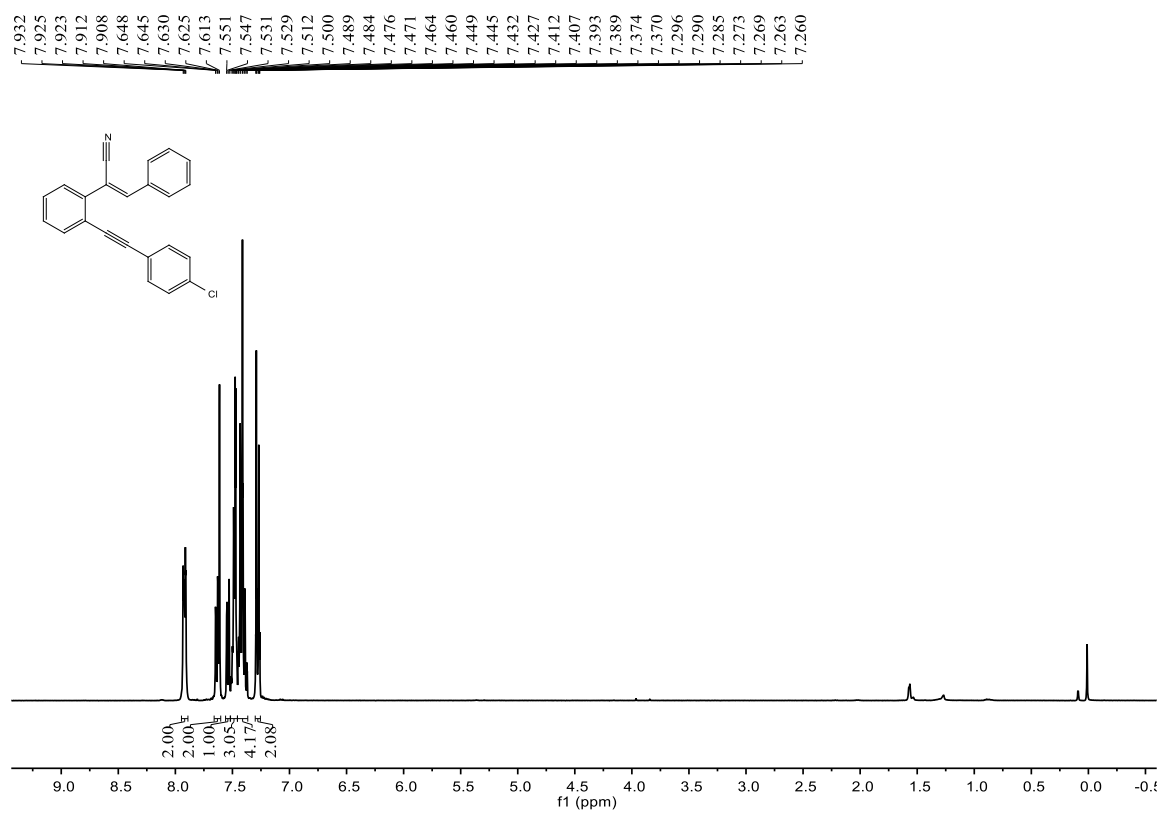

<sup>13</sup>C NMR spectra of compound **1x**.

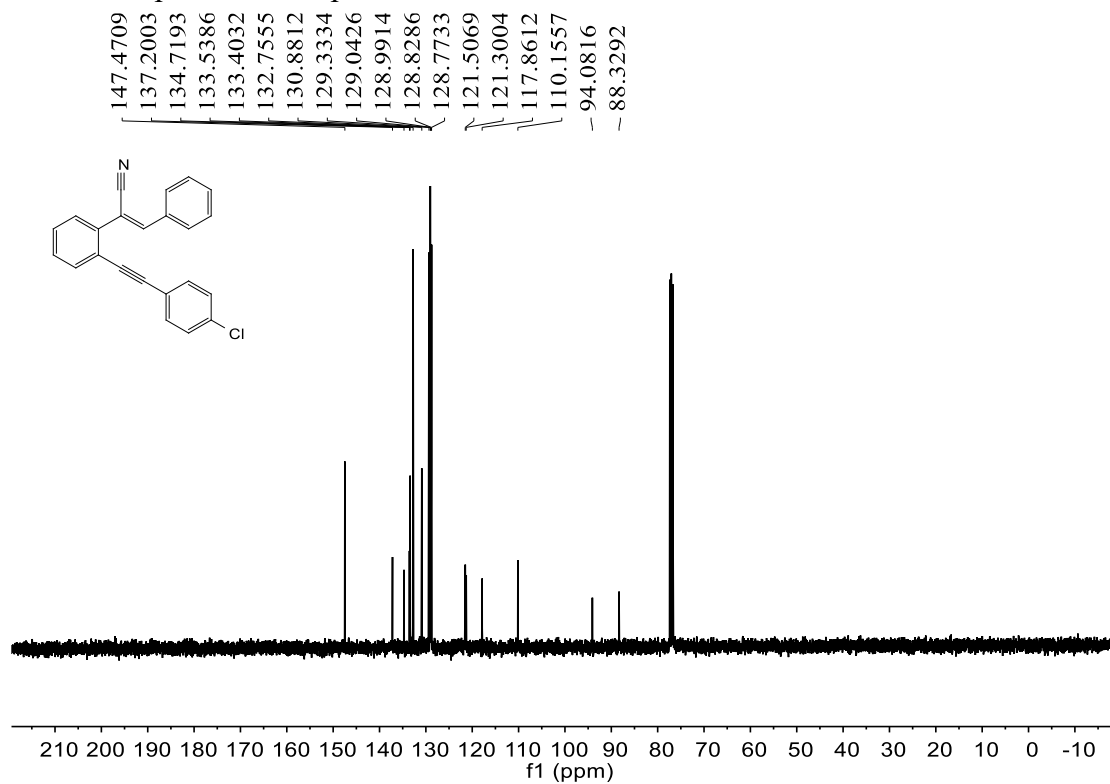

<sup>1</sup>H NMR spectra of compound **1y**.

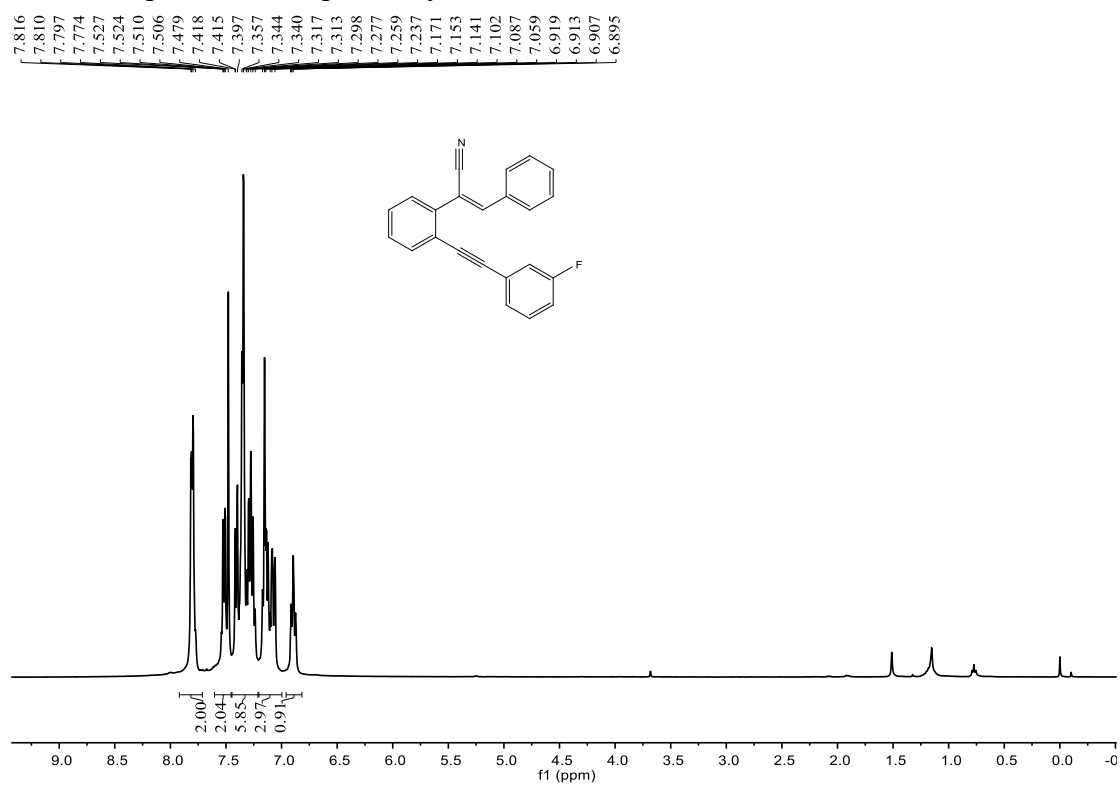

<sup>13</sup>C NMR spectra of compound **1y**.

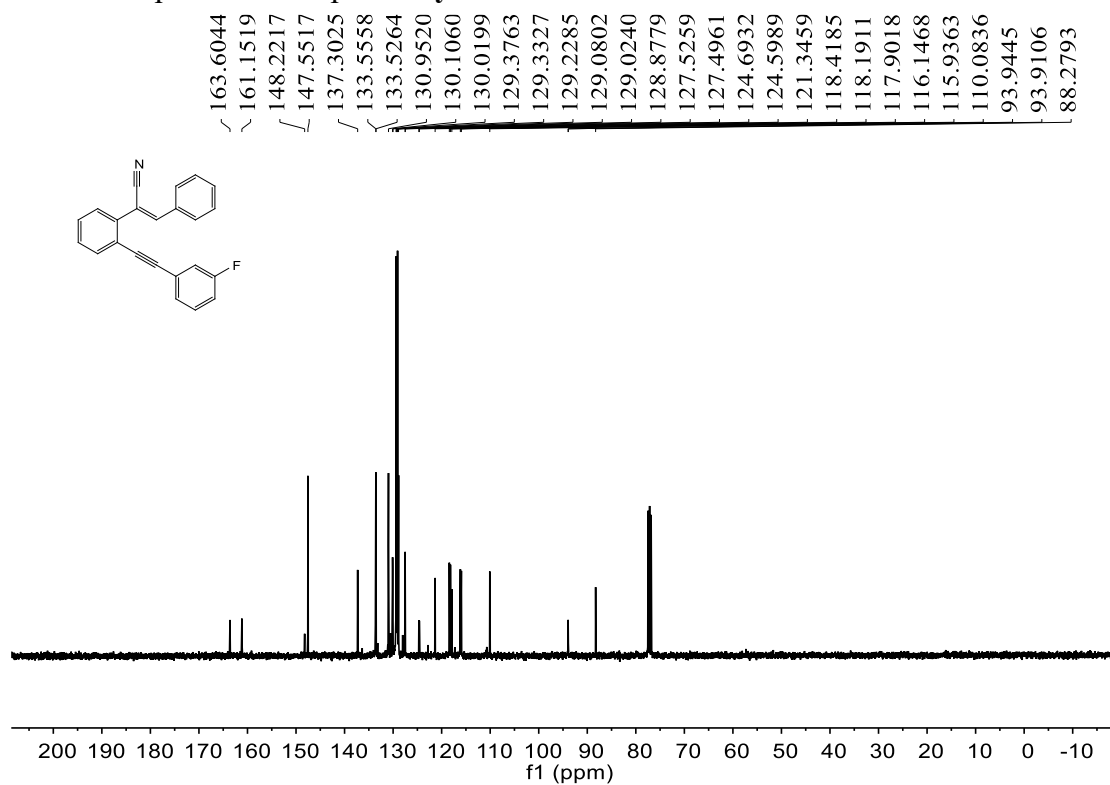

<sup>19</sup>F NMR spectra of compound **1y**.

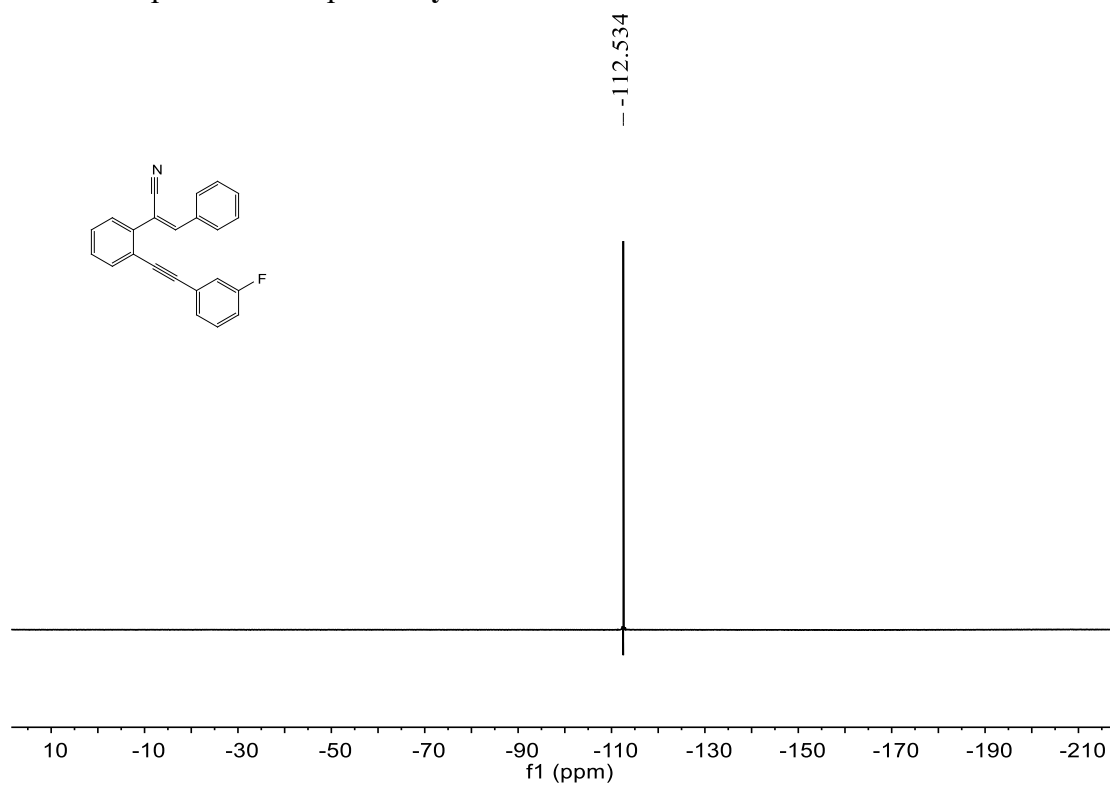

<sup>1</sup>H NMR spectra of compound **1z**.

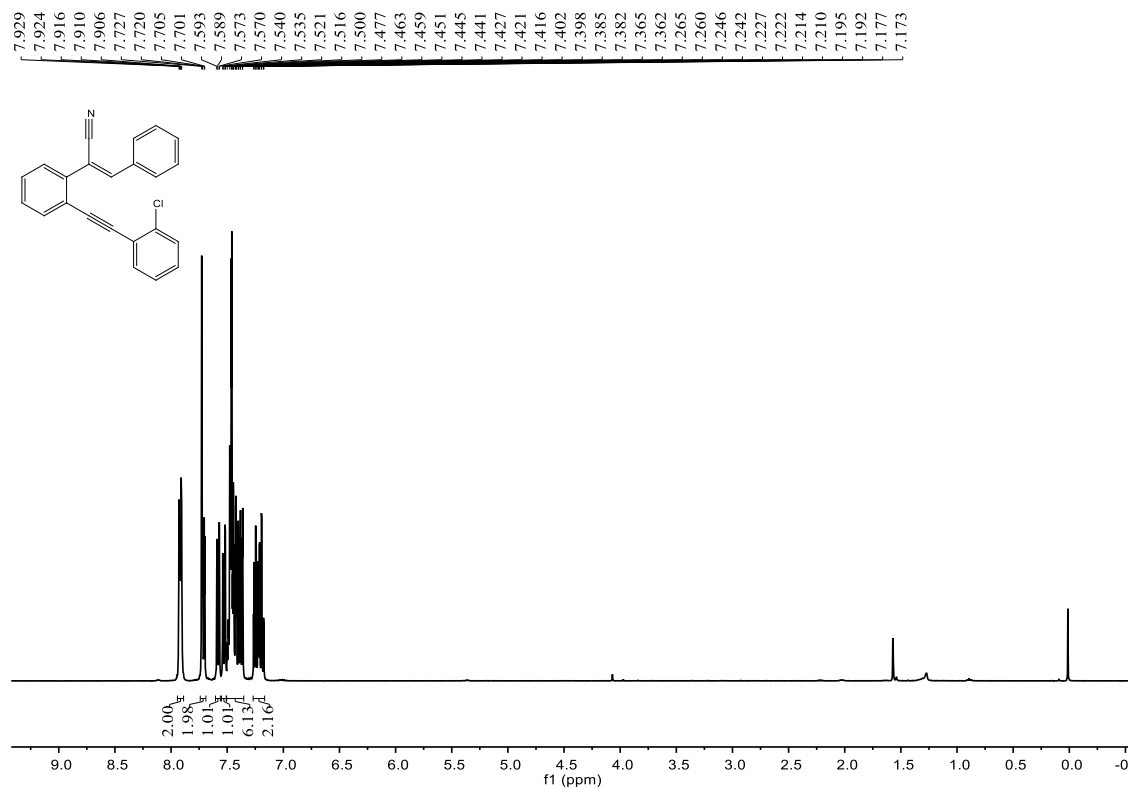

<sup>13</sup>C NMR spectra of compound **1z**.

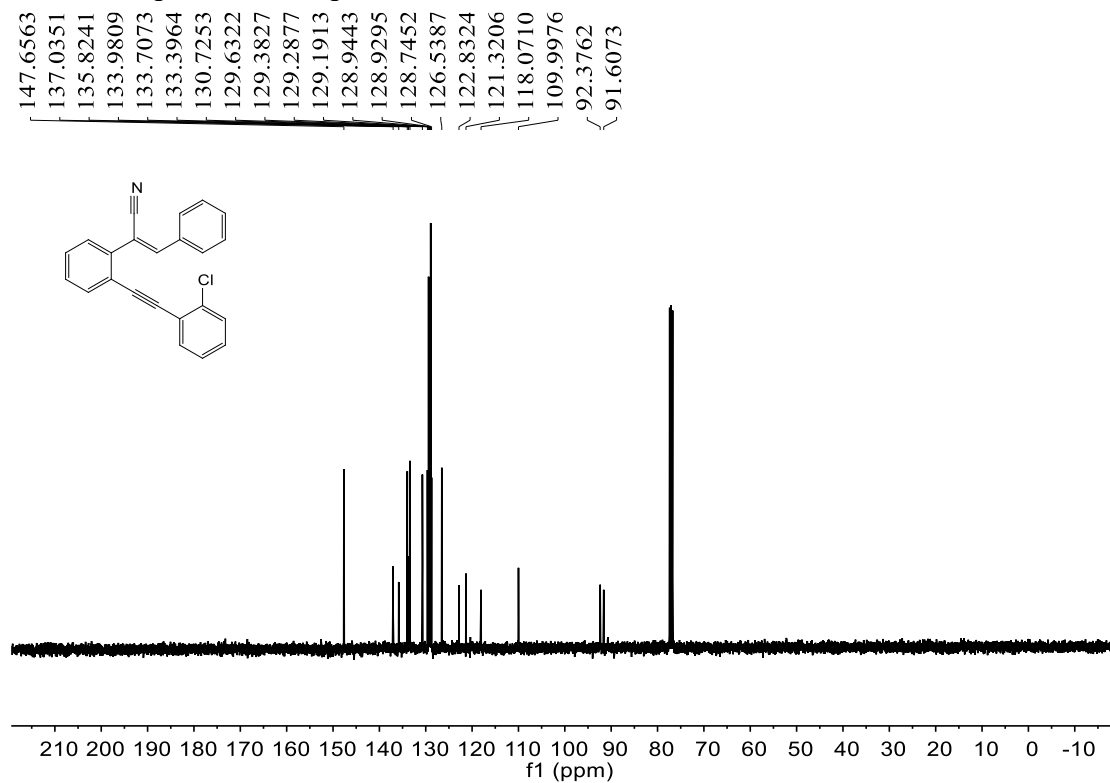

### <sup>1</sup>H NMR spectra of compound **1aa**.

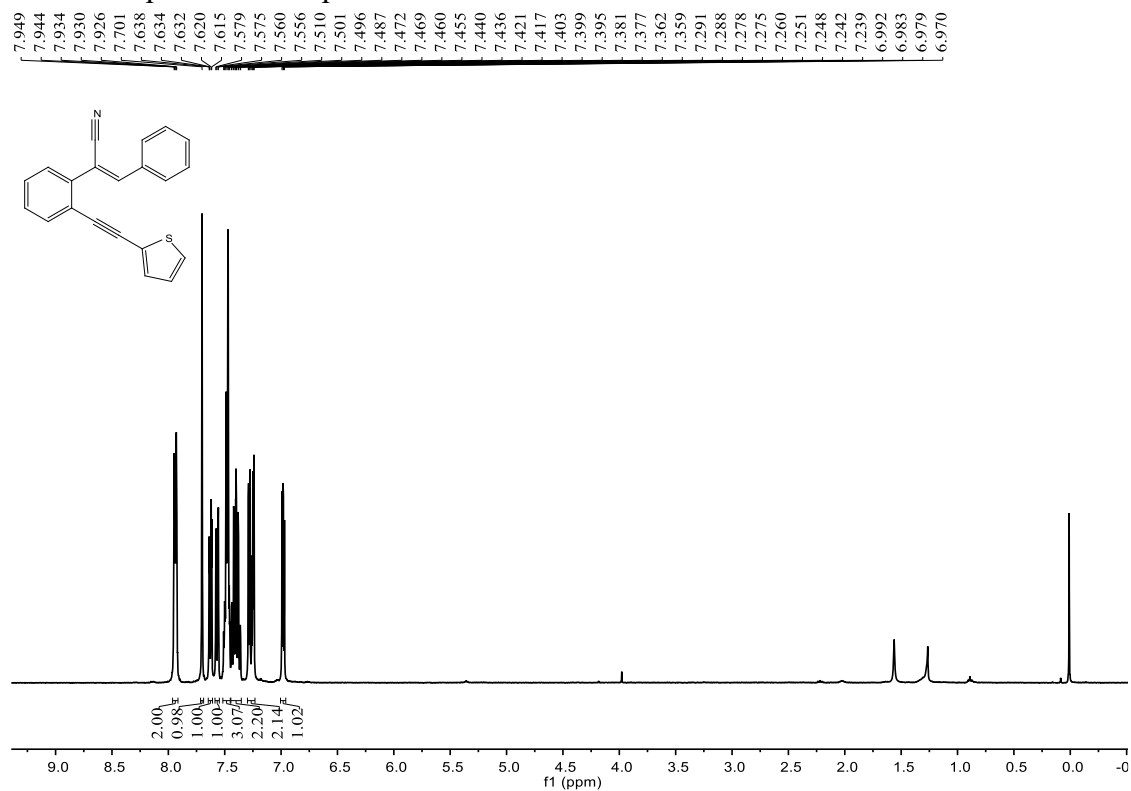

### <sup>13</sup>C NMR spectra of compound **1aa**.

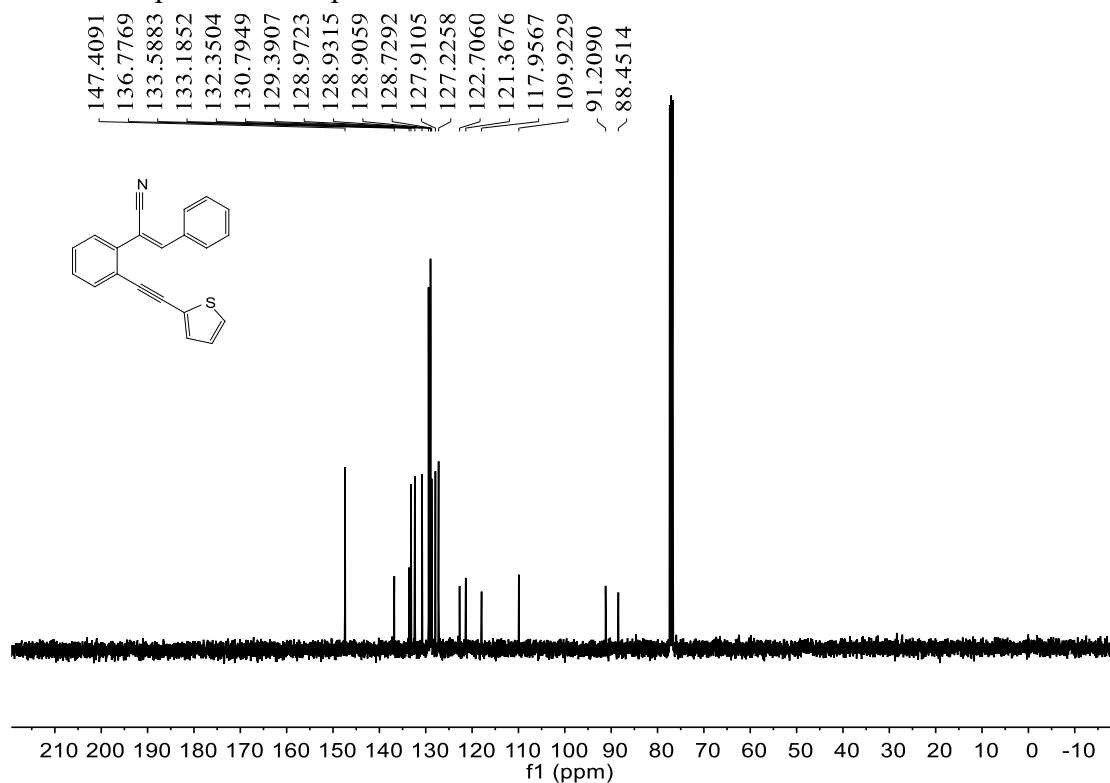

<sup>1</sup>H NMR spectra of compound **1ab**.

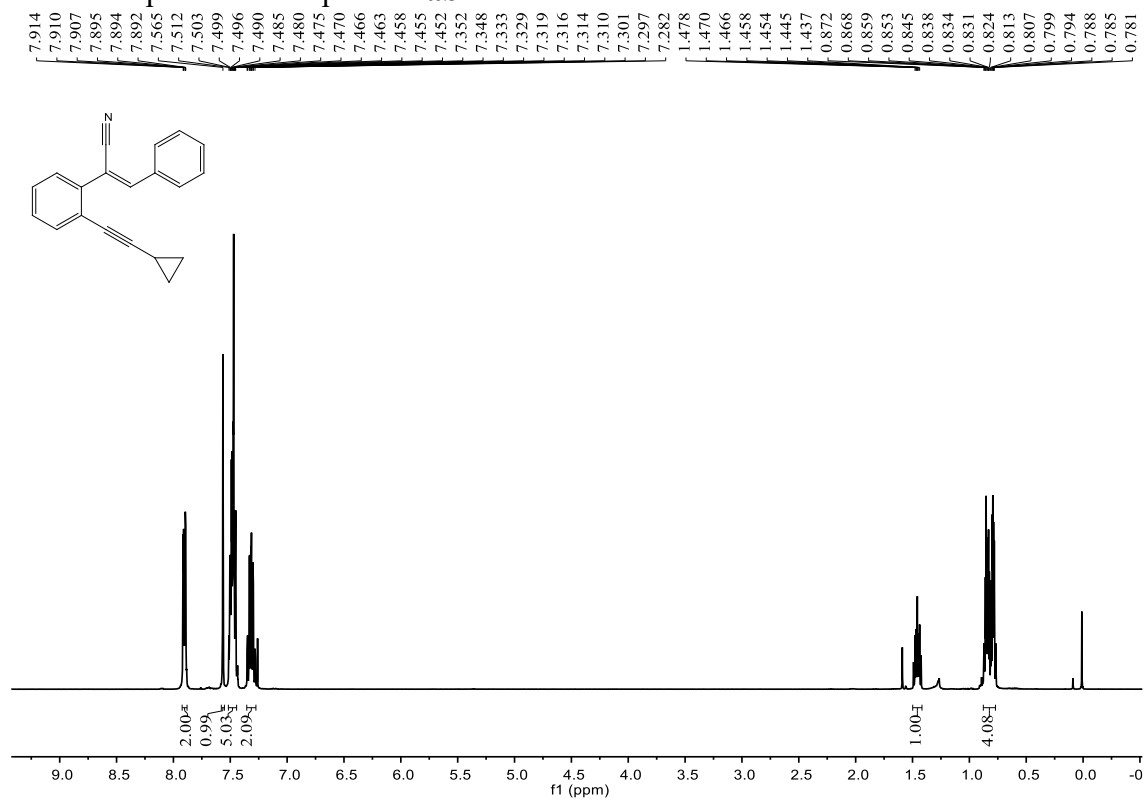

<sup>13</sup>C NMR spectra of compound **1ab**.

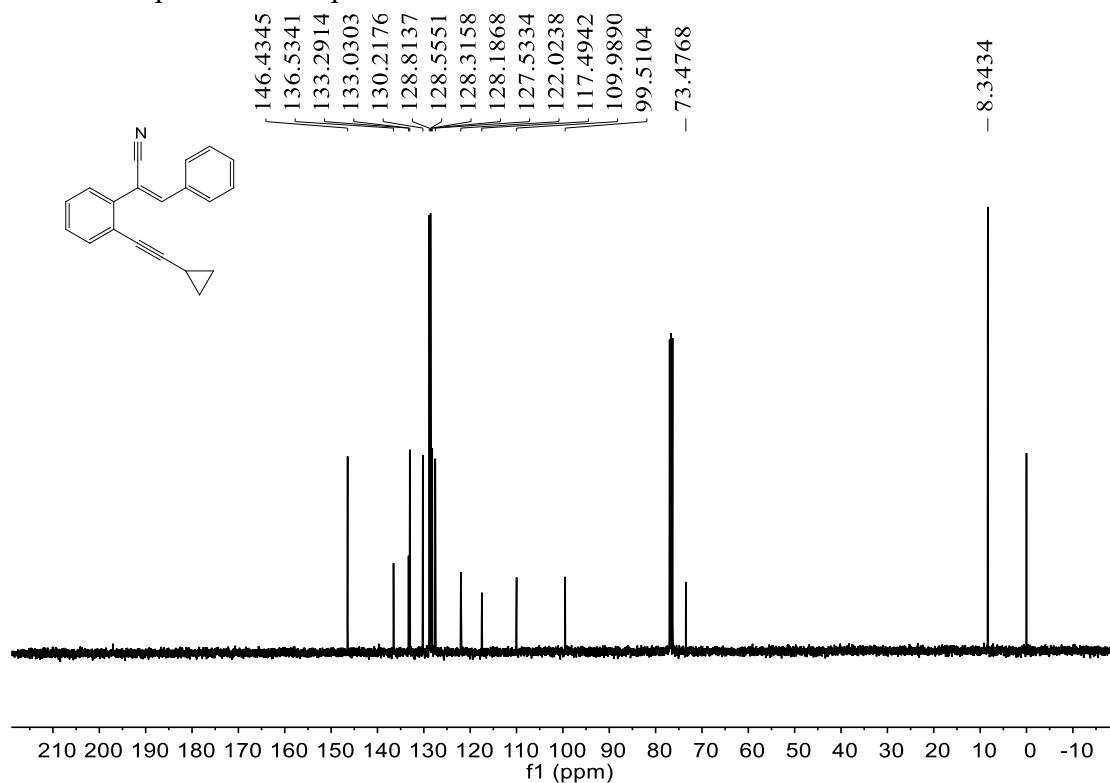

### $^1\text{H}$ NMR spectra of compound **3aa**.

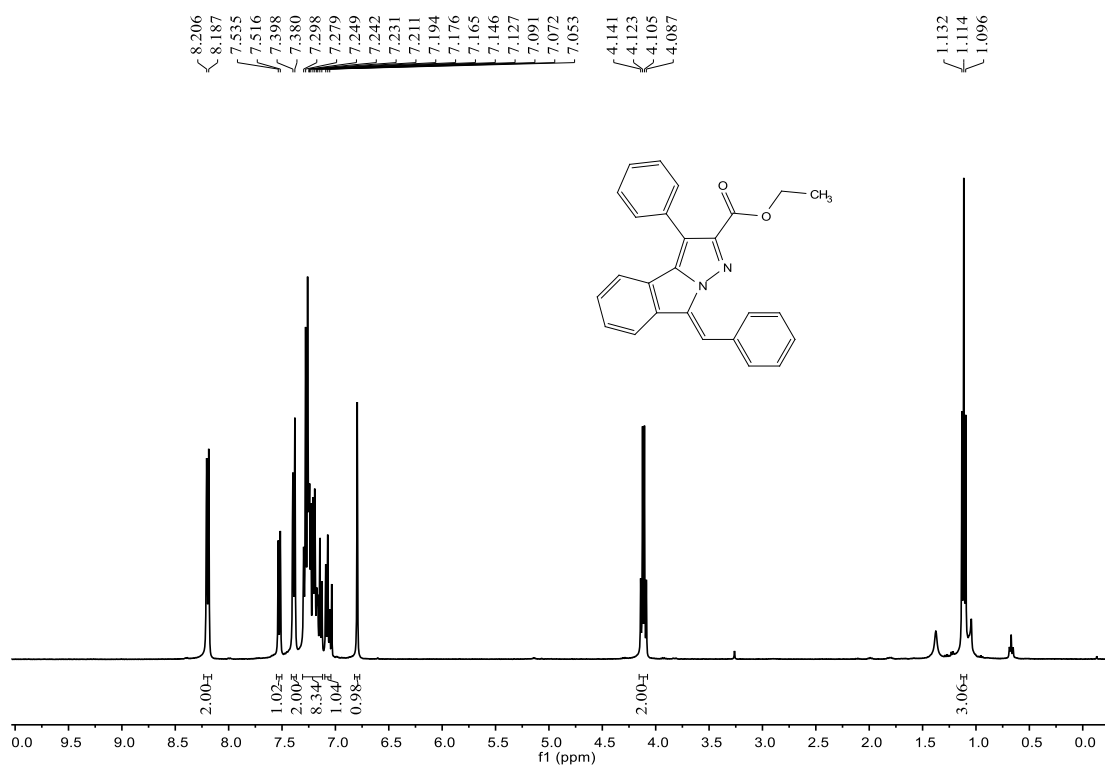

### $^{13}\text{C}$ NMR spectra of compound **3aa**.

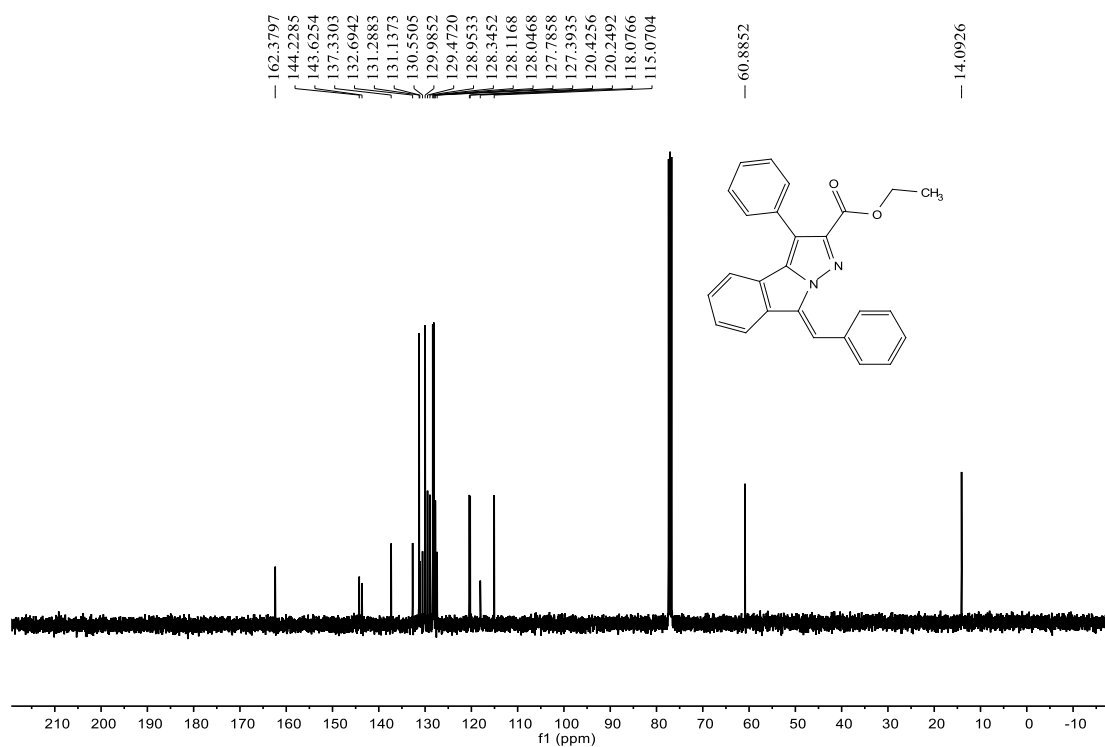

### <sup>1</sup>H NMR spectra of compound **3ab**.

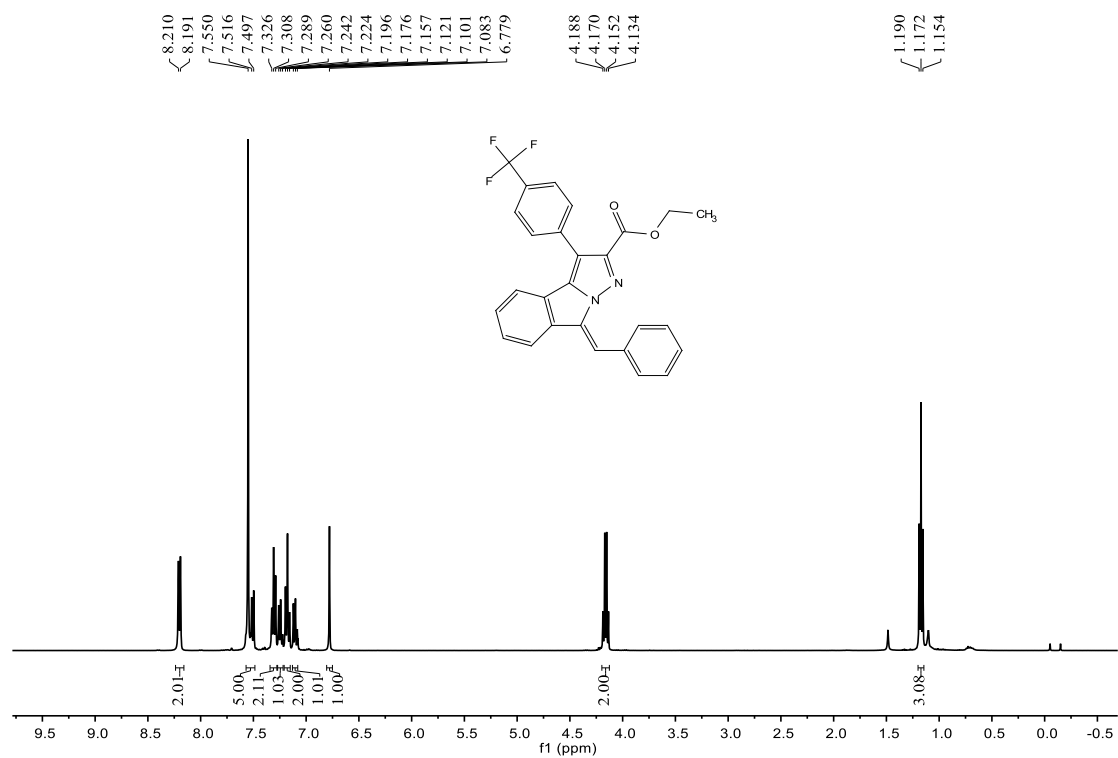

### <sup>13</sup>C NMR spectra of compound **3ab**.

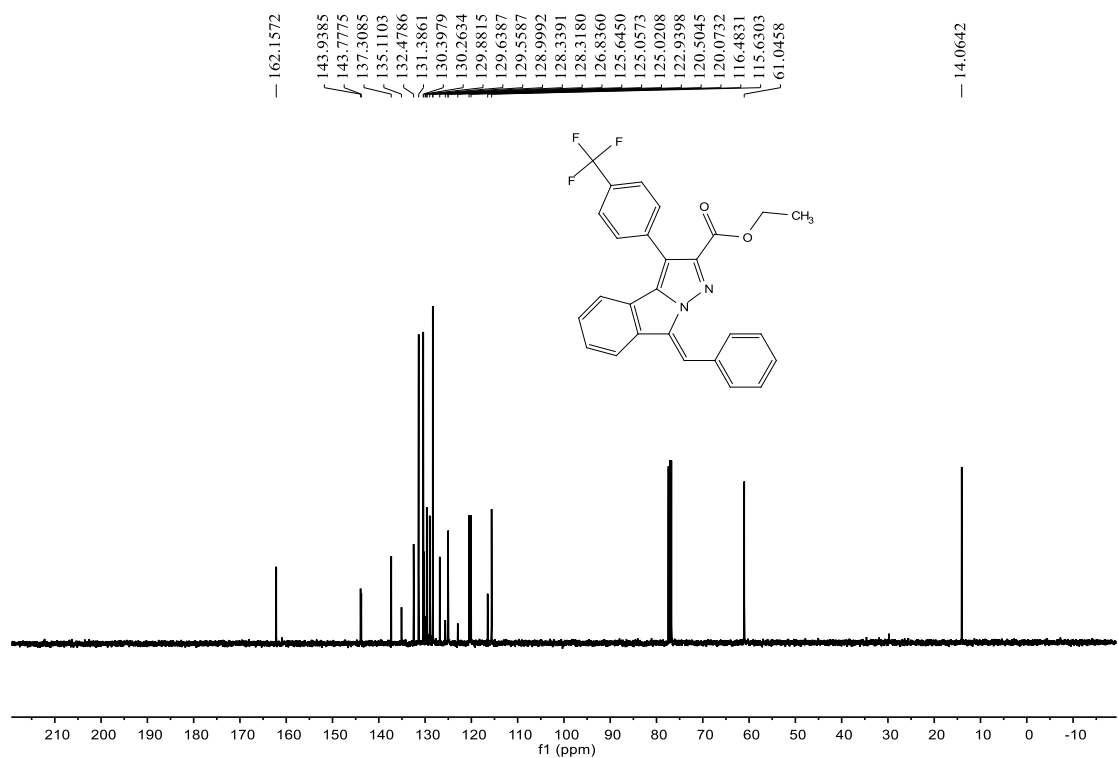

<sup>19</sup>F NMR spectra of compound **3ab**.

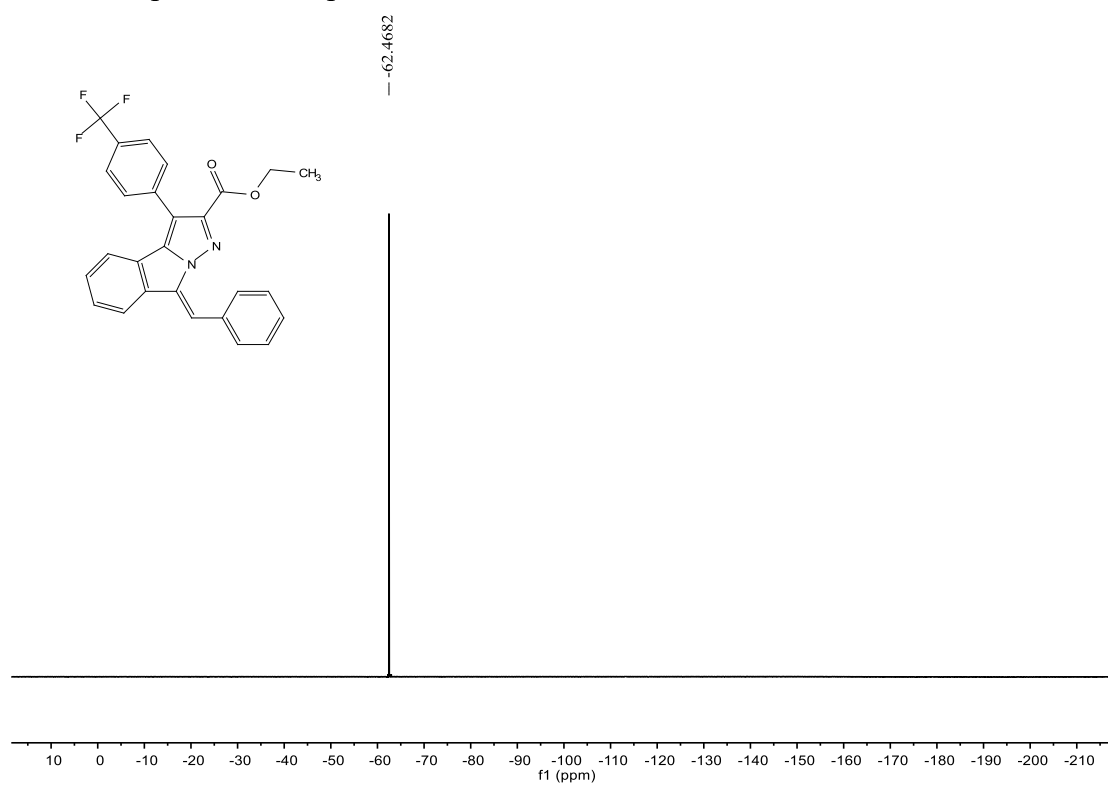

<sup>1</sup>H NMR spectra of compound **3ac**.

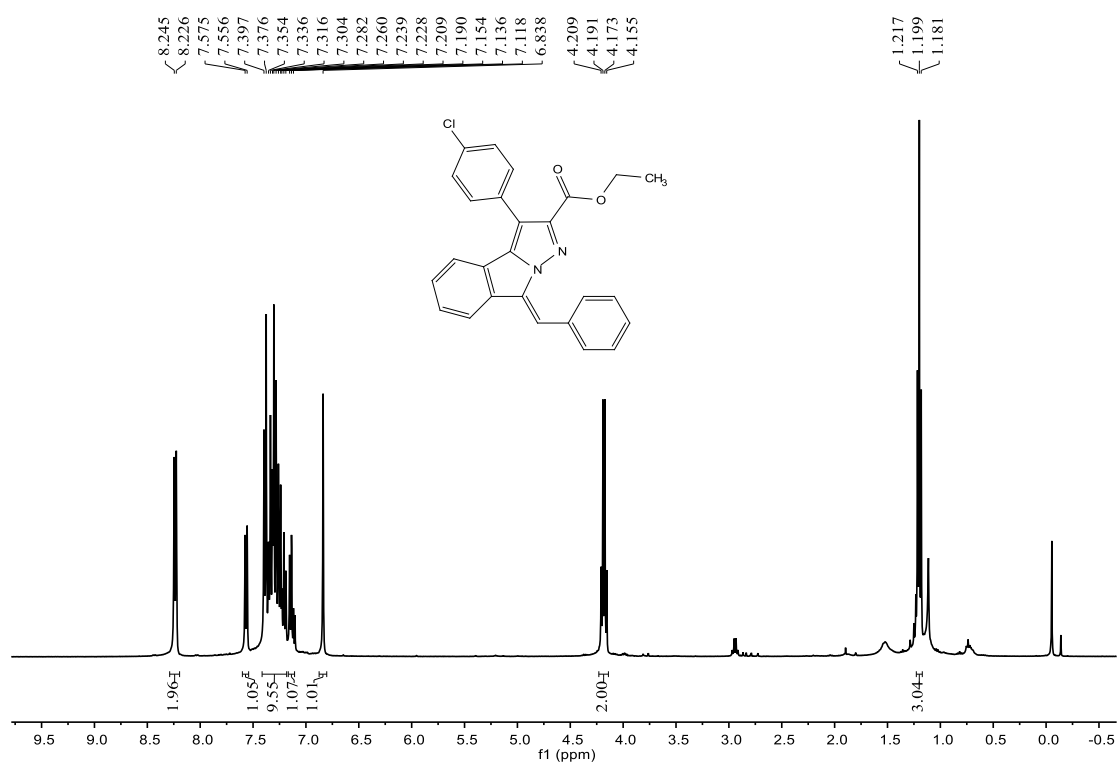

<sup>13</sup>C NMR spectra of compound **3ac**.

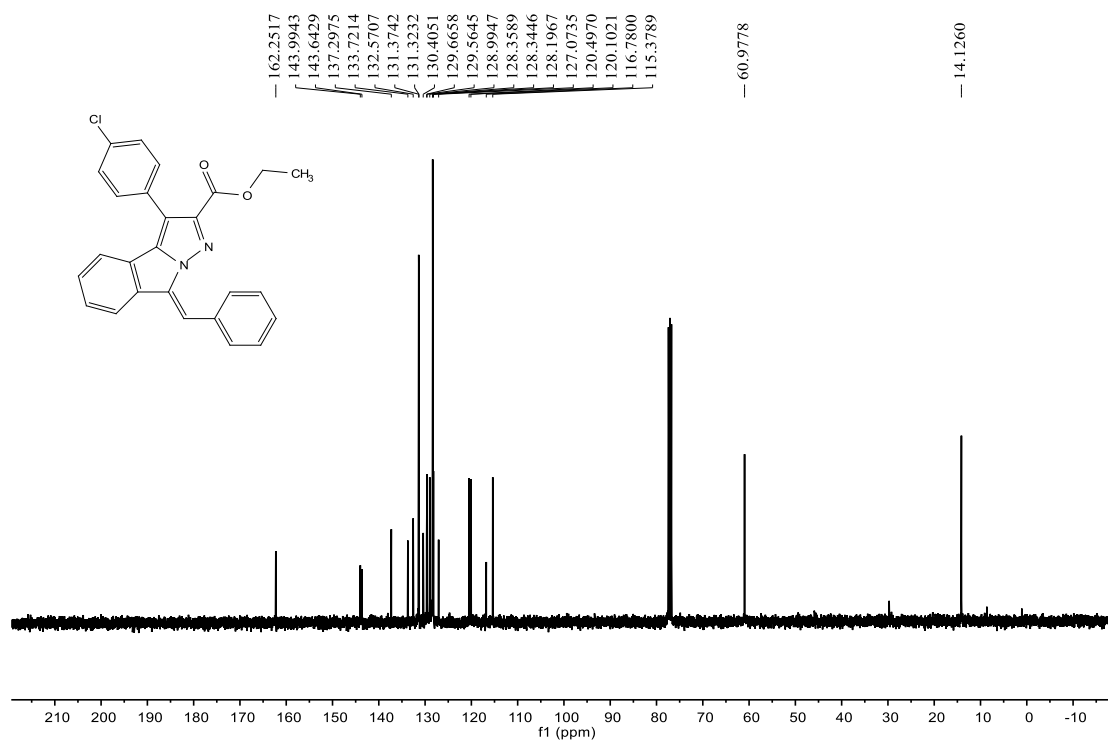

<sup>1</sup>H NMR spectra of compound **3ad**.

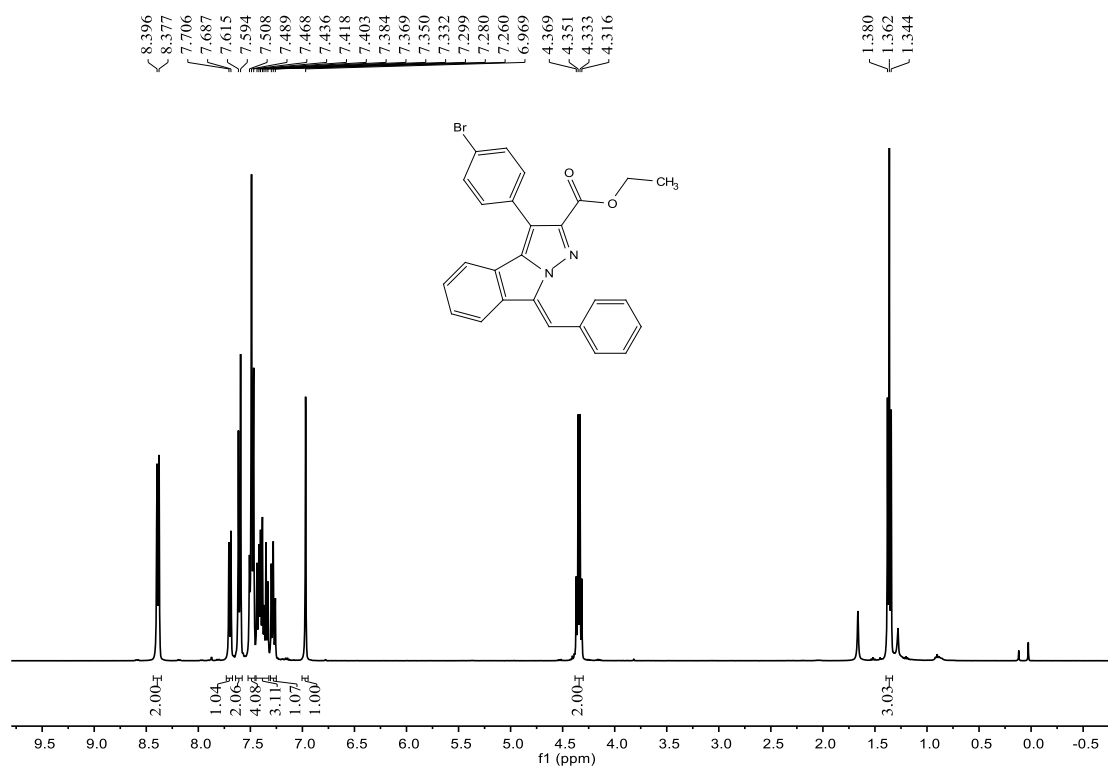

$^{13}\text{C}$  NMR spectra of compound **3ad**.

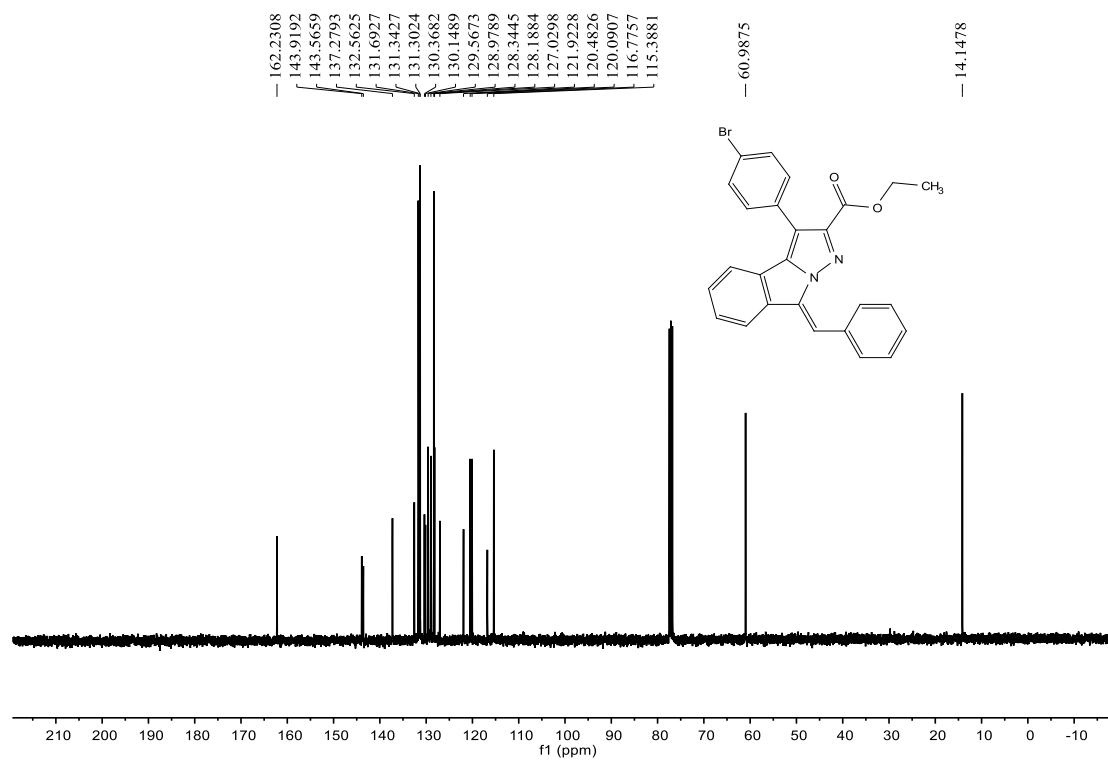

$^1\text{H}$  NMR spectra of compound **3ae**.

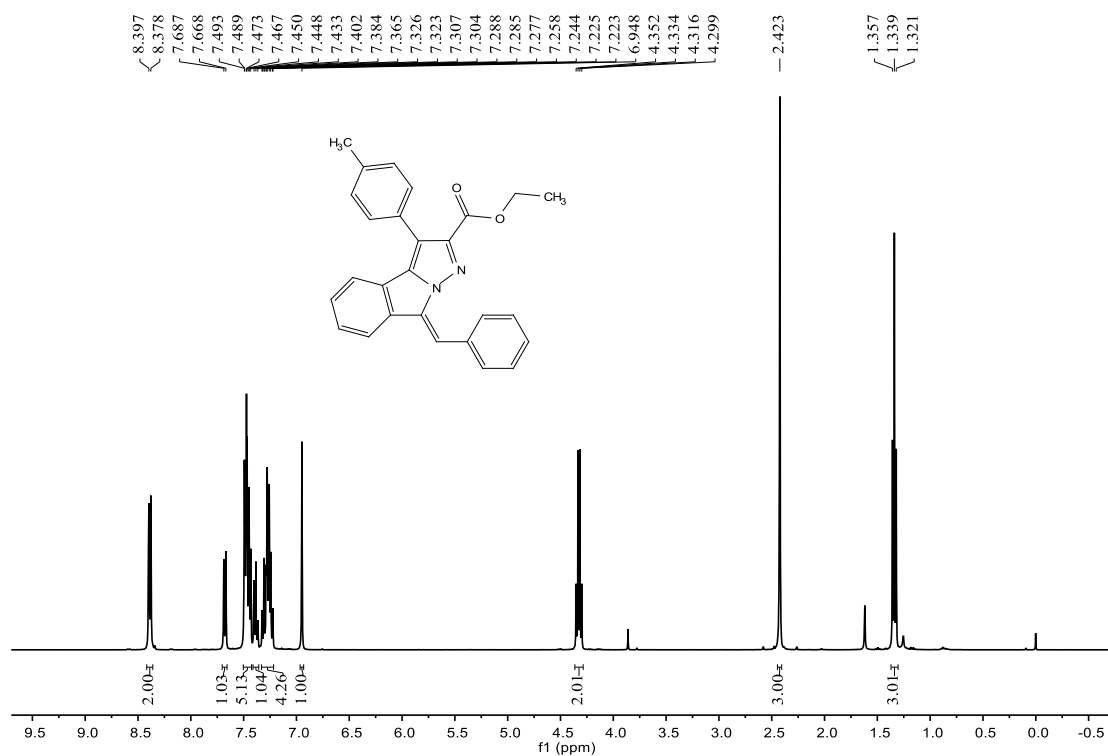

<sup>13</sup>C NMR spectra of compound **3ae**.

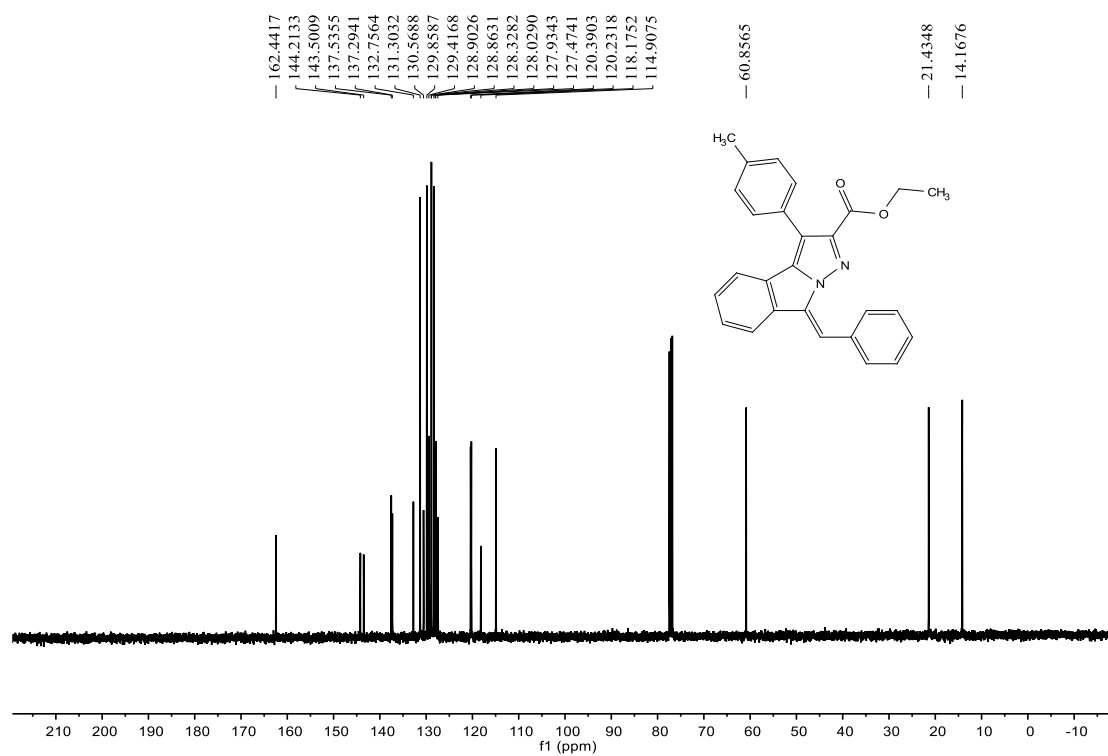

<sup>1</sup>H NMR spectra of compound **3af**.

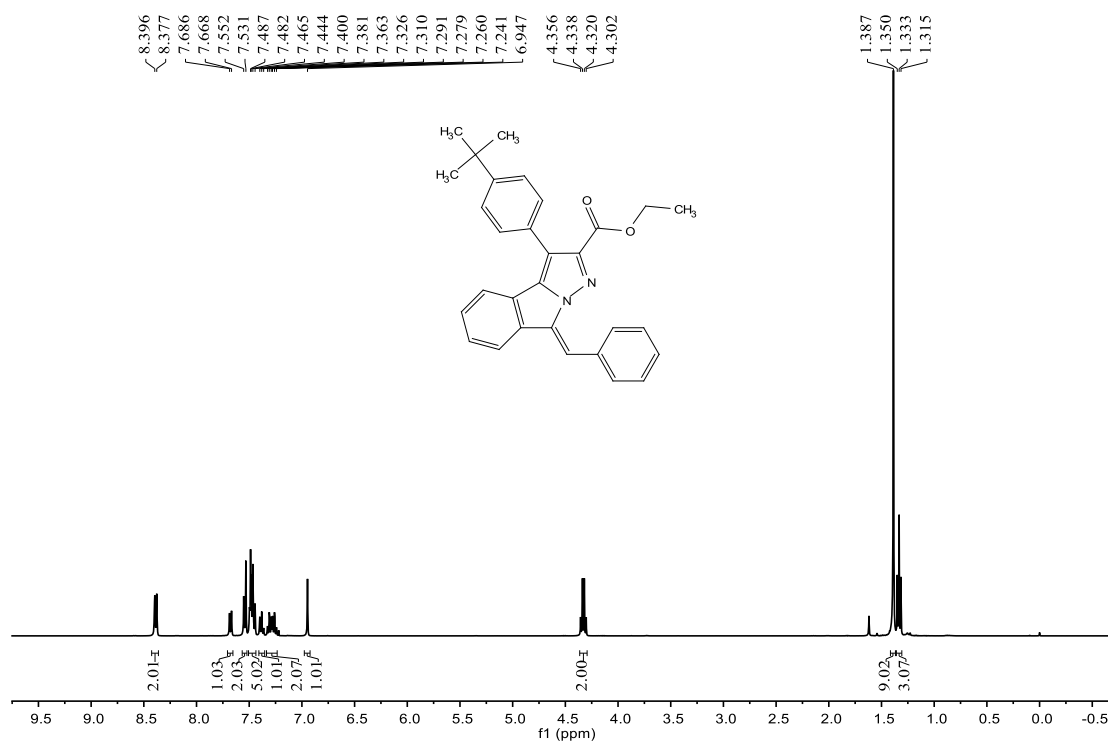

<sup>1</sup>H NMR spectra of compound **3af**.

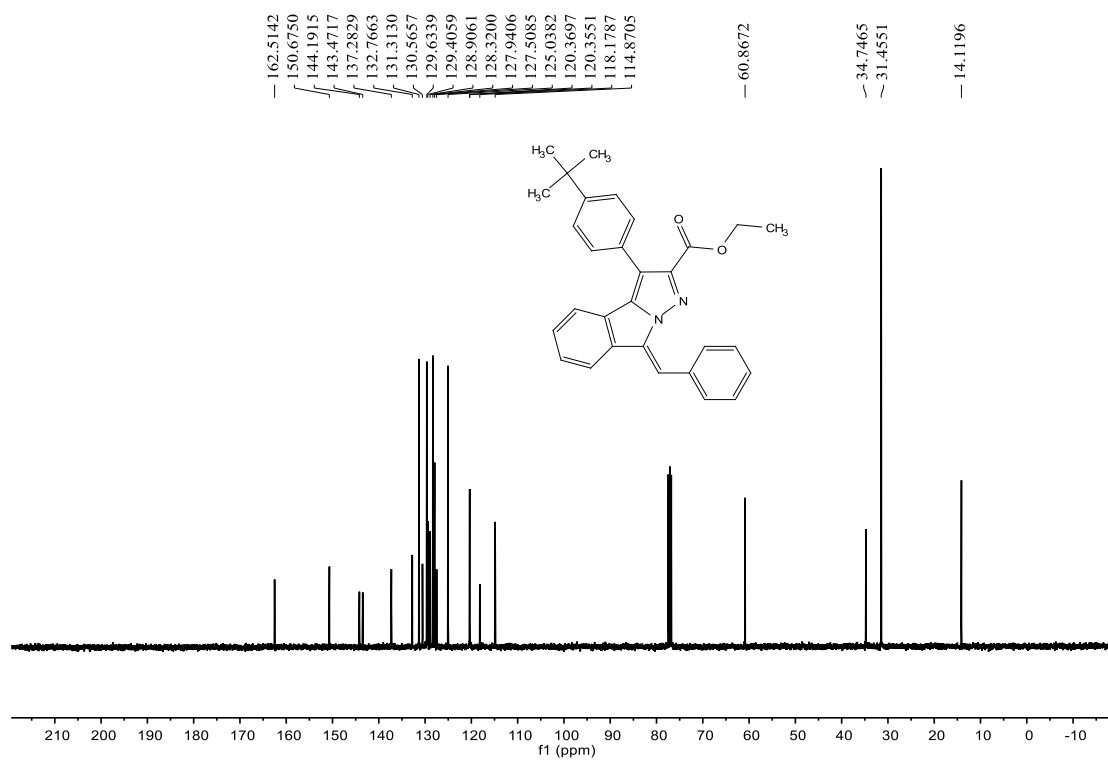

<sup>1</sup>H NMR spectra of compound **3ag**.

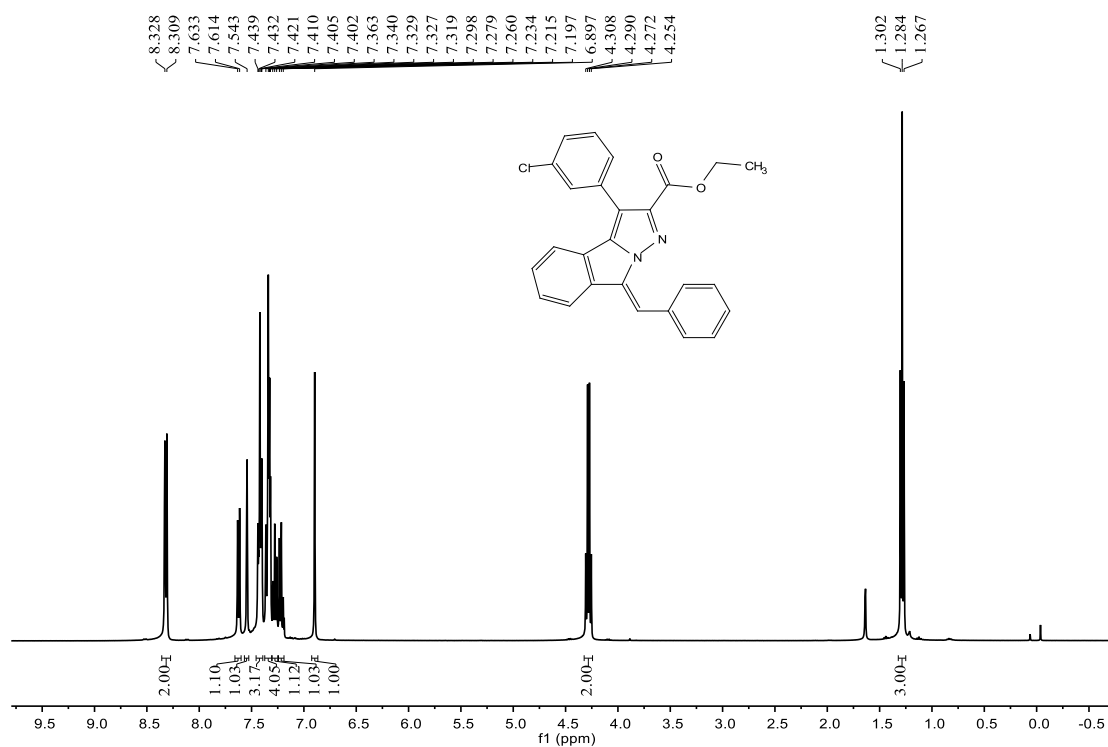

<sup>13</sup>C NMR spectra of compound **3ag**.

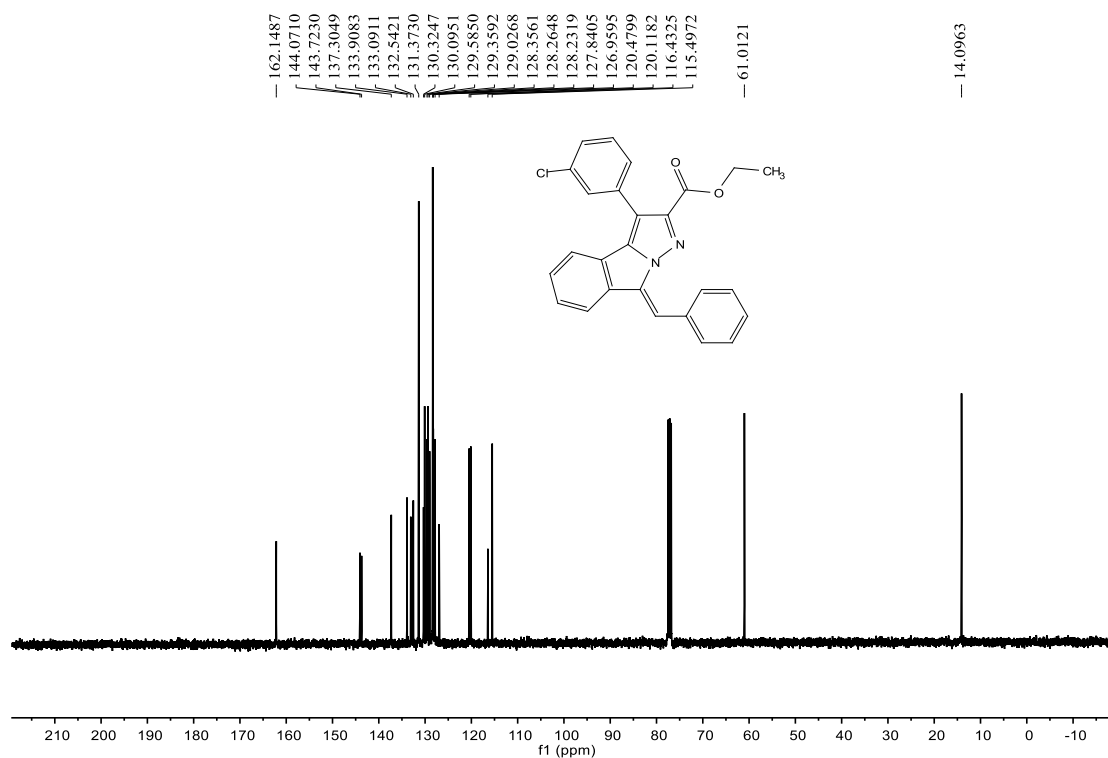

<sup>1</sup>H NMR spectra of compound **3ah**.

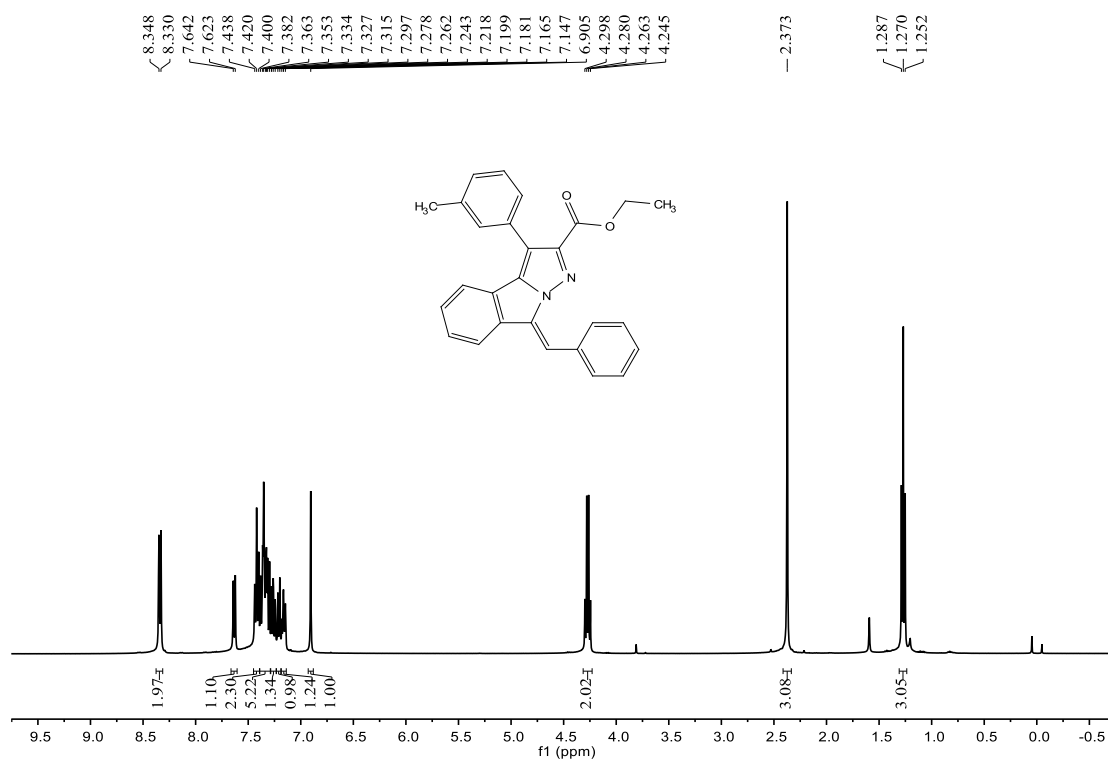

<sup>13</sup>C NMR spectra of compound **3ah**.

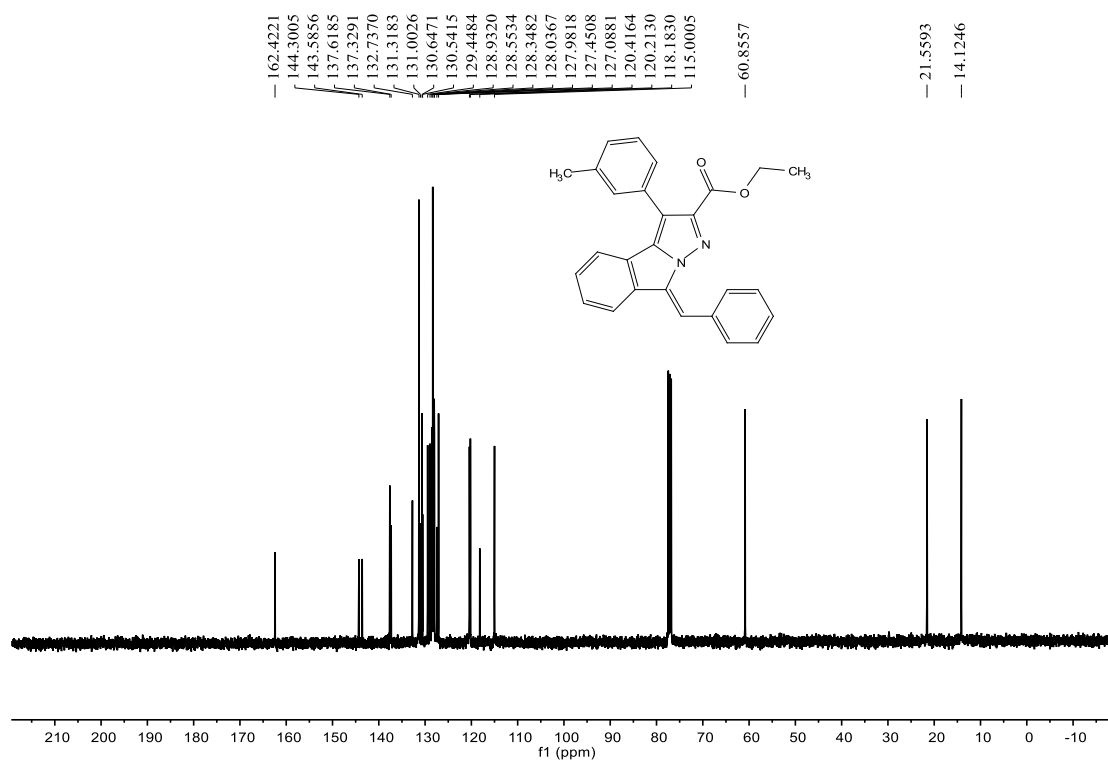

<sup>1</sup>H NMR spectra of compound **3ai**.

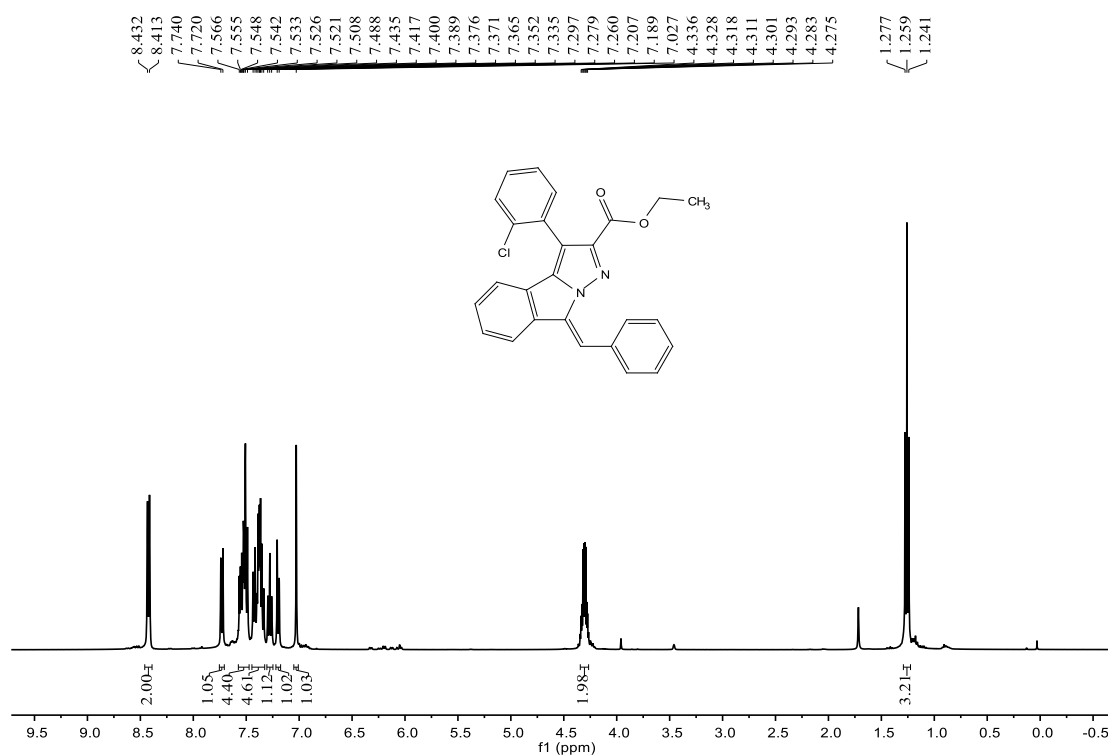

<sup>13</sup>C NMR spectra of compound **3ai**.

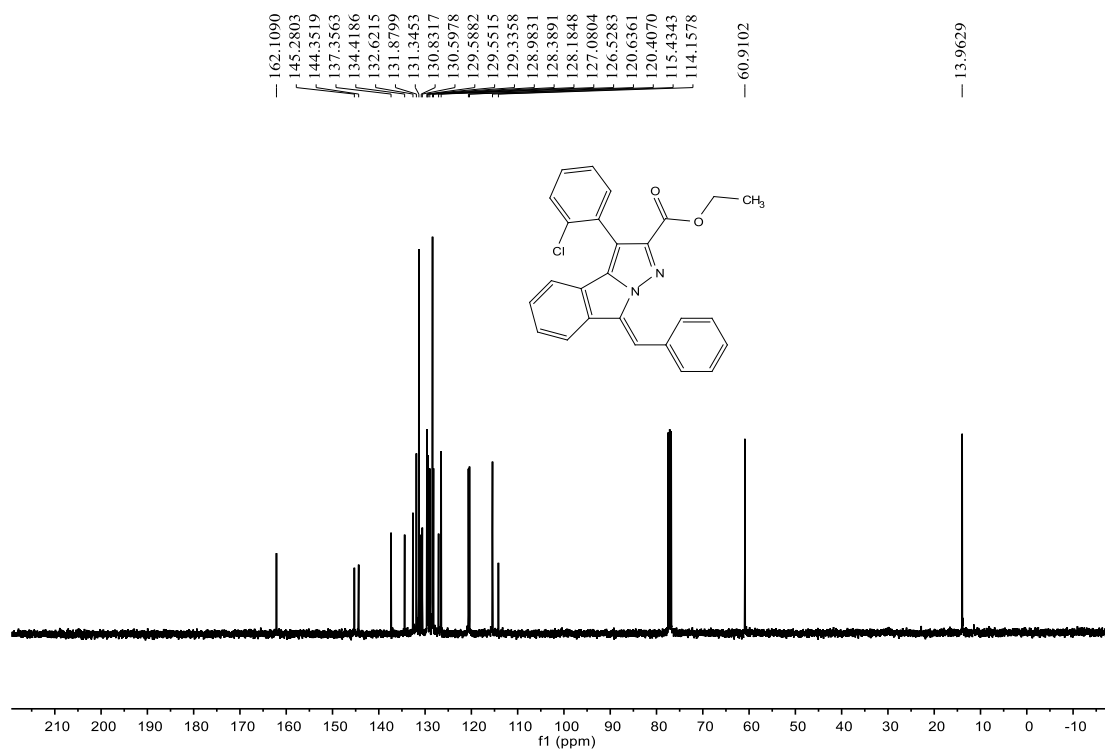

<sup>1</sup>H NMR spectra of compound **3aj**.

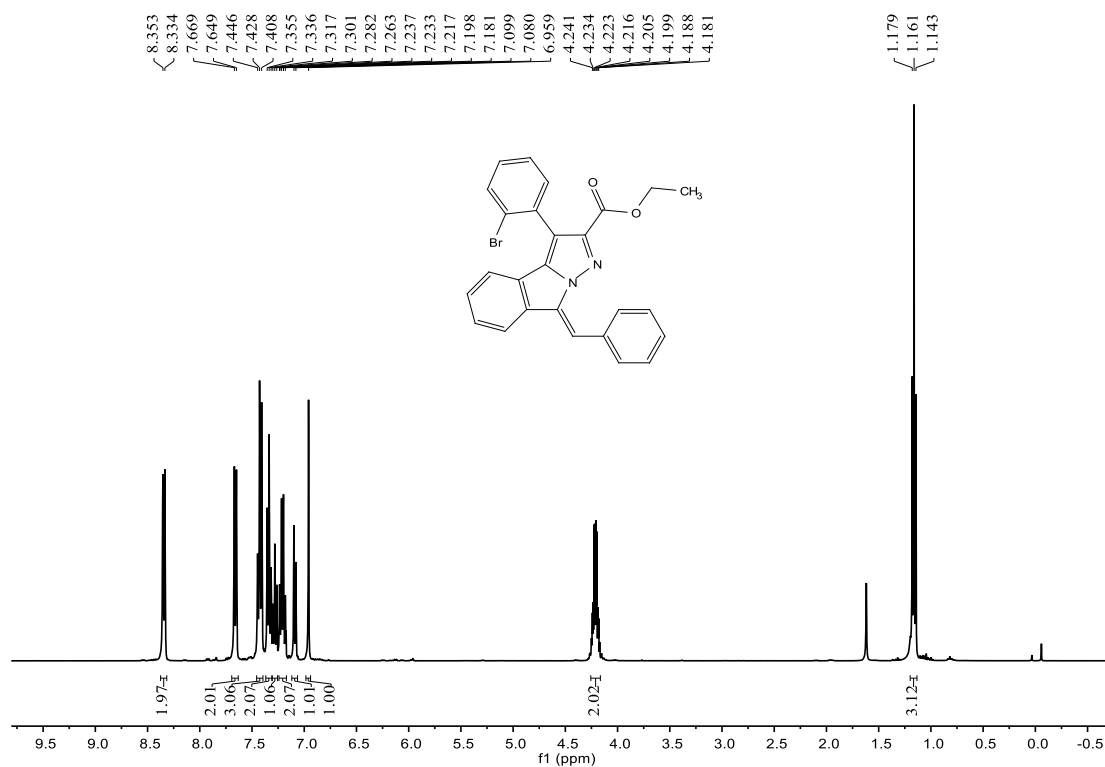

<sup>13</sup>C NMR spectra of compound **3aj**.

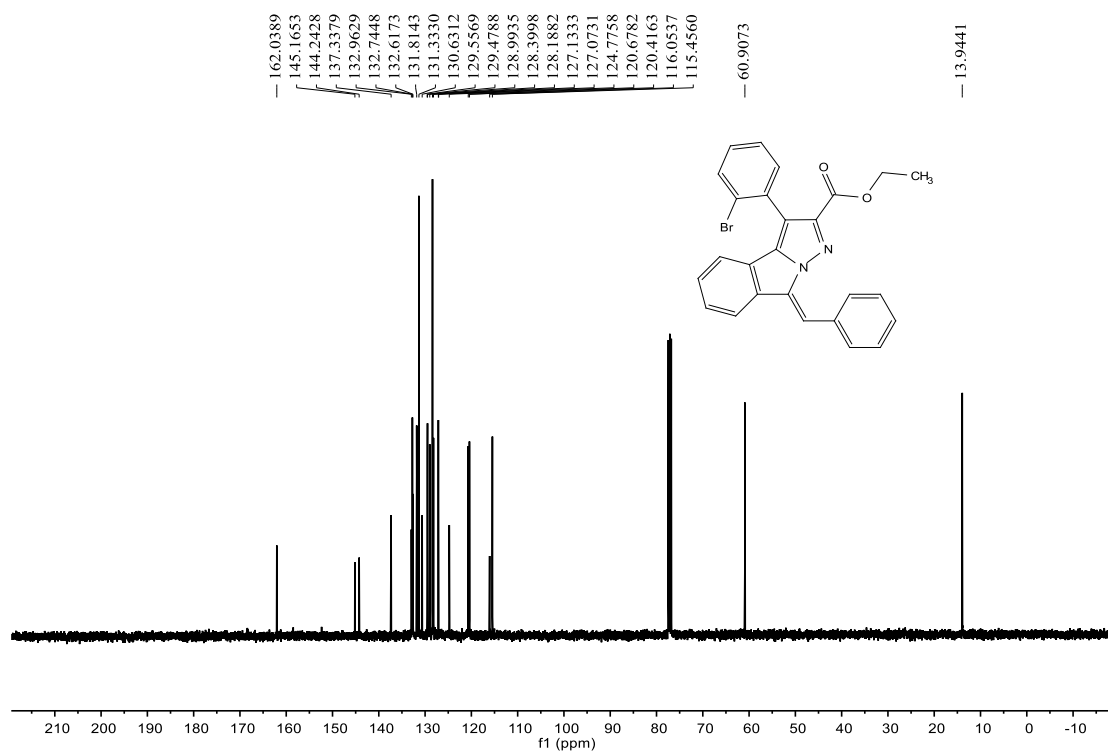

<sup>1</sup>H NMR spectra of compound **3ak**.

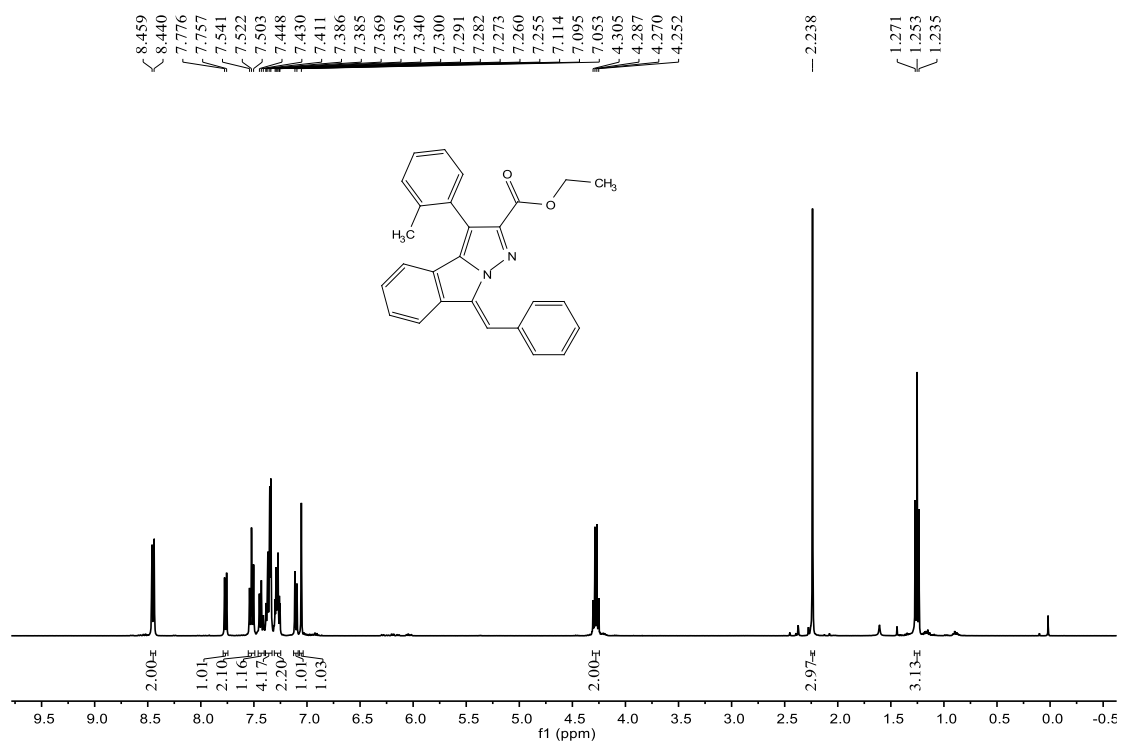

<sup>13</sup>C NMR spectra of compound **3ak**.

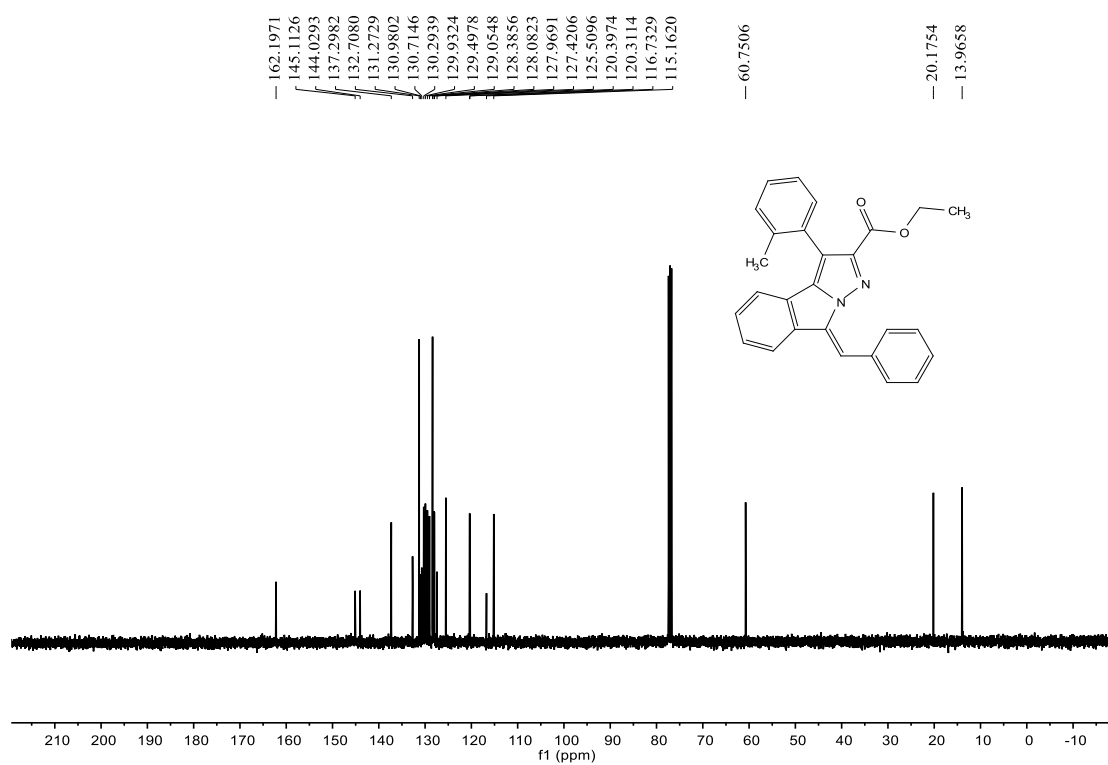

<sup>1</sup>H NMR spectra of compound **3al**.

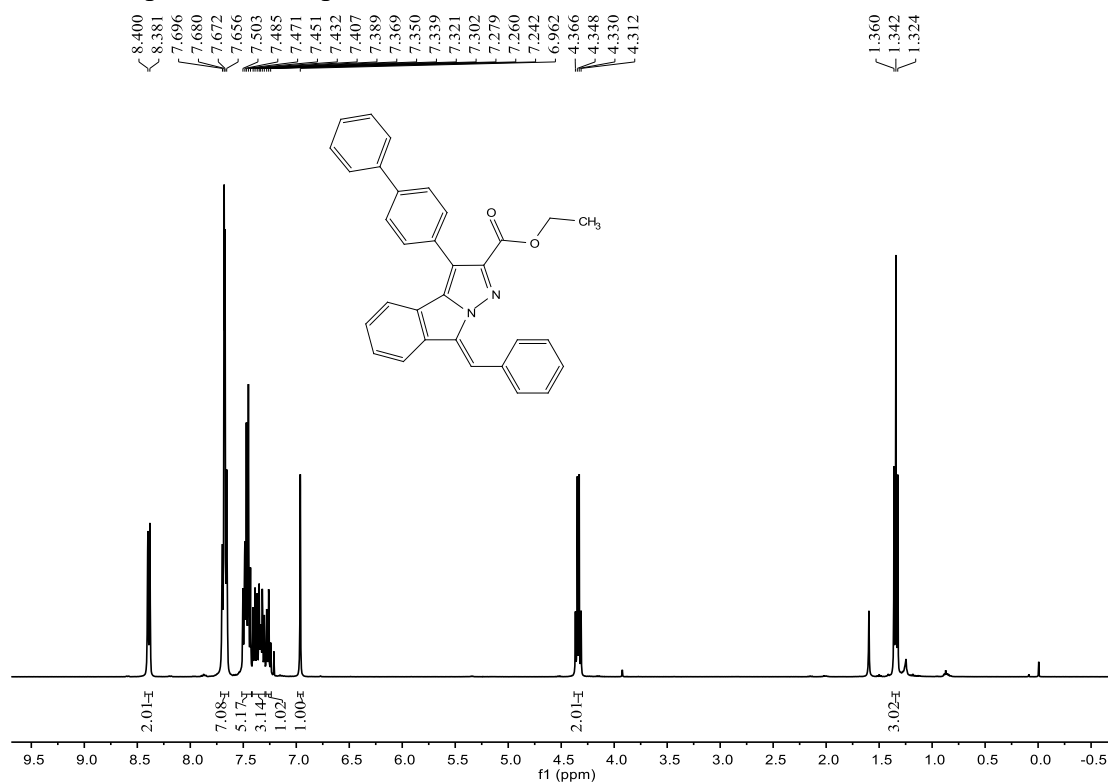

<sup>13</sup>C NMR spectra of compound **3al**.

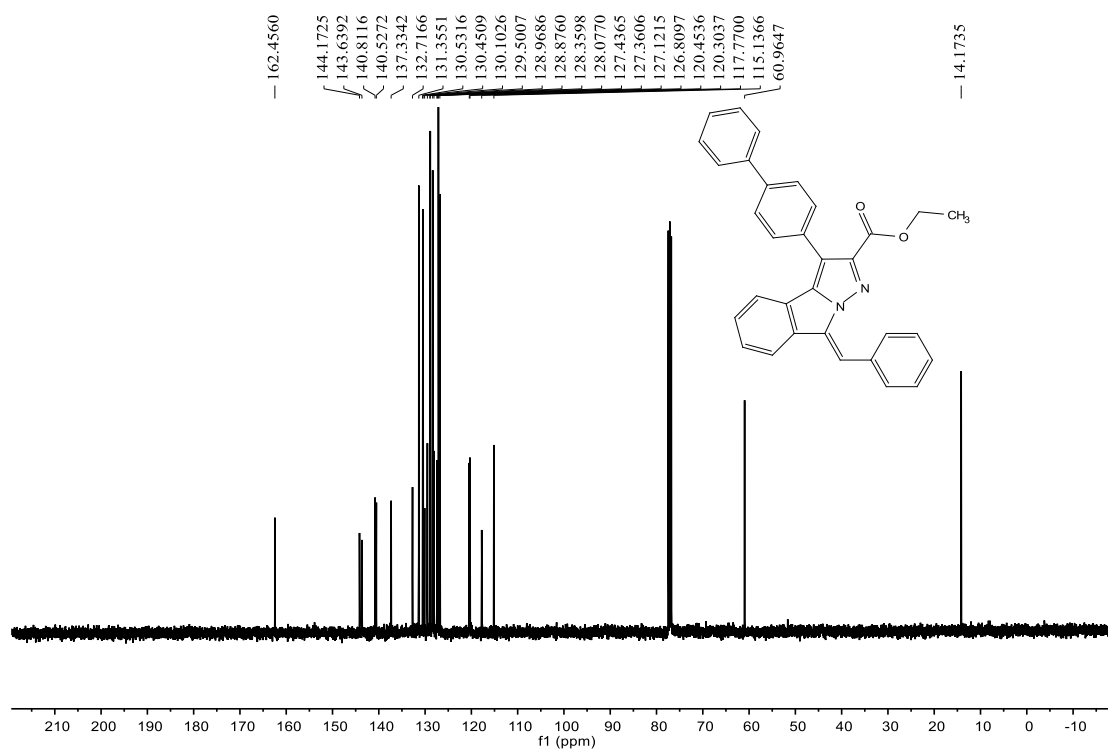

<sup>1</sup>H NMR spectra of compound **3am**.

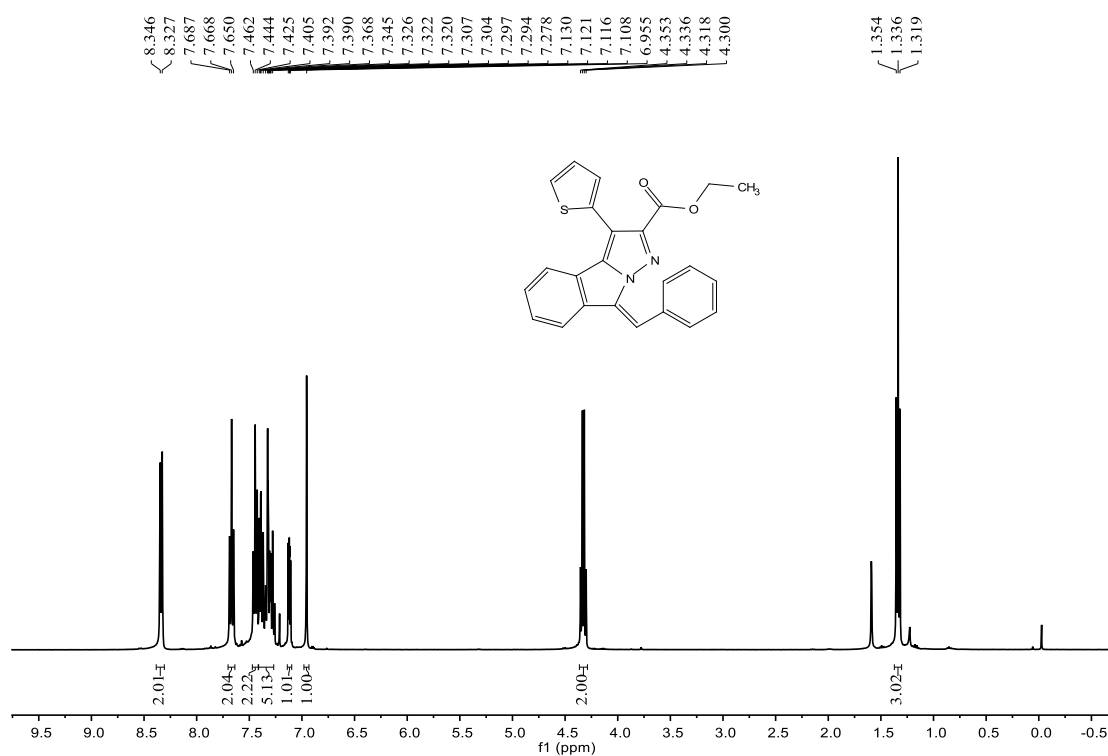

<sup>13</sup>C NMR spectra of compound **3am**.

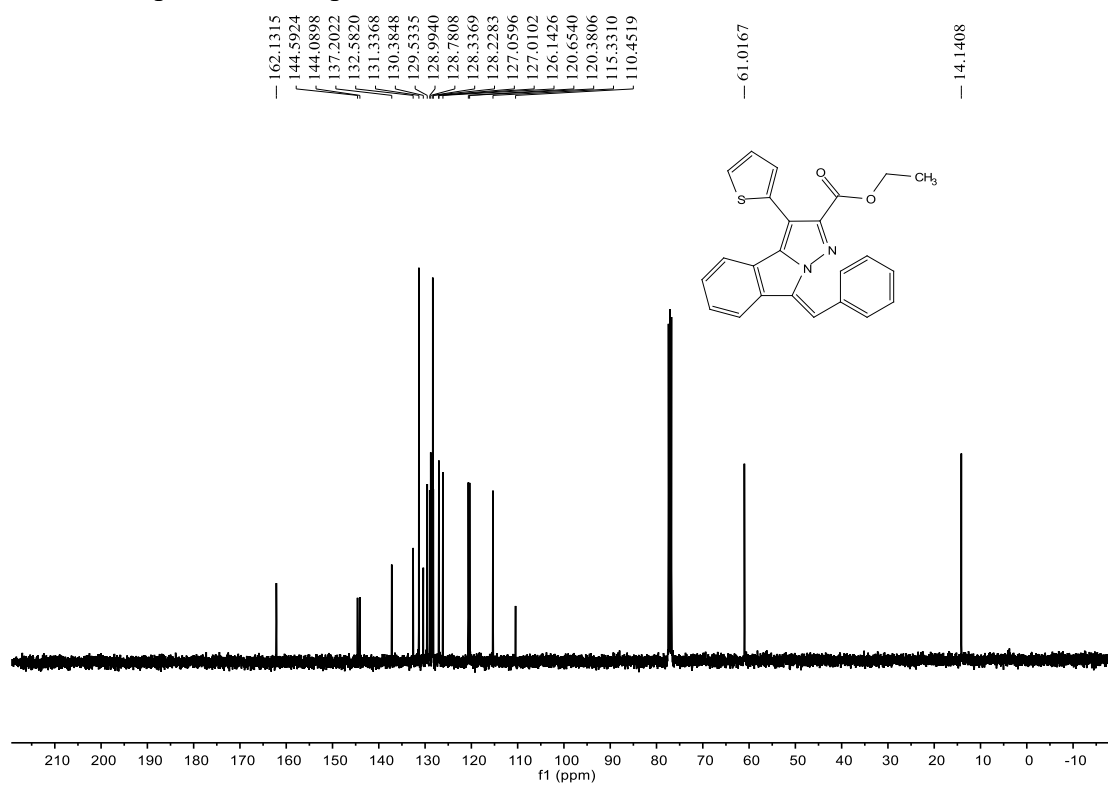

<sup>1</sup>H NMR spectra of compound **3am**.

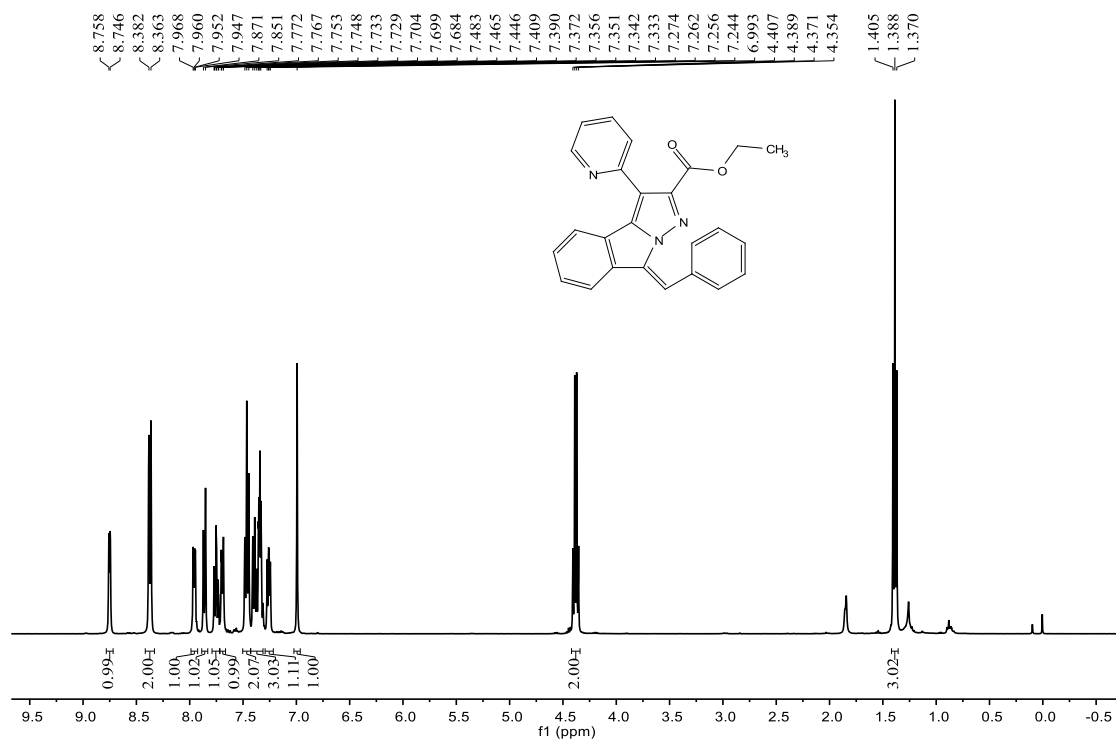

$^{13}\text{C}$  NMR spectra of compound **3an**.

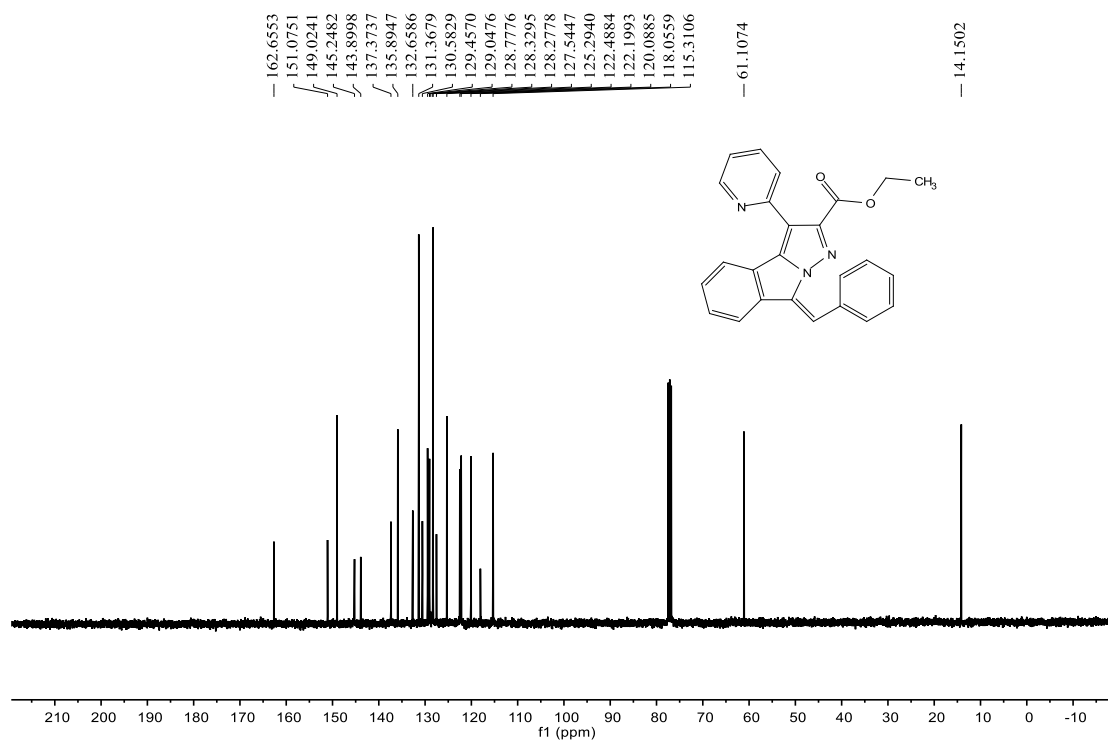

$^1\text{H}$  NMR spectra of compound **3ao**.

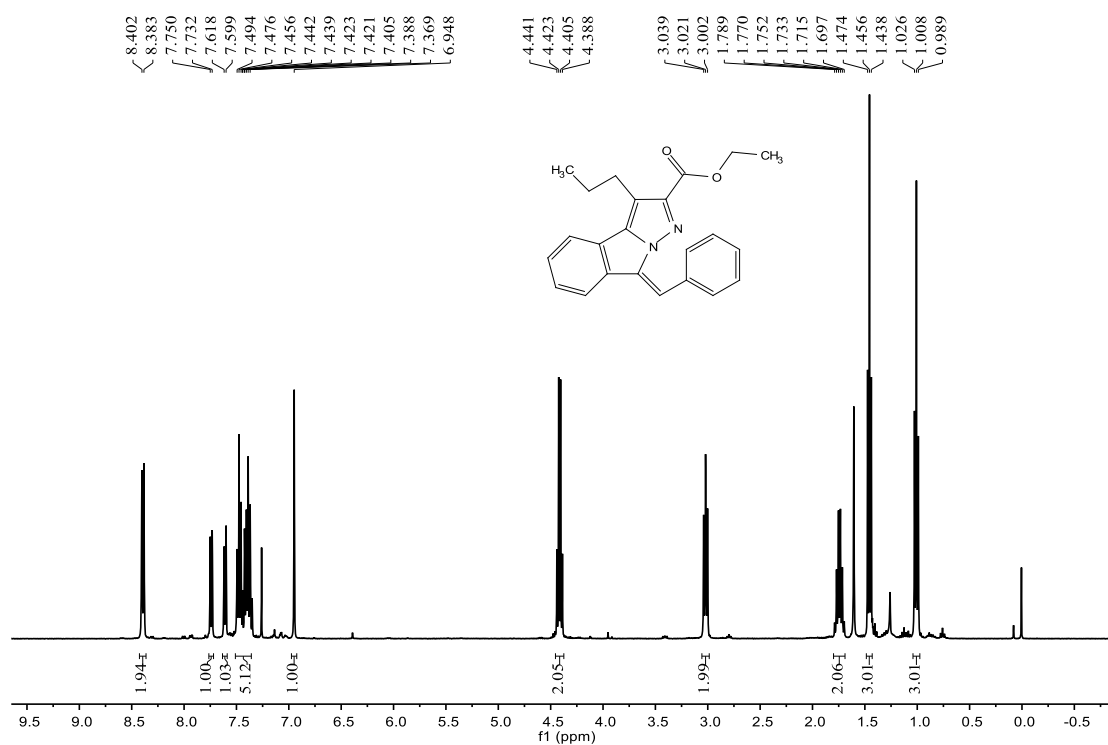

<sup>13</sup>C NMR spectra of compound **3ao**.

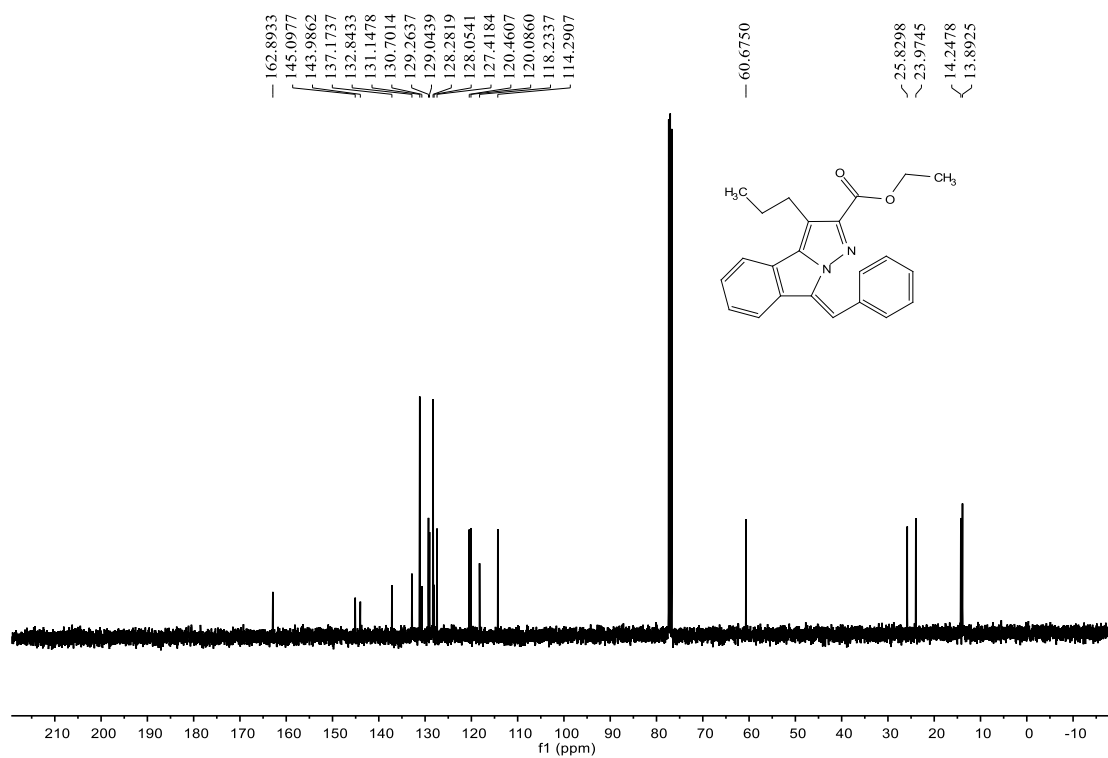

<sup>1</sup>H NMR spectra of compound **3ap**.

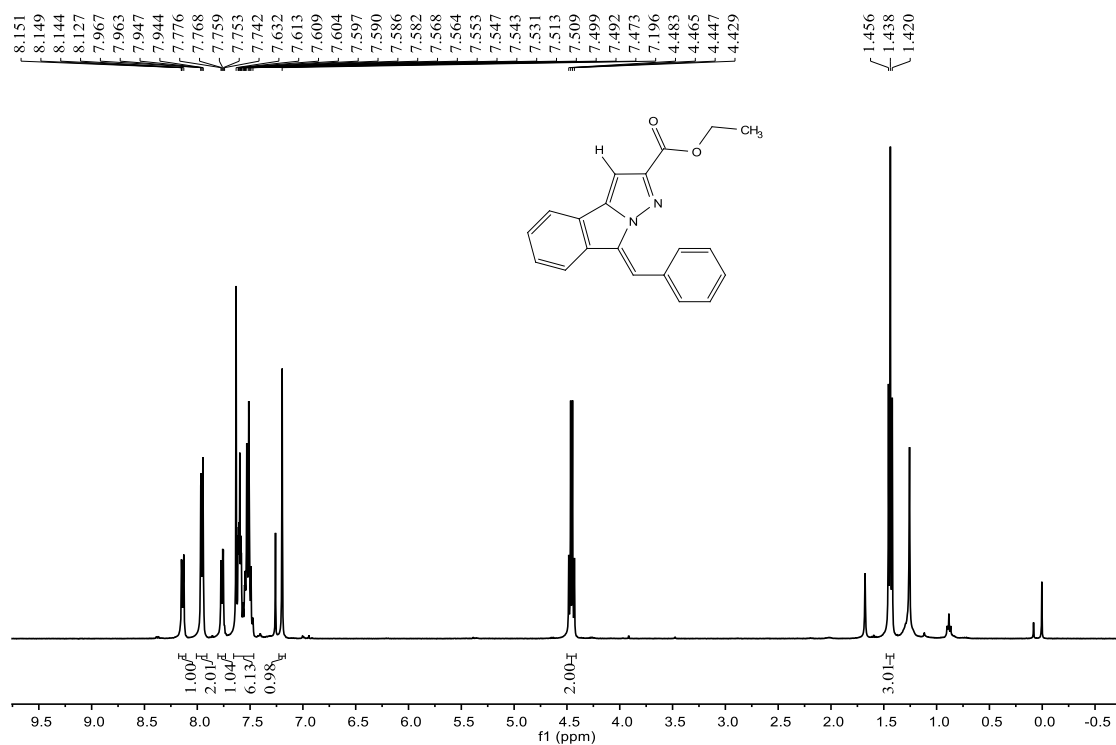

<sup>1</sup>H NMR spectra of compound **3ap**.

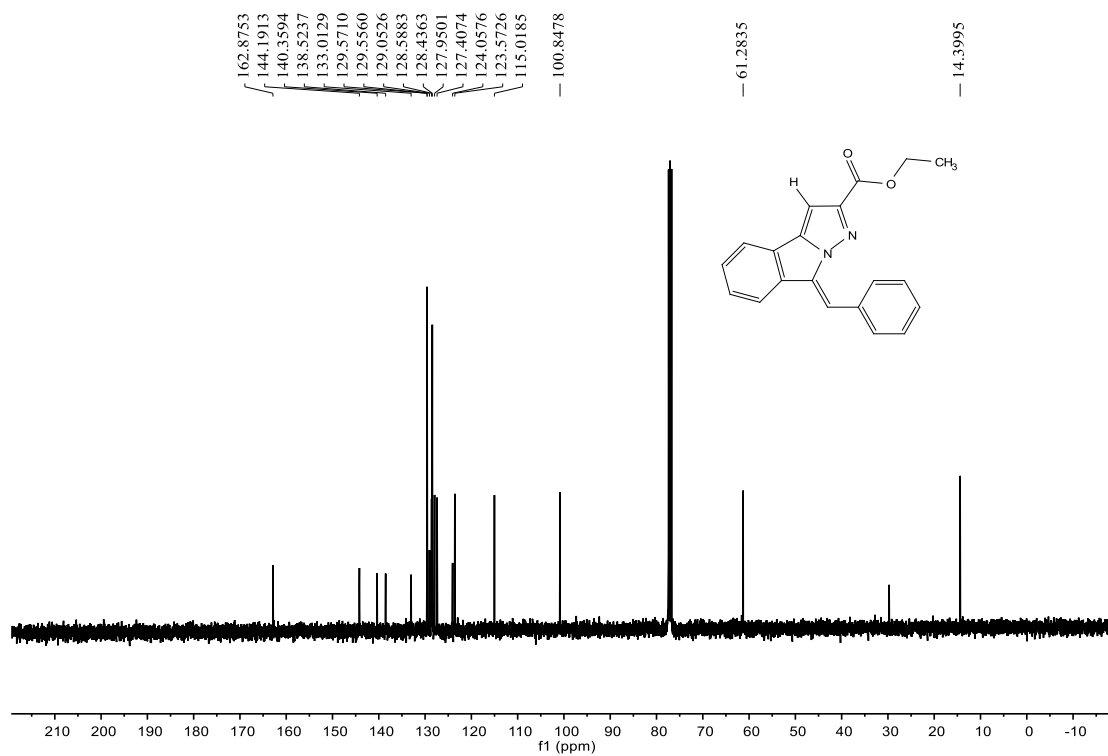

<sup>1</sup>H NMR spectra of compound **3aq**.

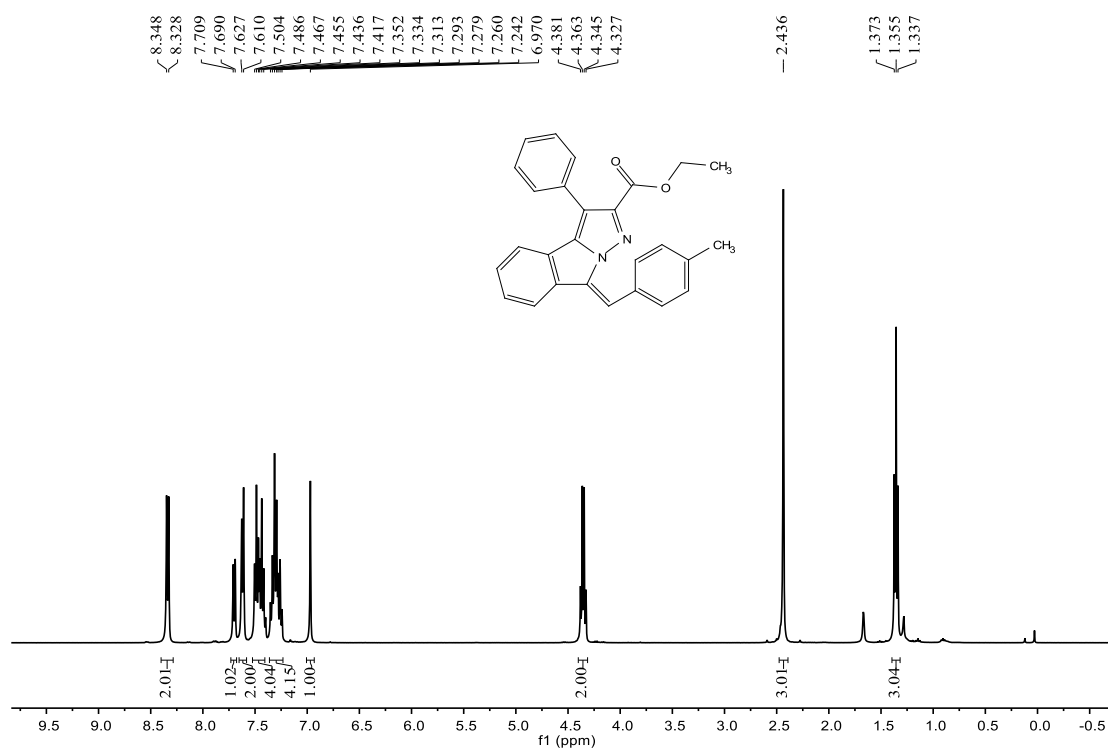

<sup>13</sup>C NMR spectra of compound **3aq**.

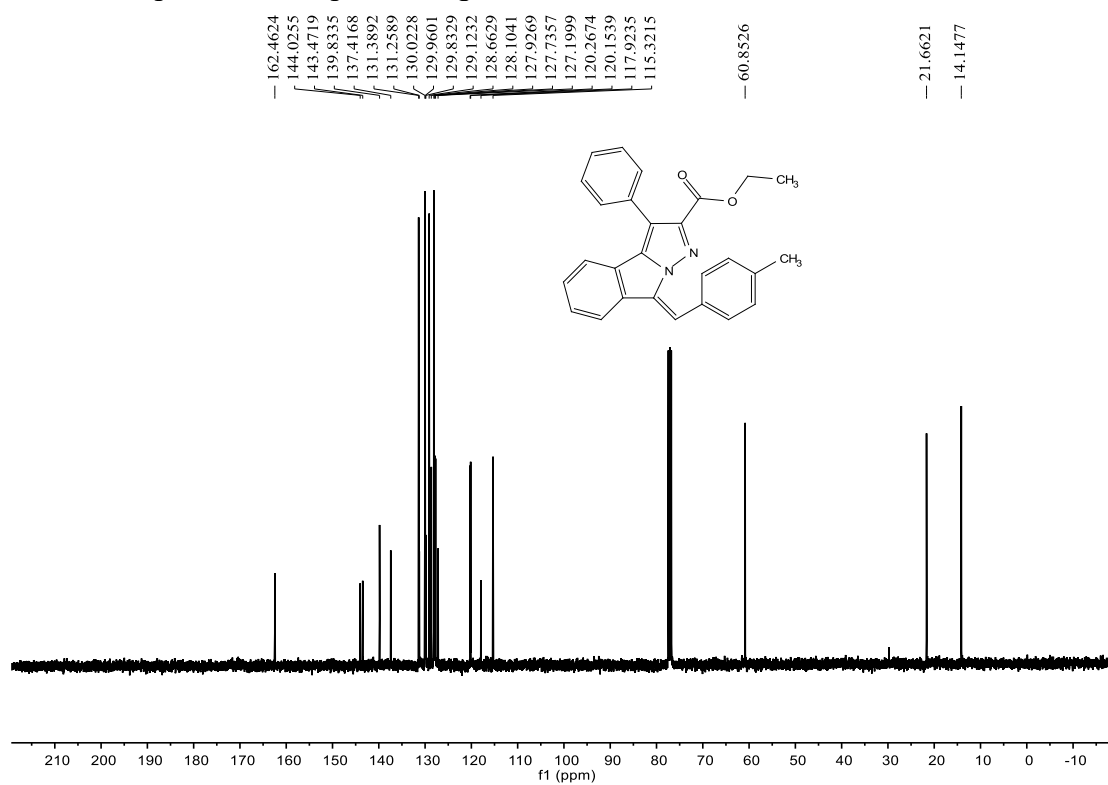

<sup>1</sup>H NMR spectra of compound **3ar**.

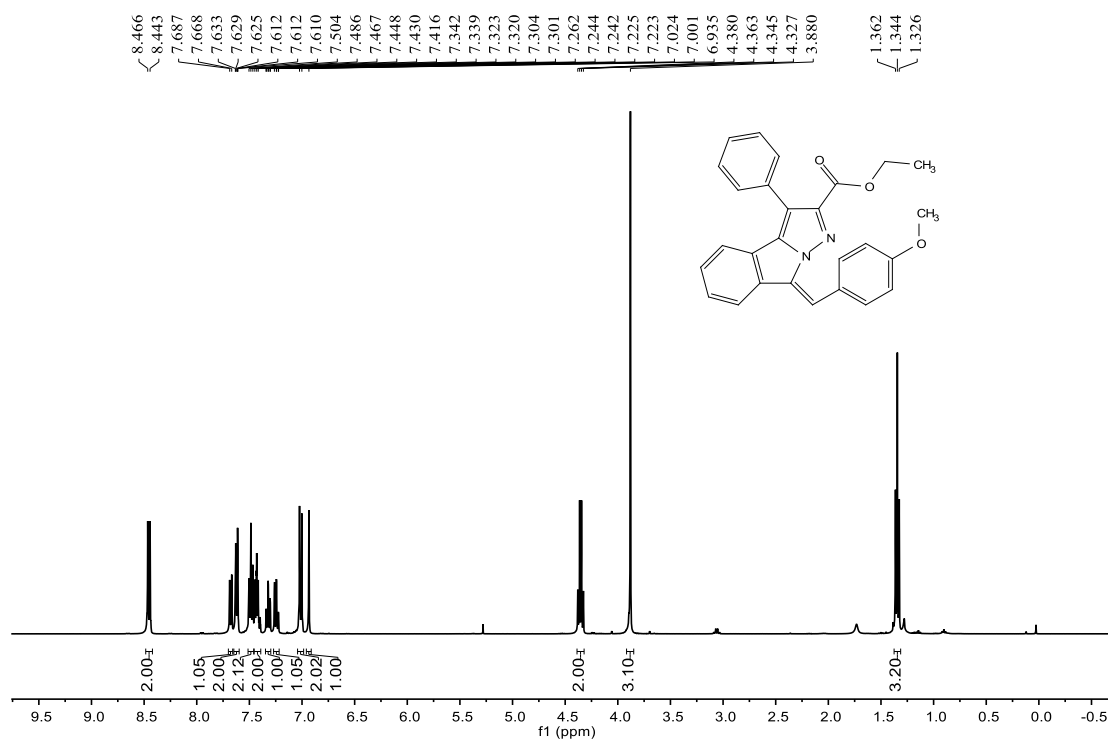

<sup>13</sup>C NMR spectra of compound **3ar**.

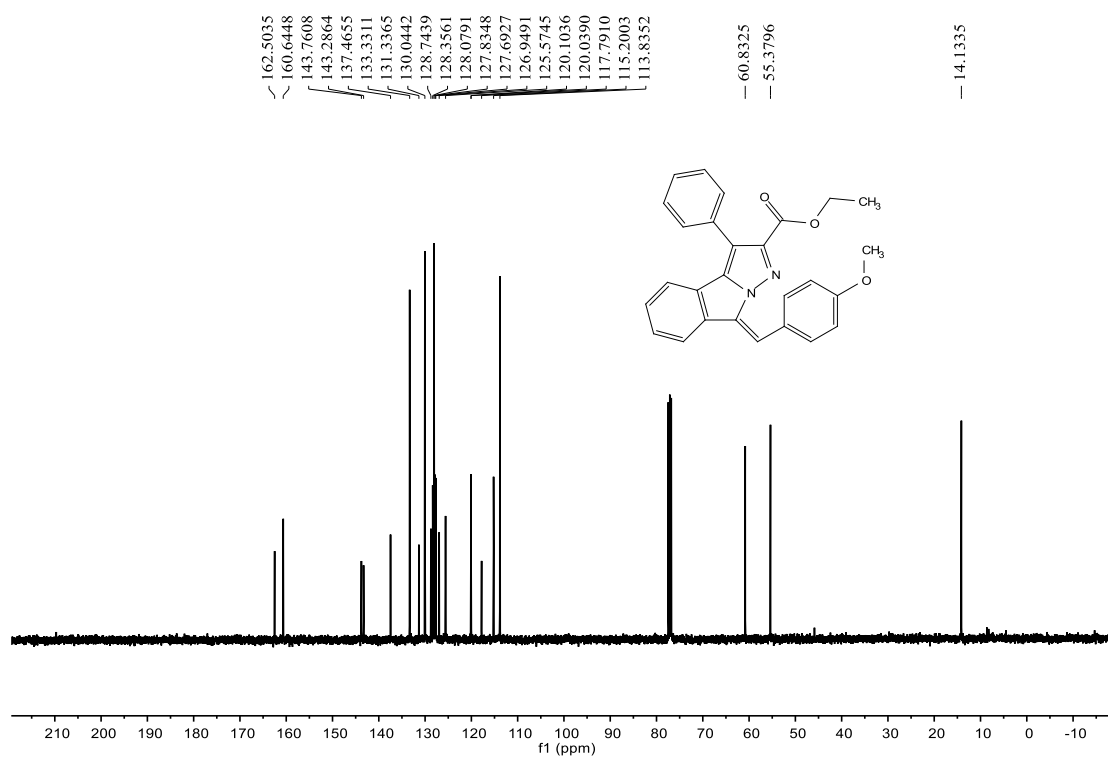

<sup>1</sup>H NMR spectra of compound **3as**.

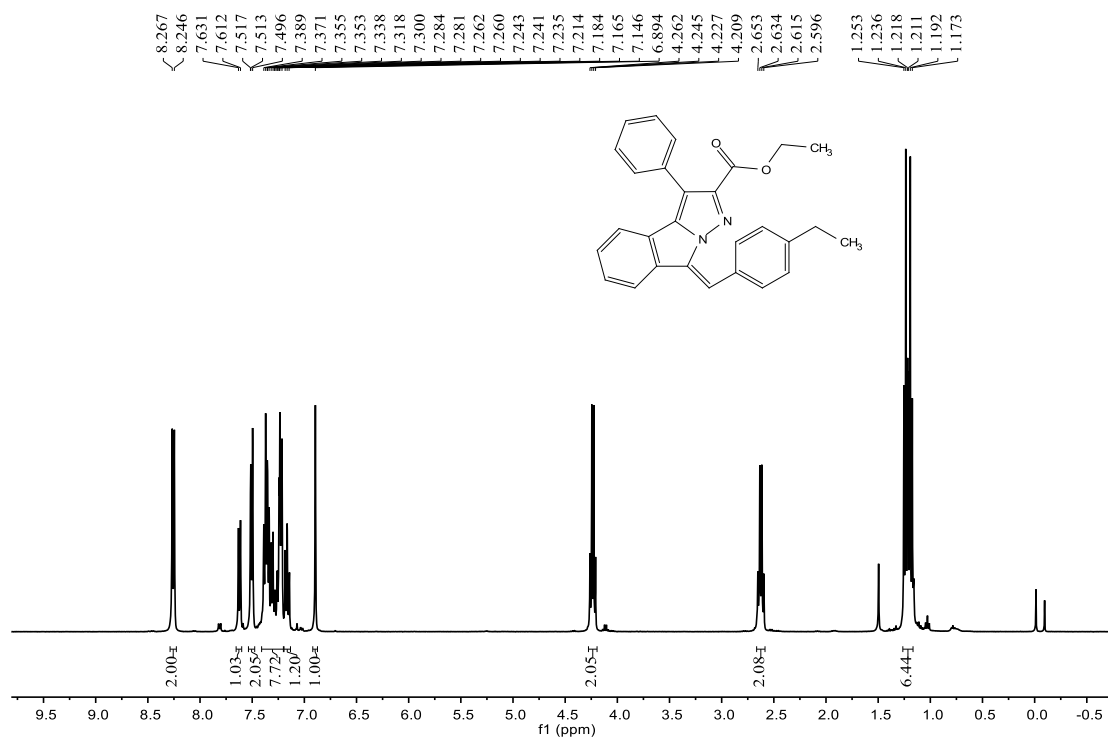

<sup>13</sup>C NMR spectra of compound **3as**.

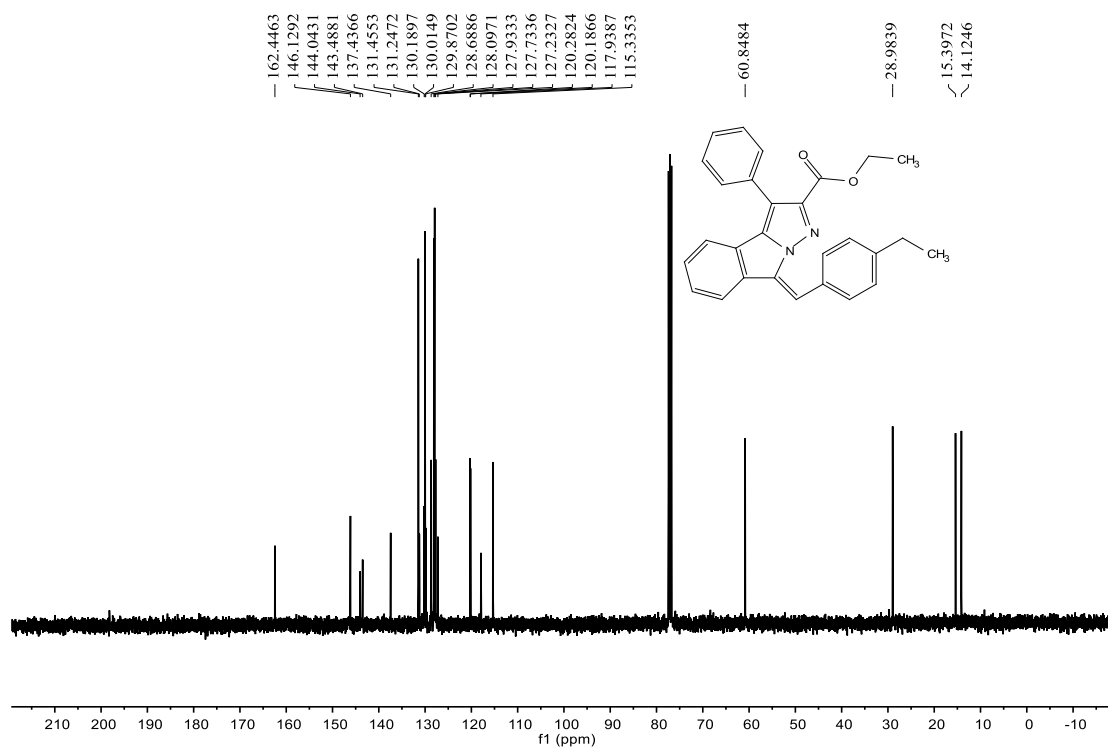

<sup>1</sup>H NMR spectra of compound **3at**.

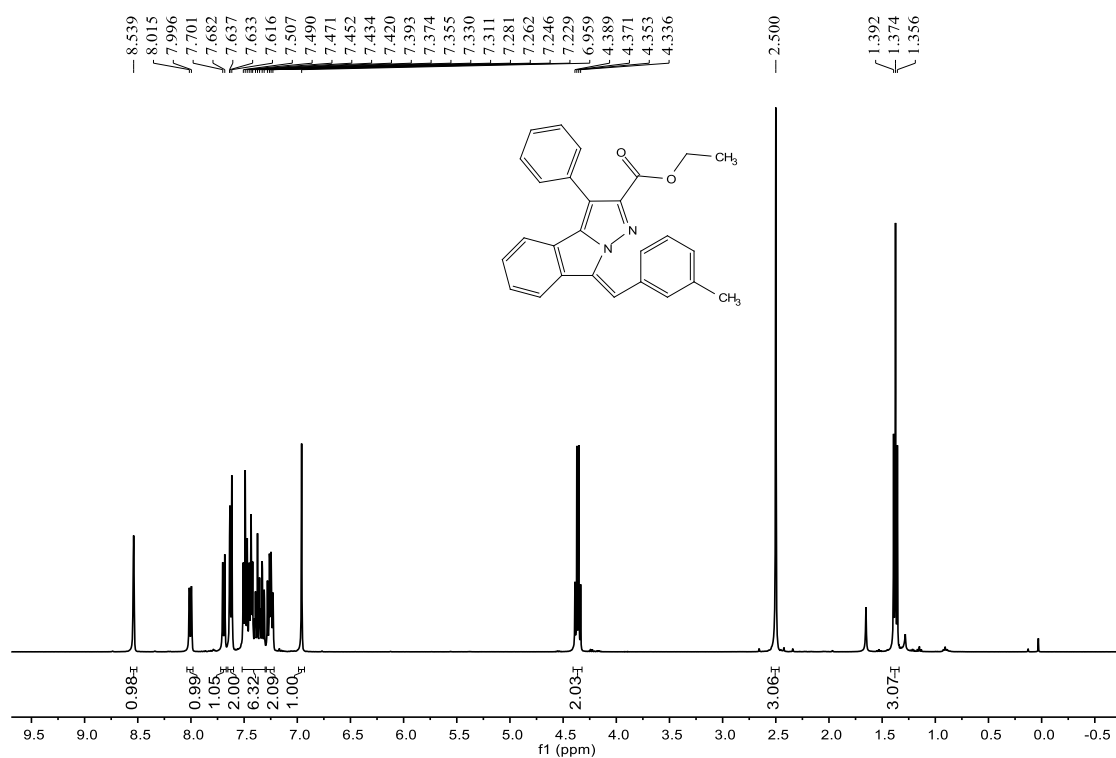

<sup>13</sup>C NMR spectra of compound **3at**.

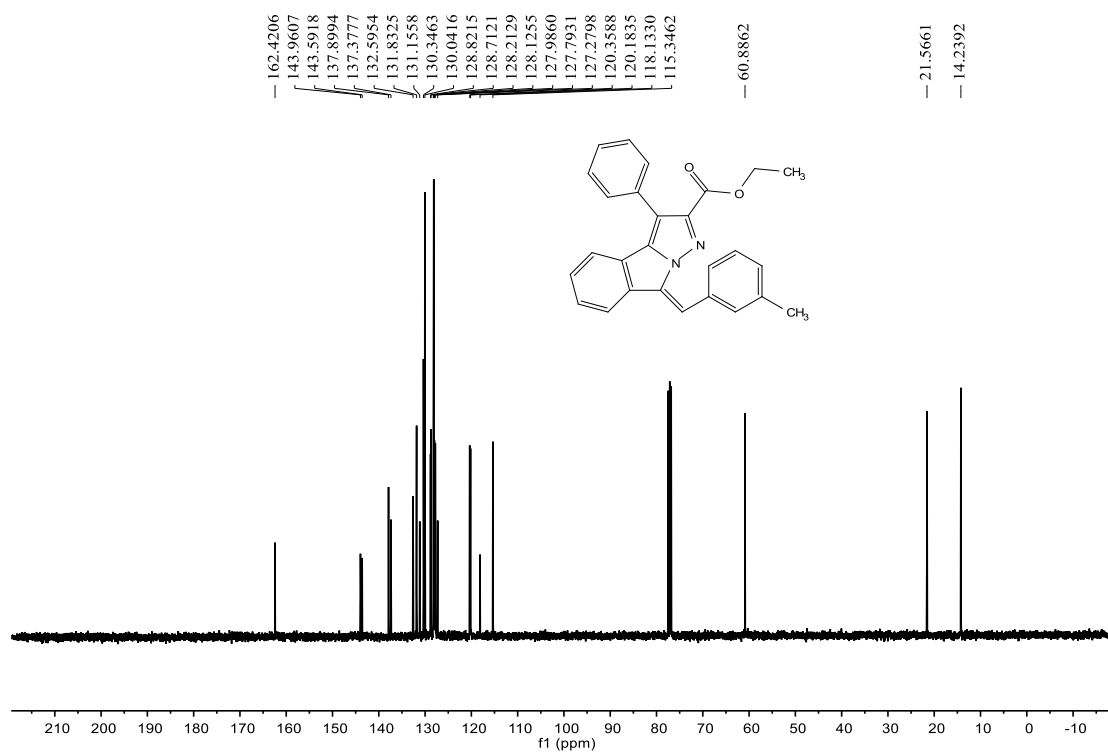

<sup>1</sup>H NMR spectra of compound **3au**.

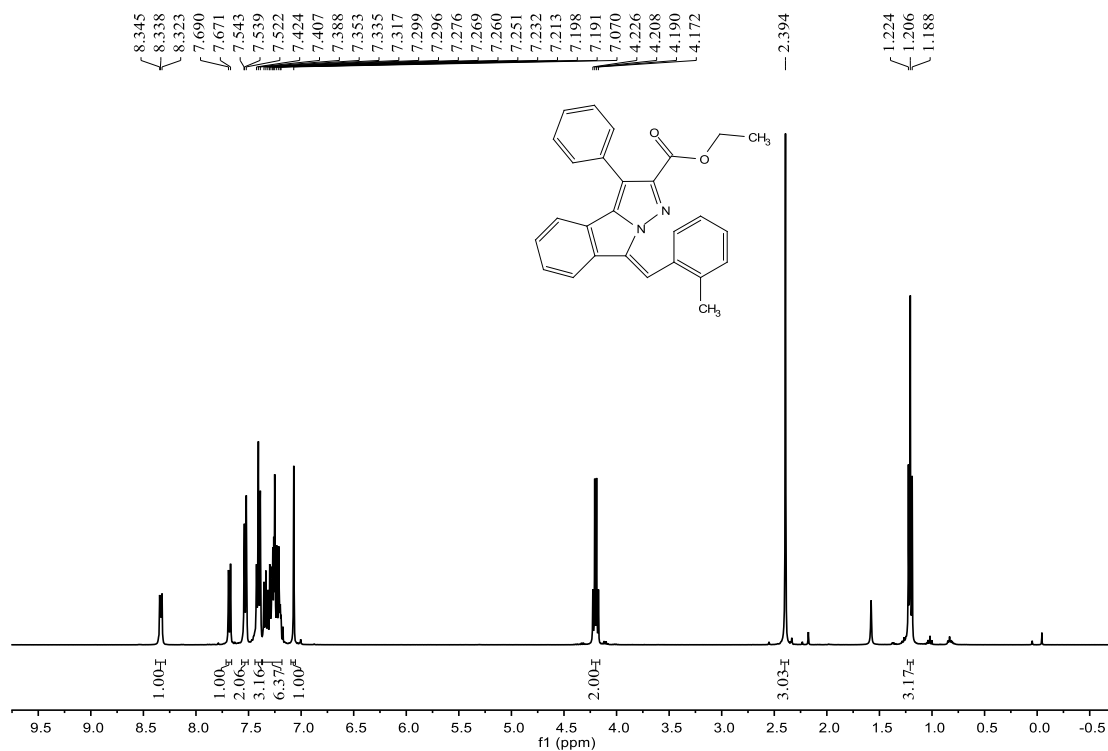

<sup>13</sup>C NMR spectra of compound **3au**.

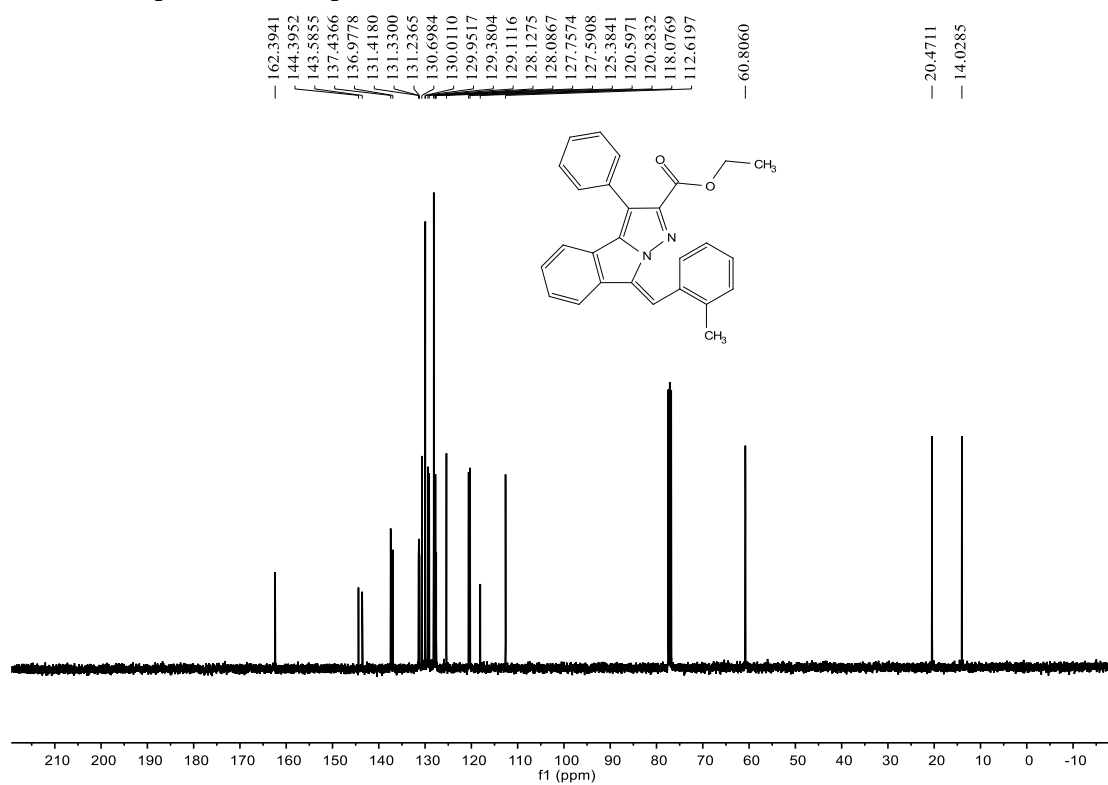

<sup>1</sup>H NMR spectra of compound **3av**.

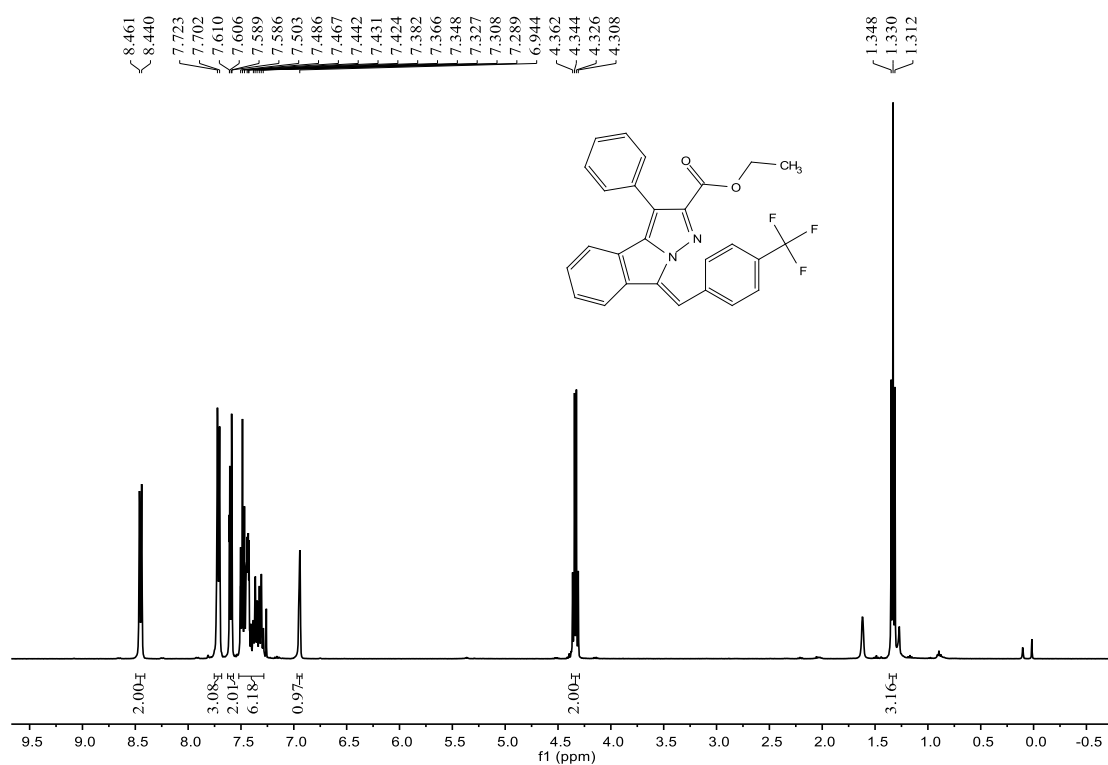

<sup>13</sup>C NMR spectra of compound **3av**.

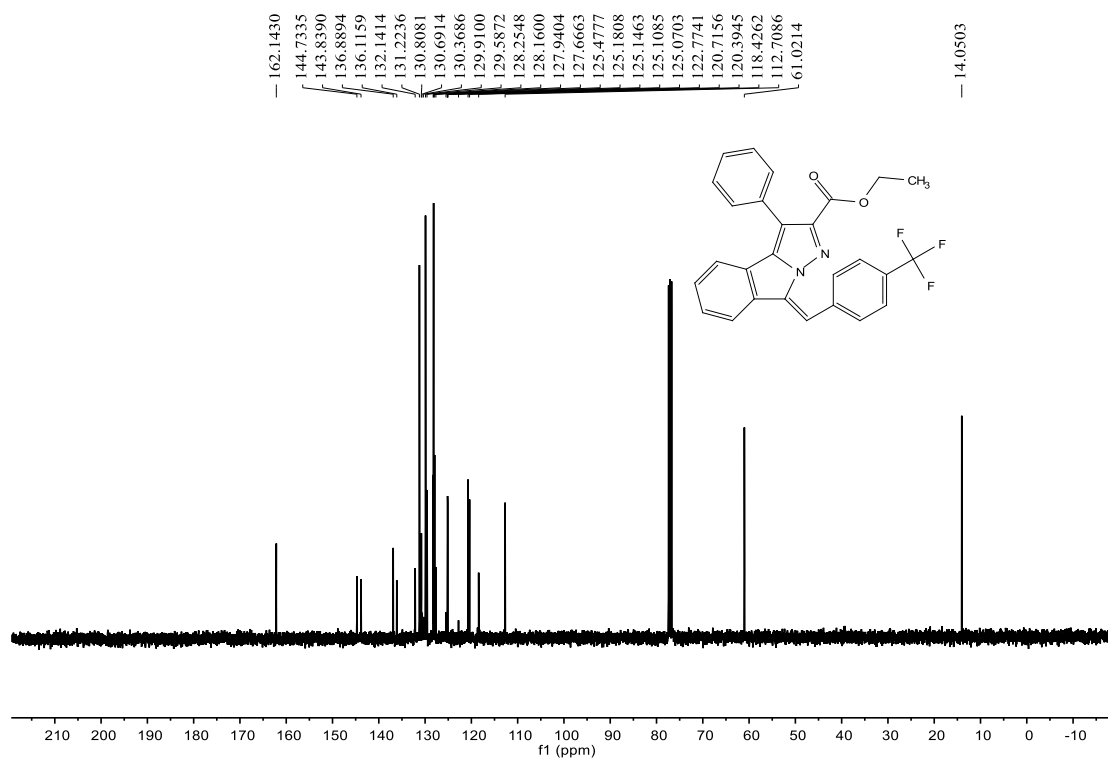

<sup>19</sup>F NMR spectra of compound **3av**.

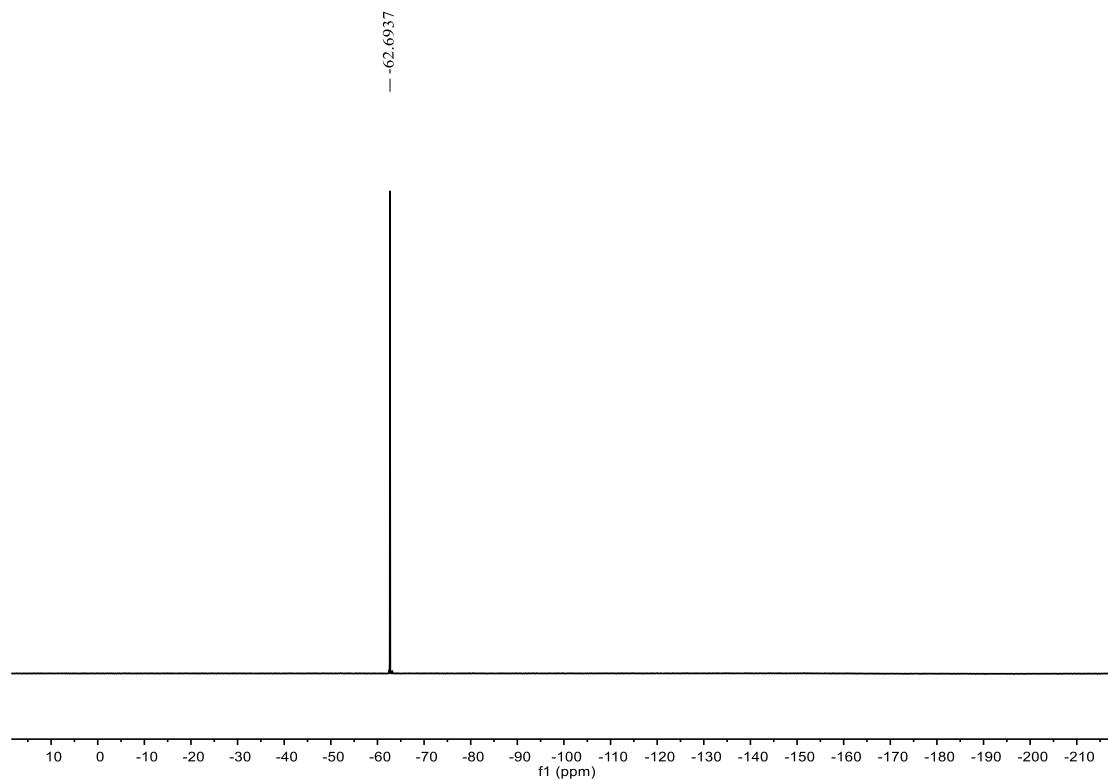

<sup>1</sup>H NMR spectra of compound **3aw**.

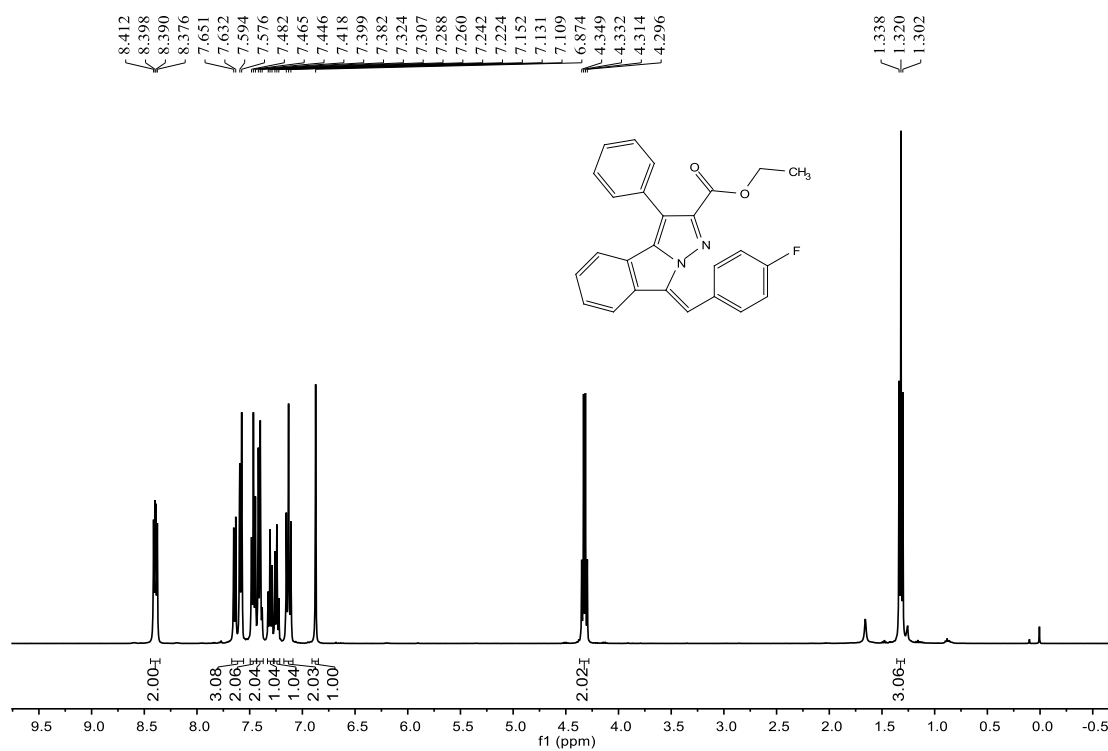

<sup>13</sup>C NMR spectra of compound **3aw**.

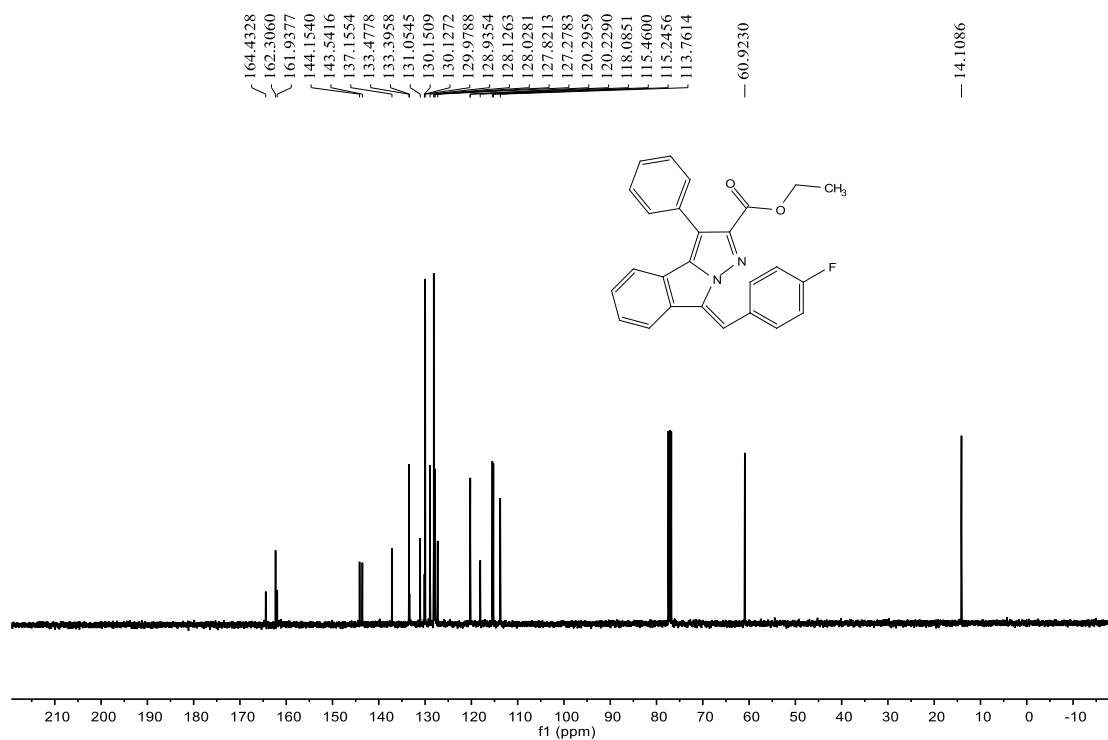

$^{19}\text{F}$  NMR spectra of compound **3aw**.

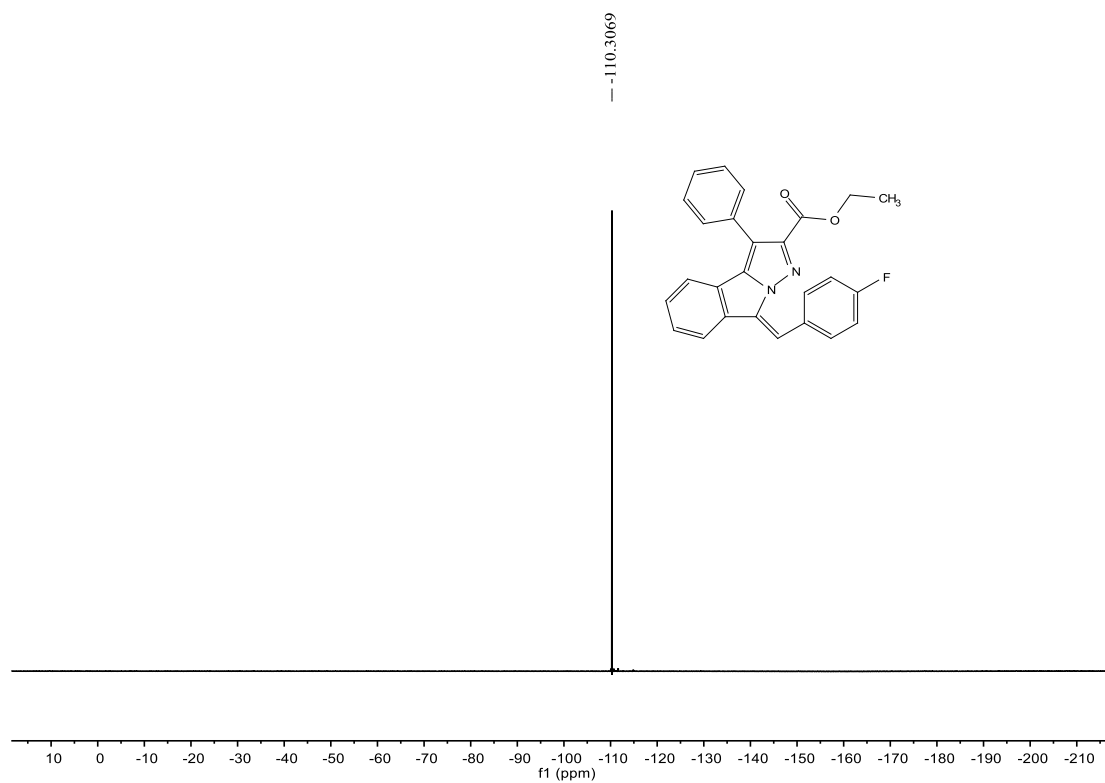

$^1\text{H}$  NMR spectra of compound **3ax**.

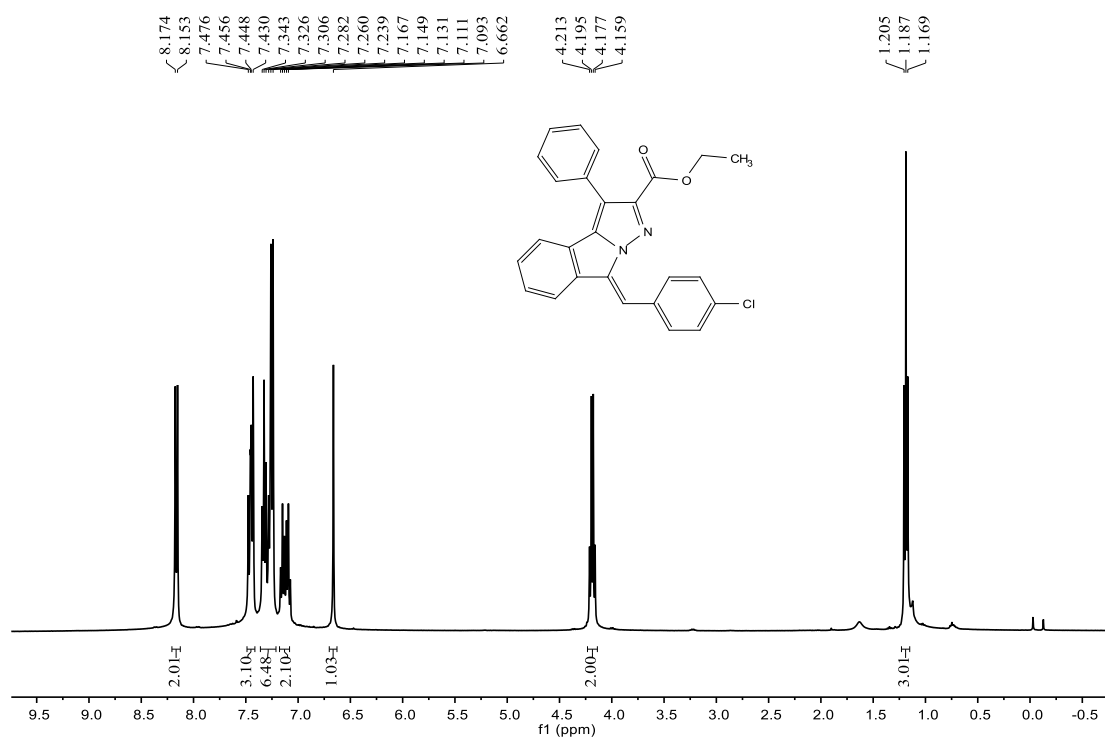

<sup>13</sup>C NMR spectra of compound **3ax**.

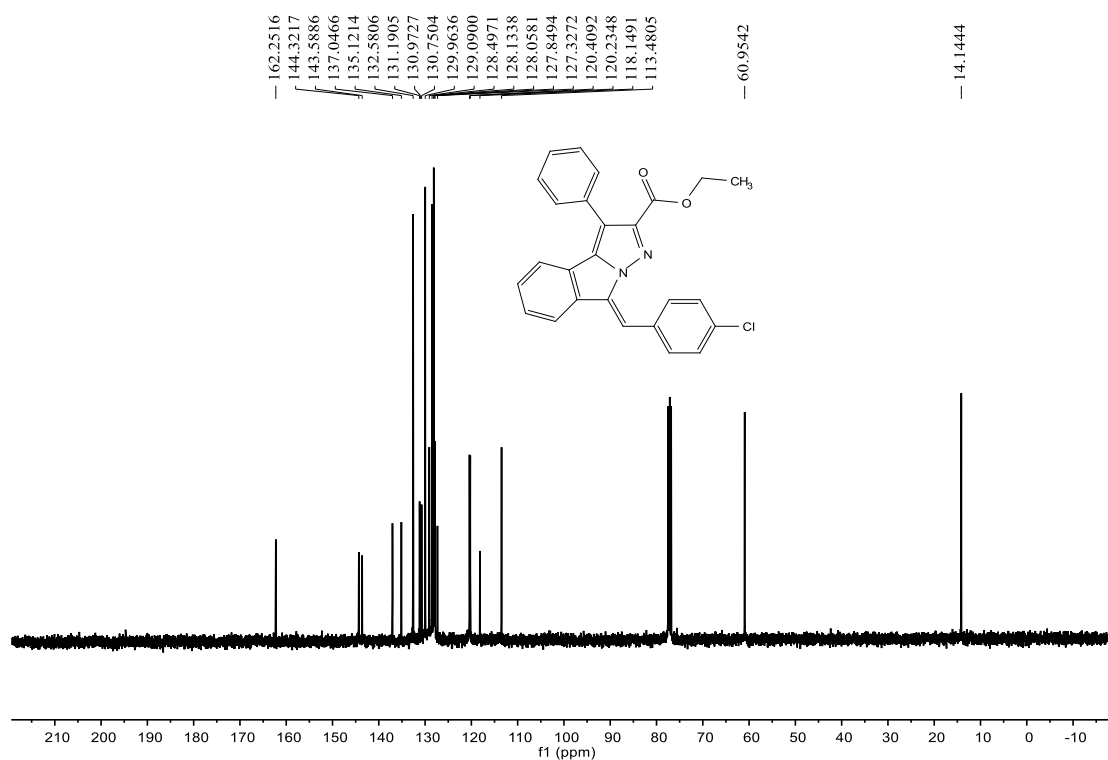

<sup>1</sup>H NMR spectra of compound **3ay**.

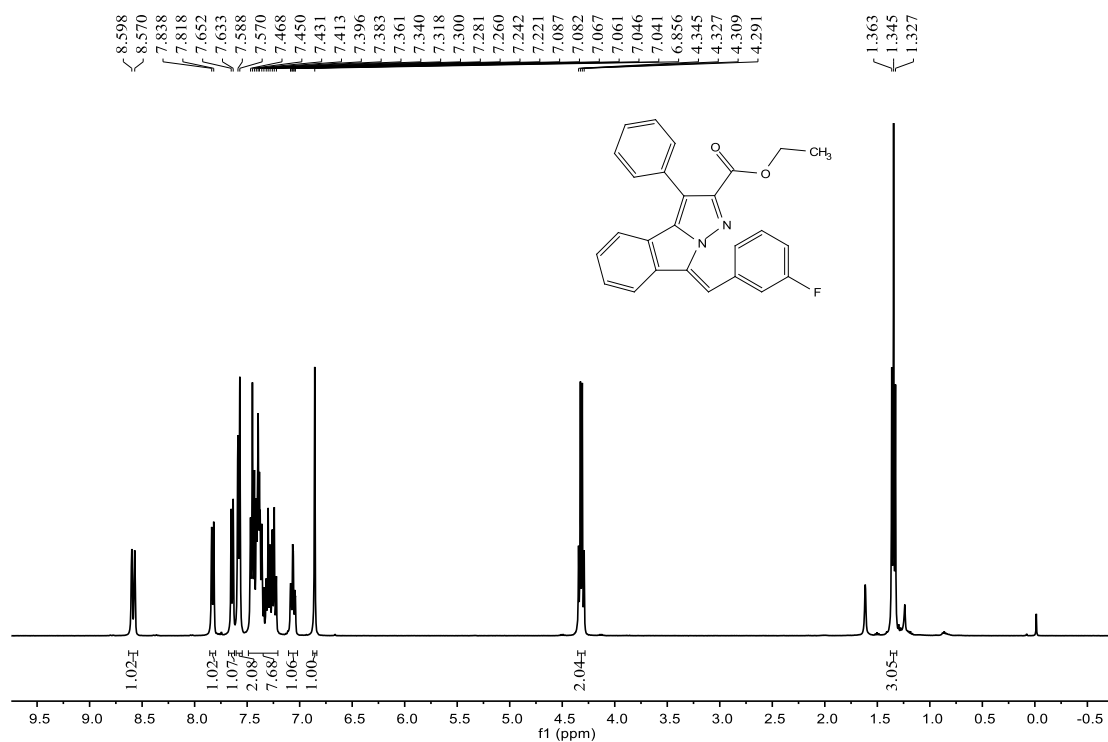

<sup>13</sup>C NMR spectra of compound **3ay**.

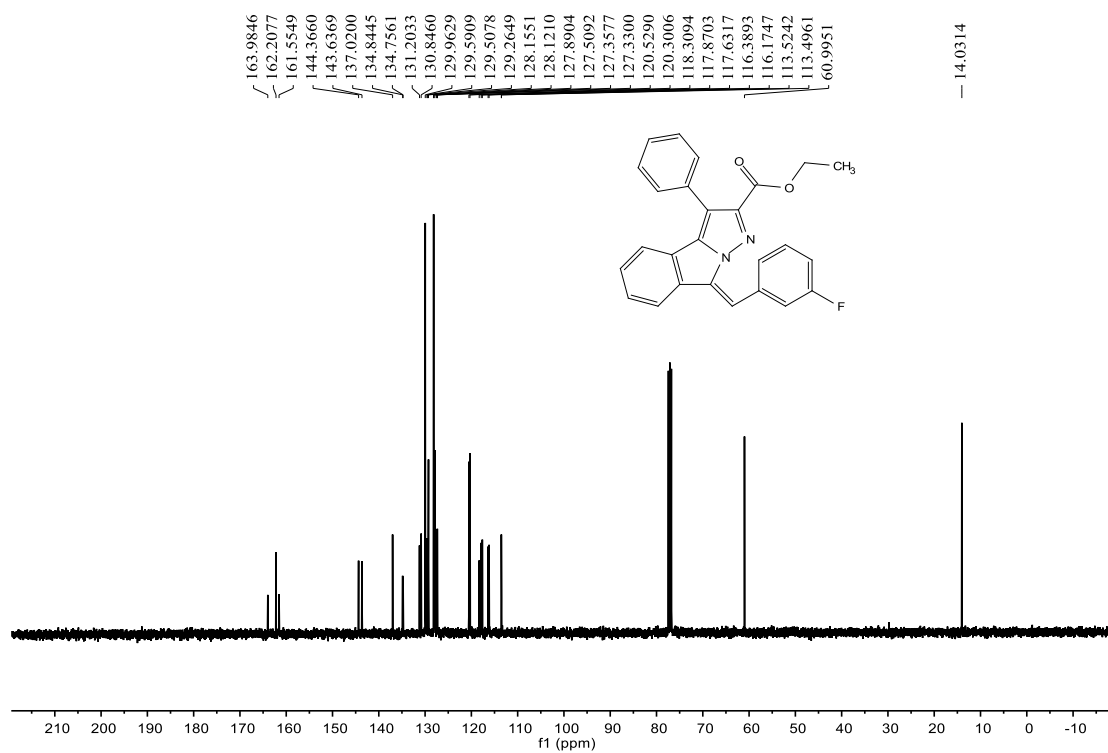

<sup>19</sup>F NMR spectra of compound **3ay**.

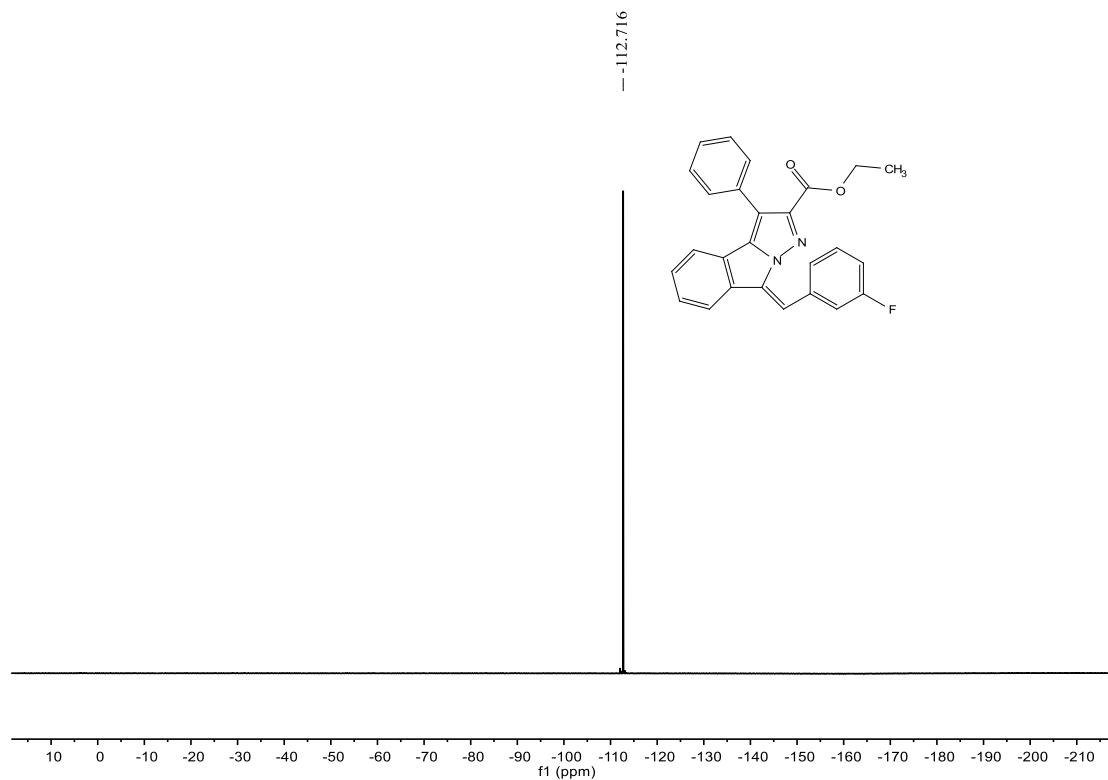

<sup>1</sup>H NMR spectra of compound **3az**.

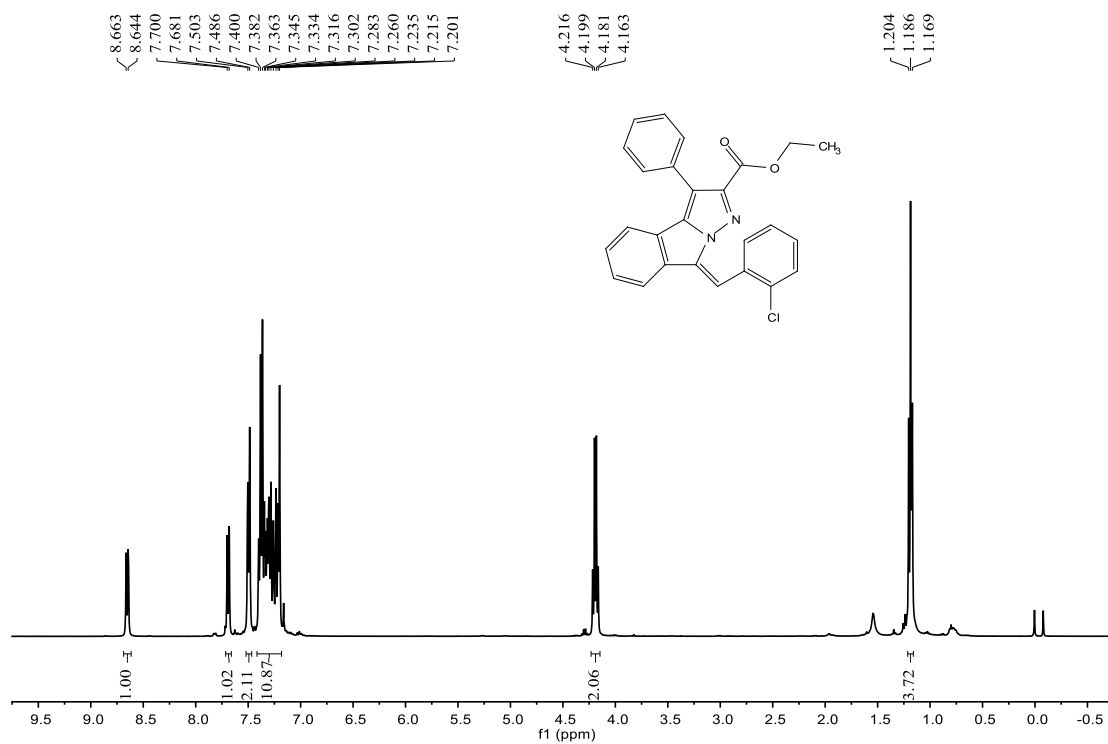

<sup>13</sup>C NMR spectra of compound **3az**.

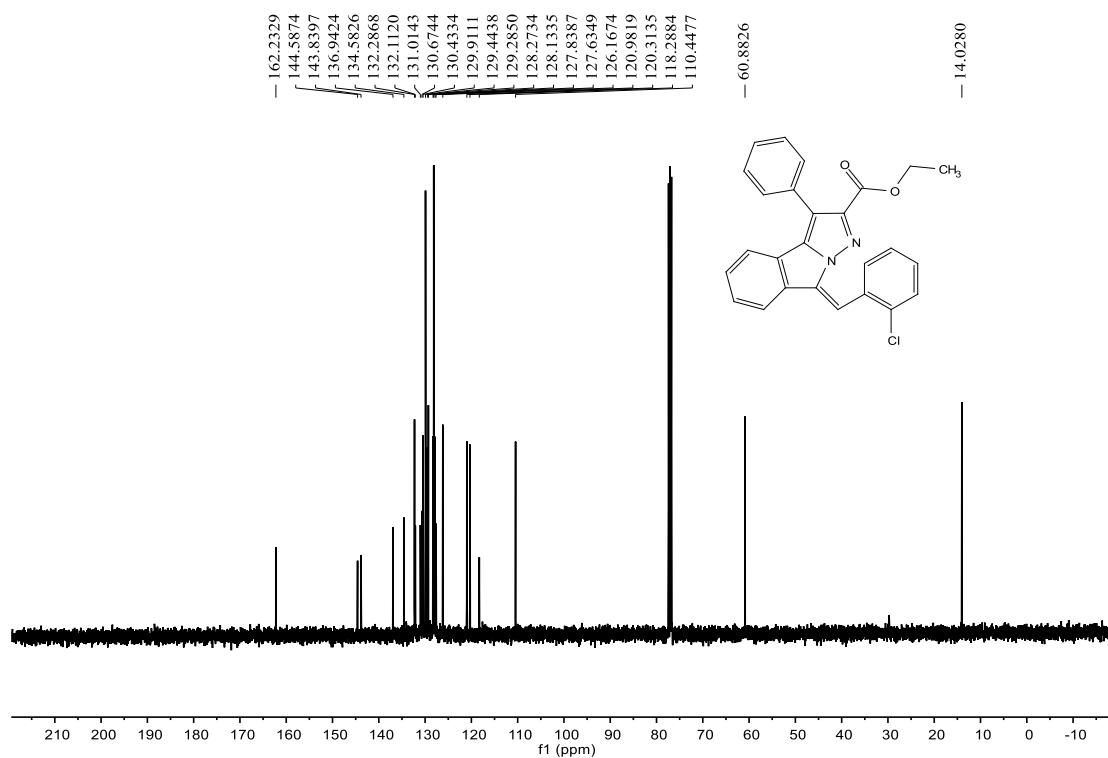

<sup>1</sup>H NMR spectra of compound **3aaa**.

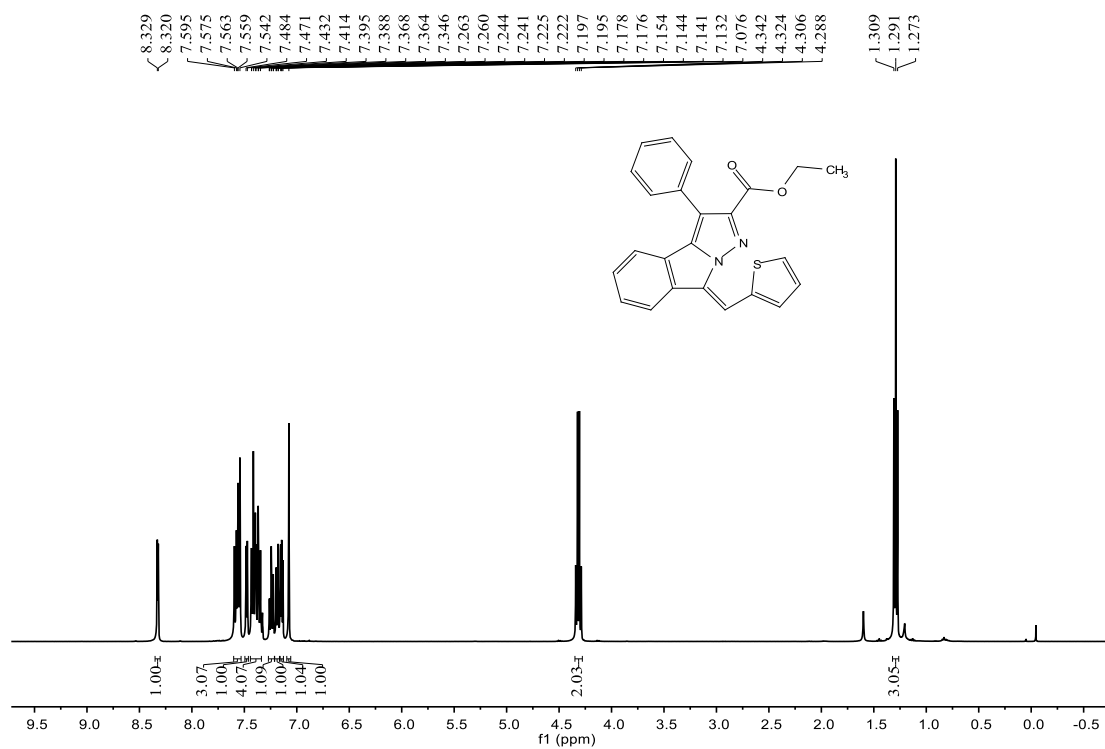

<sup>13</sup>C NMR spectra of compound **3aaa**.

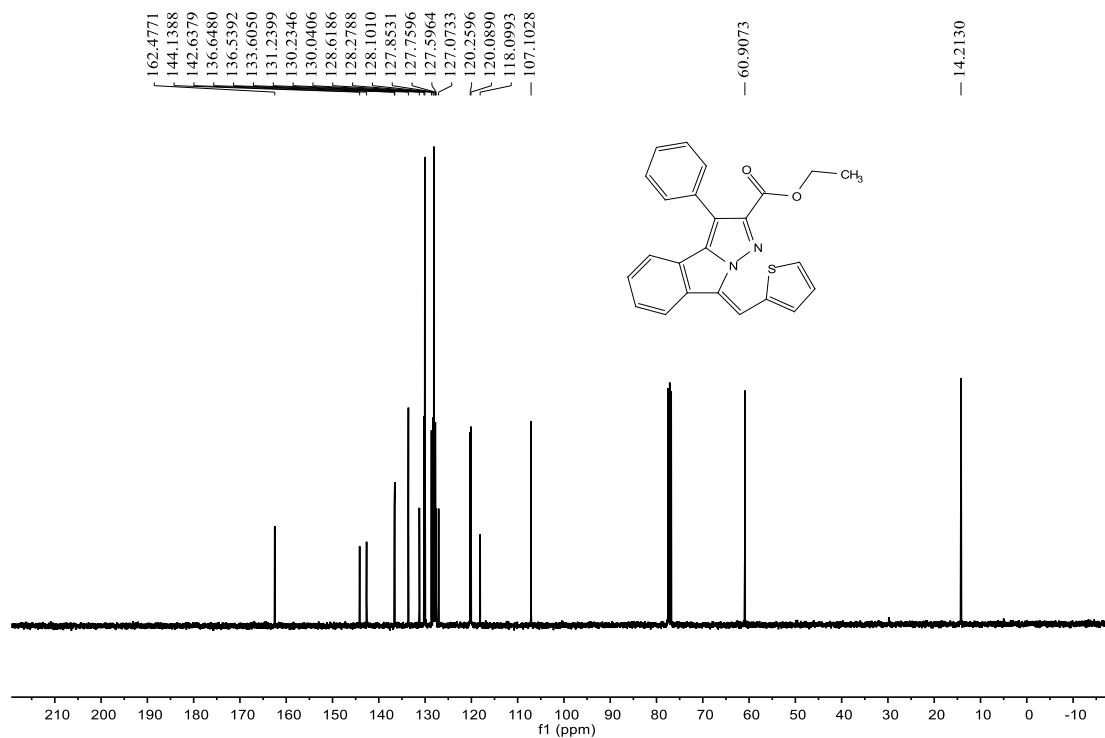

### <sup>1</sup>H NMR spectra of compound **3aab**.

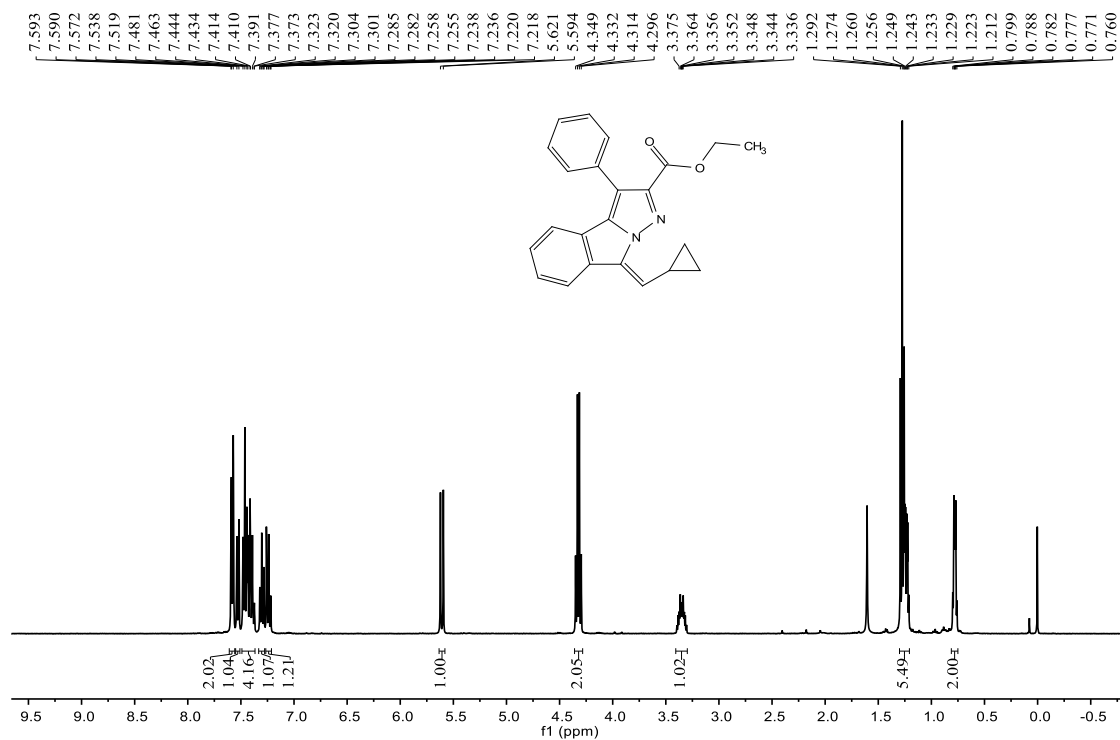

### <sup>13</sup>C NMR spectra of compound **3aab**.

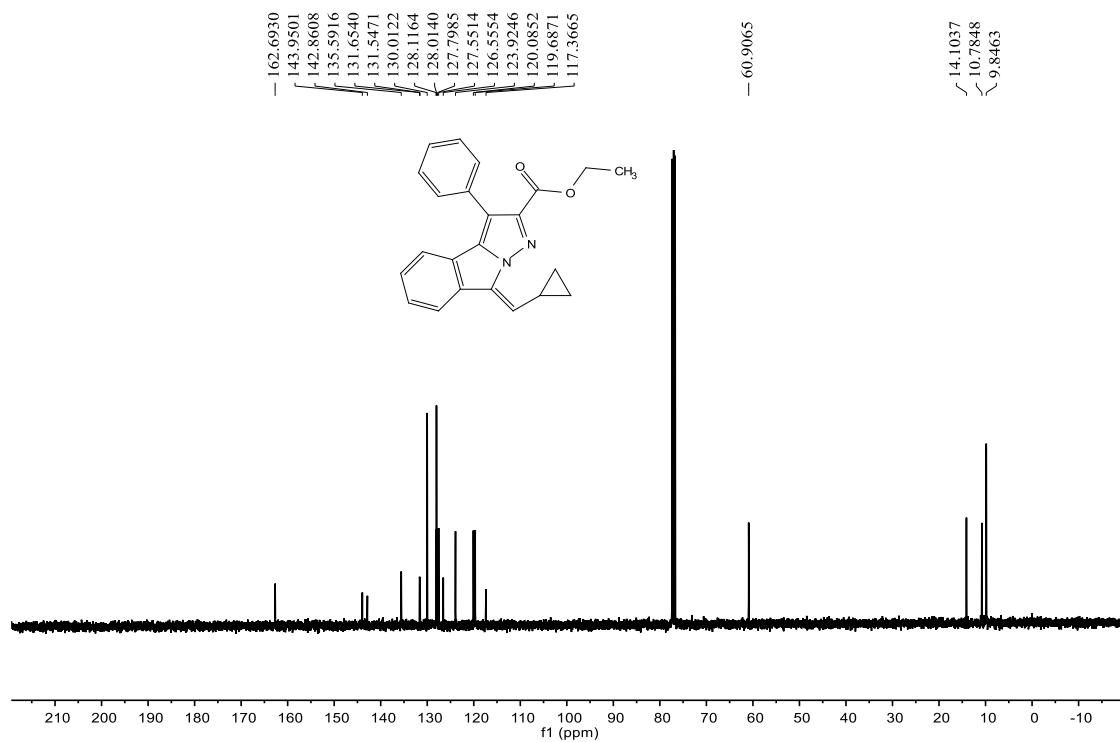

$^1\text{H}$  NMR spectra of compound **3ba**.

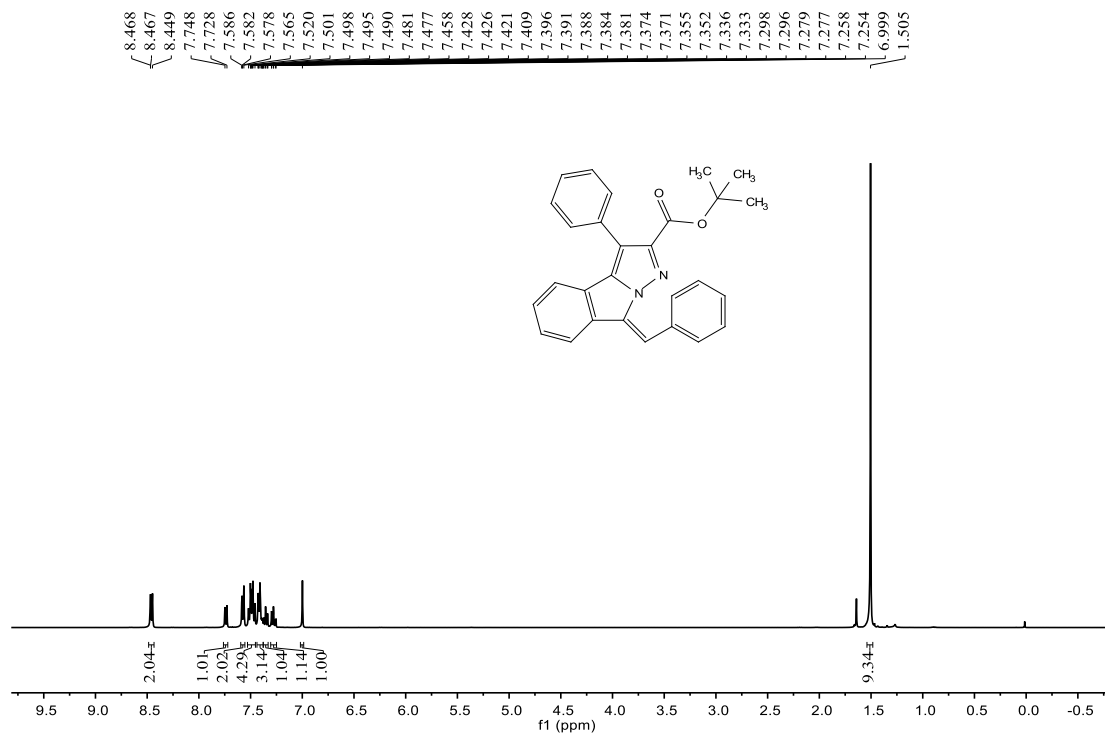

$^{13}\text{C}$  NMR spectra of compound **3ba**.

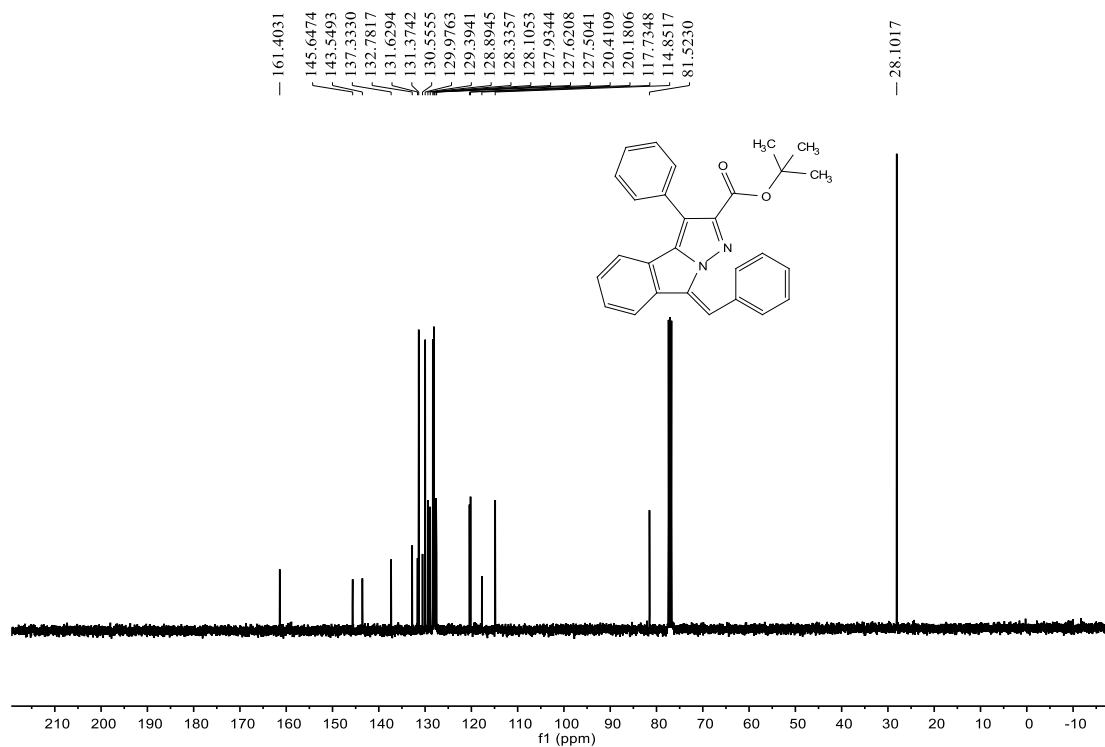

<sup>1</sup>H NMR spectra of compound **3ca**.

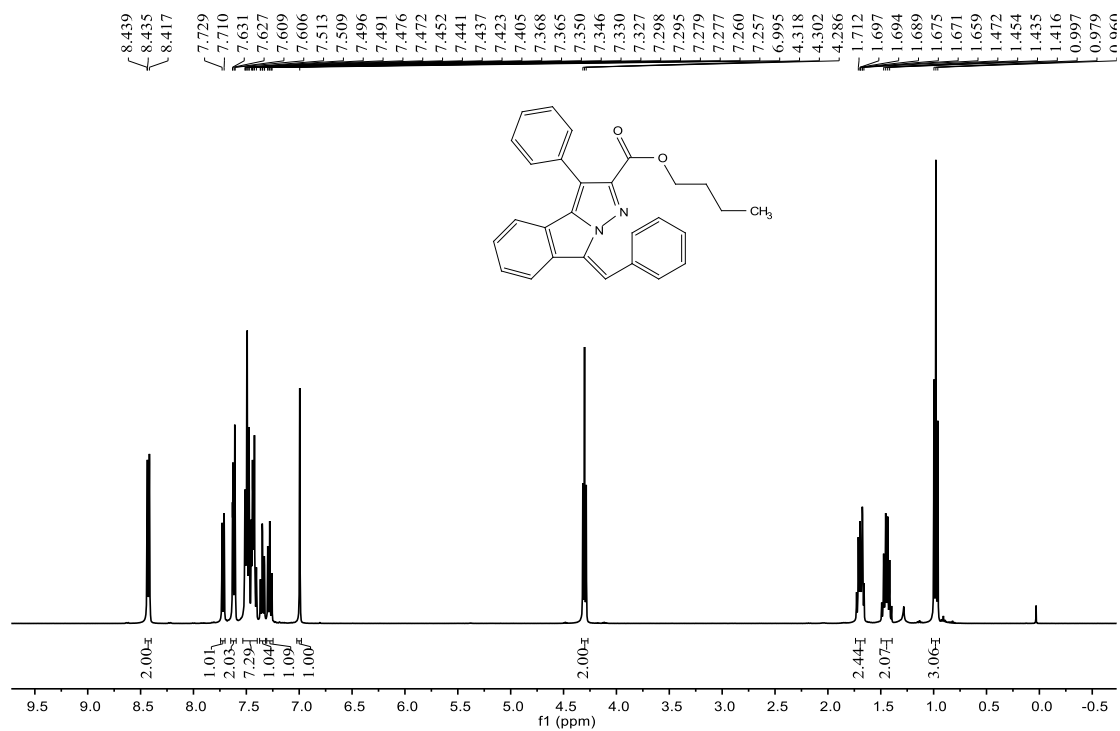

<sup>13</sup>C NMR spectra of compound **3ca**.

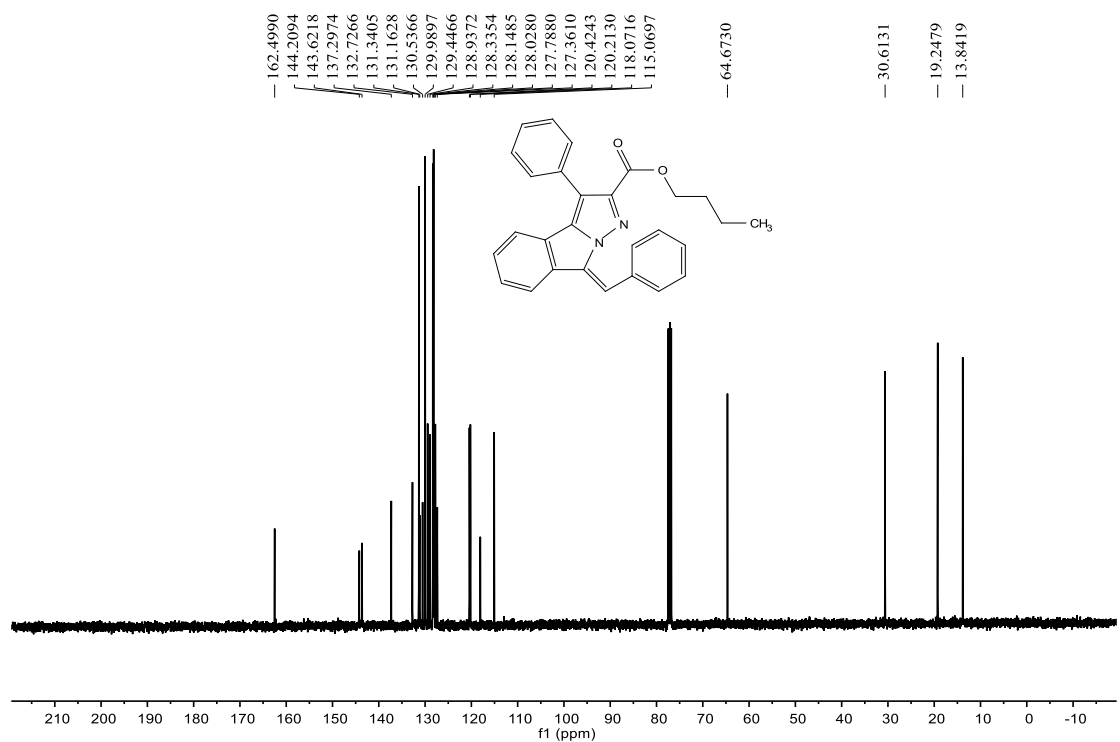

### <sup>1</sup>H NMR spectra of compound **3da**.

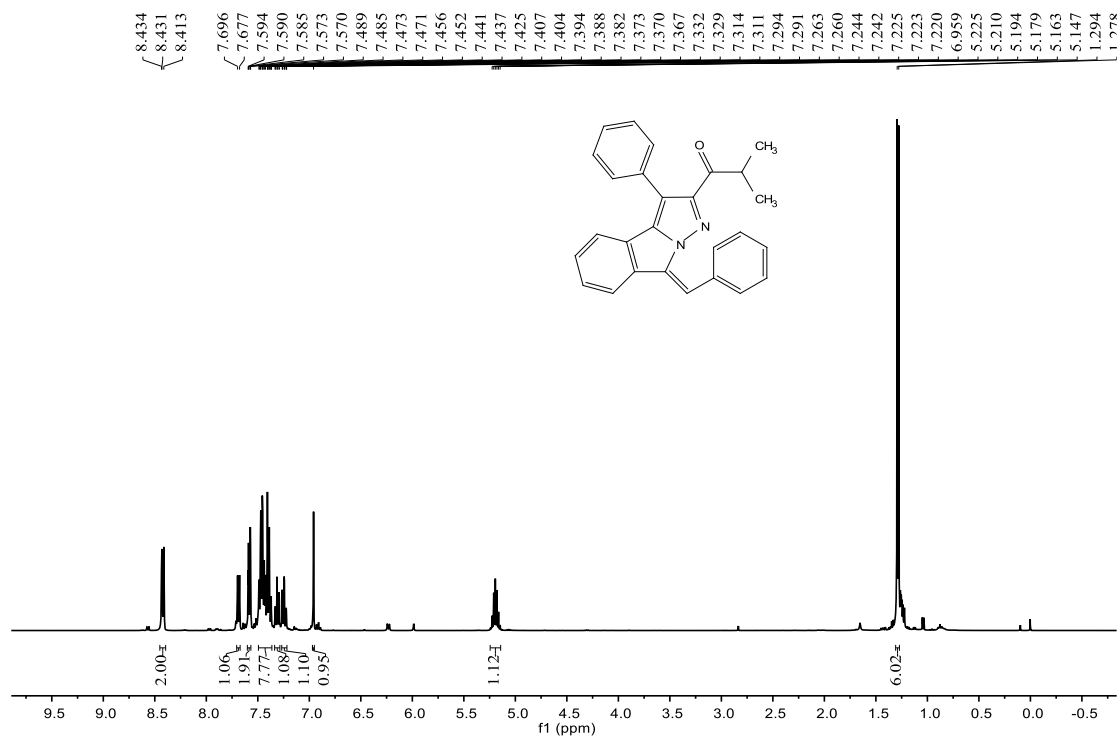

### <sup>13</sup>C NMR spectra of compound **3da**.

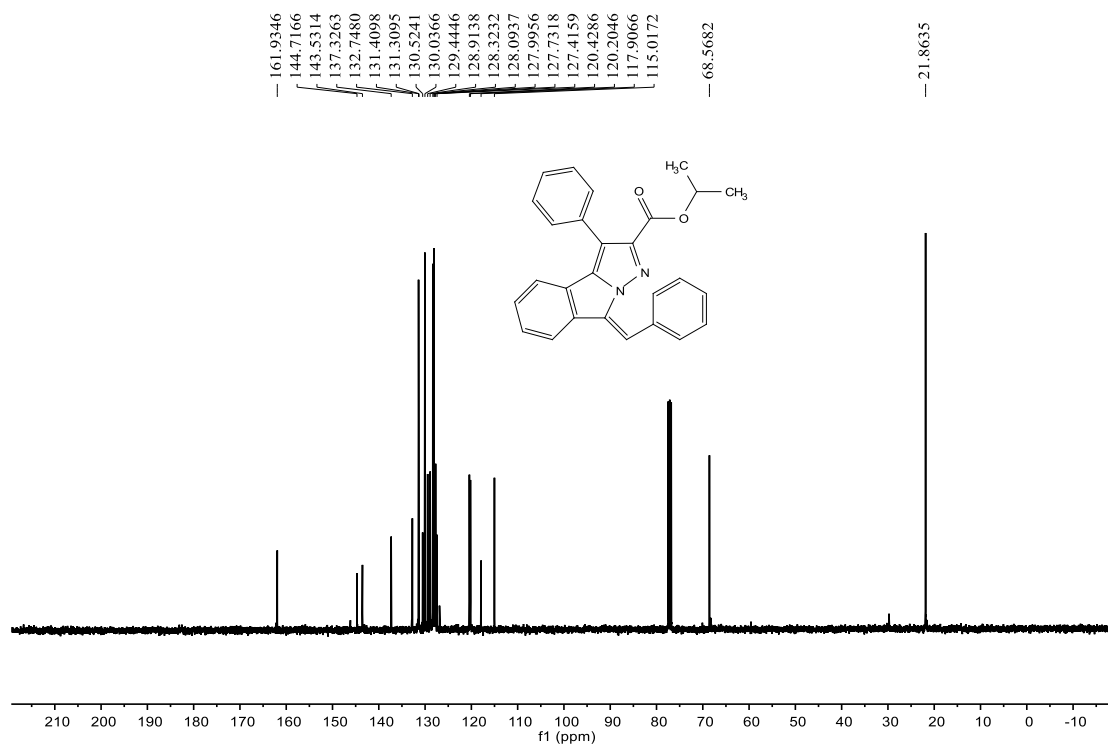

$^1\text{H}$  NMR spectra of compound **3ea**.

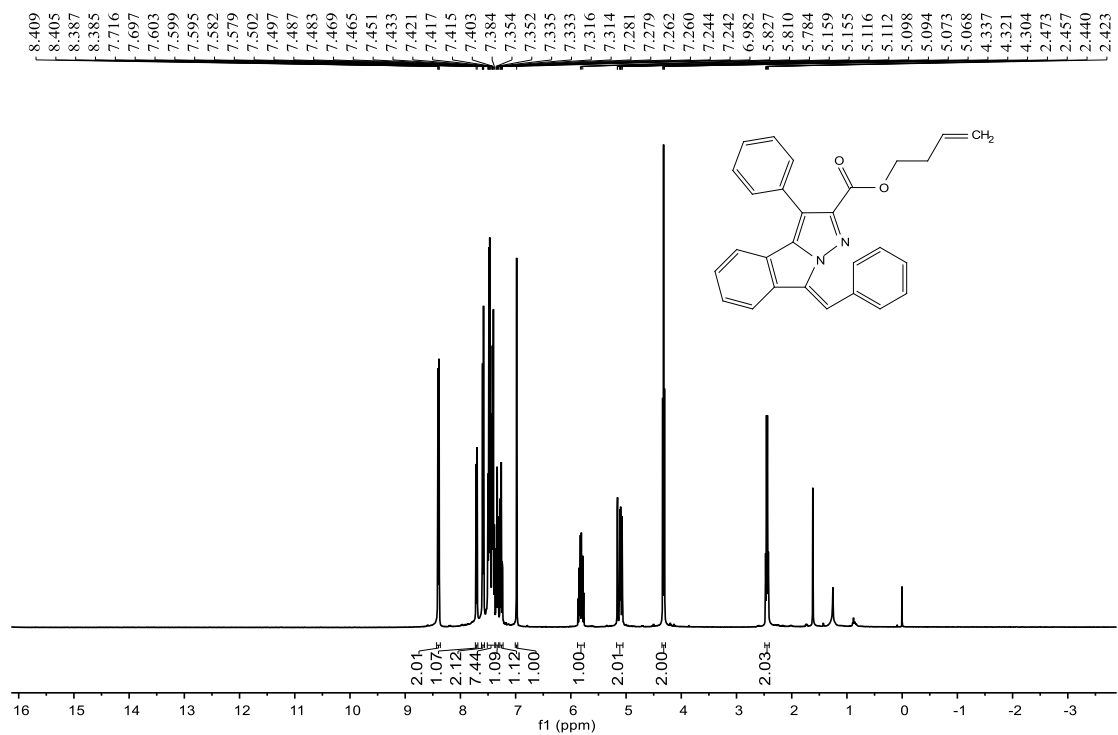

$^{13}\text{C}$  NMR spectra of compound **3ea**.

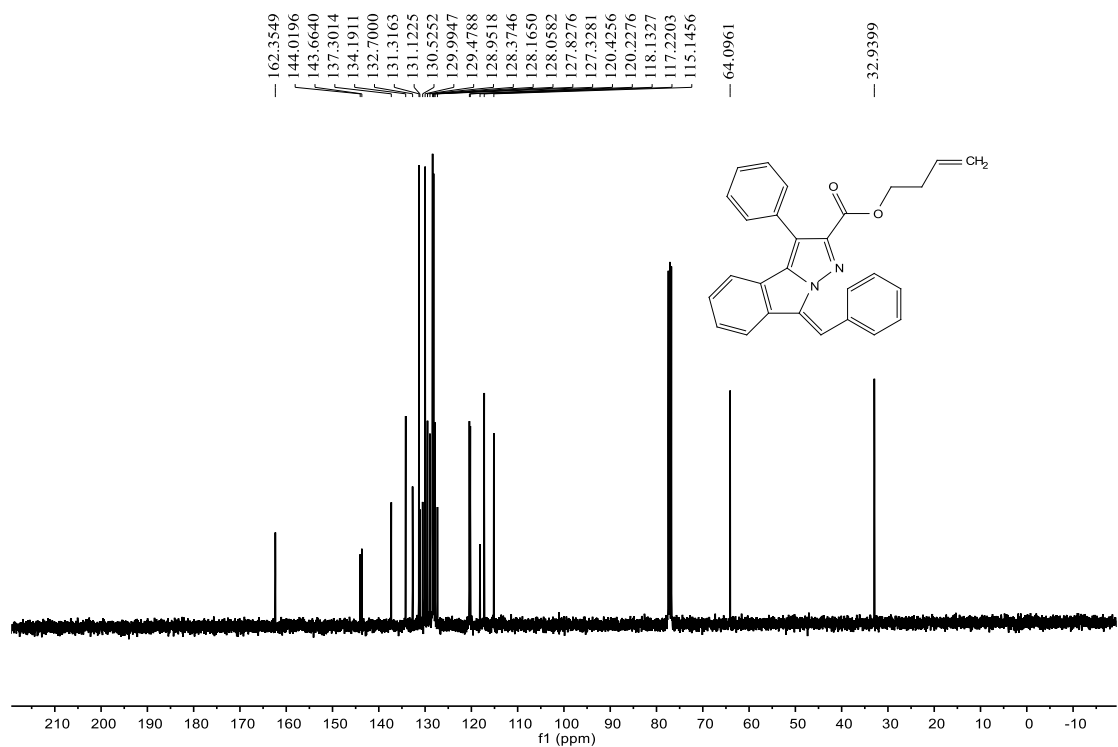

<sup>1</sup>H NMR spectra of compound **3fa**.

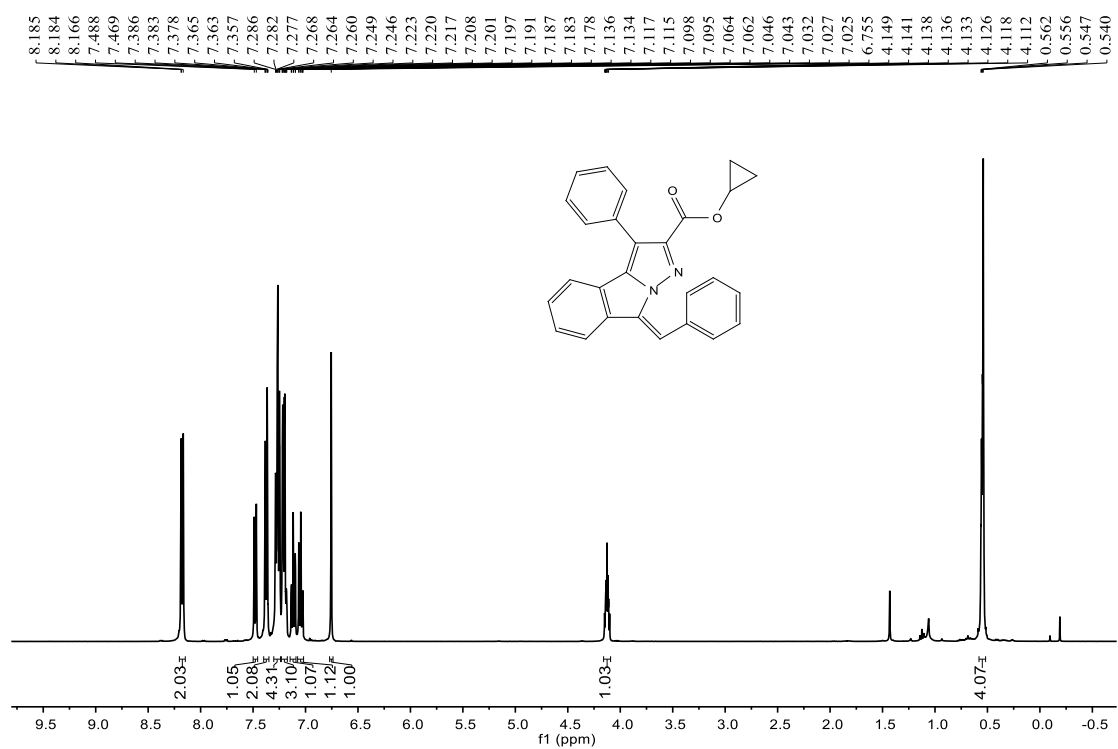

<sup>13</sup>C NMR spectra of compound **3fa**.

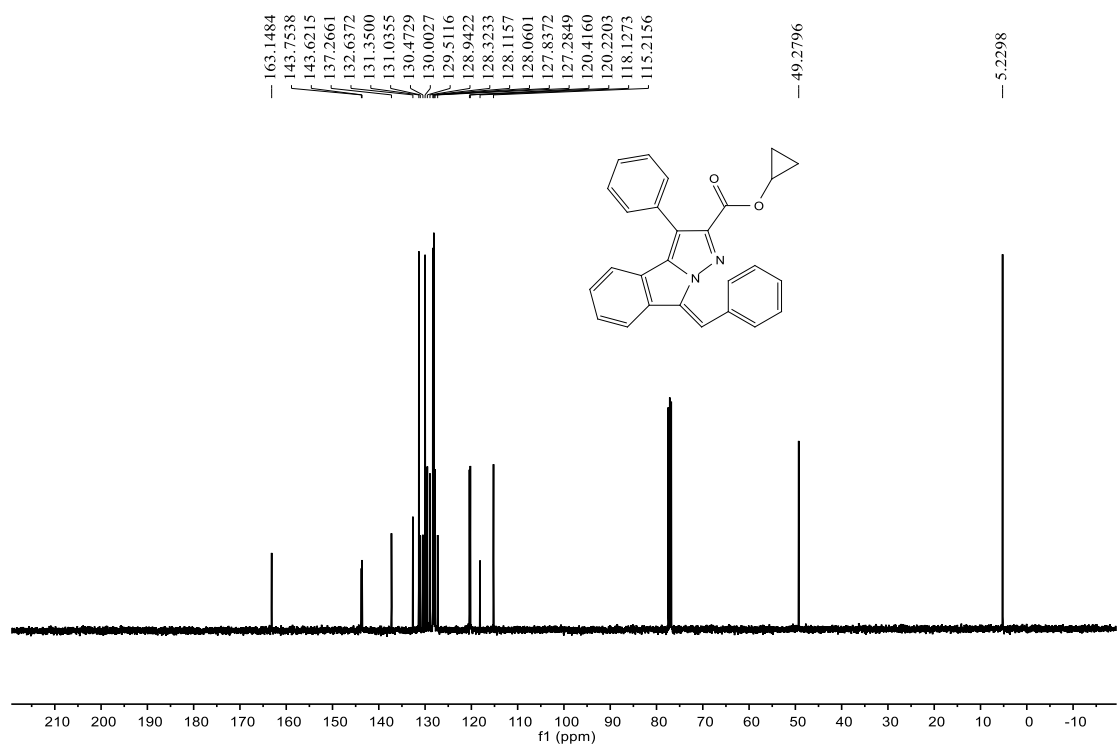

<sup>1</sup>H NMR spectra of compound **3ga**.

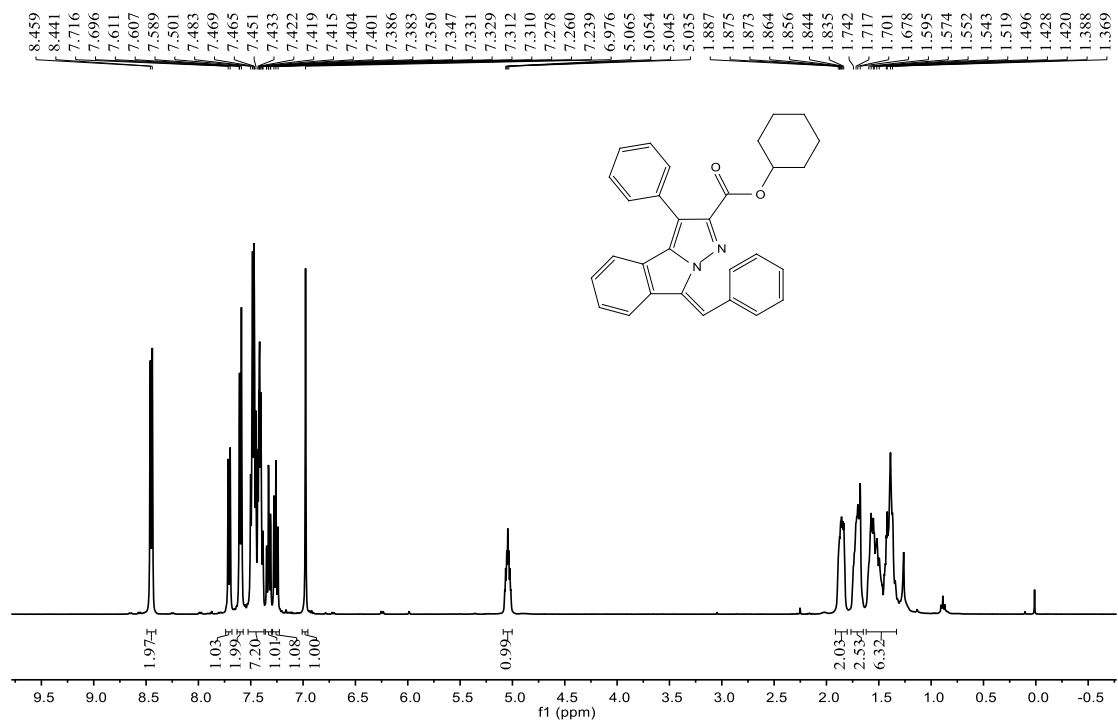

<sup>13</sup>C NMR spectra of compound **3ga**.

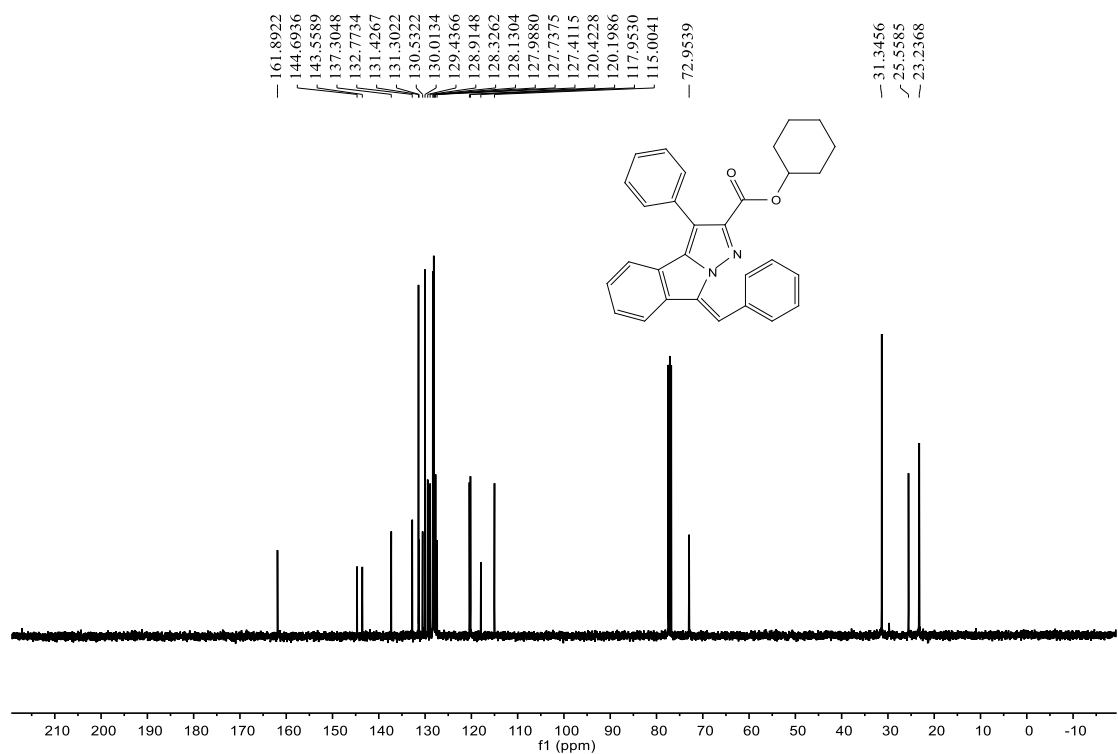

<sup>1</sup>H NMR spectra of compound **3ha**.

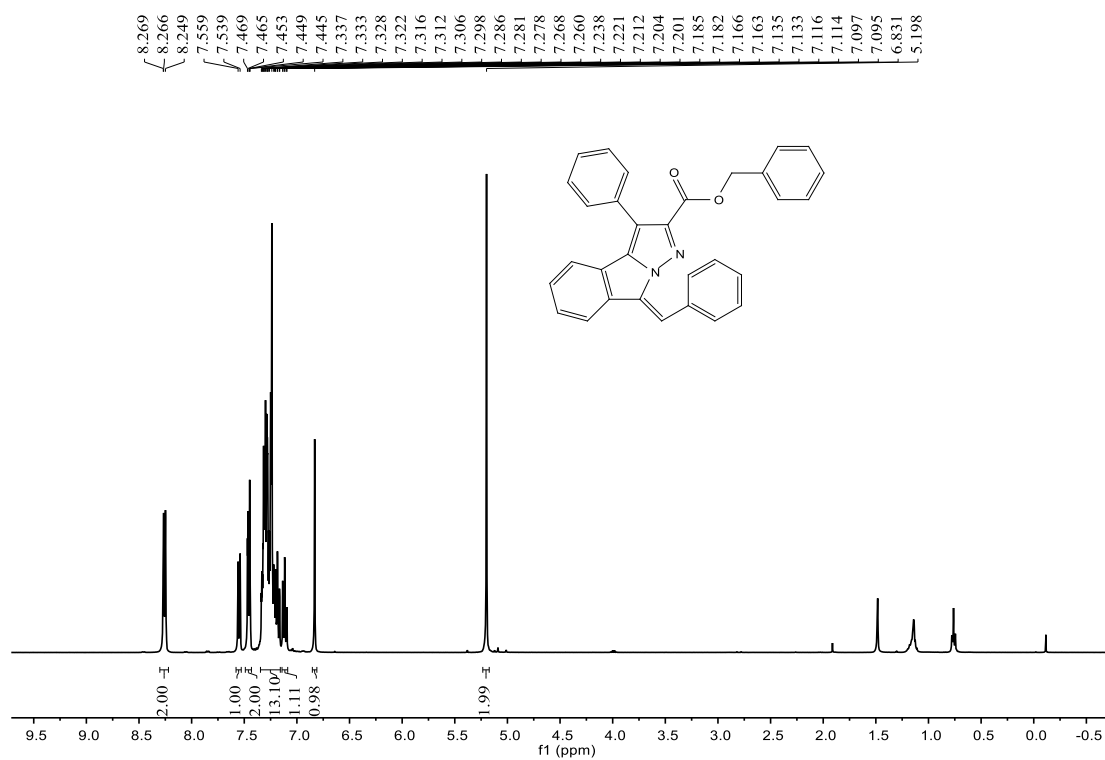

<sup>13</sup>C NMR spectra of compound **3ha**.

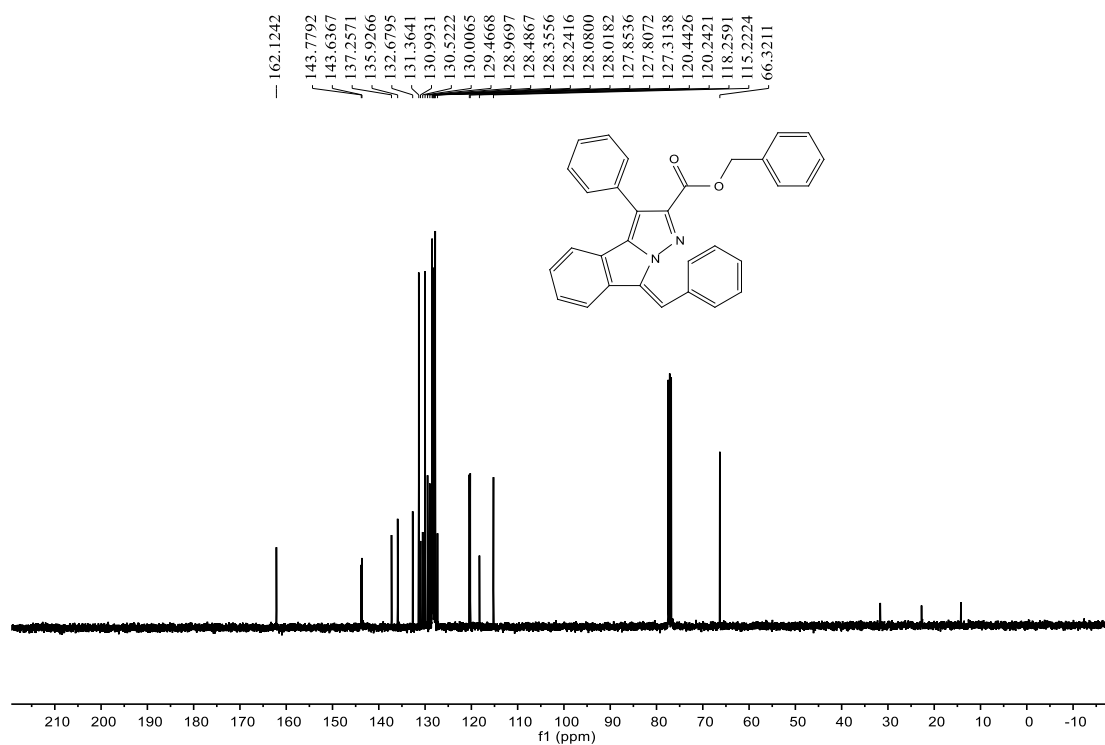

<sup>1</sup>H NMR spectra of compound **3ia**.

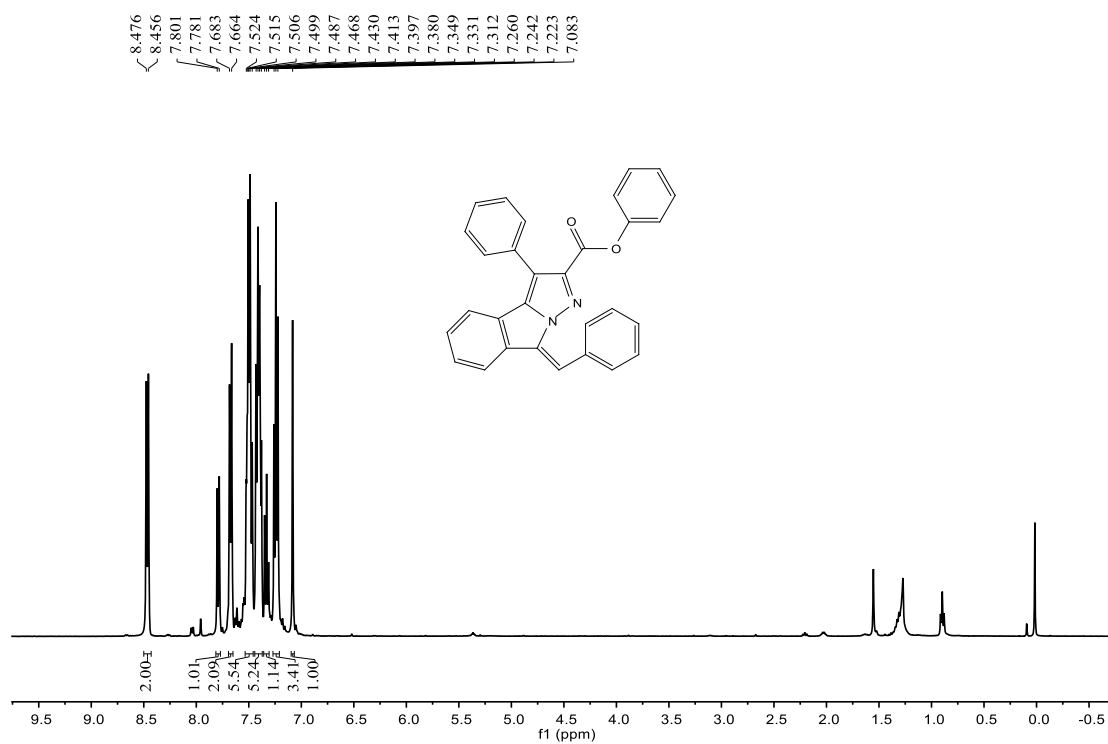

<sup>13</sup>C NMR spectra of compound **3ia**.

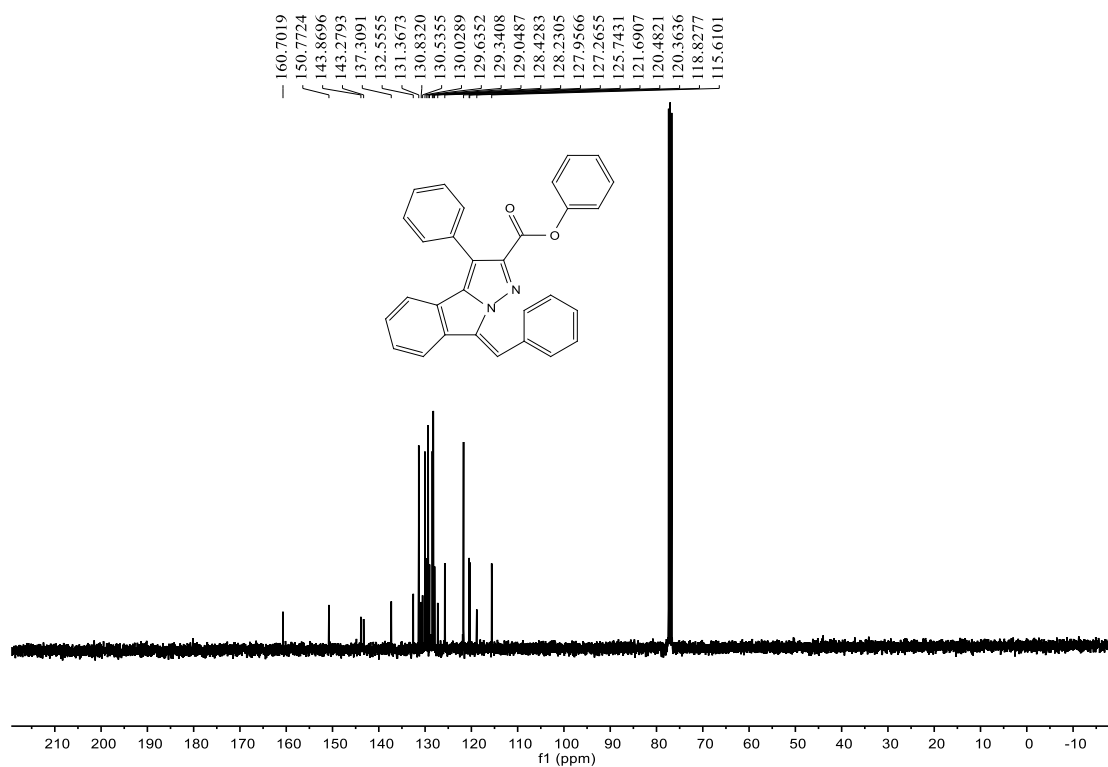

<sup>1</sup>H NMR spectra of compound **3ja**.

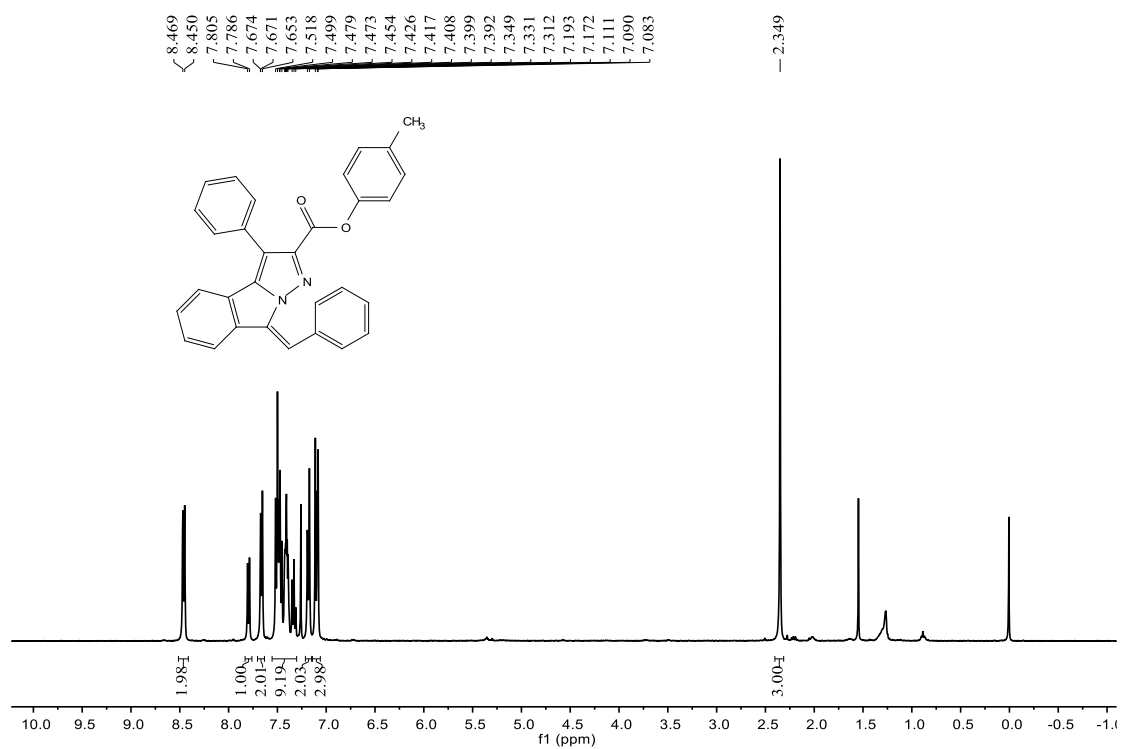

<sup>13</sup>C NMR spectra of compound **3ja**.

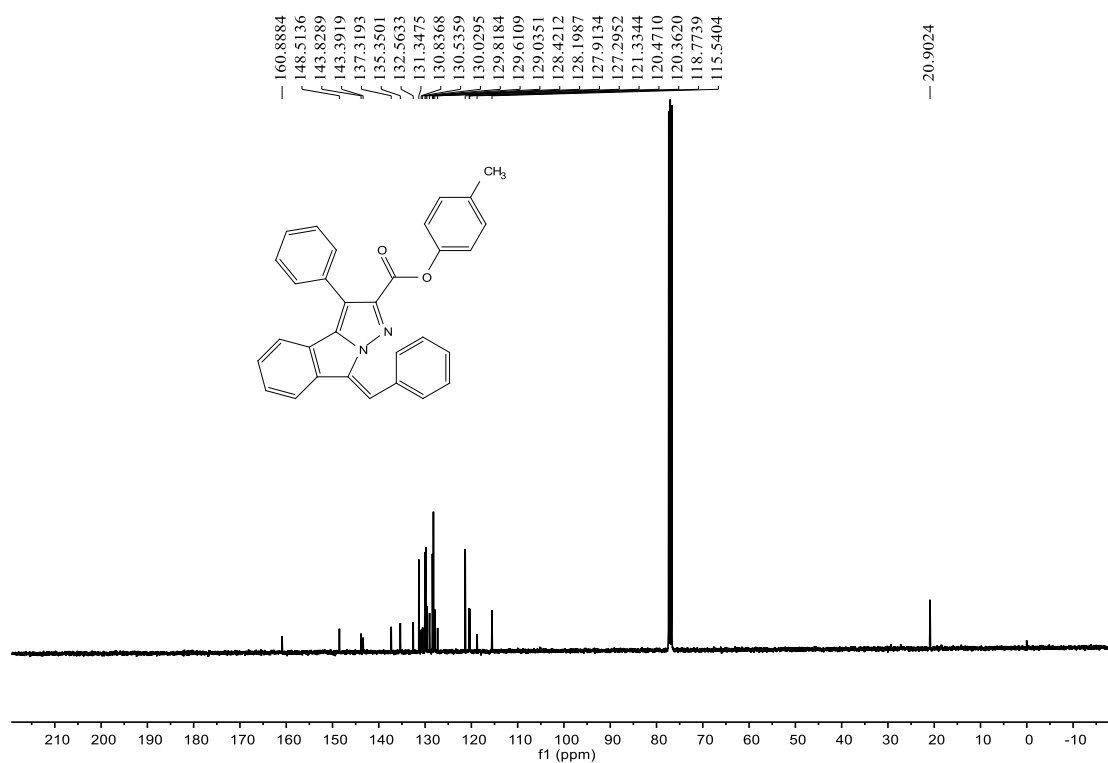

<sup>1</sup>H NMR spectra of compound **3ka**.

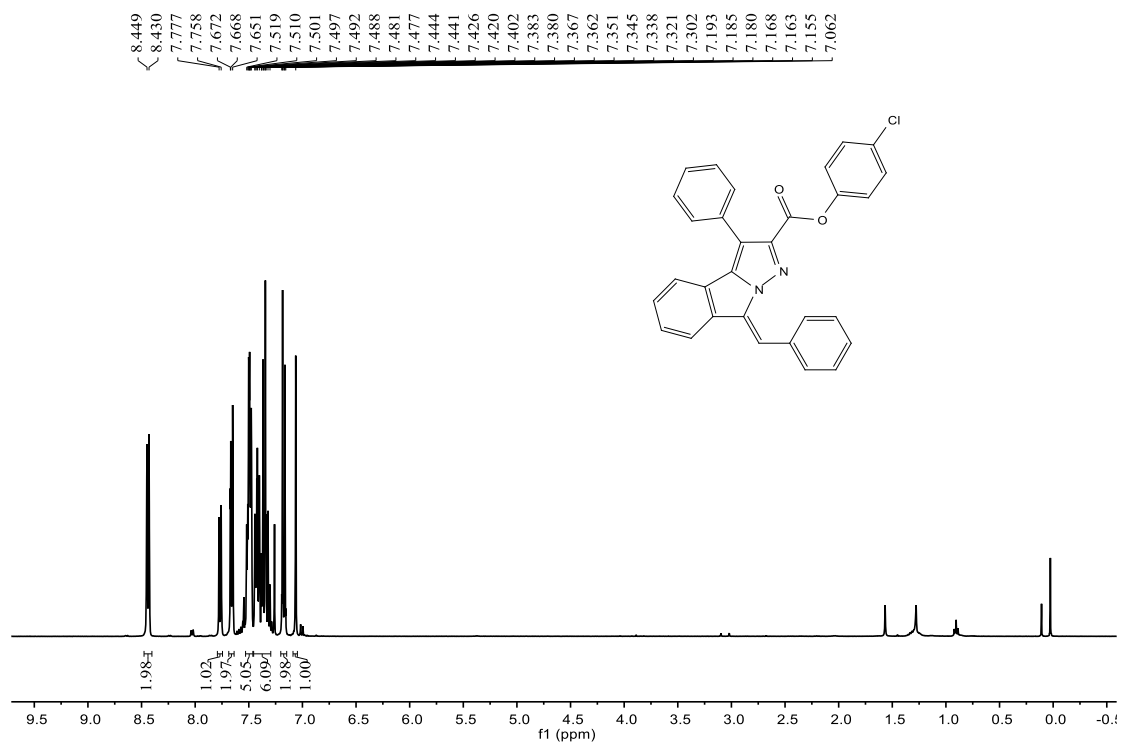

<sup>13</sup>C NMR spectra of compound **3ka**.

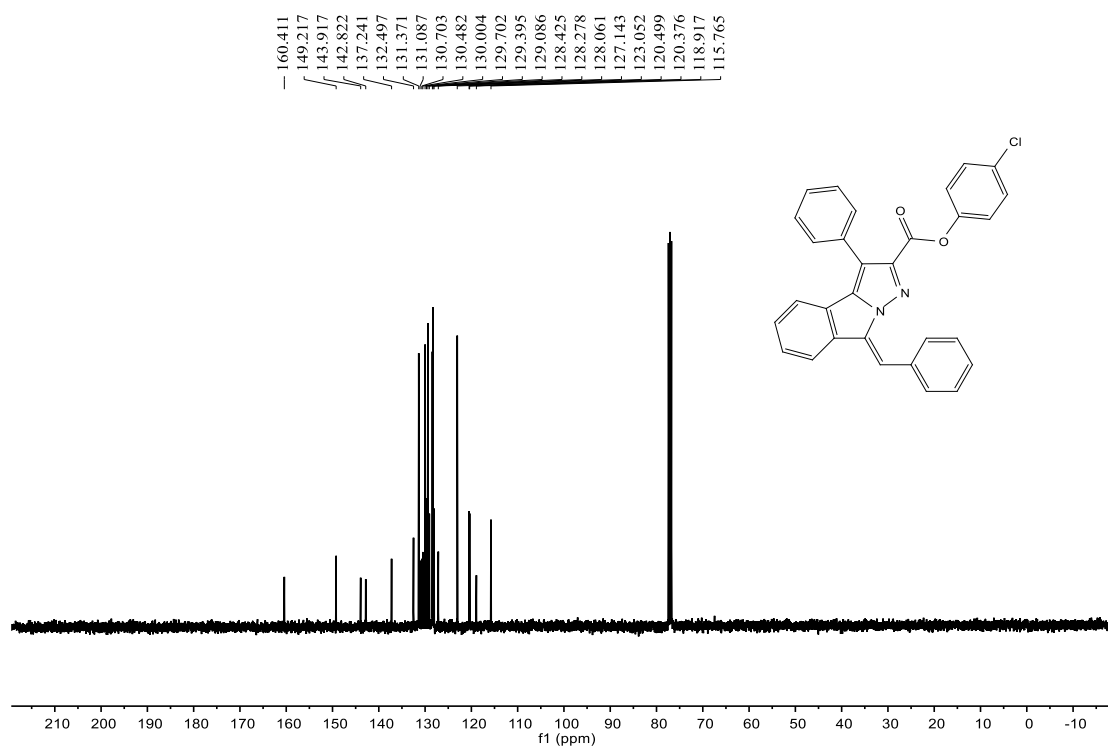

### <sup>1</sup>H NMR spectra of compound **3la**.

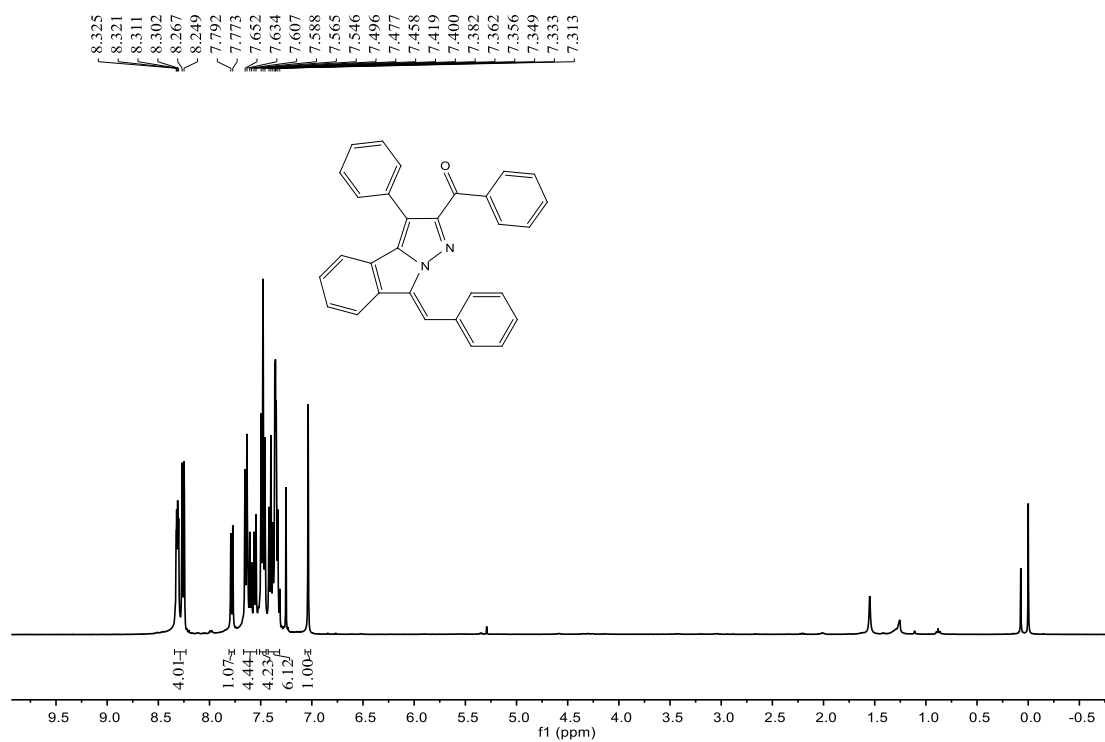

### <sup>13</sup>C NMR spectra of compound **3la**.

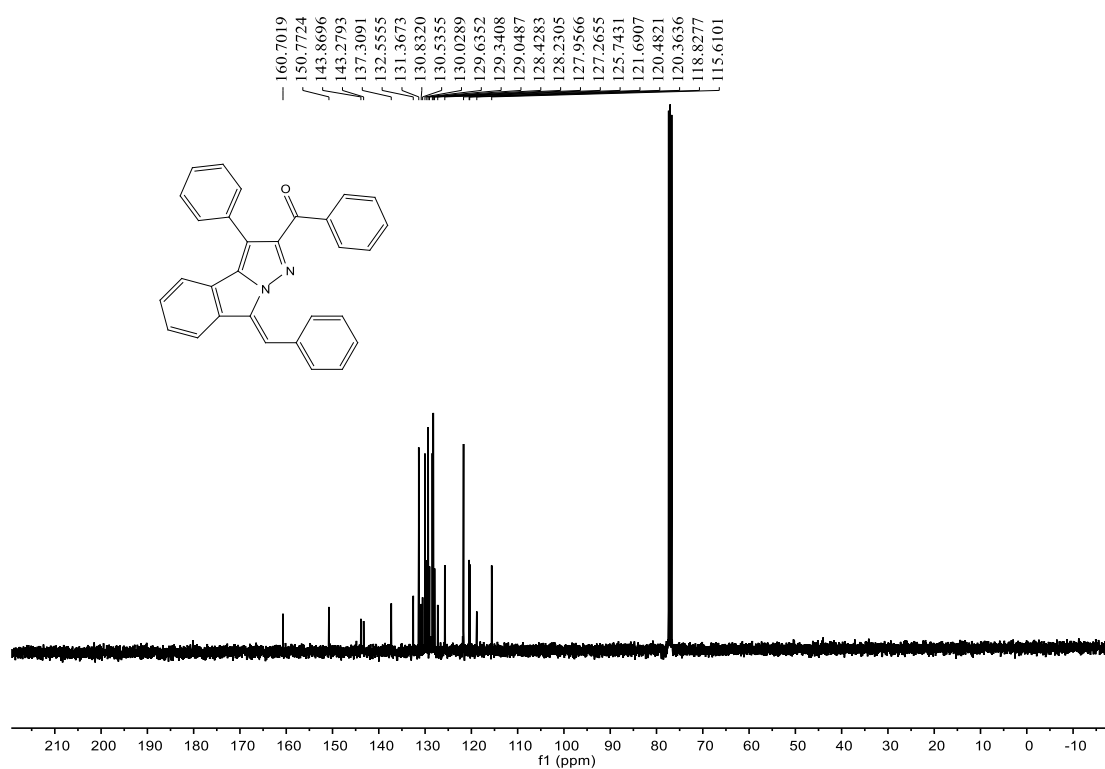

<sup>1</sup>H NMR spectra of compound **3ma**.

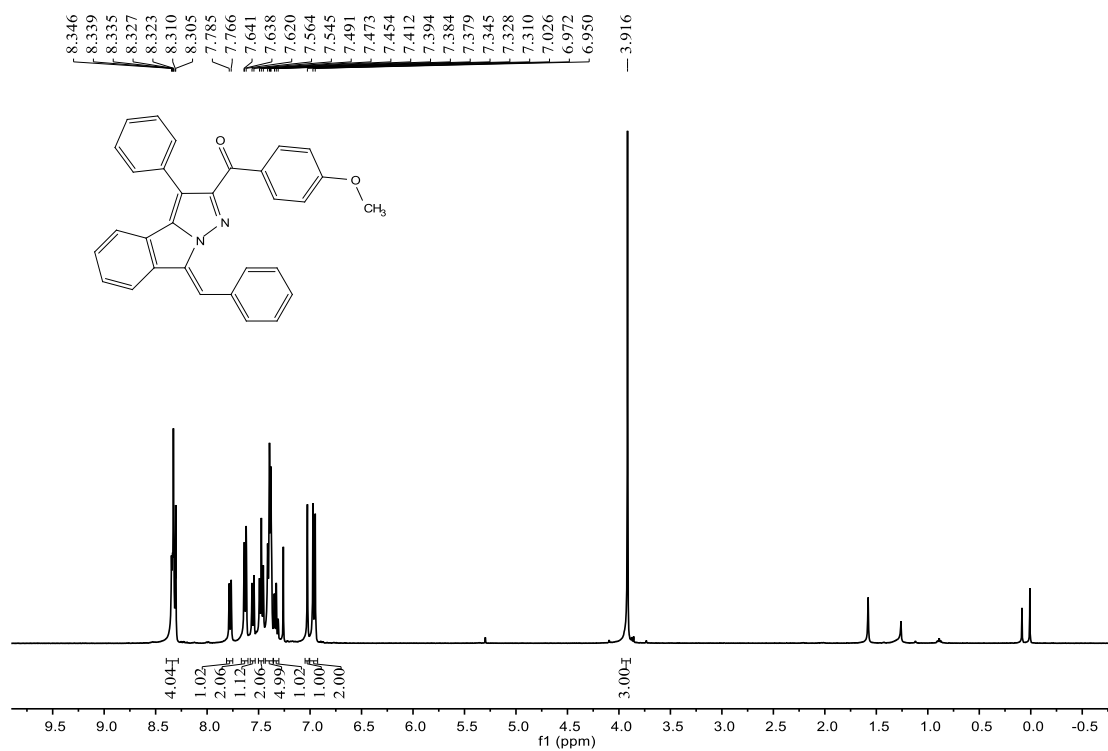

<sup>13</sup>C NMR spectra of compound **3ma**.

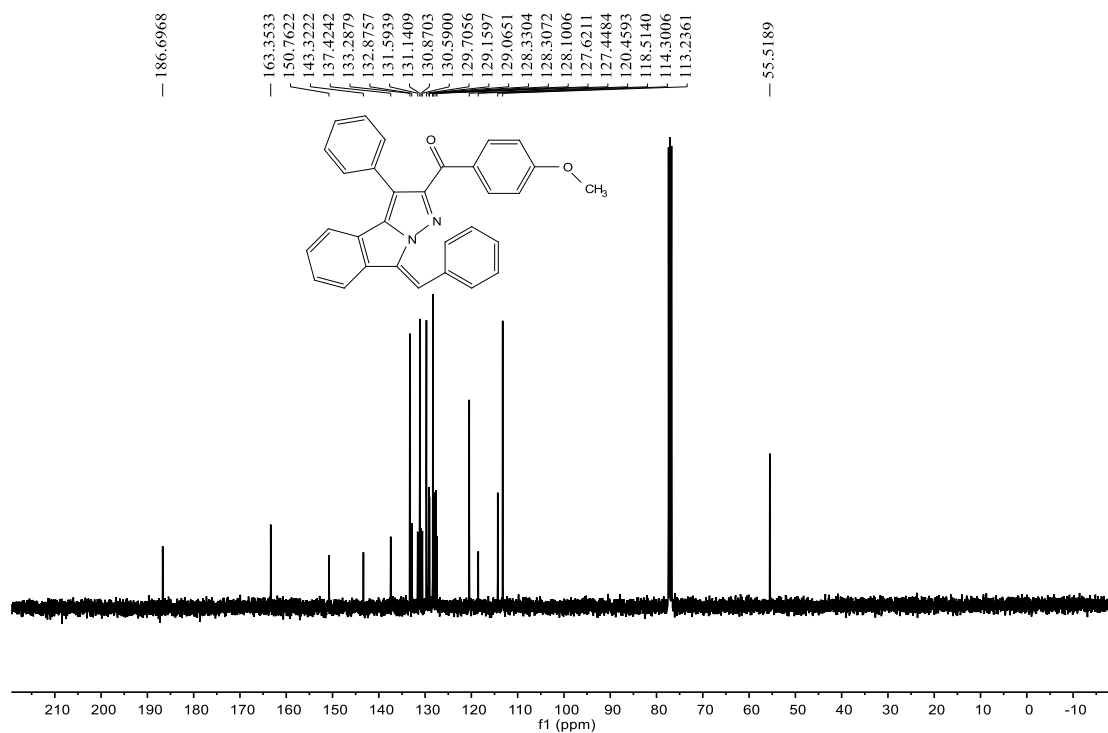

### $^1\text{H}$ NMR spectra of compound 4.

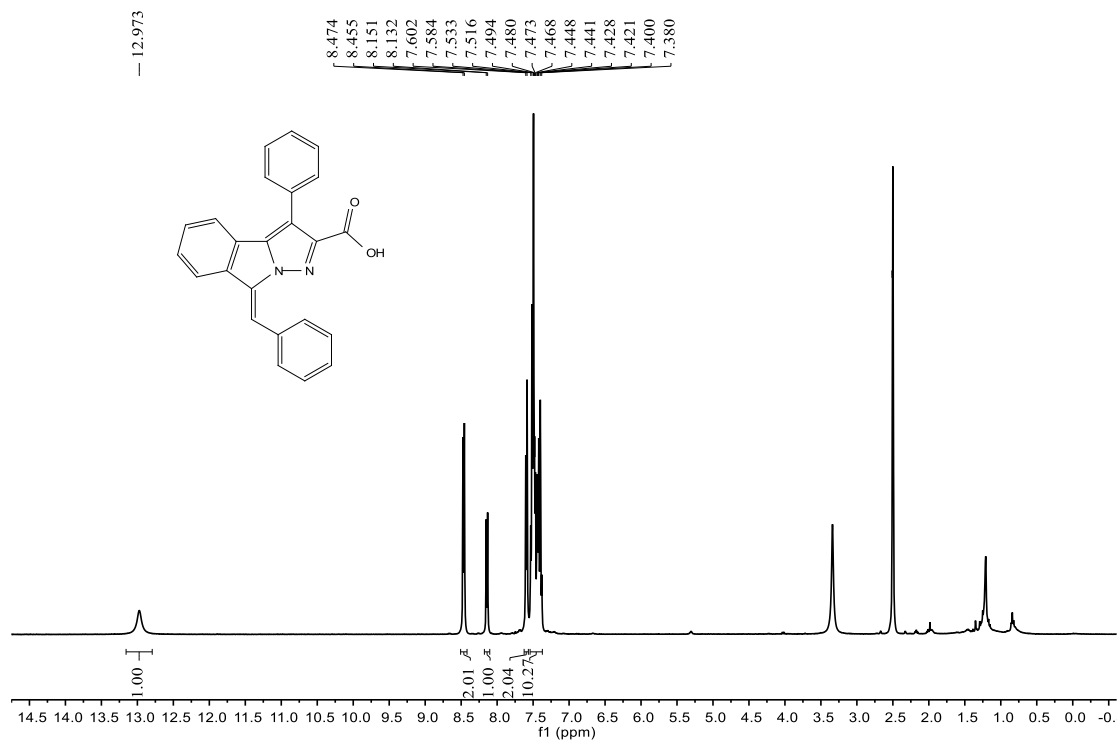

### $^{13}\text{C}$ NMR spectra of compound 4.

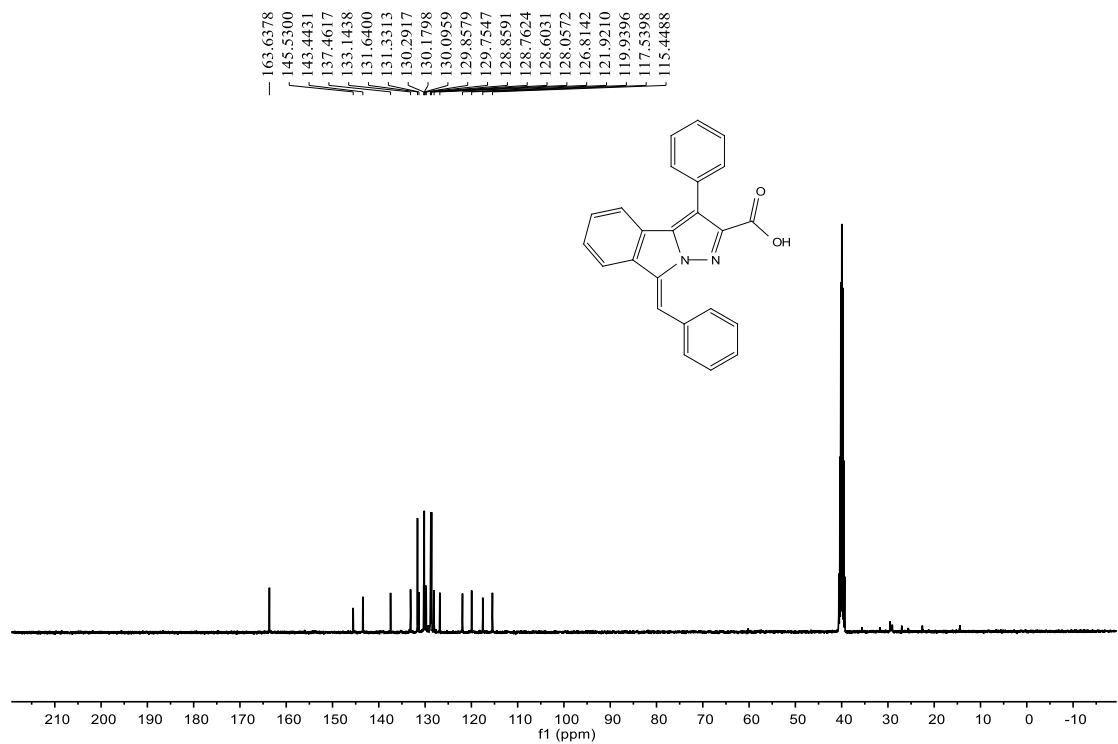

<sup>1</sup>H NMR spectra of compound 5.

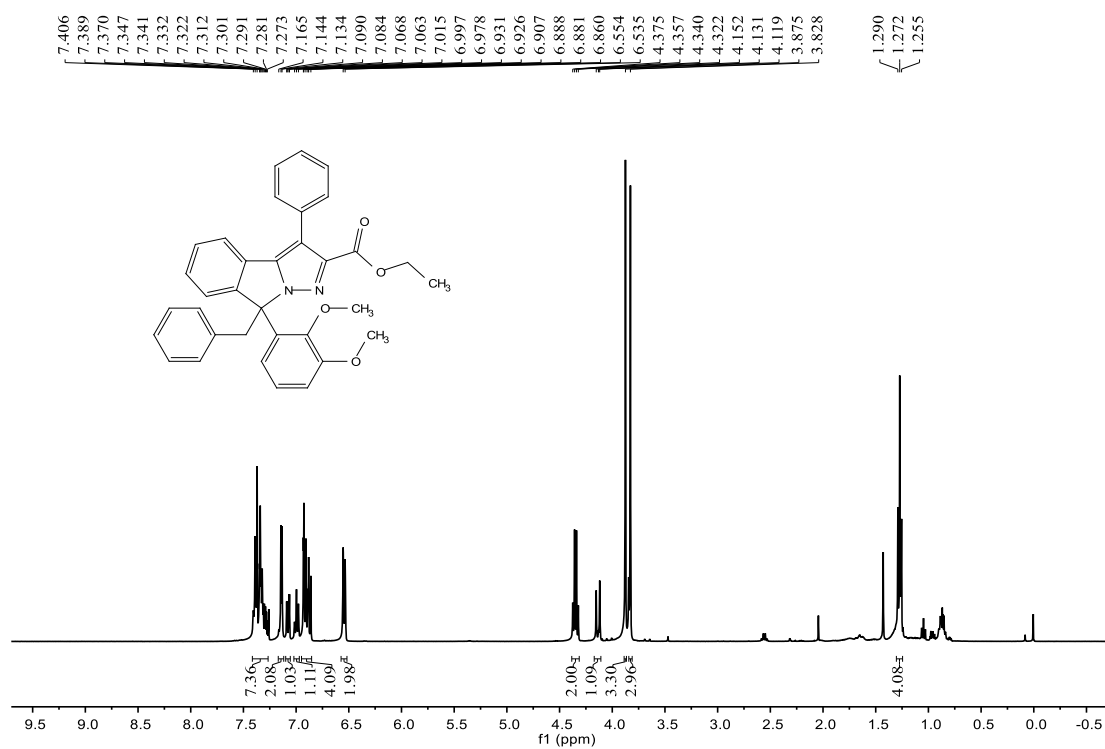

<sup>13</sup>C NMR spectra of compound 5.

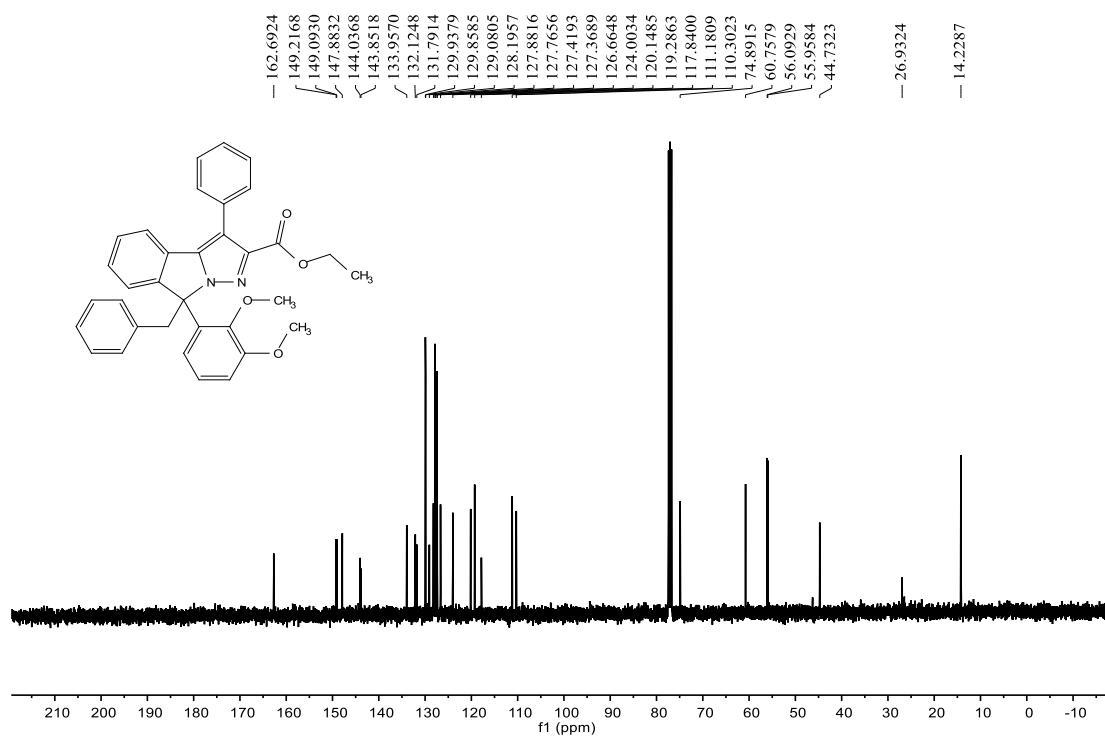

### $^1\text{H}$ NMR spectra of compound 6.

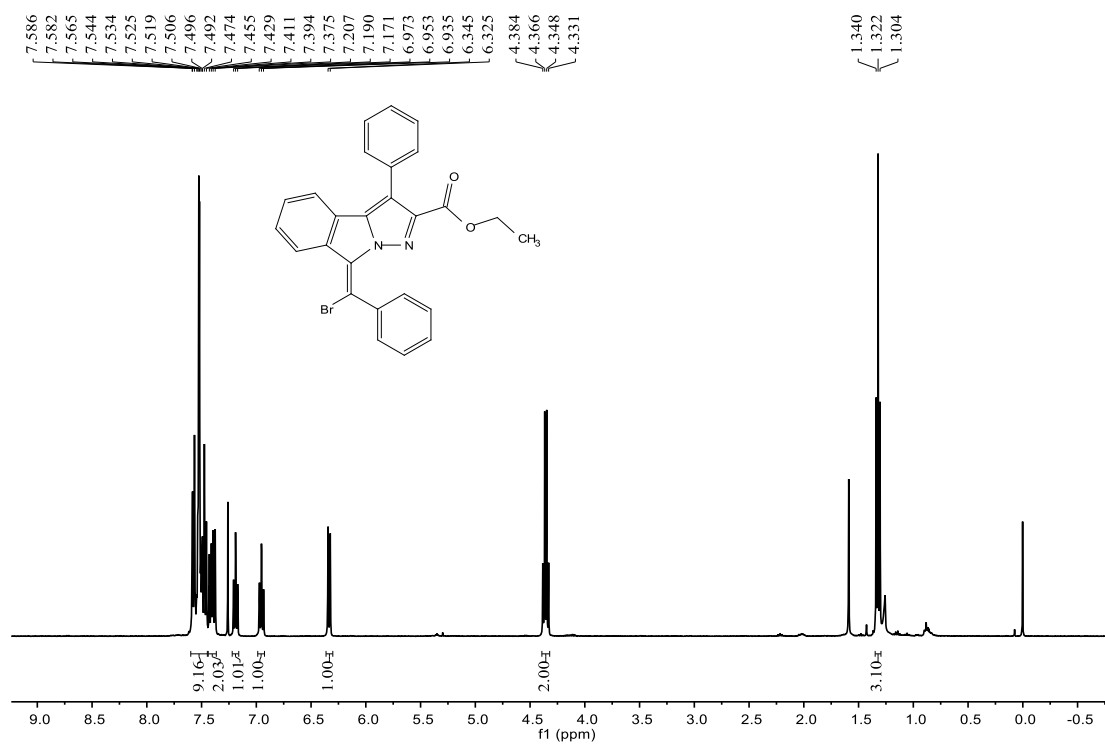

### $^{13}\text{C}$ NMR spectra of compound 6.

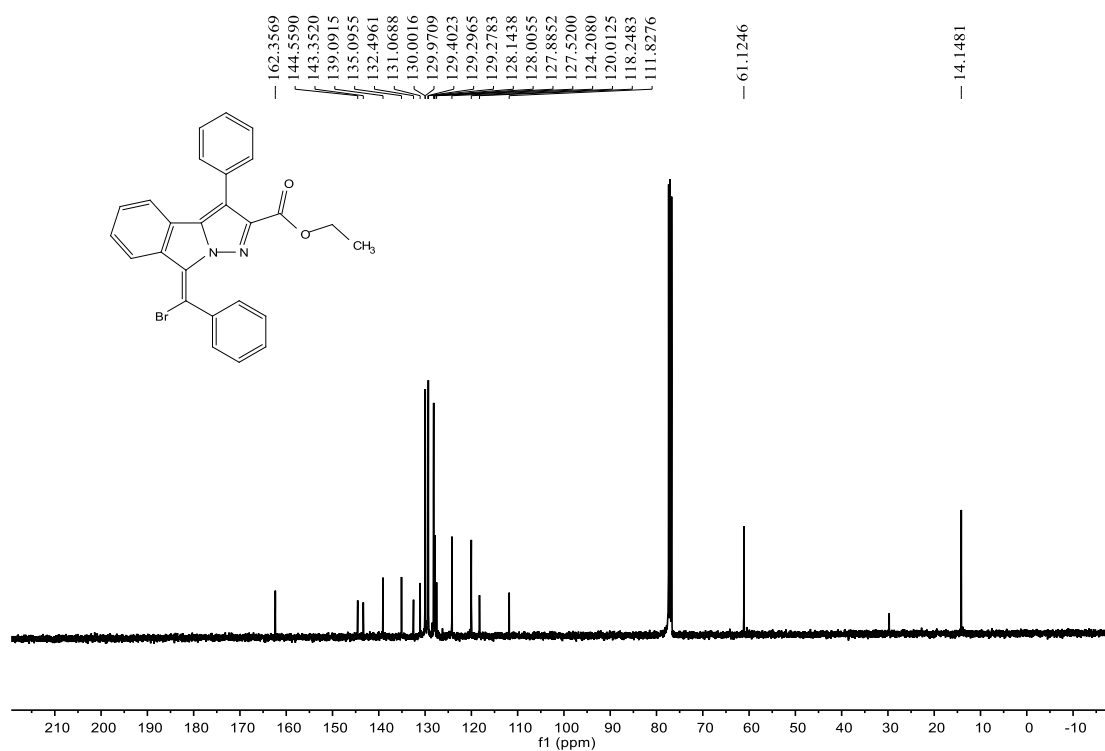

$^1\text{H}$  NMR spectra of compound 7.

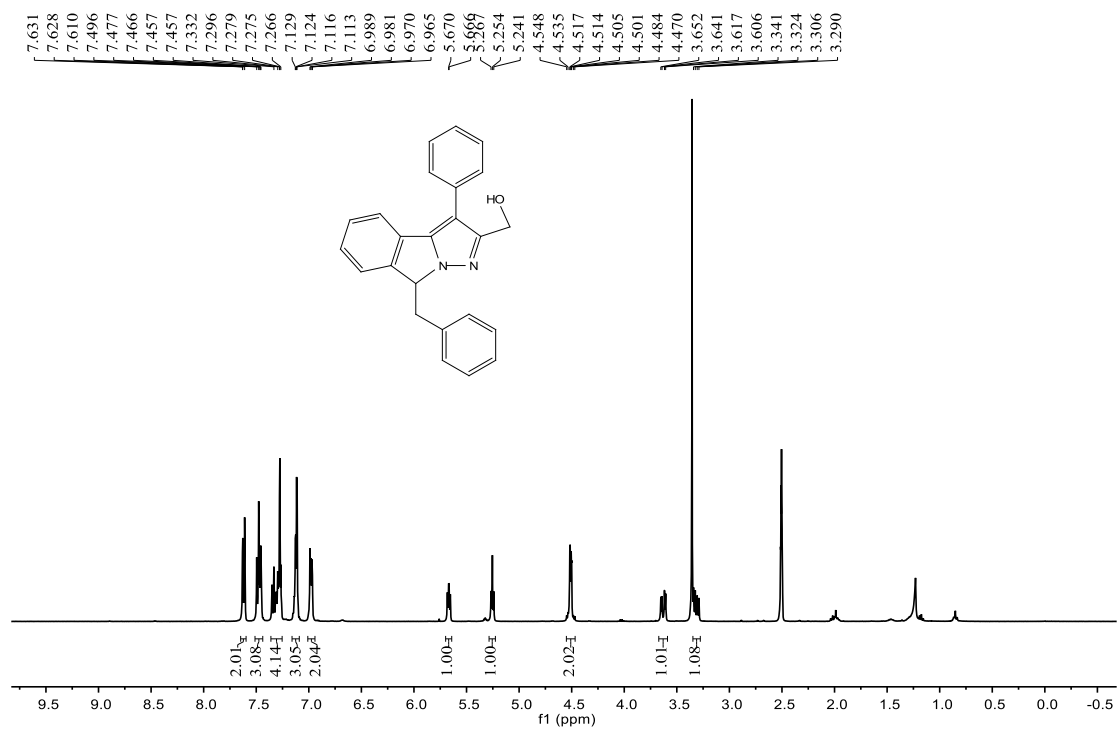

$^{13}\text{C}$  NMR spectra of compound 7.

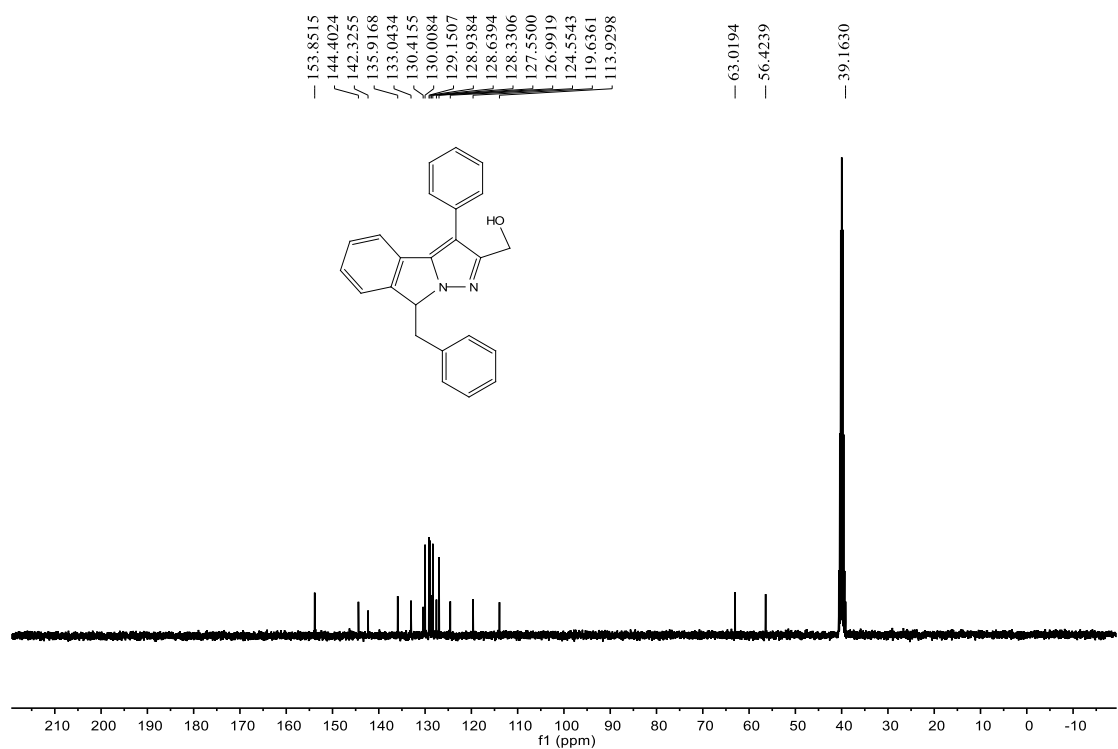

<sup>1</sup>H NMR spectra of compound **8**.

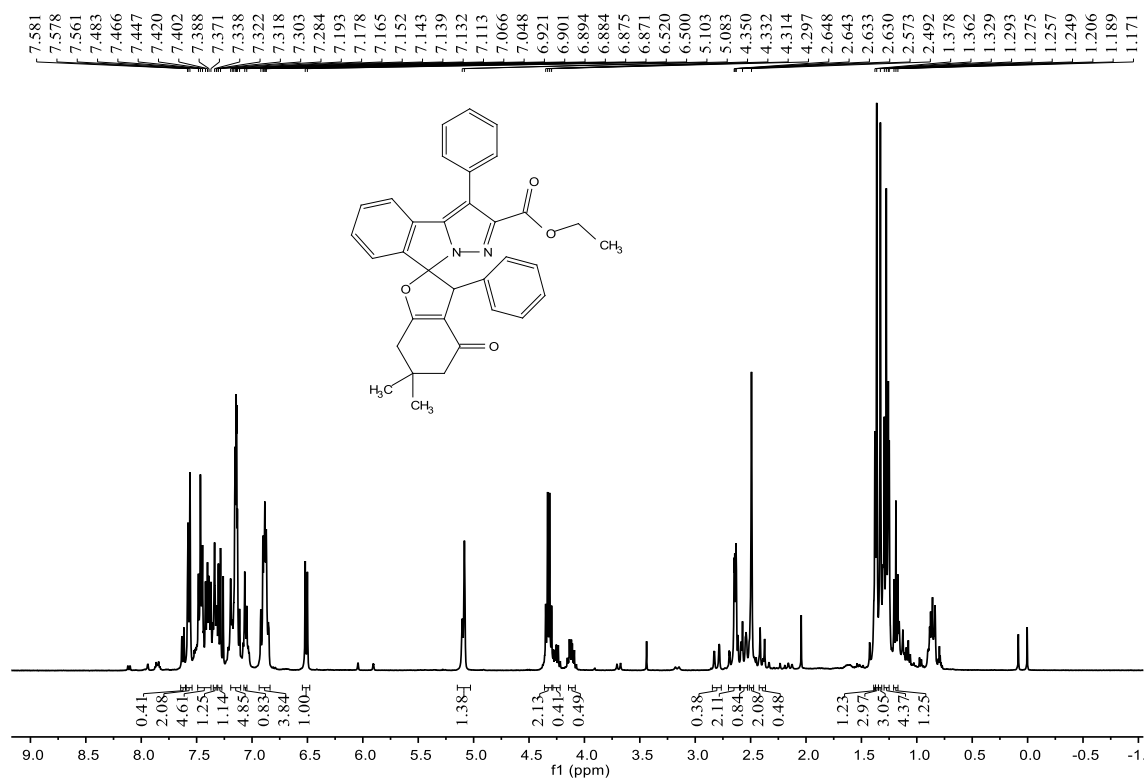

<sup>13</sup>C NMR spectra of compound **8**.

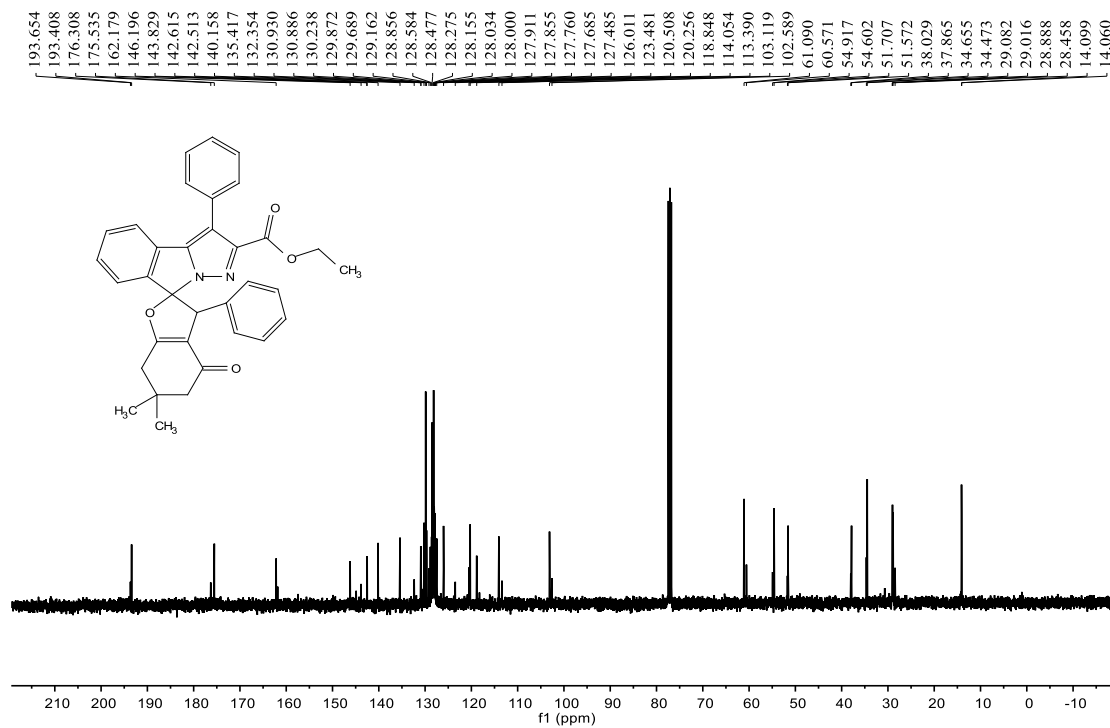

$^1\text{H}$  NMR spectra of compound **9**.

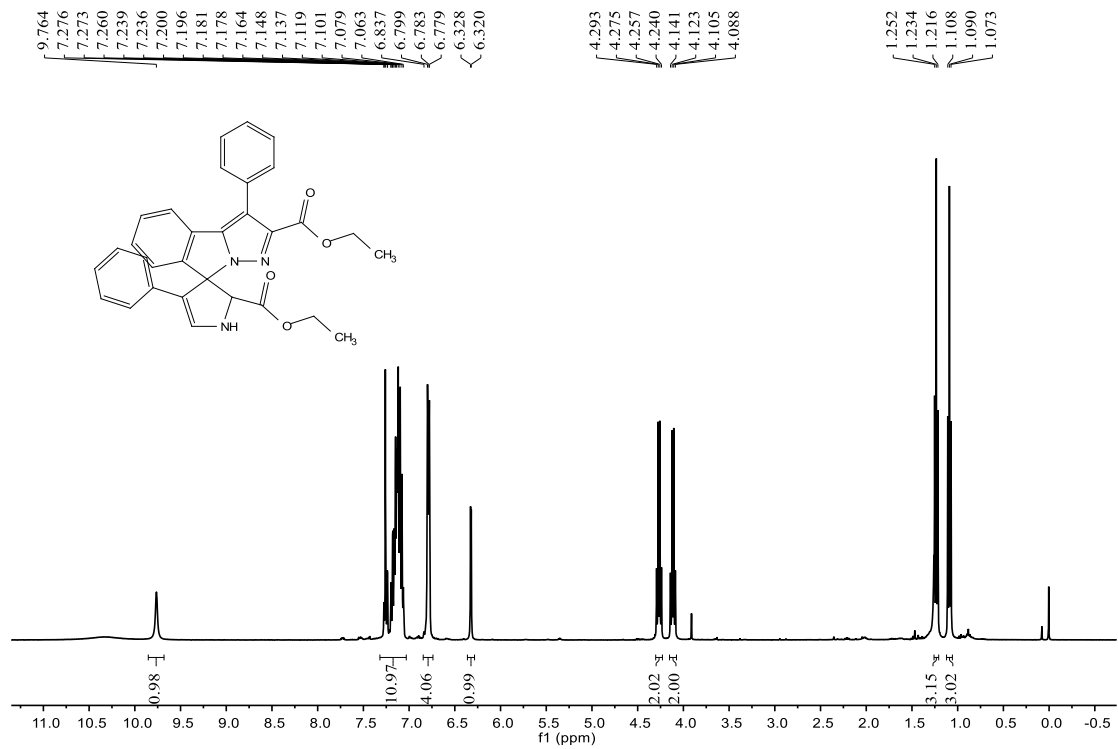

$^{13}\text{C}$  NMR spectra of compound **9**.

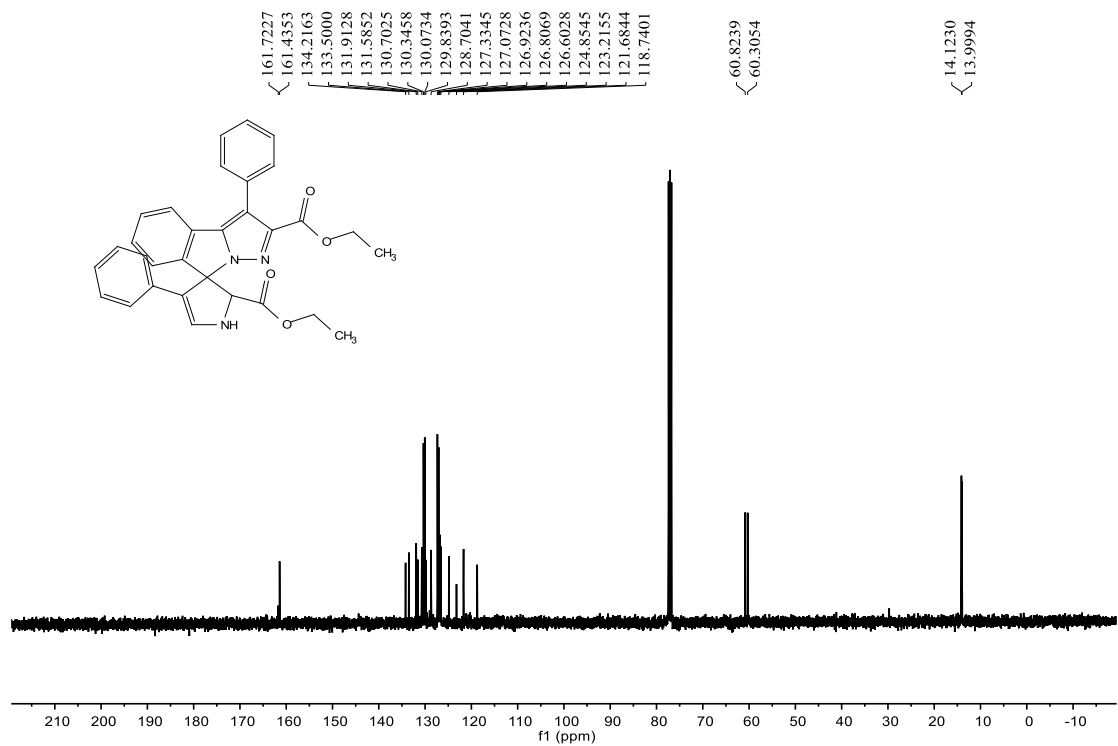

<sup>1</sup>H NMR spectra of compound **10**.

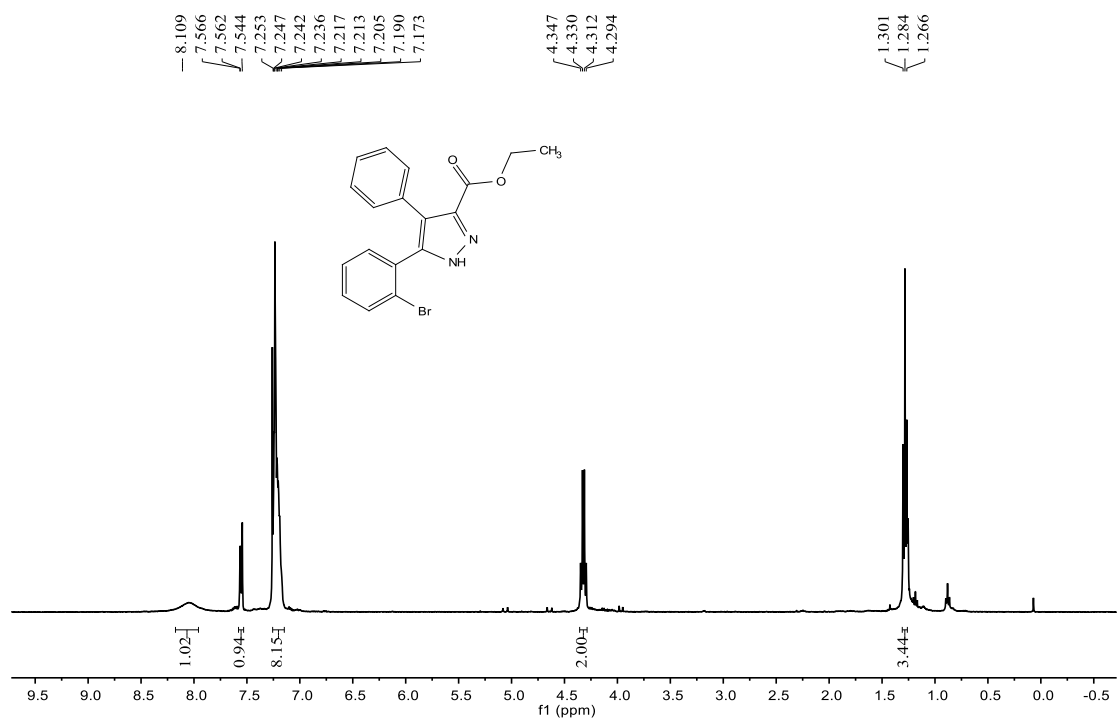

<sup>13</sup>C NMR spectra of compound **10**.

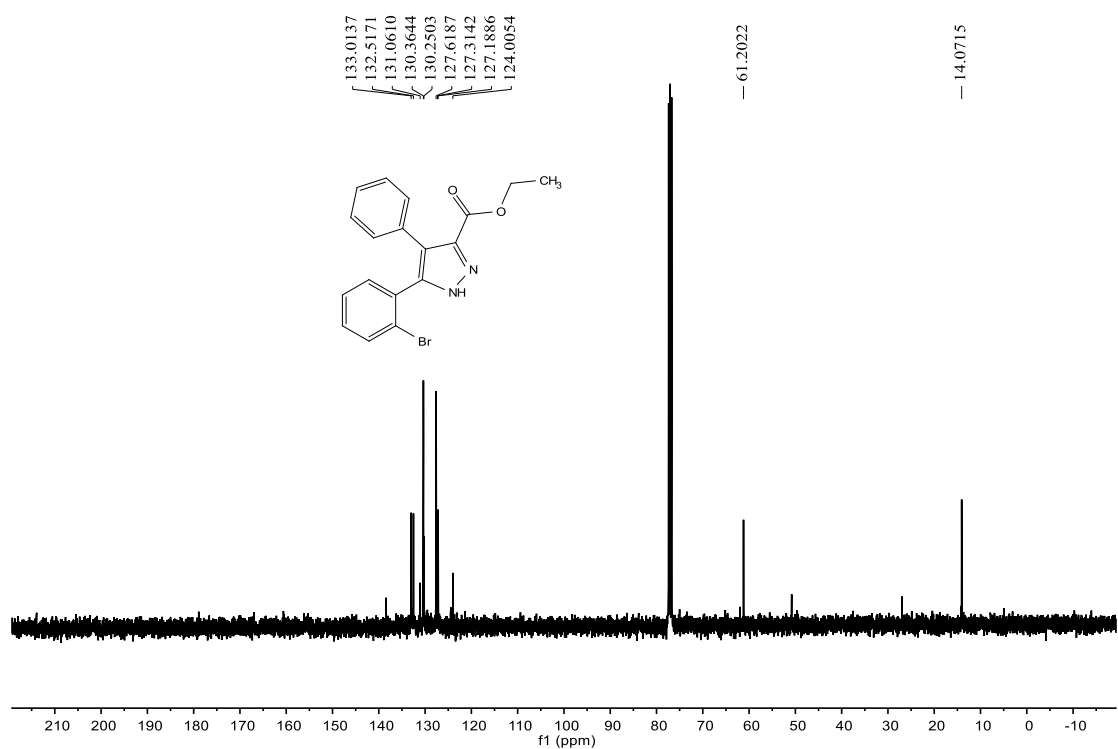

Supplement: d6cc01160h1.pdf [file d6cc01160h1.pdf]
